# Supplementary material for: Genomic Sequencing of Phyllosticta citriasiana Provides Insight Into Its Conservation and Diversification With Two Closely Related Phyllosticta Species Associated With Citrus
Source: Front Microbiol. 2020 Jan 10;10:2979. doi: 10.3389/fmicb.2019.02979 (PMC6965161; doi:10.3389/fmicb.2019.02979)
Supplement: Supplementary file 1 [file Data_Sheet_1.xlsx]

## Sheet: S1
TableS1-Identification of the CAZymes in P. capitalensis
Gene ID	HMMER	Hotpep	DIAMOND	Signalp	#ofTools
cF00133	AA9(6-227)	AA9	N	N	2
cF00162	AA5(689-1206)	AA5	AA5_1	Y(1-26)	3
cF00187	GT15(119-429)	GT15	GT15	N	3
cF00217	AA1_2(45-383)	AA1	AA1_2	Y(1-25)	3
cF00361	AA3(11-537)	AA3	AA3_2	N	3
cF00384	GH13_8(246-539)	GH13+CBM48	CBM48+GH13_8	N	3
cF00387	GH16(96-355)	GH16	GH16	N	3
cF00441	GH142(439-926)	N	GH142	N	2
cF00505	GH6(71-381)	GH6	CBM1+GH6	Y(1-18)	3
cF00546	AA4(6-567)	AA4	AA4	N	3
cF00563	PL1_4(115-301)	PL1	PL1_4	Y(1-26)	3
cF00596	GH115(35-672)	GH115	GH115	Y(1-21)	3
cF00668	GH18(44-376)	GH18	GH18	N	3
cF00705	GH3(74-329)	GH3	GH3	N	3
cF00781	GH43_26(44-365)	N	GH43_26	Y(1-24)	2
cF00820	GH3(91-309)	GH3	GH3	Y(1-21)	3
cF00828	AA3_2(945-1355)	AA3+AA8	AA3_2	N	3
cF00869	AA1_3(138-455)	AA1	AA1_3+CBM18	N	3
cF00878	GH3(60-267)	GH3	GH3	N	3
cF00902	GH18(31-350)	GH18	N	Y(1-23)	2
cF00922	GT62(100-365)	GT62	GT62	N	3
cF00990	GT62(73-337)	GT62	GT62	N	3
cF01007	GH3(84-302)	GH3	GH3	Y(1-25)	3
cF01041	GT20(135-591)	GT20	GT20	N	3
cF01094	GH76(118-528)	GH76	GH76	Y(1-38)	3
cF01162	GH47(1-509)	GH47	GH47	N	3
cF01229	GT57(70-566)	GT57	GT57	N	3
cF01270	GH18(30-285)	GH18	CBM1+GH18	Y(1-23)	3
cF01306	GH13_25(1076-1528)	GH133	GH133+GH13_25	N	3
cF01394	GH47(200-685)	GH47	GH47	Y(1-32)	3
cF01447	GH2(15-678)	GH2	GH2	N	3
cF01448	PL1_2(74-249)	PL1	PL1_2	N	3
cF01466	GT50(22-293)	GT50	GT50	N	3
cF01483	CE8(23-318)	CE8	CE8	N	3
cF01493	GT1(299-606)	GT1	GT1	N	3
cF01526	AA3_2(166-713)	AA3	AA3_2	N	3
cF01530	GH105(11-378)	GH105	N	N	2
cF01625	GH43_13(40-338)	GH43	GH43_13	N	3
cF01802	GH3(119-316)	GH3	GH3	Y(1-20)	3
cF01844	GH17(74-297)	GH17	N	N	2
cF01890	GT1(946-1359)	GT1	GT1	N	3
cF01908	GH131(22-258)	GH131	N	Y(1-19)	2
cF01943	GH16(109-312)	N	GH16	N	2
cF02086	GH16(47-178)	GH16	N	Y(1-25)	2
cF02130	GT33(1-390)	GT33	GT33	N	3
cF02132	GH7(26-460)	GH7	GH7	Y(1-20)	3
cF02136	GH5_4(75-345)+CBM46(389-465)	GH5	CBM1+GH5_4	Y(1-33)	3
cF02223	GH72(19-289)	GH72	GH72	Y(1-23)	3
cF02227	AA3_2(36-601)	AA3	AA3_2	Y(1-27)	3
cF02272	GH3(78-303)	N	GH3	N	2
cF02273	CE9(19-411)	CE9	CE9	N	3
cF02298	GH47(104-589)	GH47	GH47	N	3
cF02347	GH15(65-518)	GH15	GH15	N	3
cF02493	GH37(145-703)	GH37	GH37	N	3
cF02499	GH2(45-698)	GH2	GH2	N	3
cF02519	GT66(3-654)	GT66	GT66	N	3
cF02564	GT39(58-303)	GT39	GT39	N	3
cF02583	GH16(53-224)	GH16	N	Y(1-21)	2
cF02584	AA1_3(164-479)	AA1	AA1_3	Y(1-23)	3
cF02613	GH92(234-739)	GH92	GH92	Y(1-18)	3
cF02620	GT4(141-299)	GT4	GT4	N	3
cF02656	AA9(7-192)	AA9	N	Y(1-19)	2
cF02774	GH78(245-627)	GH78	GH78	Y(1-20)	3
cF02792	GH28(43-365)	GH28	GH28	Y(1-20)	3
cF02798	AA1_3(74-391)	AA1	AA1_3	Y(1-20)	3
cF02870	AA1_3(24-336)	AA1	AA1_3	N	3
cF02881	GH43_6(36-322)	GH43	GH43_6	Y(1-25)	3
cF02914	GT2(228-405)	N	GT2	N	2
cF02985	AA3(55-611)	AA3	AA3_2	Y(1-21)	3
cF03044	GH2(23-764)	GH2	GH2	N	3
cF03083	AA11(22-207)	AA11	N	N	2
cF03159	GT4(512-682)	N	GT4	N	2
cF03253	AA3(31-645)	AA3	AA3	N	3
cF03258	AA7(53-482)	N	AA7	Y(1-21)	2
cF03284	GH16(52-247)	GH16	N	Y(1-24)	2
cF03316	GH131(66-320)	GH131	N	Y(1-19)	2
cF03364	GH47(232-735)	GH47	GH47	N	3
cF03422	GH71(40-418)	GH71	CBM24+GH71	Y(1-20)	3
cF03446	GT34(69-294)	GT34	N	N	2
cF03477	GT8(18-292)	GT8	GT8	N	3
cF03515	AA8(6-793)	AA3+AA8	AA3_1+AA8+CBM1	Y(1-21)	3
cF03540	GT3(28-655)	GT3	GT3	N	3
cF03543	AA11(21-213)	AA11	N	Y(1-21)	2
cF03553	GH3(77-281)	GH3	GH3	Y(1-26)	3
cF03565	GT24(1191-1438)	GT24	GT24	Y(1-27)	3
cF03577	AA3_3(5-640)	AA3	AA3_3	N	3
cF03621	GH16(81-320)	GH16	N	Y(1-27)	2
cF03633	GT34(169-450)	GT34	GT34	N	3
cF03656	AA3_2(6-616)	AA3+AA8	AA3_2	N	3
cF03672	GH3(75-317)	GH3	GH3	Y(1-24)	3
cF03683	GH55(78-824)	GH55	GH55	Y(1-22)	3
cF03765	GH31(232-707)	GH31	GH31	N	3
cF03795	GT69(60-316)	GT69	GT69	N	3
cF03822	GH1(5-453)	GH1	GH1	N	3
cF03850	GH5_9(83-356)	GH5	GH5_9	N	3
cF03891	AA1_3(33-370)	AA1	AA1_3	N	3
cF03924	GH28(81-421)	GH28	GH28	Y(1-20)	3
cF03929	GH16(124-275)	GH16+CBM18	CBM18+GH16	Y(1-24)	3
cF04026	GH92(345-886)	N	GH92	Y(1-27)	2
cF04043	GH35(35-369)	GH35	GH35	Y(1-21)	3
cF04105	AA7(52-281)	N	AA7	Y(1-20)	2
cF04127	GT8(344-547)	GT8	GT8	N	3
cF04166	CE1(47-234)	CE1	N	Y(1-24)	2
cF04170	GT32(134-212)	GT32	GT32	Y(1-29)	3
cF04282	GT21(75-386)	GT21	GT21	N	3
cF04361	GT2(99-261)	N	GT2	N	2
cF04409	AA1_3(69-380)	AA1	AA1_3	Y(1-23)	3
cF04418	CE4(620-734)	N	CE4	Y(1-23)	2
cF04430	AA9(9-235)	AA9	N	Y(1-30)	2
cF04537	GT2(9-179)	GT2	GT2	N	3
cF04557	GH31(256-704)	GH31	GH31	N	3
cF04592	PL4_1(18-523)	PL4	PL4_1	Y(1-21)	3
cF04615	GH105(49-213)	GH105	GH105	N	3
cF04683	AA5_1(319-838)	AA5+CBM18	AA5+CBM18	Y(1-18)	3
cF04696	GT22(22-445)	GT22	GT22	N	3
cF04752	GH3(90-311)	GH3	GH3	Y(1-30)	3
cF04760	GH13_5(41-382)	GH13	GH13_5	N	3
cF04779	GT22(5-401)	GT22	GT22	N	3
cF04886	GH20(156-491)	N	GH20	Y(1-25)	2
cF04940	AA9(9-198)	AA9	N	Y(1-23)	2
cF04945	CE12(68-220)	CE12	N	Y(1-27)	2
cF04964	GH31(261-734)	GH31	GH31	Y(1-36)	3
cF04977	GH16(124-424)	GH16	GH16	N	3
cF04993	GH28(63-363)	GH28	GH28	Y(1-22)	3
cF05038	GH106(106-1084)	N	GH0	N	2
cF05056	GT58(13-358)	GT58	GT58	N	3
cF05075	GT62(94-295)	GT62	GT62	N	3
cF05078	GH72(19-334)	GH72	GH72	Y(1-20)	3
cF05103	CE8(41-300)	CE8	CE8	Y(1-20)	3
cF05104	GH28(57-394)	GH28	GH28	Y(1-19)	3
cF05148	GT20(91-626)	GT20	GT20	N	3
cF05183	GH51(10-438)	GH51	GH51	N	3
cF05207	GH3(73-235)	GH3	GH3	N	3
cF05236	GH13_1(57-361)	N	GH13_1	Y(1-19)	2
cF05244	CE8(30-307)	CE8	N	Y(1-26)	2
cF05247	GH1(92-560)	GH1	GH1	N	3
cF05338	GT2(113-325)	GT2	GT2	N	3
cF05361	GH16(81-248)	GH16	N	Y(1-26)	2
cF05366	GH5_5(119-402)	GH5	N	Y(1-19)	2
cF05454	GT90(314-614)	GT90	GT90	N	3
cF05459	AA3_1(30-541)	N	AA3_1	Y(1-19)	2
cF05466	GH16(57-249)	GH16	N	Y(1-22)	2
cF05516	GH18(7-363)	GH18	GH18	N	3
cF05580	GH16(151-474)	GH16	GH16	N	3
cF05622	GH31(269-793)	GH31	GH31	N	3
cF05625	AA1_3(108-428)	AA1	AA1_3	N	3
cF05639	GH10(35-319)	GH10	GH10	Y(1-20)	3
cF05648	CE4(151-281)	CE4	N	N	2
cF05679	GT90(708-991)	GT90	GT90	N	3
cF05695	GH72(20-328)	GH72	CBM43+GH72	Y(1-21)	3
cF05696	GT48(844-1625)	GT48	GT48	N	3
cF05709	GH16(72-226)	GH16	N	Y(1-24)	2
cF05718	GT15(93-363)	GT15	GT15	N	3
cF05719	AA3_2(34-601)	N	AA3_2	Y(1-18)	2
cF05753	GH47(70-543)	GH47	GH47	Y(1-18)	3
cF05806	GH5_49(117-421)	N	GH5_49	N	2
cF05808	GH5_5(32-310)	GH5	GH5_5	Y(1-27)	3
cF05818	GH3(179-393)	GH3	GH3	N	3
cF05844	GH132(118-434)	GH132	N	Y(1-20)	2
cF05860	GH47(74-564)	GH47	GH47	N	3
cF05882	PL3_2(43-229)	PL3	N	Y(1-21)	2
cF05885	AA1_3(73-383)	AA1	AA1_3	N	3
cF05917	GH125(71-493)	GH125	GH125	Y(1-17)	3
cF05981	AA7(65-287)	AA7	AA7	Y(1-22)	3
cF06059	PL1_7(84-265)	PL1	PL1_7	Y(1-21)	3
cF06078	AA6(4-201)	AA6	N	N	2
cF06117	GH16(61-344)	GH16	N	Y(1-47)	2
cF06126	GH89(65-659)	N	GH89	Y(1-19)	2
cF06149	GH17(24-305)	GH17	GH17	Y(1-20)	3
cF06215	GH92(261-759)	GH92	GH92	Y(1-28)	3
cF06357	GH3(118-340)	GH3	GH3	Y(1-22)	3
cF06358	GH92(276-786)	GH92	GH92	Y(1-25)	3
cF06399	PL4_5(31-413)	N	PL4_5	Y(1-19)	2
cF06463	GH128(46-271)	GH128	N	Y(1-21)	2
cF06492	GH76(29-399)	GH76	GH76	Y(1-20)	3
cF06499	AA11(70-157)	AA11	N	Y(1-31)	2
cF06542	GT57(15-420)	GT57	GT57	N	3
cF06554	GH76(31-401)	GH76	GH76	N	3
cF06606	GH31(210-671)	GH31	GH31	N	3
cF06613	GH43_24(42-285)+CBM35(332-455)	GH43	CBM35+GH43_24	Y(1-18)	3
cF06707	GH20(171-515)	GH20	GH20	Y(1-25)	3
cF06780	GH17(48-294)	GH17	N	Y(1-30)	2
cF06859	GH3(88-313)	GH3	GH3	N	3
cF06924	GH5_7(59-336)	GH5	CBM1+GH5_7	Y(1-21)	3
cF06925	AA9(6-218)	AA9	AA9	Y(1-20)	3
cF06987	GH53(31-370)	N	GH53	Y(1-21)	2
cF07023	GH35(50-381)	GH35	GH35	N	3
cF07049	GH5_9(83-387)	GH5	GH5_9	Y(1-21)	3
cF07090	GH3(115-341)	GH3	GH3	Y(1-20)	3
cF07250	GH29(337-706)	GH29	GH29	N	3
cF07251	PL3_2(59-248)	PL3	N	Y(1-29)	2
cF07339	CE16(42-336)	CE16	N	Y(1-21)	2
cF07374	AA1_3(1-308)	AA1	AA1_3	N	3
cF07375	GH76(26-304)	GH76	N	Y(1-29)	2
cF07497	GT4(201-341)	GT4	GT4	N	3
cF07645	GT39(1-156)	GT39	GT39	N	3
cF07683	GH92(263-772)	GH92	GH92	Y(1-59)	3
cF07684	GH28(65-375)	GH28	GH28	N	3
cF07702	GH5_12(15-258)+GH5_12(255-484)	GH5	GH5_12	N	3
cF07759	GH15(51-462)+CBM20(541-630)	GH15	CBM20+GH15	Y(1-22)	3
cF07770	GH18(34-266)	GH18	N	N	2
cF07789	GH37(52-625)	GH37	GH37	N	3
cF07842	GT35(160-875)	GT35	GT35	N	3
cF07870	GT15(78-358)	GT15	GT15	N	3
cF07876	GH55(30-761)	N	GH55	N	2
cF07914	CE5(59-227)	CE5	N	Y(1-21)	2
cF07927	GH31(375-604)+GH31(617-798)	GH31	GH31	Y(1-24)	3
cF07954	GT76(50-437)	GT76	N	N	2
cF07982	GH27(710-1048)	GH27	GH27	N	3
cF08009	GH3(33-245)	GH3	GH3	N	3
cF08041	AA11(14-187)	AA11	N	N	2
cF08044	GH72(25-323)	GH72	GH72	Y(1-20)	3
cF08086	AA3(29-708)	AA3	AA3_2	Y(1-21)	3
cF08131	GH55(157-896)	GH28+GH55	GH55	N	3
cF08180	GH76(32-409)	GH76	N	Y(1-27)	2
cF08238	GH78(216-574)	GH78	GH78	N	3
cF08497	GH76(45-424)	GH76	GH76	Y(1-46)	3
cF08511	GH38(278-537)	GH38	GH38	N	3
cF08515	AA1_3(59-371)	AA1	AA1_3	Y(1-39)	3
cF08567	GT1(88-480)	GT1	GT1	N	3
cF08606	GH78(407-770)	GH78	GH78	Y(1-24)	3
cF08609	GH81(28-709)	GH81	GH81	N	3
cF08663	GT39(65-303)	GT39	GT39	N	3
cF08675	GH17(232-500)	GH17	GH17	N	3
cF08732	GH12(99-246)	GH12	N	Y(1-29)	2
cF08734	AA9(8-220)	AA9	N	Y(1-26)	2
cF08795	GT90(560-822)	GT90	N	N	2
cF08810	GH1(116-582)	N	GH1	Y(1-25)	2
cF08835	CBM21(310-417)	CBM21	CBM21	N	3
cF08844	GT22(23-183)+GT22(202-405)	GT22	GT22	N	3
cF08933	AA8(2-778)	AA3+AA8	AA3_1+AA8	Y(1-26)	3
cF08973	GH5_9(505-831)	GH5	GH5_9	N	3
cF08991	AA1_2(38-374)	AA1	AA1_2	Y(1-18)	3
cF09017	GT69(109-391)	GT69	GT69	N	3
cF09032	GT20(8-477)	GT20	GT20	N	3
cF09047	AA9(1-120)	AA9	N	N	2
cF09050	AA3_2(51-614)	N	AA3_2	N	2
cF09072	GH92(248-732)	GH92	GH92	Y(1-16)	3
cF09083	GT2(870-956)	GT2	GT2	N	3
cF09118	GH79(2-325)	N	GH79	N	2
cF09120	GT4(382-537)	GT4	GT4	N	3
cF09174	GT59(32-502)	GT59	GT59	N	3
cF09189	GH43_26(2-249)	GH43	N	N	2
cF09194	GH79(44-500)	N	GH79	Y(1-22)	2
cF09263	GH63(603-811)	GH63	GH63	Y(1-42)	3
cF09288	AA3_2(21-620)	AA3+AA8	AA3_2	N	3
cF09304	AA3_2(53-616)	AA3+AA8	AA3_2	N	3
cF09307	AA3(38-678)	AA3+AA8	AA3	Y(1-20)	3
cF09373	GH32(52-348)	GH32	GH32	Y(1-28)	3
cF09391	GH47(120-612)	GH47	GH47	Y(1-36)	3
cF09433	AA1_2(36-368)	AA1	AA1_2	N	3
cF09491	GH1(60-527)	GH1	GH1	N	3
cF09494	AA7(462-671)	AA7	AA7+CBM18	N	3
cF09498	GH28(60-376)	GH28	GH28	Y(1-25)	3
cF09622	GT32(75-156)	GT32	GT32	N	3
cF09633	GH47(118-619)	GH47	GH47	N	3
cF09762	GH31(331-879)	GH31	GH31	Y(1-26)	3
cF09927	GH47(45-507)	GH47	GH47	N	3
cF09928	GT90(586-852)	GT90	N	N	2
cF09941	GH125(116-548)	GH125	GH125	Y(1-37)	3
cF09978	CE5(2-152)	CE5	N	N	2
cF09789	N	GH0	GH0	N	2
cF01154	N	GH16	GH16	N	2
cF01982	N	GH36	GH36	N	2
cF00050	N	GH51	GH51	Y(1-20)	2
cF04054	N	GT0	GT0	N	2
cF05579	N	GT0	GT0	N	2
cF08546	N	GT0	GT0	N	2
cF05938	N	GT2	GT2	N	2
cF07828	N	GT2	GT2	N	2
cF07827	N	GT2	GT2	N	2
cF04071	N	GT2	GT2	N	2
cF08528	N	GT2	GT2	N	2
cF06607	N	GT8	GT8	N	2
cF00534	N	GT41	GT41	N	2

## Sheet: S2
TableS2-Identification of the CAZymes in P. citricarpa
Gene ID	HMMER	Hotpep	DIAMOND	Signalp	#ofTools
tF00065	GH3(91-309)	GH3	GH3	Y(1-21)	3
tF00087	GH13_5(41-381)	GH13	GH13_5	N	3
tF00096	AA11(30-173)	AA11	N	Y(1-32)	2
tF00107	GT69(60-314)	GT69	GT69	N	3
tF00139	AA9(32-194)	AA9	N	Y(1-21)	2
tF00199	AA3_2(6-616)	AA3+AA8	AA3_2	N	3
tF00218	GH1(90-560)	GH1	GH1	Y(1-23)	3
tF00221	CE8(30-224)	CE8	N	Y(1-26)	2
tF00244	GH32(29-279)	N	GH32	N	2
tF00245	GH1(98-565)	N	GH1	N	2
tF00268	GH1(122-593)	N	GH1	Y(1-35)	2
tF00300	GT8(78-320)	GT8	GT8	N	3
tF00302	GH31(210-663)	GH31	GH31	N	3
tF00368	AA3_2(21-561)	AA3	AA3_2	N	3
tF00395	GH105(50-375)	GH105	GH105	N	3
tF00460	GT2(787-873)	GT2	GT2	N	3
tF00470	AA1_3(1-277)	AA1	AA1_3+CBM18	N	3
tF00481	GH5_9(83-383)	GH5	GH5_9	N	3
tF00569	GH3(133-346)	GH3	GH3	N	3
tF00580	GH79(44-509)	N	GH79	Y(1-22)	2
tF00637	AA1_3(72-374)	AA1	AA1_3	Y(1-29)	3
tF00672	GH32(51-305)	GH32	GH32	Y(1-22)	3
tF00795	AA7(53-485)	N	AA7	Y(1-20)	2
tF00799	AA3(30-665)	AA3	AA3	N	3
tF00840	GH37(146-704)	GH37	GH37	N	3
tF00849	GH43_26(45-367)	N	GH43_26	Y(1-18)	2
tF00952	GH92(254-616)	GH92	GH92	Y(1-18)	3
tF00973	GH3(119-265)	GH3	GH3	N	3
tF00988	GT2(9-179)	GT2	GT2	N	3
tF01076	AA3_1(30-562)	N	AA3_1	Y(1-19)	2
tF01081	GT90(314-614)	GT90	GT90	N	3
tF01132	GH17(49-295)	GH17	N	Y(1-21)	2
tF01172	GH7(2-436)	GH7	GH7	N	3
tF01198	GT39(58-303)	GT39	GT39	N	3
tF01223	GT1(323-630)	GT1	GT1	N	3
tF01232	GH28(42-364)	GH28	GH28	Y(1-38)	3
tF01255	GH31(270-778)	GH31	GH31	Y(1-27)	3
tF01272	GH3(118-344)	GH3	GH3	Y(1-23)	3
tF01295	GH31(256-701)	GH31	GH31	N	3
tF01343	AA7(55-286)	N	AA7	Y(1-26)	2
tF01367	GH20(171-418)	GH20	GH20	N	3
tF01385	GH13_25(1078-1496)	GH133	GH133+GH13_25	N	3
tF01447	AA9(9-235)	AA9	N	Y(1-30)	2
tF01483	GH47(74-349)	GH47	GH47	N	3
tF01514	AA1_3(89-428)	AA1	AA1_3	N	3
tF01530	GT15(78-358)	GT15	GT15	N	3
tF01571	GH47(70-526)	GH47	GH47	Y(1-34)	3
tF01588	GT32(134-212)	GT32	GT32	Y(1-29)	3
tF01597	GH132(110-428)	GH132	N	Y(1-20)	2
tF01642	GT34(169-450)	GT34	GT34	N	3
tF01699	GH6(187-352)	GH6	N	N	2
tF01744	GT57(15-488)	GT57	GT57	N	3
tF01802	GH47(120-612)	GH47	GH47	N	3
tF01833	GT34(69-298)	GT34	N	N	2
tF01887	GH15(62-516)	GH15	GH15	N	3
tF02132	GH76(119-519)	GH76	GH76	Y(1-37)	3
tF02161	GT59(32-519)	GT59	GT59	N	3
tF02194	GH10(31-341)	GH10	GH10	Y(1-20)	3
tF02204	AA9(67-180)	AA9	N	Y(1-26)	2
tF02208	GH12(99-246)	GH12	N	Y(1-19)	2
tF02248	AA5_1(351-609)+AA5_1(610-833)	AA5	AA5+CBM18	Y(1-18)	3
tF02283	GT62(66-329)	GT62	GT62	N	3
tF02286	GH72(19-334)	GH72	GH72	Y(1-20)	3
tF02334	CE4(669-784)	N	CE4	Y(1-23)	2
tF02336	AA7(63-508)	AA7	AA7+CBM18	Y(1-26)	3
tF02343	AA1_2(43-380)	AA1	AA1_2	Y(1-23)	3
tF02380	CE9(1-156)	CE9	N	N	2
tF02383	GH3(2-119)	N	GH3	N	2
tF02401	GH31(231-700)	GH31	GH31	N	3
tF02430	GH105(11-378)	GH105	N	N	2
tF02432	GH18(30-288)	GH18	N	Y(1-21)	2
tF02462	GT21(77-388)	GT21	GT21	N	3
tF02534	AA3_2(53-636)	AA3+AA8	AA3_2	N	3
tF02546	GH89(65-715)	N	GH89	Y(1-55)	2
tF02551	GH16(61-345)	GH16	N	Y(1-47)	2
tF02611	AA9(6-238)	AA9	N	Y(1-21)	2
tF02617	GH71(76-461)	GH71	CBM24+GH71	N	3
tF02656	GT2(120-297)	N	GT2	N	2
tF02682	GT8(2-211)	GT8	GT8	N	3
tF02694	GH92(315-861)	GH92	GH92	N	3
tF02707	GH16(72-234)	GH16	N	Y(1-27)	2
tF02730	GT15(119-429)	GT15	GT15	N	3
tF03047	GT35(158-856)	GT35	GT35	N	3
tF03055	PL4_1(19-524)	PL4	PL4_1	Y(1-22)	3
tF03100	GH43_26(24-307)	GH43	GH43_26	Y(1-22)	3
tF03155	GH115(5-530)	GH115	GH115	N	3
tF03182	GH35(50-381)	GH35	GH35	Y(1-25)	3
tF03190	PL1_7(84-265)	PL1	PL1_7	Y(1-21)	3
tF03203	GT15(93-363)	GT15	GT15	N	3
tF03292	AA1_3(84-395)	AA1	AA1_3	Y(1-20)	3
tF03298	GH43_6(6-250)	GH43	GH43_6	N	3
tF03320	CE8(45-316)	CE8	CE8	Y(1-20)	3
tF03321	GH28(59-376)	GH28	GH28	Y(1-19)	3
tF03430	GT22(22-445)	GT22	GT22	N	3
tF03439	AA11(21-109)+AA11(110-184)	AA11	N	Y(1-21)	2
tF03462	GH3(84-302)	GH3	GH3	Y(1-24)	3
tF03484	AA5(689-1190)	AA5	AA5_1	N	3
tF03534	GH31(375-821)	GH31	GH31	Y(1-24)	3
tF03565	AA7(89-301)	N	AA7	N	2
tF03589	AA1_2(37-374)	AA1	AA1_2	Y(1-18)	3
tF03618	GH38(261-518)	GH38	GH38	N	3
tF03660	CE5(127-211)	CE5	N	Y(1-20)	2
tF03721	AA3(1-423)	N	AA3_2	N	2
tF03741	AA9(6-229)	AA9	N	Y(1-20)	2
tF03762	GH47(232-734)	GH47	GH47	N	3
tF03802	AA1_3(72-398)	AA1	AA1_3	N	3
tF03811	GH47(44-470)	GH47	GH47	N	3
tF03873	AA9(6-227)	AA9	N	N	2
tF03965	GH78(43-600)	GH78	GH78	N	3
tF03985	GH16(82-226)	GH16	N	Y(1-24)	2
tF04099	GH43_13(4-291)	GH43	GH43_13	N	3
tF04118	GH5_5(32-310)	GH5	GH5_5	Y(1-18)	3
tF04171	AA3_2(2-213)	AA3	N	N	2
tF04190	GH76(44-365)	GH76	GH76	Y(1-39)	3
tF04201	GH72(25-324)	GH72	GH72	Y(1-20)	3
tF04247	GH79(41-362)	N	GH79	N	2
tF04248	GT4(382-542)	GT4	GT4	N	3
tF04353	GH16(151-474)	GH16	GH16	N	3
tF04442	GH1(96-476)	GH1	GH1	N	3
tF04450	GH131(22-258)	GH131	N	Y(1-19)	2
tF04502	AA1_3(1-305)	AA1	AA1_3	N	3
tF04539	AA3(11-537)	AA3	AA3_2	N	3
tF04562	AA6(4-200)	AA6	N	N	2
tF04570	PL3_2(42-228)	PL3	N	Y(1-21)	2
tF04594	GH18(31-398)	GH18	N	Y(1-23)	2
tF04627	GT39(58-303)	GT39	GT39	N	3
tF04661	GH3(2-85)	GH3	GH3	N	3
tF04678	AA3_2(56-631)	AA3+AA8	AA3_2	Y(1-17)	3
tF04683	AA7(104-350)	AA7	AA7	N	3
tF04778	GH92(266-775)	GH92	GH92	Y(1-26)	3
tF04787	GH17(337-606)	GH17	GH17	N	3
tF04828	AA4(6-566)	AA4	AA4	N	3
tF04841	GH17(37-308)	GH17	N	Y(1-21)	2
tF04909	GH63(564-772)	GH63	GH63	Y(1-21)	3
tF04990	PL4_5(34-547)	N	PL4_5	Y(1-40)	2
tF05007	GH28(80-431)	GH28	GH28	Y(1-21)	3
tF05113	AA9(7-216)	AA9	N	Y(1-19)	2
tF05118	GH20(160-496)	N	GH20	Y(1-27)	2
tF05146	GT22(9-408)	GT22	GT22	N	3
tF05148	GH16(37-267)	GH16	N	N	2
tF05221	GH18(315-694)	GH18	GH18	N	3
tF05235	GH72(19-299)	GH72	GH72	Y(1-22)	3
tF05292	GH28(61-385)	GH28	GH28	Y(1-25)	3
tF05316	GT33(1-389)	GT33	GT33	N	3
tF05347	AA1_3(161-476)	AA1	AA1_3	Y(1-49)	3
tF05348	GH16(46-226)	GH16	N	Y(1-21)	2
tF05441	GH5_4(70-340)	GH5	CBM1+GH5_4	N	3
tF05590	AA7(59-521)	AA7	AA7	N	3
tF05633	GT22(19-449)	GT22	GT22	N	3
tF05671	AA1_3(70-381)	AA1	AA1_3	Y(1-19)	3
tF05684	CBM21(312-419)	CBM21	CBM21	N	3
tF05738	GT48(887-1290)	GT48	GT48	N	3
tF05739	GT48(1-366)	GT48	GT48	N	3
tF05749	GH47(17-533)	GH47	GH47	N	3
tF05821	AA11(22-205)	AA11	N	Y(1-20)	2
tF05852	PL1_4(115-301)	PL1	PL1_4	Y(1-25)	3
tF05880	PL3_2(27-195)	PL3	N	N	2
tF05882	CE8(60-376)	CE8	CE8	Y(1-27)	3
tF05976	GT20(8-477)	GT20	GT20	N	3
tF06011	GT2(113-349)	GT2	GT2	N	3
tF06084	GH3(74-325)	GH3	GH3	N	3
tF06182	GH18(42-370)	GH18	GH18	N	3
tF06249	GT90(711-983)	GT90	GT90	N	3
tF06278	GT4(211-356)	GT4	GT4	N	3
tF06301	GH76(29-398)	GH76	GH76	Y(1-20)	3
tF06358	AA3_2(566-1097)	AA3	AA3_2	N	3
tF06426	GH55(51-511)	GH55	GH55	Y(1-23)	3
tF06449	GH5_12(15-549)	GH5	GH5_12	N	3
tF06460	GT50(132-403)	GT50	GT50	N	3
tF06504	GH37(53-627)	GH37	GH37	Y(1-23)	3
tF06538	GT2(244-421)	N	GT2	N	2
tF06561	GH16(70-337)	GH16	GH16	N	3
tF06564	GH13_8(246-539)	GH13+CBM48	CBM48+GH13_8	N	3
tF06605	GT2(1237-1322)	GT2	GT2	N	3
tF06618	GH5_9(83-387)	GH5	GH5_9	Y(1-21)	3
tF06647	GH81(28-709)	GH81	GH81	N	3
tF06650	GH78(409-823)	GH78	GH78	Y(1-27)	3
tF06720	AA11(8-187)	AA11	N	N	2
tF06729	GH35(35-369)	GH35	GH35	Y(1-21)	3
tF06744	GH51(7-416)	GH51	GH51	N	3
tF06781	GT76(56-437)	GT76	N	N	2
tF06804	GH16(280-608)	GH16	GH16	N	3
tF06866	GH125(115-547)	GH125	GH125	Y(1-36)	3
tF06897	GT58(482-821)	GT58	GT58	N	3
tF06939	GT90(584-852)	GT90	N	N	2
tF06965	AA3(26-703)	AA3	AA3_2	Y(1-18)	3
tF07048	GH92(287-797)	GH92	GH92	Y(1-25)	3
tF07049	GH3(63-287)	GH3	GH3	N	3
tF07081	GH16(71-188)	GH16	N	N	2
tF07131	GH18(43-268)	GH18	N	N	2
tF07145	GH16(128-451)	GH16	GH16	N	3
tF07190	GH3(90-311)	GH3	GH3	Y(1-30)	3
tF07245	GH15(51-462)+CBM20(542-631)	GH15	CBM20+GH15	N	3
tF07289	AA3_1(6-666)	AA3	AA3_1+AA8	Y(1-26)	3
tF07309	GT8(20-292)	GT8	GT8	N	3
tF07334	AA3_3(5-599)	AA3	AA3_3	N	3
tF07350	GH142(42-533)	N	GH142	N	2
tF07416	AA8(9-800)	AA3+AA8	AA3_1+AA8+CBM1	Y(1-22)	3
tF07530	GH5_9(236-561)	GH5	GH5_9	N	3
tF07539	GT20(167-621)	GT20	GT20	N	3
tF07642	GH72(20-328)+CBM43(380-468)	GH72	CBM43+GH72	Y(1-21)	3
tF07717	GT62(100-365)	GT62	GT62	N	3
tF07732	GH31(324-798)	N	GH31	Y(1-24)	2
tF07749	GH43_24(42-283)+CBM35(332-455)	GH43	CBM35+GH43_24	Y(1-18)	3
tF07822	CE12(35-247)	CE12	N	Y(1-21)	2
tF07940	GH31(330-877)	GH31	GH31	Y(1-64)	3
tF07941	GH64(60-426)	GH64	CBM6+GH64	Y(1-43)	3
tF07948	GH29(325-693)	GH29	GH29	Y(1-19)	3
tF07949	PL3_2(59-248)	PL3	N	Y(1-24)	2
tF07974	GH3(213-427)	GH3	GH3	N	3
tF08005	GT32(75-156)	GT32	GT32	N	3
tF08013	GH2(8-725)	GH2	GH2	N	3
tF08020	GT3(16-652)	GT3	GT3	N	3
tF08097	GH92(291-806)	GH92	GH92	Y(1-33)	3
tF08207	CE12(39-228)	CE12	N	Y(1-20)	2
tF08209	GH47(104-590)	GH47	GH47	N	3
tF08239	GH3(88-313)	GH3	GH3	N	3
tF08275	GH28(67-374)	GH28	GH28	Y(1-21)	3
tF08280	GH55(253-734)	N	GH55	N	2
tF08286	GH125(71-493)	GH125	GH125	N	3
tF08303	GT22(5-385)	GT22	GT22	N	3
tF08361	GH16(52-247)	GH16	N	Y(1-24)	2
tF08372	GH76(1-355)	GH76	GH76	N	3
tF08457	GT4(473-644)	N	GT4	N	2
tF08466	GH5_7(59-336)	GH5	CBM1+GH5_7	Y(1-27)	3
tF08467	AA9(6-218)	AA9	N	Y(1-20)	2
tF08512	GT69(148-430)	GT69	GT69	N	3
tF08545	AA3_2(25-587)	AA3	AA3_2	Y(1-19)	3
tF08548	PL1_2(74-249)	CE8+PL1	PL1_2	N	3
tF08549	GH2(15-551)	GH2	GH2	N	3
tF08590	GH27(33-370)	GH27	GH27	Y(1-21)	3
tF08604	GT20(273-686)	GT20	GT20	N	3
tF08607	CE4(150-279)	CE4+CBM18	N	Y(1-21)	2
tF08634	GT66(24-675)	GT66	GT66	N	3
tF08649	GH106(109-1087)	N	GH0	N	2
tF08654	GT57(69-565)	GT57	GT57	N	3
tF08695	GT4(219-386)	GT4	GT4	N	3
tF08708	GH47(247-1019)	GH47	GH47	Y(1-33)	3
tF08825	GH13_1(57-277)	N	GH13_1	Y(1-19)	2
tF08836	GH3(32-245)	GH3	GH3	N	3
tF08842	GH47(1-452)	GH47	GH47	N	3
tF08850	GH92(256-758)	GH92	GH92	Y(1-24)	3
tF08855	GT62(72-336)	GT62	GT62	N	3
tF08859	GH128(48-157)+GH128(157-259)	GH128	N	N	2
tF08864	GT39(66-304)	GT39	GT39	N	3
tF08870	GT24(1205-1452)	GT24	GT24	N	3
tF08886	GH2(42-763)	GH2	GH2	N	3
tF08914	AA1_2(34-369)	AA1	N	N	2
tF08939	GT1(964-1377)	GT1	GT1	N	3
tF09004	GH78(245-611)	GH78	GH78	N	3
tF09069	AA1_3(73-383)	AA1	AA1_3	Y(1-21)	3
tF05373	N	GH0	GH0	N	2
tF03751	N	GH17	GH17	Y(1-27)	2
tF01948	N	GH36	GH36	N	2
tF01738	N	GH51	GH51	Y(1-23)	2
tF00078	N	AA3+AA8	AA3	N	2
tF03581	N	GT0	GT0	N	2
tF04352	N	GT0	GT0	N	2
tF02859	N	GT0	GT0	N	2
tF00049	N	GT2	GT2	N	2
tF08631	N	GT2	GT2	N	2
tF04055	N	GT2	GT2	N	2
tF03048	N	GT2	GT2	N	2
tF05582	N	GT41	GT41	N	2

## Sheet: S3
TableS3-Identification of the CAZymes in P. citriasiana
Gene ID	HMMER	Hotpep	DIAMOND	Signalp	#ofTools
pZ00001	AA7(55-286)	N	AA7	N	2
pZ00030	AA9(6-229)	AA9	N	Y(1-20)	2
pZ00071	GH63(603-811)	GH63	GH63	Y(1-39)	3
pZ00246	GH3(134-347)	GH3	GH3	N	3
pZ00276	GH92(291-806)	GH92	GH92	Y(1-33)	3
pZ00300	GT2(113-305)	GT2	GT2	N	3
pZ00329	GH5_9(83-387)	GH5	GH5_9	Y(1-21)	3
pZ00377	GH16(151-474)	GH16	GH16	N	3
pZ00427	GH31(231-529)	GH31	GH31	N	3
pZ00488	GH47(70-543)	GH47	GH47	Y(1-18)	3
pZ00499	AA9(6-227)	AA9	N	N	2
pZ00555	GT4(219-386)	GT4	GT4	N	3
pZ00562	GH92(254-760)	GH92	GH92	Y(1-18)	3
pZ00588	GT15(93-363)	GT15	GT15	N	3
pZ00592	AA3_2(91-659)	N	AA3_2	N	2
pZ00601	GH16(82-226)	GH16	N	Y(1-24)	2
pZ00605	GH125(115-547)	GH125	GH125	Y(1-36)	3
pZ00644	GH72(19-334)	GH72	GH72	Y(1-20)	3
pZ00647	GT62(86-349)	GT62	GT62	N	3
pZ00674	GH15(62-516)	GH15	GH15	Y(1-27)	3
pZ00786	GT58(22-381)	GT58	GT58	N	3
pZ00869	GH76(29-398)	GH76	GH76	Y(1-20)	3
pZ00875	AA1_3(89-428)	AA1	AA1_3	N	3
pZ00889	GH47(17-533)	GH47	GH47	N	3
pZ00912	GH12(125-269)	GH12	N	Y(1-21)	2
pZ00920	GH16(128-278)	GH16+CBM18	CBM18+GH16	Y(1-27)	3
pZ00925	GH28(80-431)	GH28	GH28	Y(1-21)	3
pZ00982	GH79(44-507)	N	GH79	Y(1-22)	2
pZ01025	GH1(98-573)	N	GH1	N	2
pZ01061	GH5_5(32-310)	GH5	GH5_5	Y(1-18)	3
pZ01075	GH31(324-798)	N	GH31	Y(1-24)	2
pZ01113	GH35(50-381)	GH35	GH35	Y(1-25)	3
pZ01164	GH78(245-628)	GH78	GH78	N	3
pZ01184	GH16(128-451)	GH16	GH16	N	3
pZ01271	AA1_3(71-374)	AA1	AA1_3	Y(1-29)	3
pZ01331	GH17(36-308)	GH17	N	Y(1-21)	2
pZ01343	AA11(22-205)	AA11	N	Y(1-22)	2
pZ01373	CE4(150-279)	CE4+CBM18	CBM18+CE4	Y(1-21)	3
pZ01427	CE12(35-245)	CE12	N	Y(1-21)	2
pZ01441	AA9(9-228)	AA9	N	Y(1-21)	2
pZ01553	GH132(110-428)	GH132	N	Y(1-20)	2
pZ01557	GT62(72-336)	GT62	GT62	N	3
pZ01569	GH105(11-378)	GH105	N	N	2
pZ01588	GH2(15-551)	GH2	GH2	N	3
pZ01593	AA3_2(25-587)	AA3	AA3_2	Y(1-19)	3
pZ01595	GH18(31-424)	GH18	CBM18+GH18	Y(1-23)	3
pZ01725	GH37(53-627)	GH37	GH37	Y(1-23)	3
pZ01744	GH72(25-324)	GH72	GH72	Y(1-20)	3
pZ01834	AA1_3(70-381)	AA1	AA1_3	Y(1-19)	3
pZ01893	CE5(58-227)	CE5	N	Y(1-20)	2
pZ01931	GT1(306-613)	GT1	GT1	N	3
pZ01947	GH1(97-565)	GH1	GH1	N	3
pZ01961	GH5_9(83-383)	GH5	GH5_9	N	3
pZ02065	GH16(71-180)	GH16	N	N	2
pZ02104	GH3(88-313)	GH3	GH3	N	3
pZ02206	GH47(1-275)	GH47	N	N	2
pZ02208	CE12(39-228)	CE12	N	Y(1-20)	2
pZ02230	CBM21(295-402)	CBM21	CBM21	N	3
pZ02257	GT57(15-491)	GT57	GT57	N	3
pZ02284	GT69(150-432)	GT69	GT69	N	3
pZ02353	AA3_2(547-1130)	AA3	AA3_2	N	3
pZ02385	GH2(42-762)	GH2	GH2	N	3
pZ02398	GH17(48-294)	GH17	N	Y(1-30)	2
pZ02427	GT2(9-179)	GT2	GT2	N	3
pZ02514	GH28(60-385)	GH28	GH28	Y(1-25)	3
pZ02535	AA1_2(43-380)	AA1	AA1_2	Y(1-23)	3
pZ02541	AA7(63-508)	AA7	AA7+CBM18	Y(1-26)	3
pZ02543	CE4(563-678)	N	CE4	Y(1-23)	2
pZ02548	GT15(119-429)	GT15	GT15	N	3
pZ02588	GH92(287-797)	GH92	GH92	Y(1-25)	3
pZ02589	GH3(63-285)	GH3	GH3	N	3
pZ02688	AA9(6-238)	AA9	N	Y(1-21)	2
pZ02844	GT90(584-852)	GT90	N	N	2
pZ02845	GH47(44-507)	GH47	GH47	N	3
pZ02888	GH3(90-311)	GH3	GH3	Y(1-30)	3
pZ02950	GH5_49(117-421)	N	GH5_49	N	2
pZ03000	GT90(709-992)	GT90	GT90	N	3
pZ03002	GT8(5-224)	GT8	GT8	N	3
pZ03059	GH16(52-246)	GH16	N	Y(1-24)	2
pZ03073	GH89(65-605)	N	GH89	Y(1-55)	2
pZ03078	GH16(61-345)	GH16	N	Y(1-47)	2
pZ03115	GH76(44-419)	GH76	GH76	Y(1-39)	3
pZ03147	GH47(74-565)	GH47	GH47	N	3
pZ03271	GH5_12(15-549)	GH5	GH5_12	N	3
pZ03281	GH47(247-1020)	GH47	GH47	Y(1-33)	3
pZ03296	GH18(7-386)	GH18	GH18	N	3
pZ03461	GH47(128-623)	GH47	GH47	N	3
pZ03473	GH72(20-328)+CBM43(380-468)	GH72	CBM43+GH72	Y(1-21)	3
pZ03474	GT48(840-1620)	GT48	GT48	N	3
pZ03500	GH142(42-533)	N	GH142	N	2
pZ03518	GT39(81-326)	GT39	GT39	Y(1-28)	3
pZ03569	GT22(9-408)	GT22	GT22	N	3
pZ03571	GH16(47-320)	GH16	N	Y(1-25)	2
pZ03583	GT34(167-448)	GT34	GT34	N	3
pZ03607	GH38(278-535)	GH38	GH38	N	3
pZ03699	GT4(382-542)	GT4	GT4	N	3
pZ03700	GH79(41-362)	N	GH79	N	2
pZ03726	GH47(232-734)	GH47	GH47	N	3
pZ03936	GH16(116-316)	N	GH16	N	2
pZ04062	GH12(99-246)	GH12	N	Y(1-19)	2
pZ04067	AA9(8-218)	AA9	N	Y(1-26)	2
pZ04133	GH32(51-347)	GH32	GH32	Y(1-22)	3
pZ04167	GT3(16-652)	GT3	GT3	N	3
pZ04170	AA11(21-210)	AA11	N	Y(1-21)	2
pZ04205	GH43_13(4-305)	GH43	GH43_13	N	3
pZ04244	AA8(9-802)	AA3+AA8	AA3_1+AA8+CBM1	Y(1-22)	3
pZ04266	GH1(122-593)	N	GH1	Y(1-35)	2
pZ04287	GT21(116-427)	GT21	GT21	N	3
pZ04293	GH31(375-821)	GH31	GH31	Y(1-24)	3
pZ04314	GT8(20-292)	GT8	GT8	N	3
pZ04338	GH31(359-906)	GH31	GH31	N	3
pZ04340	GH64(60-426)	GH64	CBM6+GH64	Y(1-58)	3
pZ04395	GH3(61-268)	GH3	GH3	Y(1-27)	3
pZ04434	GH105(50-375)	GH105	GH105	N	3
pZ04483	PL4_1(19-524)	PL4	PL4_1	Y(1-22)	3
pZ04506	CE8(3-291)	CE8	N	N	2
pZ04508	GH93(2-251)	GH93	N	N	2
pZ04558	GH92(256-758)	GH92	GH92	Y(1-24)	3
pZ04560	GH3(84-302)	GH3	GH3	Y(1-24)	3
pZ04578	GH31(256-701)	GH31	GH31	N	3
pZ04591	GH53(31-376)	N	GH53	N	2
pZ04607	GH31(270-794)	GH31	GH31	Y(1-27)	3
pZ04618	GT25(60-311)	GT25	GT25	N	3
pZ04624	GH3(118-344)	GH3	GH3	Y(1-23)	3
pZ04674	GT34(69-298)	GT34	N	N	2
pZ04828	AA1_3(73-383)	AA1	AA1_3	Y(1-21)	3
pZ04911	AA3(11-537)	AA3	AA3_2	N	3
pZ04922	GH16(119-382)	GH16	GH16	N	3
pZ04925	GH13_8(246-539)	GH13+CBM48	CBM48+GH13_8	N	3
pZ04949	GH3(78-303)	N	GH3	N	2
pZ04950	CE9(19-412)	CE9	CE9	N	3
pZ05042	AA1_3(1-309)	AA1	AA1_3	N	3
pZ05058	AA3(26-713)	AA3	AA3_2	Y(1-18)	3
pZ05074	GH3(74-329)	GH3	GH3	N	3
pZ05080	GH18(30-287)	GH18	N	Y(1-21)	2
pZ05130	GH43_26(45-366)	N	GH43_26	Y(1-18)	2
pZ05179	AA3_3(5-640)	AA3	AA3_3	N	3
pZ05229	GH47(120-612)	GH47	GH47	N	3
pZ05244	GT22(22-445)	GT22	GT22	N	3
pZ05292	GT1(925-1338)	GT1	GT1	N	3
pZ05333	GH6(82-375)	GH6	CBM1+GH6	N	3
pZ05373	GT20(92-625)	GT20	GT20	N	3
pZ05374	AA4(16-536)	AA4	AA4	N	3
pZ05410	GT35(158-873)	GT35	GT35	N	3
pZ05588	AA9(7-217)	AA9	N	Y(1-19)	2
pZ05594	GH20(160-496)	N	GH20	Y(1-27)	2
pZ05631	GH92(333-879)	GH92	GH92	N	3
pZ05836	GT59(32-522)	GT59	GT59	N	3
pZ05902	AA3_2(21-620)	AA3+AA8	AA3_2	N	3
pZ05963	AA1_3(72-398)	AA1	AA1_3	N	3
pZ05979	GH28(42-364)	GH28	GH28	Y(1-38)	3
pZ06024	PL3_2(59-248)	PL3	N	Y(1-24)	2
pZ06025	GH29(325-693)	GH29	GH29	Y(1-19)	3
pZ06049	AA1_3(195-512)	AA1	AA1_3+CBM18	N	3
pZ06127	GH55(137-876)	GH55	GH55	N	3
pZ06133	AA11(30-185)	AA11	N	Y(1-32)	2
pZ06144	GT69(60-314)	GT69	GT69	N	3
pZ06161	GH18(43-268)	GH18	N	N	2
pZ06170	GH92(266-775)	GH92	GH92	Y(1-26)	3
pZ06220	GT39(58-303)	GT39	GT39	N	3
pZ06235	GH10(31-341)	GH10	GH10	Y(1-20)	3
pZ06244	GT32(134-212)	GT32	GT32	Y(1-29)	3
pZ06248	CE1(47-249)	CE1	N	Y(1-24)	2
pZ06252	GH16(89-254)	GH16	N	Y(1-23)	2
pZ06259	AA3_1(30-562)	N	AA3_1	Y(1-19)	2
pZ06264	GT90(314-614)	GT90	GT90	N	3
pZ06320	GH16(47-227)	GH16	N	Y(1-21)	2
pZ06321	AA1_3(161-476)	AA1	AA1_3	Y(1-49)	3
pZ06377	AA8(3-781)	AA3	AA3_1+AA8	Y(1-26)	3
pZ06483	AA7(64-526)	AA7	AA7	Y(1-39)	3
pZ06518	GH7(2-436)	GH7	GH7	N	3
pZ06522	GH5_4(70-340)+CBM46(384-460)	GH5	CBM1+GH5_4	Y(1-27)	3
pZ06543	GH78(89-646)	GH78	GH78	N	3
pZ06554	GT22(19-232)	GT22	N	N	2
pZ06616	PL1_4(115-301)	PL1	PL1_4	Y(1-19)	3
pZ06736	GH125(71-480)	GH125	GH125	N	3
pZ06751	GT15(78-358)	GT15	GT15	N	3
pZ06752	GH28(67-374)	GH28	GH28	N	3
pZ06757	GH55(58-804)	N	GH55	Y(1-32)	2
pZ06773	AA1_2(34-367)	AA1	AA1_2	N	3
pZ06865	AA3_2(2-568)	AA3+AA8	AA3_2	N	3
pZ06870	GH37(146-704)	GH37	GH37	N	3
pZ06878	GH2(8-739)	GH2	GH2	N	3
pZ06888	GH13_1(57-361)	N	GH13_1	Y(1-19)	2
pZ06967	AA1_2(37-374)	AA1	AA1_2	Y(1-18)	3
pZ06981	GT32(75-156)	GT32	GT32	N	3
pZ07012	AA7(122-353)	AA7	AA7	N	3
pZ07018	AA3_2(56-631)	AA3+AA8	AA3_2	Y(1-17)	3
pZ07072	GT4(513-684)	N	GT4	N	2
pZ07095	GH13_25(1078-1530)	GH133	GH133+GH13_25	N	3
pZ07100	PL1_7(84-265)	PL1	PL1_7	Y(1-21)	3
pZ07173	AA7(89-301)	N	AA7	N	2
pZ07258	GH15(50-462)+CBM20(542-631)	GH15	CBM20+GH15	N	3
pZ07306	GH27(33-370)	GH27	GH27	Y(1-21)	3
pZ07321	AA5_1(351-872)	AA5	AA5+CBM18	Y(1-18)	3
pZ07458	GH20(171-515)	GH20	GH20	N	3
pZ07470	GT20(116-586)	GT20	GT20	N	3
pZ07484	GT24(1205-1452)	GT24	GT24	N	3
pZ07506	GH131(22-258)	GH131	N	Y(1-19)	2
pZ07528	GT22(16-412)	GT22	GT22	N	3
pZ07560	GH71(76-461)	GH71	CBM24+GH71	Y(1-55)	3
pZ07598	GH43_24(42-283)+CBM35(332-455)	GH43	CBM35+GH43_24	Y(1-18)	3
pZ07628	GH18(42-375)	GH18	GH18	N	3
pZ07686	AA6(4-200)	AA6	N	N	2
pZ07698	GT66(24-675)	GT66	GT66	N	3
pZ07748	AA9(9-235)	AA9	N	Y(1-30)	2
pZ07785	GT39(66-304)	GT39	GT39	N	3
pZ07803	AA11(29-218)	AA11	N	Y(1-29)	2
pZ07840	GH35(47-381)	GH35	GH35	N	3
pZ07887	GH72(19-299)	GH72	GH72	Y(1-22)	3
pZ07909	AA3(41-679)	AA3+AA8	AA3	Y(1-20)	3
pZ07922	GH3(91-309)	GH3	GH3	Y(1-21)	3
pZ07995	AA9(6-218)	AA9	N	Y(1-20)	2
pZ07996	GH5_7(59-336)	GH5	CBM1+GH5_7	Y(1-27)	3
pZ08067	CE8(45-314)	CE8	CE8	Y(1-20)	3
pZ08068	GH28(62-395)	GH28	GH28	Y(1-34)	3
pZ08195	GT2(249-426)	N	GT2	N	2
pZ08230	GT76(56-437)	GT76	N	N	2
pZ08260	GH17(56-285)	GH17	GH17	Y(1-27)	3
pZ08287	GH16(280-608)	GH16	GH16	N	3
pZ08294	GH51(8-426)	GH51	GH51	N	3
pZ08299	PL3_2(42-228)	PL3	N	Y(1-21)	2
pZ08348	GH78(400-840)	GH78	GH78	Y(1-27)	3
pZ08364	GH81(28-709)	GH81	GH81	N	3
pZ08501	GH3(77-295)	GH3	GH3	N	3
pZ08513	GT33(34-443)	GT33	GT33	N	3
pZ08526	GH128(45-273)	GH128	N	N	2
pZ08556	GH32(29-324)	N	GH32	N	2
pZ08576	GT8(78-320)	GT8	GT8	N	3
pZ08578	GH31(210-663)	GH31	GH31	N	3
pZ08600	AA7(53-485)	N	AA7	Y(1-20)	2
pZ08604	AA3(30-665)	AA3	AA3	N	3
pZ08661	GT2(244-421)	N	GT2	N	2
pZ08672	PL4_5(34-547)	N	PL4_5	Y(1-40)	2
pZ08712	GH3(32-245)	GH3	GH3	N	3
pZ08717	CE8(30-306)	CE8	N	Y(1-26)	2
pZ08720	GH1(90-559)	GH1	GH1	Y(1-23)	3
pZ08739	AA3_2(6-616)	AA3	AA3_2	N	3
pZ08756	GT4(211-356)	GT4	GT4	N	3
pZ08776	GT20(167-621)	GT20	GT20	N	3
pZ08798	GT57(69-565)	GT57	GT57	N	3
pZ08861	GH13_5(39-379)	GH13	GH13_5	N	3
pZ08885	GH5_9(510-835)	GH5	GH5_9	N	3
pZ08910	AA1_3(84-395)	AA1	AA1_3	Y(1-20)	3
pZ08916	GH43_6(33-319)	GH43	GH43_6	Y(1-22)	3
pZ08942	GH115(35-685)	GH115	GH115	N	3
pZ08990	GT50(132-403)	GT50	GT50	N	3
pZ09003	GH76(32-402)	GH76	GH76	Y(1-27)	3
pZ09040	GH17(337-606)	GH17	GH17	N	3
pZ09058	GT62(126-345)	GT62	GT62	N	3
pZ09078	GH43_26(24-307)	GH43	GH43_26	Y(1-22)	3
pZ09082	GH76(119-519)	GH76	GH76	Y(1-35)	3
pZ09136	GH106(246-882)	N	GH0	N	2
pZ09189	GT2(787-873)	GT2	GT2	N	3
pZ08319	N	GH0	GH0	N	2
pZ01041	N	GH3	GH3	N	2
pZ08217	N	GH36	GH36	N	2
pZ04059	N	GH51	GH51	Y(1-23)	2
pZ06959	N	GT0	GT0	N	2
pZ00376	N	GT0	GT0	N	2
pZ00769	N	GT0	GT0	N	2
pZ07937	N	GT2	GT2	N	2
pZ08054	N	GT2	GT2	N	2
pZ08055	N	GT2	GT2	N	2
pZ03171	N	GT2	GT2	N	2
pZ04007	N	GT2	GT2	N	2
pZ05385	N	GT41	GT41	N	2

## Sheet: S4
Tables4-statistical data of CAZymes in Phyllosticta species
	GH	AA	CE	PL	GT	CBM	total
P. capitalensis	145	49	11	7	62	1	275
P. citricarpa	134	50	9	8	62	1	264
P. citriasiana	140	48	10	6	62	1	267

## Sheet: S5
TableS5-List of the screted protein ids in three Phyllosticta species.
P. capitalensis	P. citriasiana	P. citricarpa
cF00060	pZ00001	tF00036
cF00109	pZ00010	tF00063
cF00124	pZ00024	tF00065
cF00133	pZ00026	tF00070
cF00156	pZ00030	tF00081
cF00162	pZ00124	tF00082
cF00167	pZ00161	tF00092
cF00217	pZ00164	tF00096
cF00268	pZ00182	tF00127
cF00269	pZ00246	tF00137
cF00315	pZ00247	tF00139
cF00329	pZ00257	tF00141
cF00332	pZ00276	tF00147
cF00354	pZ00308	tF00148
cF00369	pZ00329	tF00184
cF00407	pZ00349	tF00218
cF00410	pZ00375	tF00221
cF00416	pZ00408	tF00231
cF00490	pZ00410	tF00245
cF00505	pZ00421	tF00268
cF00506	pZ00488	tF00287
cF00555	pZ00499	tF00299
cF00564	pZ00507	tF00313
cF00596	pZ00534	tF00337
cF00624	pZ00562	tF00348
cF00629	pZ00567	tF00351
cF00665	pZ00601	tF00382
cF00677	pZ00605	tF00384
cF00679	pZ00632	tF00406
cF00691	pZ00639	tF00431
cF00705	pZ00649	tF00481
cF00716	pZ00660	tF00519
cF00728	pZ00799	tF00527
cF00745	pZ00823	tF00538
cF00749	pZ00826	tF00548
cF00761	pZ00874	tF00559
cF00768	pZ00875	tF00568
cF00776	pZ00887	tF00569
cF00781	pZ00893	tF00611
cF00810	pZ00894	tF00636
cF00820	pZ00896	tF00637
cF00826	pZ00908	tF00681
cF00837	pZ00912	tF00683
cF00854	pZ00925	tF00710
cF00889	pZ00927	tF00734
cF00902	pZ00958	tF00743
cF00904	pZ00973	tF00773
cF00914	pZ00990	tF00789
cF00934	pZ01007	tF00791
cF00972	pZ01011	tF00794
cF01038	pZ01019	tF00795
cF01039	pZ01025	tF00799
cF01063	pZ01049	tF00806
cF01077	pZ01080	tF00844
cF01078	pZ01089	tF00845
cF01079	pZ01105	tF00849
cF01088	pZ01109	tF00856
cF01094	pZ01113	tF00860
cF01098	pZ01164	tF00887
cF01160	pZ01190	tF00894
cF01196	pZ01195	tF00952
cF01214	pZ01207	tF00957
cF01256	pZ01271	tF01036
cF01262	pZ01272	tF01046
cF01284	pZ01275	tF01079
cF01366	pZ01288	tF01099
cF01371	pZ01303	tF01132
cF01374	pZ01323	tF01135
cF01394	pZ01331	tF01213
cF01420	pZ01343	tF01232
cF01423	pZ01345	tF01238
cF01446	pZ01413	tF01253
cF01448	pZ01427	tF01255
cF01485	pZ01441	tF01267
cF01503	pZ01503	tF01268
cF01513	pZ01516	tF01269
cF01541	pZ01570	tF01310
cF01574	pZ01572	tF01314
cF01651	pZ01587	tF01332
cF01661	pZ01589	tF01343
cF01682	pZ01593	tF01348
cF01732	pZ01610	tF01350
cF01802	pZ01629	tF01367
cF01803	pZ01644	tF01395
cF01820	pZ01654	tF01447
cF01842	pZ01660	tF01454
cF01852	pZ01662	tF01481
cF01913	pZ01671	tF01501
cF01950	pZ01687	tF01514
cF01974	pZ01707	tF01533
cF02013	pZ01725	tF01560
cF02021	pZ01740	tF01561
cF02025	pZ01764	tF01588
cF02068	pZ01791	tF01592
cF02084	pZ01809	tF01610
cF02086	pZ01831	tF01644
cF02132	pZ01834	tF01655
cF02154	pZ01835	tF01691
cF02188	pZ01860	tF01699
cF02197	pZ01869	tF01700
cF02204	pZ01891	tF01738
cF02213	pZ01892	tF01779
cF02227	pZ01893	tF01786
cF02246	pZ01901	tF01800
cF02265	pZ01908	tF01824
cF02298	pZ01961	tF01825
cF02341	pZ02003	tF01828
cF02347	pZ02018	tF01831
cF02374	pZ02048	tF01839
cF02393	pZ02056	tF01859
cF02399	pZ02063	tF01862
cF02447	pZ02065	tF01883
cF02465	pZ02080	tF01905
cF02489	pZ02084	tF01911
cF02501	pZ02101	tF01957
cF02505	pZ02104	tF02010
cF02537	pZ02107	tF02056
cF02571	pZ02126	tF02066
cF02584	pZ02136	tF02075
cF02585	pZ02155	tF02131
cF02587	pZ02162	tF02132
cF02589	pZ02180	tF02158
cF02606	pZ02188	tF02178
cF02613	pZ02189	tF02188
cF02656	pZ02208	tF02190
cF02662	pZ02229	tF02194
cF02674	pZ02239	tF02204
cF02704	pZ02245	tF02224
cF02742	pZ02285	tF02269
cF02774	pZ02301	tF02298
cF02775	pZ02355	tF02311
cF02780	pZ02364	tF02315
cF02791	pZ02376	tF02334
cF02792	pZ02398	tF02343
cF02794	pZ02513	tF02466
cF02842	pZ02515	tF02534
cF02857	pZ02525	tF02535
cF02869	pZ02535	tF02546
cF02881	pZ02543	tF02551
cF02902	pZ02588	tF02557
cF02911	pZ02660	tF02606
cF02918	pZ02666	tF02611
cF02922	pZ02688	tF02630
cF02929	pZ02845	tF02634
cF02930	pZ02872	tF02667
cF02985	pZ02875	tF02694
cF03026	pZ02888	tF02711
cF03044	pZ02929	tF02726
cF03083	pZ02945	tF02733
cF03085	pZ02963	tF02799
cF03114	pZ02967	tF02824
cF03148	pZ02968	tF02833
cF03171	pZ02981	tF02846
cF03197	pZ02984	tF02902
cF03199	pZ03031	tF02926
cF03203	pZ03061	tF02930
cF03204	pZ03073	tF02946
cF03223	pZ03078	tF02950
cF03233	pZ03084	tF02967
cF03253	pZ03093	tF03011
cF03258	pZ03098	tF03028
cF03259	pZ03122	tF03073
cF03264	pZ03128	tF03093
cF03282	pZ03172	tF03103
cF03315	pZ03178	tF03124
cF03336	pZ03179	tF03182
cF03377	pZ03182	tF03248
cF03416	pZ03215	tF03251
cF03425	pZ03248	tF03292
cF03448	pZ03256	tF03293
cF03452	pZ03281	tF03296
cF03453	pZ03302	tF03320
cF03481	pZ03402	tF03321
cF03483	pZ03482	tF03323
cF03492	pZ03560	tF03330
cF03515	pZ03585	tF03331
cF03532	pZ03589	tF03383
cF03543	pZ03647	tF03402
cF03553	pZ03664	tF03403
cF03554	pZ03681	tF03418
cF03565	pZ03701	tF03439
cF03566	pZ03733	tF03462
cF03585	pZ03803	tF03470
cF03587	pZ03819	tF03482
cF03602	pZ03825	tF03484
cF03621	pZ03826	tF03534
cF03627	pZ03835	tF03559
cF03635	pZ03854	tF03570
cF03639	pZ03874	tF03571
cF03674	pZ03879	tF03589
cF03683	pZ03899	tF03604
cF03728	pZ03908	tF03609
cF03743	pZ03912	tF03629
cF03757	pZ03924	tF03647
cF03787	pZ03934	tF03650
cF03791	pZ03941	tF03654
cF03836	pZ03952	tF03660
cF03839	pZ03971	tF03661
cF03850	pZ04014	tF03722
cF03870	pZ04019	tF03741
cF03897	pZ04036	tF03751
cF03900	pZ04059	tF03790
cF03919	pZ04067	tF03811
cF03924	pZ04075	tF03834
cF03948	pZ04102	tF03848
cF03949	pZ04115	tF03850
cF04010	pZ04140	tF03873
cF04026	pZ04141	tF03881
cF04034	pZ04143	tF03893
cF04043	pZ04170	tF03917
cF04077	pZ04235	tF03930
cF04080	pZ04244	tF03985
cF04105	pZ04259	tF03990
cF04137	pZ04266	tF04021
cF04138	pZ04281	tF04024
cF04140	pZ04291	tF04033
cF04150	pZ04293	tF04048
cF04152	pZ04298	tF04049
cF04153	pZ04318	tF04087
cF04166	pZ04366	tF04118
cF04170	pZ04385	tF04144
cF04184	pZ04395	tF04183
cF04203	pZ04415	tF04185
cF04208	pZ04422	tF04218
cF04211	pZ04446	tF04238
cF04255	pZ04503	tF04239
cF04274	pZ04504	tF04245
cF04286	pZ04527	tF04248
cF04308	pZ04531	tF04268
cF04309	pZ04532	tF04322
cF04310	pZ04547	tF04330
cF04327	pZ04560	tF04351
cF04409	pZ04591	tF04450
cF04418	pZ04605	tF04482
cF04430	pZ04607	tF04528
cF04493	pZ04619	tF04556
cF04506	pZ04621	tF04563
cF04509	pZ04634	tF04602
cF04592	pZ04641	tF04647
cF04601	pZ04667	tF04671
cF04604	pZ04676	tF04674
cF04651	pZ04679	tF04678
cF04683	pZ04682	tF04689
cF04719	pZ04699	tF04728
cF04732	pZ04715	tF04778
cF04828	pZ04721	tF04797
cF04891	pZ04743	tF04838
cF04899	pZ04754	tF04841
cF04906	pZ04802	tF04847
cF04929	pZ04807	tF04903
cF04940	pZ04826	tF04909
cF04952	pZ04828	tF04933
cF04993	pZ04878	tF04953
cF05029	pZ04881	tF04955
cF05030	pZ04905	tF04969
cF05035	pZ04918	tF05007
cF05072	pZ04972	tF05025
cF05104	pZ04990	tF05026
cF05107	pZ05002	tF05029
cF05118	pZ05007	tF05031
cF05119	pZ05021	tF05052
cF05145	pZ05023	tF05063
cF05158	pZ05027	tF05065
cF05174	pZ05029	tF05101
cF05180	pZ05058	tF05109
cF05195	pZ05130	tF05113
cF05236	pZ05157	tF05114
cF05247	pZ05227	tF05118
cF05365	pZ05236	tF05154
cF05366	pZ05284	tF05183
cF05412	pZ05289	tF05229
cF05418	pZ05303	tF05233
cF05443	pZ05332	tF05243
cF05456	pZ05333	tF05269
cF05459	pZ05438	tF05291
cF05485	pZ05439	tF05293
cF05500	pZ05446	tF05328
cF05527	pZ05447	tF05346
cF05528	pZ05471	tF05347
cF05539	pZ05510	tF05384
cF05558	pZ05557	tF05421
cF05582	pZ05588	tF05425
cF05600	pZ05590	tF05444
cF05610	pZ05591	tF05501
cF05620	pZ05594	tF05578
cF05622	pZ05595	tF05589
cF05624	pZ05599	tF05594
cF05639	pZ05600	tF05651
cF05650	pZ05606	tF05654
cF05651	pZ05631	tF05671
cF05682	pZ05656	tF05674
cF05700	pZ05664	tF05690
cF05709	pZ05683	tF05699
cF05719	pZ05688	tF05705
cF05723	pZ05717	tF05747
cF05753	pZ05718	tF05821
cF05782	pZ05722	tF05823
cF05783	pZ05754	tF05825
cF05787	pZ05777	tF05843
cF05808	pZ05781	tF05859
cF05852	pZ05792	tF05880
cF05884	pZ05807	tF05927
cF05894	pZ05839	tF05933
cF05917	pZ05851	tF05947
cF05942	pZ05854	tF05952
cF05953	pZ05891	tF05993
cF05981	pZ05917	tF06037
cF06029	pZ05977	tF06060
cF06071	pZ05979	tF06084
cF06085	pZ05986	tF06086
cF06098	pZ06005	tF06121
cF06106	pZ06024	tF06126
cF06113	pZ06025	tF06227
cF06117	pZ06049	tF06250
cF06119	pZ06054	tF06275
cF06126	pZ06079	tF06300
cF06142	pZ06118	tF06308
cF06149	pZ06131	tF06351
cF06176	pZ06133	tF06356
cF06197	pZ06188	tF06394
cF06201	pZ06235	tF06397
cF06215	pZ06248	tF06426
cF06243	pZ06275	tF06447
cF06246	pZ06286	tF06469
cF06251	pZ06291	tF06492
cF06281	pZ06308	tF06504
cF06283	pZ06321	tF06542
cF06293	pZ06322	tF06556
cF06342	pZ06377	tF06557
cF06355	pZ06398	tF06592
cF06357	pZ06411	tF06618
cF06391	pZ06419	tF06636
cF06399	pZ06449	tF06640
cF06421	pZ06459	tF06650
cF06499	pZ06466	tF06651
cF06535	pZ06471	tF06656
cF06613	pZ06479	tF06673
cF06629	pZ06483	tF06693
cF06648	pZ06484	tF06729
cF06675	pZ06489	tF06764
cF06705	pZ06493	tF06796
cF06707	pZ06508	tF06859
cF06736	pZ06525	tF06863
cF06780	pZ06547	tF06866
cF06798	pZ06550	tF06877
cF06831	pZ06551	tF06883
cF06832	pZ06574	tF06954
cF06859	pZ06608	tF06963
cF06894	pZ06617	tF06965
cF06917	pZ06624	tF06980
cF06924	pZ06654	tF07000
cF06925	pZ06682	tF07017
cF06933	pZ06712	tF07030
cF06957	pZ06736	tF07048
cF06965	pZ06745	tF07070
cF06980	pZ06748	tF07073
cF06987	pZ06752	tF07079
cF07001	pZ06764	tF07081
cF07023	pZ06773	tF07203
cF07030	pZ06815	tF07213
cF07033	pZ06836	tF07222
cF07049	pZ06860	tF07245
cF07069	pZ06866	tF07247
cF07090	pZ06888	tF07260
cF07158	pZ06905	tF07264
cF07192	pZ06910	tF07281
cF07209	pZ06925	tF07289
cF07213	pZ06931	tF07329
cF07251	pZ06960	tF07368
cF07264	pZ06967	tF07402
cF07267	pZ06987	tF07411
cF07282	pZ07006	tF07416
cF07298	pZ07018	tF07425
cF07312	pZ07022	tF07474
cF07334	pZ07062	tF07484
cF07339	pZ07108	tF07494
cF07368	pZ07168	tF07518
cF07375	pZ07180	tF07554
cF07477	pZ07183	tF07560
cF07495	pZ07239	tF07570
cF07522	pZ07258	tF07602
cF07538	pZ07265	tF07607
cF07563	pZ07271	tF07609
cF07600	pZ07302	tF07614
cF07608	pZ07306	tF07693
cF07672	pZ07314	tF07713
cF07684	pZ07411	tF07727
cF07759	pZ07438	tF07745
cF07789	pZ07443	tF07749
cF07798	pZ07458	tF07764
cF07806	pZ07479	tF07808
cF07845	pZ07487	tF07813
cF07853	pZ07493	tF07822
cF07867	pZ07506	tF07849
cF07890	pZ07559	tF07850
cF07897	pZ07564	tF07853
cF07906	pZ07570	tF07856
cF07907	pZ07590	tF07865
cF07914	pZ07598	tF07883
cF07917	pZ07625	tF07884
cF07927	pZ07630	tF07885
cF07996	pZ07640	tF07910
cF08011	pZ07748	tF07928
cF08049	pZ07755	tF07948
cF08062	pZ07780	tF07949
cF08086	pZ07805	tF07960
cF08100	pZ07835	tF07965
cF08126	pZ07840	tF07966
cF08135	pZ07878	tF08029
cF08170	pZ07906	tF08045
cF08172	pZ07907	tF08097
cF08173	pZ07909	tF08146
cF08203	pZ07917	tF08164
cF08226	pZ07922	tF08165
cF08230	pZ07995	tF08189
cF08241	pZ07996	tF08200
cF08328	pZ08030	tF08207
cF08344	pZ08067	tF08209
cF08345	pZ08068	tF08224
cF08346	pZ08071	tF08230
cF08349	pZ08078	tF08232
cF08377	pZ08087	tF08239
cF08400	pZ08096	tF08244
cF08406	pZ08143	tF08262
cF08438	pZ08211	tF08275
cF08461	pZ08278	tF08286
cF08471	pZ08306	tF08324
cF08478	pZ08337	tF08340
cF08515	pZ08340	tF08354
cF08516	pZ08348	tF08359
cF08550	pZ08354	tF08377
cF08554	pZ08371	tF08391
cF08587	pZ08405	tF08407
cF08606	pZ08421	tF08447
cF08699	pZ08447	tF08466
cF08730	pZ08491	tF08467
cF08734	pZ08505	tF08489
cF08787	pZ08594	tF08545
cF08800	pZ08599	tF08548
cF08810	pZ08600	tF08550
cF08812	pZ08604	tF08590
cF08830	pZ08627	tF08594
cF08848	pZ08628	tF08607
cF08861	pZ08629	tF08617
cF08920	pZ08637	tF08671
cF08933	pZ08653	tF08708
cF08948	pZ08665	tF08727
cF08954	pZ08680	tF08753
cF08960	pZ08682	tF08756
cF08987	pZ08708	tF08788
cF08991	pZ08710	tF08789
cF08995	pZ08714	tF08825
cF09001	pZ08717	tF08830
cF09057	pZ08720	tF08837
cF09060	pZ08757	tF08873
cF09065	pZ08788	tF08886
cF09066	pZ08834	tF08892
cF09072	pZ08867	tF08902
cF09087	pZ08872	tF08914
cF09098	pZ08875	tF09004
cF09154	pZ08910	tF09052
cF09163	pZ08914	tF09054
cF09176	pZ08916	tF09066
cF09190	pZ08930	tF09068
cF09213	pZ08942	tF09069
cF09263	pZ08982
cF09274	pZ09020
cF09304	pZ09071
cF09307	pZ09082
cF09309	pZ09163
cF09342
cF09373
cF09433
cF09442
cF09497
cF09554
cF09570
cF09586
cF09587
cF09645
cF09650
cF09651
cF09762
cF09772
cF09805
cF09818
cF09846
cF09850
cF09892
cF09927
cF09941

## Sheet: S6
TableS6-annotation of the secreted proteins in P. capitalensis
cF00060	502779.XP_002790248.1	6.7e-16	90.1					fuNOG[21]	0408S@ascNOG,0JDEM@euNOG,0M8YP@euroNOG,0PXV5@fuNOG,0Z2YJ@NOG,12I07@onyNOG,146QU@opiNOG	NA|NA|NA	S	Blastomyces yeast-phase-specific protein
cF00109	246410.XP_001248075.1	2.8e-78	297.7	FG08494.1				fuNOG[21]	03PRD@ascNOG,0IG6E@euNOG,0M6V2@euroNOG,0PJIS@fuNOG,11GIR@NOG,12J5E@onyNOG,13N9V@opiNOG	NA|NA|NA	S	Inherit from euroNOG: conserved hypothetical protein
cF00124	36630.CADNFIAP00000519	7.3e-51	206.1					fuNOG[21]	043T6@ascNOG,0K0FF@euNOG,0MD0B@euroNOG,0MTZJ@eurotNOG,0Q2C0@fuNOG,10AYK@NOG,14H0R@opiNOG	NA|NA|NA
cF00133	5022.CBX93965	4.9e-90	337	FG06208.1				fuNOG[21]	03MCV@ascNOG,0H3SY@dotNOG,0IFR4@euNOG,0PIEX@fuNOG,0XPS6@NOG,12R7E@opiNOG,1581I@pleNOG	NA|NA|NA	S	Glycosyl hydrolase family 61
cF00156	51453.JGI107142	5.3e-71	273.5		GO:0005575,GO:0005576	K19305		fuNOG[21]	03Z02@ascNOG,0JC3B@euNOG,0PWTN@fuNOG,0SF60@hypNOG,11FRE@NOG,144Z9@opiNOG,1A68W@sordNOG	NA|NA|NA	O	Deuterolysin metalloprotease (M35) family
cF00162	222929.XP_003067872.1	0	1090.9	FG11097.1				fuNOG[21]	03MJX@ascNOG,0M3Z1@euroNOG,0PF8B@fuNOG,0XSD2@NOG,12EKX@onyNOG,13K5E@opiNOG,KOG4157@euNOG	NA|NA|NA	G, O	Domain of unknown function (DUF1929)
cF00167	663202.XP_003018940.1	7.9e-12	76.3	FG02190.1				fuNOG[21]	030UD@arthNOG,03VWY@ascNOG,0J7TV@euNOG,0M8IX@euroNOG,0PU4H@fuNOG,0YV7B@NOG,12I5B@onyNOG,13Z67@opiNOG	NA|NA|NA	S	Inherit from onyNOG: IgE-binding protein
cF00217	5057.CADACLAP00000394	7.9e-234	815.1		GO:0000041,GO:0003674,GO:0003824,GO:0004322,GO:0005575,GO:0005622,GO:0005623,GO:0005737,GO:0005783,GO:0005886,GO:0006810,GO:0006811,GO:0006812,GO:0006826,GO:0006873,GO:0006875,GO:0006879,GO:0008150,GO:0008152,GO:0009987,GO:0015684,GO:0016020,GO:0016491,GO:0016722,GO:0016724,GO:0019725,GO:0030001,GO:0030003,GO:0033212,GO:0033215,GO:0034220,GO:0034755,GO:0042592,GO:0043226,GO:0043227,GO:0043229,GO:…	K19791		fuNOG[21]	03KS3@ascNOG,0M6D4@euroNOG,0PHHS@fuNOG,12Q5N@opiNOG,COG2132@NOG,KOG1263@euNOG	NA|NA|NA	Q	iron transport multicopper oxidase FET3
cF00268	229533.XP_380204.1	9.4e-29	134	FG00028.1	GO:0003674,GO:0003824,GO:0005575,GO:0005576,GO:0008150,GO:0008152,GO:0008233,GO:0008237,GO:0016787,GO:0044046,GO:0044403,GO:0044419,GO:0051701,GO:0051704,GO:0052047,GO:0052048,GO:0052051,GO:0052211,GO:0070011	K07762		fuNOG[21]	03M8D@ascNOG,0IFMM@euNOG,0PIAE@fuNOG,0SCMB@hypNOG,0WXME@necNOG,0XPH7@NOG,1300I@opiNOG,1A3WT@sordNOG	NA|NA|NA	O	Pregnancy-associated plasma protein-A
cF00269	5059.CADAFLAP00013042	1.5e-61	242.7					fuNOG[21]	0406K@ascNOG,0JDJ3@euNOG,0PXVJ@fuNOG,118ZH@NOG,1468N@opiNOG	NA|NA|NA
cF00315	5059.CADAFLAP00005977	1.1e-74	285		GO:0003674,GO:0003824,GO:0004091,GO:0008150,GO:0008152,GO:0016787,GO:0016788,GO:0052689			fuNOG[21]	03J4Z@ascNOG,0PF9S@fuNOG,13MZ3@opiNOG,COG2272@NOG,KOG4389@euNOG	NA|NA|NA	T	Carboxylesterase
cF00332	164328.Phyra84465	2e-215	753.8		GO:0002165,GO:0003674,GO:0003824,GO:0004091,GO:0005575,GO:0005622,GO:0005623,GO:0005737,GO:0005811,GO:0007275,GO:0007444,GO:0007472,GO:0007476,GO:0007552,GO:0007560,GO:0007568,GO:0008150,GO:0008152,GO:0008340,GO:0009653,GO:0009791,GO:0009886,GO:0009887,GO:0010033,GO:0010259,GO:0010876,GO:0016787,GO:0016788,GO:0019915,GO:0032501,GO:0032502,GO:0033036,GO:0035107,GO:0035114,GO:0035120,GO:0035220,GO:…	K01044,K01050		euNOG[57]	COG2272@NOG,KOG1516@euNOG	NA|NA|NA	Q	Carboxylesterase
cF00369	13684.SNOT_02157	1.3e-129	468.8	FG08126.1	GO:0000271,GO:0003674,GO:0003824,GO:0004553,GO:0004573,GO:0005575,GO:0005622,GO:0005623,GO:0005737,GO:0005783,GO:0005788,GO:0005975,GO:0005976,GO:0006464,GO:0006486,GO:0006487,GO:0008150,GO:0008152,GO:0009058,GO:0009059,GO:0009100,GO:0009101,GO:0009987,GO:0015926,GO:0016051,GO:0016787,GO:0016798,GO:0017177,GO:0019538,GO:0031974,GO:0032991,GO:0034645,GO:0036211,GO:0043170,GO:0043226,GO:0043227,GO:…	K08288		fuNOG[21]	03KAB@ascNOG,0H6AE@dotNOG,0PG93@fuNOG,0XPE3@NOG,12S59@opiNOG,157QU@pleNOG,KOG2397@euNOG	NA|NA|NA	T	Glucosidase II beta subunit-like protein
cF00407	13684.SNOT_12388	4.9e-26	125.9					fuNOG[21]	04C7C@ascNOG,0HBCC@dotNOG,0IMAM@euNOG,0QD49@fuNOG,111WQ@NOG,139Q6@opiNOG,15DXK@pleNOG	NA|NA|NA
cF00410	240176.XP_001835661.1	1.7e-45	189.1	FG11315.1				fuNOG[21]	01874@agaNOG,01HEV@agarNOG,095CY@basNOG,0IWUK@euNOG,0PMWT@fuNOG,11FPP@NOG,13QJG@opiNOG	NA|NA|NA
cF00416	336963.XP_002544882.1	1.5e-09	70.9					fuNOG[21]	0450K@ascNOG,0IQZ8@euNOG,0MGNY@euroNOG,0Q5N1@fuNOG,10TB2@NOG,12IUC@onyNOG,1322G@opiNOG	NA|NA|NA
cF00505	13684.SNOT_06409	4e-118	430.3	CBHC	GO:0000272,GO:0003674,GO:0003824,GO:0004553,GO:0005575,GO:0005576,GO:0005975,GO:0005976,GO:0008150,GO:0008152,GO:0009056,GO:0009057,GO:0009251,GO:0016052,GO:0016162,GO:0016787,GO:0016798,GO:0043170,GO:0044042,GO:0044238,GO:0071704,GO:1901575	K19668		fuNOG[21]	03JWB@ascNOG,0IEPE@euNOG,0PGYJ@fuNOG,13KE2@opiNOG,COG5297@NOG	NA|NA|NA	G	The biological conversion of cellulose to glucose generally requires three types of hydrolytic enzymes (1) Endoglucanases which cut internal beta-1,4-glucosidic bonds
cF00506	861557.XP_003303702.1	1.9e-50	204.9					fuNOG[21]	03JQE@ascNOG,0H3WT@dotNOG,0IFNS@euNOG,0PFES@fuNOG,104ZG@NOG,12R3G@opiNOG,1594K@pleNOG	NA|NA|NA
cF00555	13684.SNOT_01753	5.1e-75	286.6		GO:0005575,GO:0005576			fuNOG[21]	03M8D@ascNOG,0H7K9@dotNOG,0IFMM@euNOG,0PIAE@fuNOG,0XPH7@NOG,1300I@opiNOG,15A70@pleNOG	NA|NA|NA	O	Pregnancy-associated plasma protein-A
cF00596	13684.SNOT_00570	3.4e-290	1003	FG03883.1				fuNOG[21]	03J8Q@ascNOG,0H628@dotNOG,0IHS2@euNOG,0PGAH@fuNOG,0XNPT@NOG,12QV7@opiNOG,157WU@pleNOG	NA|NA|NA
cF00624	559298.XP_002622940.1	5.1e-119	433.7					fuNOG[21]	03P5F@ascNOG,0IHPE@euNOG,0M786@euroNOG,0PK2Z@fuNOG,0YNRS@NOG,13MCH@opiNOG	NA|NA|NA	S	isoamyl alcohol oxidase
cF00677	140110.NechaP54454	2.5e-143	514.2	FG08115.1				fuNOG[21]	04B9P@ascNOG,0KNHH@euNOG,0Q9HC@fuNOG,0SIM3@hypNOG,0WXXJ@necNOG,10XFW@NOG,137XI@opiNOG,1A39U@sordNOG	NA|NA|NA	S	Protein of unknown function (DUF1593)
cF00679	5059.CADAFLAP00004515	4.3e-101	373.6		GO:0005575,GO:0005576			NOG[107]	COG2730@NOG	NA|NA|NA	G	Glycoside hydrolase Family 5
cF00691	13684.SNOT_02018	6.9e-71	273.5	PEP1	GO:0005575,GO:0005576,GO:0006508,GO:0008150,GO:0008152,GO:0019538,GO:0043170,GO:0044238,GO:0071704	K01379,K06004		fuNOG[21]	03JP4@ascNOG,0H6GQ@dotNOG,0PH8I@fuNOG,0XNV7@NOG,12NU9@opiNOG,158EX@pleNOG,KOG1339@euNOG	NA|NA|NA	O	Secreted aspartic endopeptidase that allows assimilation of proteinaceous substrates. Can catalyze hydrolysis of the major structural proteins of basement membrane, elastin, collagen, and laminin
cF00705	5022.CBX95814	1.3e-266	924.5			K15920		fuNOG[21]	03NH1@ascNOG,0H4PQ@dotNOG,0IE0I@euNOG,0PJ69@fuNOG,12SYG@opiNOG,15DCJ@pleNOG,COG1472@NOG	NA|NA|NA	G	Fn3_like
cF00716	5059.CADAFLAP00011923	1.6e-39	168.3					fuNOG[21]	03QEZ@ascNOG,0IYDJ@euNOG,0MEAD@euroNOG,0MS7K@eurotNOG,0PF7T@fuNOG,13PAR@opiNOG,COG0775@NOG	NA|NA|NA	F	Phosphorylase superfamily
cF00728	1047171.EFQ31645	3.8e-101	373.2	FG01829.1		K01785		fuNOG[21]	03PET@ascNOG,0H5Z9@dotNOG,0PJ9W@fuNOG,12QR4@opiNOG,COG2017@NOG,KOG1604@euNOG	NA|NA|NA	G	Aldose 1-epimerase
cF00749	578458.XP_003032839.1	5.9e-56	223	FG10959.1	GO:0005575,GO:0005576			fuNOG[21]	0IZUR@euNOG,0PQ6D@fuNOG,11WEA@NOG,13TEA@opiNOG	NA|NA|NA	S	Conserved hypothetical protein
cF00761	5059.CADAFLAP00007061	2.7e-99	367.5	FG01982.1				fuNOG[21]	03MFK@ascNOG,0IHTS@euNOG,0M837@euroNOG,0MIKM@eurotNOG,0PIXU@fuNOG,12U8W@opiNOG,COG3485@NOG	NA|NA|NA	Q	Dioxygenase
cF00781	5022.CBY01948	2.6e-156	557					fuNOG[21]	03YP8@ascNOG,0HBI3@dotNOG,0JAK1@euNOG,0PV9R@fuNOG,140FA@opiNOG,15AN1@pleNOG,COG3940@NOG	NA|NA|NA	G	Glycosyl hydrolases family 43
cF00810	426418.XP_001941039.1	2.7e-75	288.1					fuNOG[21]	03RXC@ascNOG,0H7ZX@dotNOG,0IXD4@euNOG,0PNXM@fuNOG,0ZHS9@NOG,13S12@opiNOG,1595H@pleNOG	NA|NA|NA
cF00820	5022.CBX92329	5.7e-296	1021.9		GO:0003674,GO:0003824,GO:0004553,GO:0008150,GO:0008152,GO:0008422,GO:0015926,GO:0016787,GO:0016798	K05349		fuNOG[21]	03MNJ@ascNOG,0H4RX@dotNOG,0IG0I@euNOG,0PIQB@fuNOG,13M4P@opiNOG,15DHV@pleNOG,COG1472@NOG	NA|NA|NA	G	Fn3_like
cF00826	426418.XP_001938506.1	3.7e-214	750	FG00259.1	GO:0000322,GO:0000323,GO:0000324,GO:0005575,GO:0005576,GO:0005622,GO:0005623,GO:0005737,GO:0005773,GO:0005829,GO:0043226,GO:0043227,GO:0043229,GO:0043231,GO:0044424,GO:0044444,GO:0044464			fuNOG[21]	03JQK@ascNOG,0H6EI@dotNOG,0PHZS@fuNOG,12QK0@opiNOG,159FS@pleNOG,COG0737@NOG,KOG4419@euNOG	NA|NA|NA	F	Calcineurin-like phosphoesterase
cF00837	5059.CADAFLAP00010945	2.5e-189	667.2	FG11386.1	GO:0003674,GO:0003824,GO:0004091,GO:0005575,GO:0005576,GO:0008150,GO:0008152,GO:0016787,GO:0016788,GO:0052689			fuNOG[21]	03PKK@ascNOG,0PM9K@fuNOG,13KI9@opiNOG,COG2272@NOG,KOG4389@euNOG	NA|NA|NA	T	Carboxylesterase family
cF00854	36630.CADNFIAP00010241	1.1e-174	618.6	FG01711.1		K01046		fuNOG[21]	03KP1@ascNOG,0M6IF@euroNOG,0MICW@eurotNOG,0PHQB@fuNOG,12SG8@opiNOG,COG2272@NOG,KOG1516@euNOG	NA|NA|NA	T	Carboxylesterase family
cF00889	426418.XP_001939953.1	1.6e-24	119	FG05656.1		K11244		fuNOG[21]	03SRV@ascNOG,0H8FS@dotNOG,0PPTS@fuNOG,11FP9@NOG,13SKN@opiNOG,15CBF@pleNOG,KOG4157@euNOG	NA|NA|NA	G, O	WSC domain
cF00902	441959.XP_002485644.1	8.6e-93	345.9	FG02354.1	GO:0003674,GO:0003824,GO:0004553,GO:0004568,GO:0005575,GO:0005576,GO:0006022,GO:0006026,GO:0006030,GO:0006032,GO:0006040,GO:0006807,GO:0007275,GO:0008150,GO:0008152,GO:0009056,GO:0009057,GO:0016787,GO:0016798,GO:0032501,GO:0032502,GO:0043170,GO:0043581,GO:0044699,GO:0044707,GO:0044767,GO:0046348,GO:0048856,GO:0071704,GO:1901071,GO:1901072,GO:1901135,GO:1901136,GO:1901564,GO:1901565,GO:1901575			fuNOG[21]	03M3N@ascNOG,0M6EB@euroNOG,0MJGX@eurotNOG,0PI4X@fuNOG,13MWD@opiNOG,COG3325@NOG,KOG2806@euNOG	NA|NA|NA	G	Class V chitinase
cF00914	5022.CBX91779	5.2e-35	152.9					fuNOG[21]	03U2C@ascNOG,0H9EQ@dotNOG,0J1IR@euNOG,0PQVS@fuNOG,0Y87S@NOG,13U91@opiNOG,15EEC@pleNOG	NA|NA|NA
cF00934	36630.CADNFIAP00001967	4.8e-34	150.2	FG10176.1				fuNOG[21]	03S6C@ascNOG,0IY0J@euNOG,0M60X@euroNOG,0MNS6@eurotNOG,0PP9T@fuNOG,124H6@NOG,13SBX@opiNOG	NA|NA|NA	S	GPI anchored protein
cF00972	218491.ECA4126	6.7e-60	236.1	ANSA	GO:0003674,GO:0003824,GO:0005575,GO:0005623,GO:0006082,GO:0006520,GO:0006528,GO:0006807,GO:0008150,GO:0008152,GO:0009066,GO:0009987,GO:0016787,GO:0016810,GO:0016811,GO:0019752,GO:0034641,GO:0042597,GO:0043436,GO:0043603,GO:0044237,GO:0044238,GO:0044281,GO:0044464,GO:0044710,GO:0050417,GO:0071704,GO:1901564,GO:1901605	K01424,K05597	GLUN	bactNOG[38]	05HDK@bactNOG,0QKUC@gproNOG,16RJV@proNOG,COG0252@NOG	NA|NA|NA	E	L-asparaginase
cF01038	1047171.EFQ32852	8.4e-72	275.8					fuNOG[21]	03R29@ascNOG,0H70D@dotNOG,0IW0K@euNOG,0PN1N@fuNOG,1226G@NOG,13PRM@opiNOG	NA|NA|NA
cF01039	1047171.EFQ32853	1e-55	222.2	FG03895.1				fuNOG[21]	03QET@ascNOG,0H72Q@dotNOG,0IHBD@euNOG,0PMI4@fuNOG,11HBP@NOG,13PB9@opiNOG	NA|NA|NA
cF01077	426418.XP_001941052.1	3.4e-76	290.8					fuNOG[21]	03P2X@ascNOG,0H3DB@dotNOG,0IJ75@euNOG,0PIHC@fuNOG,0XS3C@NOG,13K13@opiNOG,1598J@pleNOG	NA|NA|NA	S	Inherit from ascNOG: BNR Asp-box repeat
cF01078	426418.XP_001930951.1	1.7e-149	534.6	FG00406.1		K01078		fuNOG[21]	03PTV@ascNOG,0H6DJ@dotNOG,0IE9X@euNOG,0PKYM@fuNOG,10AHQ@NOG,1348G@opiNOG,158KF@pleNOG	NA|NA|NA	S	Pfam:Acid_phosphat_A
cF01079	4950.XP_003680954.1	6.3e-17	93.2	FG02744.1	GO:0000322,GO:0000323,GO:0000324,GO:0003674,GO:0005488,GO:0005496,GO:0005575,GO:0005576,GO:0005618,GO:0005622,GO:0005623,GO:0005634,GO:0005635,GO:0005737,GO:0005773,GO:0005783,GO:0006810,GO:0006869,GO:0008150,GO:0008289,GO:0009277,GO:0010876,GO:0012505,GO:0015850,GO:0015918,GO:0030312,GO:0031967,GO:0031975,GO:0032934,GO:0033036,GO:0036094,GO:0043178,GO:0043226,GO:0043227,GO:0043229,GO:0043231,GO:…			fuNOG[21]	03QXR@ascNOG,0PMWK@fuNOG,12TIJ@opiNOG,19AV3@saccNOG,19GQC@sacNOG,COG2340@NOG,KOG3017@euNOG	NA|NA|NA	S	sterol transport
cF01094	5022.CBX91234	9.1e-152	542.7	FG00294.1				fuNOG[21]	03KZ0@ascNOG,0H4T9@dotNOG,0IFEI@euNOG,0PG4P@fuNOG,0XPIN@NOG,12QQ7@opiNOG,15B5C@pleNOG	NA|NA|NA	G	Glycosyl hydrolase family 76
cF01098	36630.CADNFIAP00001511	3e-22	110.9	FG00415.1				fuNOG[21]	03WC8@ascNOG,0J84N@euNOG,0M8F2@euroNOG,0MNMD@eurotNOG,0PU6E@fuNOG,0ZDMK@NOG,14088@opiNOG	NA|NA|NA	S	GPI anchored serine-threonine rich protein
cF01160	441959.XP_002487282.1	3.5e-20	105.9					fuNOG[21]	04282@ascNOG,0J1YU@euNOG,0MB33@euroNOG,0MTDX@eurotNOG,0Q07U@fuNOG,0YDUB@NOG,13W20@opiNOG	NA|NA|NA
cF01196	5061.CADANGAP00013103	6e-153	546.2	FG03601.1	GO:0003674,GO:0003824,GO:0004091,GO:0008150,GO:0008152,GO:0016787,GO:0016788,GO:0052689			fuNOG[21]	03IH9@ascNOG,0M4SH@euroNOG,0PM0V@fuNOG,12PS2@opiNOG,COG2272@NOG,KOG4389@euNOG	NA|NA|NA	T	Triacylglycerol lipase
cF01256	39416.CAZ85023	1.4e-37	162.2	FG07441.1				fuNOG[21]	03TSI@ascNOG,0J0FH@euNOG,0PQNX@fuNOG,120GF@NOG,13UA7@opiNOG	NA|NA|NA	S	Conserved hypothetical protein
cF01262	148305.A4R2L6	7.5e-107	393.3		GO:0003008,GO:0003674,GO:0003824,GO:0003990,GO:0004091,GO:0004104,GO:0006066,GO:0006576,GO:0006807,GO:0007154,GO:0007267,GO:0007268,GO:0007271,GO:0008150,GO:0008152,GO:0009308,GO:0009987,GO:0016787,GO:0016788,GO:0019226,GO:0019695,GO:0023052,GO:0032501,GO:0034641,GO:0035637,GO:0042439,GO:0044106,GO:0044237,GO:0044281,GO:0044699,GO:0044700,GO:0044707,GO:0044710,GO:0044763,GO:0050877,GO:0052689,GO:…			fuNOG[21]	03JRS@ascNOG,0PKN8@fuNOG,0UDAH@magNOG,13NZ4@opiNOG,19J89@sordNOG,COG2272@NOG,KOG4389@euNOG	NA|NA|NA	T	Carboxylesterase family
cF01284	5022.CBX92259	1.7e-172	612.1	FG10234.1				fuNOG[21]	03P5G@ascNOG,0H5R9@dotNOG,0IG8S@euNOG,0PKQJ@fuNOG,0ZSAG@NOG,13FE6@opiNOG,15DD9@pleNOG	NA|NA|NA	S	Inherit from dotNOG: Fungal domain of unknown function (DUF1712)
cF01366	426418.XP_001931751.1	1.8e-85	320.9	ERV25	GO:0000139,GO:0005575,GO:0005622,GO:0005623,GO:0005737,GO:0005783,GO:0005789,GO:0005794,GO:0006810,GO:0006886,GO:0006888,GO:0008104,GO:0008150,GO:0009987,GO:0012505,GO:0015031,GO:0016020,GO:0016023,GO:0016192,GO:0016482,GO:0030133,GO:0030134,GO:0030135,GO:0031090,GO:0031410,GO:0031982,GO:0031988,GO:0033036,GO:0034613,GO:0042175,GO:0043226,GO:0043227,GO:0043229,GO:0043231,GO:0044422,GO:0044424,GO:…			fuNOG[21]	03J8D@ascNOG,0H49C@dotNOG,0PKXU@fuNOG,0XTBQ@NOG,138T3@opiNOG,15B6B@pleNOG,KOG1691@euNOG	NA|NA|NA	U	EMP24_GP25L
cF01371	578458.XP_003028589.1	1.4e-36	159.5			K08254		fuNOG[21]	0IKK7@euNOG,0PJGT@fuNOG,11H6V@NOG,13J6K@opiNOG	NA|NA|NA	G	hydrolase family 71 protein
cF01394	426418.XP_001936659.1	2.7e-140	505	FG06305.1	GO:0005575,GO:0005622,GO:0005623,GO:0005737,GO:0005783,GO:0006508,GO:0006511,GO:0008150,GO:0008152,GO:0009056,GO:0009057,GO:0009987,GO:0010498,GO:0019538,GO:0019941,GO:0030163,GO:0030433,GO:0043161,GO:0043170,GO:0043226,GO:0043227,GO:0043229,GO:0043231,GO:0043632,GO:0044237,GO:0044238,GO:0044248,GO:0044257,GO:0044260,GO:0044265,GO:0044267,GO:0044424,GO:0044444,GO:0044464,GO:0051603,GO:0071704,GO:…	K01230		fuNOG[21]	03MPN@ascNOG,0H4SF@dotNOG,0PKHB@fuNOG,0XP04@NOG,13NN0@opiNOG,157E2@pleNOG,KOG2431@euNOG	NA|NA|NA	G	Glycosyl hydrolase family 47
cF01420	526221.XP_003000688.1	3.6e-206	723.4					fuNOG[21]	04C41@ascNOG,0JBB8@euNOG,0QC64@fuNOG,139MI@opiNOG,COG1231@NOG	NA|NA|NA	H	Flavin containing amine oxidoreductase
cF01448	5059.CADAFLAP00010267	1.9e-151	540.8	PLYC	GO:0005575,GO:0005576			euNOG[57]	0IJ4C@euNOG,0XQBW@NOG	NA|NA|NA	G	Pectinolytic enzyme consist of four classes of enzymes pectin lyase, polygalacturonase, pectin methylesterase and rhamnogalacturonase. Among pectinolytic enzymes, pectin lyase is the most important in depolymerization of pectin, since it cleaves internal glycosidic bonds of highly methylated pectins. Favors pectate, the anion, over pectin, the methyl ester (By similarity)
cF01485	578455.XP_003653830.1	2.7e-58	230.7					fuNOG[21]	03P2X@ascNOG,0CSFR@chaNOG,0IJ75@euNOG,0PIHC@fuNOG,0XS3C@NOG,13K13@opiNOG,19NBA@sordNOG,1AFFD@sorNOG	NA|NA|NA	S	glycoside hydrolase family 93 protein
cF01513	13684.SNOT_09546	3.7e-278	963	FG00261.1	GO:0005575,GO:0005622,GO:0005623,GO:0005737,GO:0005783,GO:0005789,GO:0006457,GO:0008150,GO:0008152,GO:0009987,GO:0012505,GO:0016020,GO:0016021,GO:0019538,GO:0030176,GO:0031090,GO:0031224,GO:0031227,GO:0031300,GO:0031301,GO:0032991,GO:0034975,GO:0042175,GO:0043170,GO:0043226,GO:0043227,GO:0043229,GO:0043231,GO:0043234,GO:0044237,GO:0044238,GO:0044260,GO:0044267,GO:0044422,GO:0044424,GO:0044425,GO:…			fuNOG[21]	03JZU@ascNOG,0H3RD@dotNOG,0PIW9@fuNOG,0XPCR@NOG,12PEE@opiNOG,15ANE@pleNOG,KOG2103@euNOG	NA|NA|NA	S	Protein of unknown function (DUF1620)
cF01541	148305.A4RET5	2.4e-78	298.5		GO:0003674,GO:0003824,GO:0004497,GO:0005488,GO:0005506,GO:0008150,GO:0008152,GO:0016491,GO:0020037,GO:0043167,GO:0043169,GO:0044710,GO:0046872,GO:0046906,GO:0046914,GO:0055114,GO:0097159,GO:1901363			fuNOG[21]	03PK9@ascNOG,0IVSH@euNOG,0PM02@fuNOG,0UAJ5@magNOG,0ZIU8@NOG,13KGJ@opiNOG,19JQW@sordNOG	NA|NA|NA	Q	Cytochrome P450
cF01574	13684.SNOT_00225	1.5e-195	688.3					fuNOG[21]	03N3S@ascNOG,0H4XH@dotNOG,0II3R@euNOG,0PJ5J@fuNOG,0Y9TP@NOG,13K7P@opiNOG,15DW1@pleNOG	NA|NA|NA	S	Inherit from dotNOG: peptidase S41 family protein
cF01651	5022.CBX99581	3.4e-255	885.9	CPYA	GO:0000322,GO:0000323,GO:0000324,GO:0000328,GO:0003674,GO:0003824,GO:0004180,GO:0004185,GO:0005488,GO:0005515,GO:0005575,GO:0005622,GO:0005623,GO:0005737,GO:0005773,GO:0005775,GO:0005783,GO:0006518,GO:0006807,GO:0007039,GO:0007275,GO:0008150,GO:0008152,GO:0008233,GO:0008236,GO:0008238,GO:0009056,GO:0009057,GO:0009058,GO:0009987,GO:0016787,GO:0017171,GO:0019538,GO:0019748,GO:0030163,GO:0031974,GO:…	K13289		fuNOG[21]	03JXP@ascNOG,0H55Z@dotNOG,0PFU0@fuNOG,12T1C@opiNOG,158K5@pleNOG,COG2939@NOG,KOG1282@euNOG	NA|NA|NA	O	Vacuolar carboxypeptidase involved in degradation of small peptides. Digests preferentially peptides containing an aliphatic or hydrophobic residue in P1' position, as well as methionine, leucine or phenylalanine in P1 position of ester substrate (By similarity)
cF01661	1047171.EFQ32639	2.2e-133	480.7					fuNOG[21]	03J9K@ascNOG,0H6BZ@dotNOG,0IGSQ@euNOG,0PKW4@fuNOG,0XTFB@NOG,13KKY@opiNOG	NA|NA|NA	S	Inherit from ascNOG: Conserved hypothetical protein
cF01732	5507.FOXG_11712P0	8.9e-109	398.7	FG03954.1	GO:0000322,GO:0000323,GO:0000324,GO:0005575,GO:0005618,GO:0005622,GO:0005623,GO:0005737,GO:0005773,GO:0009277,GO:0030312,GO:0043226,GO:0043227,GO:0043229,GO:0043231,GO:0044424,GO:0044444,GO:0044464,GO:0071944			fuNOG[21]	03KQ8@ascNOG,0IF89@euNOG,0PHRJ@fuNOG,0SE56@hypNOG,0XPEP@NOG,12QE7@opiNOG,19KAR@sordNOG	NA|NA|NA	O	Inherit from ascNOG: metallopeptidase activity
cF01802	771870.XP_003349497.1	4.7e-302	1042.3	FG03570.1	GO:0005575,GO:0005576			fuNOG[21]	03Q1W@ascNOG,0IF8V@euNOG,0PM1F@fuNOG,12TDY@opiNOG,19P0Q@sordNOG,1A7NJ@sorNOG,COG1472@NOG	NA|NA|NA	G	Fn3_like
cF01820	500485.XP_002556982.1	9.8e-135	485.3	FG04685.1				fuNOG[21]	03KPV@ascNOG,0IF84@euNOG,0MEX4@euroNOG,0MJKK@eurotNOG,0PHR9@fuNOG,13M9F@opiNOG,COG3485@NOG	NA|NA|NA	Q	Dioxygenase
cF01842	5141.EFNCRP00000005832	7.8e-36	156					fuNOG[21]	0JDJ0@euNOG,0PXMK@fuNOG,0YNK2@NOG,146E2@opiNOG	NA|NA|NA
cF01852	861557.XP_003303045.1	2.6e-113	413.7	GPI12	GO:0000225,GO:0003674,GO:0003824,GO:0005575,GO:0005622,GO:0005623,GO:0005737,GO:0005783,GO:0005789,GO:0006464,GO:0006497,GO:0006505,GO:0006506,GO:0006629,GO:0006643,GO:0006644,GO:0006650,GO:0006661,GO:0006664,GO:0006793,GO:0006796,GO:0008150,GO:0008152,GO:0008610,GO:0008654,GO:0009058,GO:0009059,GO:0009247,GO:0009987,GO:0012505,GO:0016020,GO:0016021,GO:0016787,GO:0016810,GO:0016811,GO:0019213,GO:…	K03434		fuNOG[21]	03NUM@ascNOG,0H6PZ@dotNOG,0PF9B@fuNOG,13RIT@opiNOG,15AUB@pleNOG,COG2120@NOG,KOG3332@euNOG	NA|NA|NA	M	GlcNAc-PI de-N-acetylase
cF01913	246410.XP_001248895.1	5.1e-11	72.8					fuNOG[21]	03UE8@ascNOG,0J1WF@euNOG,0M8YI@euroNOG,0PREH@fuNOG,0YKC7@NOG,12INU@onyNOG,13VJ0@opiNOG	NA|NA|NA
cF01950	663202.XP_003024980.1	1e-77	295	FG06993.1	GO:0005575,GO:0005576			fuNOG[21]	0311Y@arthNOG,03IPP@ascNOG,0IEDU@euNOG,0M4HF@euroNOG,0PFRC@fuNOG,0XS2C@NOG,12HK2@onyNOG,13IQD@opiNOG	NA|NA|NA	S	Pfam:DUF1994
cF02013	5022.CBX96217	0	1066.2	KAR2	GO:0000003,GO:0000166,GO:0000741,GO:0000742,GO:0000746,GO:0000747,GO:0000974,GO:0001882,GO:0001883,GO:0003674,GO:0003824,GO:0005488,GO:0005515,GO:0005524,GO:0005575,GO:0005576,GO:0005622,GO:0005623,GO:0005634,GO:0005635,GO:0005730,GO:0005737,GO:0005783,GO:0005788,GO:0005794,GO:0006139,GO:0006152,GO:0006163,GO:0006195,GO:0006200,GO:0006355,GO:0006457,GO:0006458,GO:0006508,GO:0006511,GO:0006605,GO:…	K09490		fuNOG[21]	03K33@ascNOG,0H3PS@dotNOG,0PH5U@fuNOG,12PIY@opiNOG,15DJ2@pleNOG,COG0443@NOG,KOG0101@euNOG	NA|NA|NA	O	MreB/Mbl protein
cF02021	426418.XP_001940205.1	8.2e-74	282.3	FG04647.1				fuNOG[21]	03S7Y@ascNOG,0H65Z@dotNOG,0IX7V@euNOG,0PPAV@fuNOG,11IZS@NOG,13RT5@opiNOG,157JF@pleNOG	NA|NA|NA	S	Protein of unknown function (DUF3129)
cF02025	426418.XP_001938198.1	5.3e-56	223.8					fuNOG[21]	03QKA@ascNOG,0H89R@dotNOG,0IIQ2@euNOG,0PMAB@fuNOG,11YHN@NOG,13PKK@opiNOG,15BET@pleNOG	NA|NA|NA
cF02084	441959.XP_002483439.1	2.5e-134	484.6	ERO1	GO:0003674,GO:0003756,GO:0003824,GO:0005575,GO:0005622,GO:0005623,GO:0005737,GO:0005783,GO:0005789,GO:0006457,GO:0008150,GO:0008152,GO:0009987,GO:0012505,GO:0016020,GO:0016491,GO:0016667,GO:0016670,GO:0016853,GO:0016860,GO:0016862,GO:0016864,GO:0016972,GO:0019538,GO:0031090,GO:0034975,GO:0042175,GO:0043170,GO:0043226,GO:0043227,GO:0043229,GO:0043231,GO:0044237,GO:0044238,GO:0044260,GO:0044267,GO:…			fuNOG[21]	03J16@ascNOG,0M52I@euroNOG,0MMY3@eurotNOG,0PG36@fuNOG,12R24@opiNOG,COG5061@NOG,KOG2608@euNOG	NA|NA|NA	O, U	oxidoreductin
cF02086	5061.CADANGAP00000435	1.4e-92	345.1		GO:0000272,GO:0003674,GO:0003824,GO:0004553,GO:0005975,GO:0005976,GO:0008150,GO:0008152,GO:0009056,GO:0009057,GO:0009251,GO:0016052,GO:0016787,GO:0016798,GO:0042972,GO:0043170,GO:0044042,GO:0044238,GO:0071704,GO:1901575			fuNOG[21]	03PTE@ascNOG,0IIRU@euNOG,0M7M3@euroNOG,0PK1Z@fuNOG,11FI3@NOG,13ABB@opiNOG	NA|NA|NA	G	endo-1,3(4)-beta-glucanase
cF02132	578458.XP_003029269.1	1.6e-152	544.7	CBHI	GO:0005575,GO:0005576	K01225		fuNOG[21]	01A2C@agaNOG,01D1C@agarNOG,094XJ@basNOG,0IE3Y@euNOG,0PKV3@fuNOG,101KD@NOG,12T68@opiNOG	NA|NA|NA	G	Cellobiohydrolase
cF02154	40559.EDN30018	5.8e-129	466.8					fuNOG[21]	03MWW@ascNOG,0IJFV@euNOG,0PHWY@fuNOG,0XPUV@NOG,13KXY@opiNOG	NA|NA|NA	S	Arylsulfotransferase (ASST)
cF02188	36630.CADNFIAP00003329	7.7e-26	123.2			K01210		fuNOG[21]	03JWX@ascNOG,0IHWI@euNOG,0MBS2@euroNOG,0MKN5@eurotNOG,0PIPD@fuNOG,10VFP@NOG,12U99@opiNOG	NA|NA|NA	S	Exo-beta-1,3-glucanase
cF02197	500485.XP_002562797.1	4.4e-75	288.9					fuNOG[21]	03MR7@ascNOG,0IRDF@euNOG,0MCZA@euroNOG,0MIBX@eurotNOG,0PJCP@fuNOG,13HYP@opiNOG,COG0642@NOG,COG0784@NOG,KOG0519@euNOG	NA|NA|NA	T	His Kinase A (phospho-acceptor) domain
cF02204	578458.XP_003029971.1	7.7e-176	622.1	FG03402.1		K01078		fuNOG[21]	0PGG2@fuNOG,11FS8@NOG,12RUP@opiNOG,KOG1382@euNOG	NA|NA|NA	S	acid) phosphatase
cF02213	40559.EDN32690	2e-41	174.9					fuNOG[21]	03RB3@ascNOG,0IWZF@euNOG,0PN9Z@fuNOG,125T5@NOG,13QNB@opiNOG	NA|NA|NA	S	Conserved fungal protein
cF02227	861557.XP_003301465.1	6.6e-106	390.2					fuNOG[21]	03PI5@ascNOG,0H6TK@dotNOG,0PJ6X@fuNOG,12SF8@opiNOG,15E1H@pleNOG,COG2303@NOG,KOG1238@euNOG	NA|NA|NA	E	GMC oxidoreductase
cF02246	140110.NechaP53189	1.7e-125	454.5	FG02263.1				fuNOG[21]	03PN9@ascNOG,0ITAH@euNOG,0PKKE@fuNOG,13P3K@opiNOG,COG1840@NOG	NA|NA|NA	P	ABC-type Fe3 transport system
cF02265	5022.CBY00064	2.5e-71	275.4	FG00316.1				fuNOG[21]	03PKC@ascNOG,0H47G@dotNOG,0PK48@fuNOG,121N2@NOG,13KW8@opiNOG,15AX3@pleNOG,KOG0800@euNOG	NA|NA|NA	O	Zinc finger, C3HC4 type (RING finger)
cF02298	559298.XP_002626608.1	2.7e-181	640.6			K01230		fuNOG[21]	03JZT@ascNOG,0MFT1@euroNOG,0PG1N@fuNOG,0XP04@NOG,12GNM@onyNOG,13J24@opiNOG,KOG2431@euNOG	NA|NA|NA	G	Class I alpha-mannosidase
cF02341	29850.GGTG_07291T0	6.9e-152	542.7	FG11020.1		K01426		fuNOG[21]	03MPI@ascNOG,0PIP8@fuNOG,0U7UP@magNOG,12RPS@opiNOG,19JR5@sordNOG,COG0154@NOG,KOG1211@euNOG	NA|NA|NA	J	Amidase
cF02347	426418.XP_001939198.1	6.7e-139	499.6	SGA1	GO:0000003,GO:0000272,GO:0000322,GO:0000323,GO:0000324,GO:0003006,GO:0003674,GO:0003824,GO:0004339,GO:0004553,GO:0005575,GO:0005622,GO:0005623,GO:0005628,GO:0005737,GO:0005773,GO:0005783,GO:0005794,GO:0005975,GO:0005976,GO:0005977,GO:0005980,GO:0006073,GO:0006091,GO:0006112,GO:0007049,GO:0008150,GO:0008152,GO:0009056,GO:0009057,GO:0009251,GO:0009653,GO:0009986,GO:0009987,GO:0015926,GO:0015980,GO:…	K01178		fuNOG[21]	03NKF@ascNOG,0H9R9@dotNOG,0IGG8@euNOG,0PJ6P@fuNOG,12SF0@opiNOG,15950@pleNOG,COG3387@NOG	NA|NA|NA	G	Glycosyl hydrolases family 15
cF02399	5022.CBX95749	1.7e-86	325.5			K01336		fuNOG[21]	03YN0@ascNOG,0HB6M@dotNOG,0PVRE@fuNOG,140XB@opiNOG,158AG@pleNOG,COG1404@NOG,KOG1153@euNOG	NA|NA|NA	O	Subtilase family
cF02447	1047171.EFQ35332	9.8e-131	472.2	FG03365.1	GO:0005575,GO:0005576			fuNOG[21]	03IFK@ascNOG,0H4GJ@dotNOG,0IGX3@euNOG,0PFH3@fuNOG,0Z1SH@NOG,13I3K@opiNOG	NA|NA|NA	S	Jacalin
cF02465	140110.NechaP99312	1.2e-21	109.4		GO:0005575,GO:0005576			fuNOG[21]	03U1W@ascNOG,0PRT6@fuNOG,0SF1Y@hypNOG,0WWMX@necNOG,13VDJ@opiNOG,19R95@sordNOG,COG2340@NOG,KOG3017@euNOG	NA|NA|NA	S	SCP
cF02489	246410.XP_001246176.1	9.9e-105	385.6	PGUG_01322	GO:0003674,GO:0003824,GO:0005575,GO:0005622,GO:0005623,GO:0005634,GO:0005737,GO:0006793,GO:0006796,GO:0008150,GO:0008152,GO:0009987,GO:0016311,GO:0016787,GO:0016788,GO:0016791,GO:0042578,GO:0043226,GO:0043227,GO:0043229,GO:0043231,GO:0044237,GO:0044424,GO:0044464			fuNOG[21]	03KXH@ascNOG,0M31Q@euroNOG,0PKMG@fuNOG,11QJY@NOG,12FRI@onyNOG,12TJY@opiNOG,KOG4754@euNOG	NA|NA|NA	G	phosphoglycerate mutase
cF02501	441960.XP_002152343.1	2e-65	255.8	FG03364.1				fuNOG[21]	03YH7@ascNOG,0J9Z6@euNOG,0MBMJ@euroNOG,0MS5S@eurotNOG,0PWKF@fuNOG,140ZF@opiNOG,COG1680@NOG	NA|NA|NA	V	penicillin-binding protein
cF02505	426418.XP_001932897.1	1.9e-97	362.1					fuNOG[21]	03R58@ascNOG,0HBAF@dotNOG,0IWAZ@euNOG,0PNMV@fuNOG,0Y9NG@NOG,13QN3@opiNOG,158YT@pleNOG	NA|NA|NA	S	Eukaryotic aspartyl protease
cF02537	13684.SNOT_06040	4.6e-148	529.6	PGUG_02940				fuNOG[21]	03PYJ@ascNOG,0H9WW@dotNOG,0IKU5@euNOG,0PMEJ@fuNOG,12PX3@opiNOG,15E5M@pleNOG,COG3386@NOG	NA|NA|NA	G	Major royal jelly protein
cF02571	5062.CADAORAP00006804	2.1e-163	580.9	WBP1	GO:0003674,GO:0003824,GO:0004576,GO:0004579,GO:0005575,GO:0005622,GO:0005623,GO:0005634,GO:0005635,GO:0005737,GO:0005783,GO:0005789,GO:0005975,GO:0006464,GO:0006486,GO:0006487,GO:0007049,GO:0008150,GO:0008152,GO:0008250,GO:0009058,GO:0009059,GO:0009100,GO:0009101,GO:0009987,GO:0012505,GO:0016020,GO:0016740,GO:0016757,GO:0016758,GO:0019538,GO:0031090,GO:0031967,GO:0031975,GO:0032991,GO:0034645,GO:…	K12670		fuNOG[21]	03MM3@ascNOG,0M2RZ@euroNOG,0PIP1@fuNOG,0XSF3@NOG,12PKB@opiNOG,KOG2754@euNOG	NA|NA|NA	O	oligosaccharyl transferase subunit (beta)
cF02584	29875.EHK20454	2e-204	717.6	FG10604.1	GO:0003674,GO:0003824,GO:0008150,GO:0008152,GO:0016491,GO:0016679,GO:0016682,GO:0044710,GO:0052716,GO:0055114	K19791		fuNOG[21]	03NKM@ascNOG,0PGU0@fuNOG,0SCH8@hypNOG,13IAH@opiNOG,19IMX@sordNOG,COG2132@NOG,KOG1263@euNOG	NA|NA|NA	Q	Multicopper oxidase
cF02585	5180.EDN98178	4.7e-12	76.6					NOG[107]	0Z1H5@NOG	NA|NA|NA
cF02606	861557.XP_003300454.1	3.4e-219	766.5					fuNOG[21]	04C4J@ascNOG,0H95C@dotNOG,0PIV8@fuNOG,12TR4@opiNOG,COG2124@NOG,KOG0156@euNOG	NA|NA|NA	Q	Cytochrome P450
cF02613	5059.CADAFLAP00000191	0	1127.5					fuNOG[21]	03Q8P@ascNOG,0IK7P@euNOG,0M4Z7@euroNOG,0MK1X@eurotNOG,0PKN0@fuNOG,13JV1@opiNOG,COG3537@NOG	NA|NA|NA	G	Glycosyl hydrolase family 92
cF02656	861557.XP_003305915.1	3e-56	223.8					fuNOG[21]	03SI6@ascNOG,0H78S@dotNOG,0IXKB@euNOG,0PNR3@fuNOG,11MY3@NOG,13RDU@opiNOG,15BA9@pleNOG	NA|NA|NA	G	Glycosyl hydrolase family 61
cF02662	771870.XP_003350347.1	1.3e-92	345.5	FG03965.1				fuNOG[21]	03QJ1@ascNOG,0IY36@euNOG,0PMIC@fuNOG,13P7T@opiNOG,19S9U@sordNOG,1AER5@sorNOG,COG2159@NOG	NA|NA|NA	S	Amidohydrolase
cF02674	1047171.EFQ34199	3.8e-147	526.9	FG03893.1				fuNOG[21]	03PT3@ascNOG,0H3PD@dotNOG,0IIT0@euNOG,0PKMN@fuNOG,13KMV@opiNOG,COG0402@NOG	NA|NA|NA	F	Amidohydrolase family
cF02742	5085.CADAFUBP00007626	7.2e-90	337.8					fuNOG[21]	043F3@ascNOG,0K0PU@euNOG,0MDYI@euroNOG,0MJNW@eurotNOG,0Q2PB@fuNOG,10AQM@NOG,14GQ2@opiNOG	NA|NA|NA	S	Arylsulfotransferase (ASST)
cF02774	426418.XP_001936288.1	4.7e-217	759.6					fuNOG[21]	03J20@ascNOG,0H5VN@dotNOG,0IF4G@euNOG,0PG45@fuNOG,0YGH3@NOG,12Q84@opiNOG,15D3A@pleNOG	NA|NA|NA	G	Bacterial alpha-L-rhamnosidase
cF02775	13684.SNOT_07015	9.8e-162	575.1	PGUG_05660	GO:0000322,GO:0000323,GO:0000324,GO:0003674,GO:0005488,GO:0005575,GO:0005622,GO:0005623,GO:0005737,GO:0005773,GO:0005783,GO:0006082,GO:0006520,GO:0006807,GO:0008150,GO:0008152,GO:0009987,GO:0019627,GO:0019752,GO:0030145,GO:0034641,GO:0043167,GO:0043169,GO:0043226,GO:0043227,GO:0043229,GO:0043231,GO:0043436,GO:0043603,GO:0044237,GO:0044238,GO:0044281,GO:0044424,GO:0044444,GO:0044464,GO:0044710,GO:…	K01480		fuNOG[21]	03M4N@ascNOG,0H433@dotNOG,0PI69@fuNOG,12RTM@opiNOG,15B93@pleNOG,COG0010@NOG,KOG2964@euNOG	NA|NA|NA	E	Arginase family
cF02780	441960.XP_002145827.1	5.2e-69	266.5					fuNOG[21]	03RPX@ascNOG,0IYAI@euNOG,0MBCH@euroNOG,0MSE8@eurotNOG,0PNSB@fuNOG,11QIQ@NOG,13SEZ@opiNOG	NA|NA|NA	S	Peptidase A4 family
cF02791	5022.CBX92674	4.6e-189	666.8	PPN1	GO:0000298,GO:0000322,GO:0000323,GO:0000324,GO:0000329,GO:0003674,GO:0003824,GO:0004309,GO:0005575,GO:0005622,GO:0005623,GO:0005634,GO:0005737,GO:0005773,GO:0005774,GO:0006082,GO:0006793,GO:0006797,GO:0006798,GO:0006950,GO:0007275,GO:0008150,GO:0008152,GO:0009056,GO:0009987,GO:0016020,GO:0016462,GO:0016787,GO:0016817,GO:0016818,GO:0031090,GO:0032501,GO:0032502,GO:0033554,GO:0043226,GO:0043227,GO:…	K06018		fuNOG[21]	04E0Z@ascNOG,0HBPX@dotNOG,0ISVA@euNOG,0QE5S@fuNOG,0Y1SY@NOG,13FDS@opiNOG,15FBB@pleNOG	NA|NA|NA	I	Calcineurin-like phosphoesterase
cF02792	13684.SNOT_14763	2.6e-137	493.8	PGAB	GO:0000272,GO:0003674,GO:0003824,GO:0004553,GO:0004650,GO:0005575,GO:0005576,GO:0005975,GO:0005976,GO:0007124,GO:0008150,GO:0008152,GO:0009056,GO:0009057,GO:0009987,GO:0010393,GO:0016049,GO:0016052,GO:0016787,GO:0016798,GO:0030447,GO:0040007,GO:0043170,GO:0044182,GO:0044238,GO:0044699,GO:0044763,GO:0045488,GO:0045490,GO:0070783,GO:0071704,GO:1901575	K01184,K01213	EPGALURSe	fuNOG[21]	03IPR@ascNOG,0H42T@dotNOG,0IE38@euNOG,0PFRD@fuNOG,12NEQ@opiNOG,15AQ8@pleNOG,COG5434@NOG	NA|NA|NA	G	Glycosyl hydrolases family 28
cF02794	5022.CBX91502	4.7e-35	153.7					fuNOG[21]	03VDH@ascNOG,0H8QU@dotNOG,0J3G3@euNOG,0PSHX@fuNOG,0XV98@NOG,13WXS@opiNOG,15F13@pleNOG	NA|NA|NA	S	LysM domain
cF02842	426418.XP_001942211.1	3.8e-60	238.4	FG08432.1	GO:0003674,GO:0005488,GO:0005515,GO:0005575,GO:0005622,GO:0005623,GO:0005737,GO:0005777,GO:0005778,GO:0006461,GO:0006605,GO:0006625,GO:0006810,GO:0006886,GO:0006996,GO:0007031,GO:0007275,GO:0008104,GO:0008150,GO:0009987,GO:0015031,GO:0016020,GO:0016043,GO:0016482,GO:0016558,GO:0016560,GO:0017038,GO:0022607,GO:0030674,GO:0031090,GO:0031903,GO:0032501,GO:0032502,GO:0033036,GO:0033365,GO:0034613,GO:…			fuNOG[21]	03RSU@ascNOG,0H7QG@dotNOG,0IXAB@euNOG,0PNSG@fuNOG,11JW1@NOG,13RV5@opiNOG,15BU0@pleNOG	NA|NA|NA	S	Inherit from ascNOG: Conserved hypothetical protein
cF02857	40559.EDN32735	1.6e-166	592.8	FG03439.1		K11517		fuNOG[21]	03NHM@ascNOG,0PG98@fuNOG,1379H@opiNOG,COG1304@NOG,KOG0538@euNOG	NA|NA|NA	C	Dehydrogenase
cF02881	164328.Phyra75232	5.2e-134	482.6	ABNA	GO:0000272,GO:0003674,GO:0003824,GO:0004553,GO:0005575,GO:0005576,GO:0005975,GO:0005976,GO:0008150,GO:0008152,GO:0009056,GO:0009057,GO:0009987,GO:0010383,GO:0010410,GO:0016052,GO:0016787,GO:0016798,GO:0043170,GO:0044036,GO:0044237,GO:0044238,GO:0044260,GO:0044699,GO:0044763,GO:0046558,GO:0071554,GO:0071704,GO:0071840,GO:1901575,GO:2000895	K06113		euNOG[57]	0IFT5@euNOG,COG3507@NOG	NA|NA|NA	G	Arabinan endo-1,5-alpha-L-arabinosidase
cF02911	33178.CADATEAP00009517	3e-111	407.5					fuNOG[21]	03NKR@ascNOG,0IJUK@euNOG,0M4F3@euroNOG,0PIPE@fuNOG,0Y3PH@NOG,13MKG@opiNOG	NA|NA|NA	S	Inherit from ascNOG: Conserved hypothetical protein
cF02929	861557.XP_003301889.1	1e-65	256.5					fuNOG[21]	03RVH@ascNOG,0IXRZ@euNOG,0PPA0@fuNOG,0YB2U@NOG,13RKX@opiNOG	NA|NA|NA
cF02930	117187.FVEG_12295T0	1.1e-40	171.4	FG11190.1				fuNOG[21]	03TQ0@ascNOG,0J08G@euNOG,0PQT1@fuNOG,0SBUV@hypNOG,0X0MV@necNOG,1203S@NOG,13UAA@opiNOG,19T4K@sordNOG	NA|NA|NA	S	ribonuclease
cF02985	426418.XP_001937272.1	3.9e-181	640.2	FG11228.1				fuNOG[21]	03IZT@ascNOG,0H3T8@dotNOG,0PJ5E@fuNOG,13JPN@opiNOG,15AIX@pleNOG,COG2303@NOG,KOG1238@euNOG	NA|NA|NA	E	GMC oxidoreductase
cF03026	29850.GGTG_13213T0	2.2e-08	65.1					NOG[107]	126CP@NOG	NA|NA|NA	S	Secreted protein
cF03044	5062.CADAORAP00000499	0	1171	MNDA	GO:0005575,GO:0005576	K01192		fuNOG[21]	03YI4@ascNOG,0PGS5@fuNOG,12NA1@opiNOG,COG3250@NOG,KOG2230@euNOG	NA|NA|NA	G	Exoglycosidase that cleaves the single beta-linked mannose residue from the non-reducing end of all N-linked glycoprotein oligosaccharides. Involved in the degradation of mannan and galactomannan (By similarity)
cF03083	33178.CADATEAP00002232	1e-66	259.2					euNOG[57]	0IJ4I@euNOG,11KFS@NOG	NA|NA|NA	S	Conserved hypothetical protein
cF03114	5061.CADANGAP00005274	1.9e-40	171.4					fuNOG[21]	03VDH@ascNOG,0J3G3@euNOG,0PSHX@fuNOG,0XV98@NOG,13WXS@opiNOG	NA|NA|NA	S	LysM domain
cF03148	861557.XP_003306020.1	1.2e-73	282	FG06770.1				fuNOG[21]	03S7T@ascNOG,0H7G5@dotNOG,0IV9Z@euNOG,0PQ28@fuNOG,11IKY@NOG,13RBW@opiNOG,15BTS@pleNOG	NA|NA|NA	U	Protein of unknown function (DUF1183)
cF03171	5180.EDO02733	3.4e-196	689.5	FG02206.1	GO:0003674,GO:0003824,GO:0004053,GO:0005575,GO:0005622,GO:0005623,GO:0005737,GO:0005783,GO:0006082,GO:0006520,GO:0006807,GO:0006950,GO:0008150,GO:0008152,GO:0009987,GO:0016787,GO:0016810,GO:0016813,GO:0019752,GO:0033554,GO:0043226,GO:0043227,GO:0043229,GO:0043231,GO:0043436,GO:0044237,GO:0044238,GO:0044281,GO:0044424,GO:0044444,GO:0044464,GO:0044699,GO:0044710,GO:0044763,GO:0050896,GO:0051716,GO:…	K01480		fuNOG[21]	03J00@ascNOG,0PI69@fuNOG,12RTM@opiNOG,COG0010@NOG,KOG2964@euNOG	NA|NA|NA	E	agmatinase
cF03197	5059.CADAFLAP00004050	9.7e-141	505.8					fuNOG[21]	03MWW@ascNOG,0IJFV@euNOG,0PHWY@fuNOG,0XPUV@NOG,13KXY@opiNOG	NA|NA|NA	S	Arylsulfotransferase (ASST)
cF03199	5085.CADAFUBP00001063	2.6e-66	257.7	FG02616.1				fuNOG[21]	03P61@ascNOG,0IVRN@euNOG,0MBAF@euroNOG,0MU1C@eurotNOG,0PKMB@fuNOG,0ZVVU@NOG,13I6H@opiNOG	NA|NA|NA	S	Alpha beta fold family hydrolase
cF03203	246410.XP_001247715.1	8.4e-08	63.5					fuNOG[21]	03W1W@ascNOG,0J84Z@euNOG,0M9HF@euroNOG,0PTII@fuNOG,0ZGVU@NOG,12IJ5@onyNOG,13ZMX@opiNOG	NA|NA|NA
cF03204	246410.XP_001247715.1	1.1e-11	75.9					fuNOG[21]	03W1W@ascNOG,0J84Z@euNOG,0M9HF@euroNOG,0PTII@fuNOG,0ZGVU@NOG,12IJ5@onyNOG,13ZMX@opiNOG	NA|NA|NA
cF03253	140110.NechaP41810	1.4e-194	684.9	FG03034.1		K00108		fuNOG[21]	03M37@ascNOG,0PI4D@fuNOG,0SNE7@hypNOG,0WY2U@necNOG,12QUV@opiNOG,1A1YG@sordNOG,COG2303@NOG,KOG1238@euNOG	NA|NA|NA	E	GMC oxidoreductase
cF03258	500485.XP_002564777.1	2.8e-115	421					fuNOG[21]	03MMZ@ascNOG,0IR8Z@euNOG,0M7ZX@euroNOG,0MRCZ@eurotNOG,0PMQH@fuNOG,13KCN@opiNOG,COG0277@NOG	NA|NA|NA	C	FAD binding domain protein
cF03259	515849.XP_001907562.1	3e-118	431					fuNOG[21]	03NZ9@ascNOG,0PIV8@fuNOG,12TR4@opiNOG,19WSM@sordNOG,1A946@sorNOG,COG2124@NOG,KOG0156@euNOG	NA|NA|NA	Q	Cytochrome P450
cF03282	578455.XP_003651098.1	2.3e-75	288.1	SUB7	GO:0000322,GO:0000323,GO:0000324,GO:0000328,GO:0003674,GO:0003824,GO:0004175,GO:0004252,GO:0005575,GO:0005576,GO:0005622,GO:0005623,GO:0005737,GO:0005773,GO:0005775,GO:0007039,GO:0008150,GO:0008152,GO:0008233,GO:0008236,GO:0009056,GO:0009057,GO:0009987,GO:0010467,GO:0016485,GO:0016787,GO:0017171,GO:0019538,GO:0030163,GO:0031974,GO:0043170,GO:0043226,GO:0043227,GO:0043229,GO:0043231,GO:0043233,GO:…	K01336		fuNOG[21]	03NC6@ascNOG,0CTYQ@chaNOG,0PGE1@fuNOG,13IFF@opiNOG,19V6I@sordNOG,1ADR2@sorNOG,COG1404@NOG,KOG1153@euNOG	NA|NA|NA	O	Peptidase inhibitor I9
cF03315	39416.CAZ80568	2.3e-158	564.3	PHO5	GO:0000322,GO:0000323,GO:0000324,GO:0001403,GO:0002036,GO:0002038,GO:0003674,GO:0003824,GO:0003993,GO:0004721,GO:0004725,GO:0005575,GO:0005576,GO:0005618,GO:0005622,GO:0005623,GO:0005737,GO:0005773,GO:0005783,GO:0005794,GO:0005886,GO:0006464,GO:0006470,GO:0006725,GO:0006766,GO:0006767,GO:0006772,GO:0006790,GO:0006793,GO:0006796,GO:0006807,GO:0006950,GO:0007124,GO:0007154,GO:0008150,GO:0008152,GO:…	K01078	ACP1e,THMDPe,THMPe	fuNOG[21]	03KM9@ascNOG,0PHNG@fuNOG,11FS8@NOG,12R6E@opiNOG,KOG1382@euNOG	NA|NA|NA	S	acid phosphatase
cF03336	526221.XP_003004170.1	3e-11	73.6					fuNOG[21]	041C3@ascNOG,0JIIT@euNOG,0PZVU@fuNOG,1172I@NOG,14A1Q@opiNOG,19TNB@sordNOG	NA|NA|NA
cF03377	573729.XP_003664164.1	4.3e-80	303.5					fuNOG[21]	03QAV@ascNOG,0CV03@chaNOG,0IVT9@euNOG,0PMAI@fuNOG,0XS8F@NOG,13JK2@opiNOG,19RDB@sordNOG,1AABG@sorNOG	NA|NA|NA	S	Glycoside hydrolase family 43 protein
cF03425	441959.XP_002482677.1	1.6e-24	118.2		GO:0005575,GO:0005576			fuNOG[21]	040YH@ascNOG,0JH2D@euNOG,0M9A2@euroNOG,0MP05@eurotNOG,0PYP3@fuNOG,11CY3@NOG,148PY@opiNOG	NA|NA|NA
cF03452	5022.CBX93548	7.6e-75	285.8					fuNOG[21]	03SDA@ascNOG,0H7UW@dotNOG,0IYEY@euNOG,0PPAG@fuNOG,11PKN@NOG,13RPE@opiNOG,15A15@pleNOG	NA|NA|NA	S	Inherit from ascNOG: Conserved hypothetical protein
cF03453	559298.XP_002627639.1	1.4e-33	149.1	FG00935.1				fuNOG[21]	03TMH@ascNOG,0J0A2@euNOG,0M8FY@euroNOG,0PQQR@fuNOG,0XVMK@NOG,12HWG@onyNOG,13U8D@opiNOG	NA|NA|NA
cF03481	5022.CBX96720	8.3e-152	542.7					fuNOG[21]	03RC9@ascNOG,0HB5S@dotNOG,0IFX7@euNOG,0PN1M@fuNOG,10F4M@NOG,13PR5@opiNOG,15BAH@pleNOG	NA|NA|NA	S	Berberine and berberine like
cF03483	5180.EDN98257	2.7e-41	174.9	FG09390.1	GO:0007275,GO:0008150,GO:0032501,GO:0032502,GO:0043581,GO:0044699,GO:0044707,GO:0044767,GO:0048856			fuNOG[21]	03PAT@ascNOG,0IVPP@euNOG,0PGPK@fuNOG,11X3Q@NOG,13NXV@opiNOG	NA|NA|NA
cF03515	13684.SNOT_11248	2.3e-247	860.5	FG09085.1	GO:0005575,GO:0005576	K19069		fuNOG[21]	03P71@ascNOG,0H6VY@dotNOG,0IUIF@euNOG,0PK4V@fuNOG,13HSA@opiNOG,157HR@pleNOG,COG2303@NOG	NA|NA|NA	E	GMC oxidoreductase
cF03532	5022.CBX92990	2.7e-55	222.2					fuNOG[21]	04CYI@ascNOG,0H9MA@dotNOG,0KQVX@euNOG,0QCDY@fuNOG,112IA@NOG,13AFI@opiNOG,159KG@pleNOG	NA|NA|NA	S	Domain of unknown function (DUF1996)
cF03543	426418.XP_001941363.1	9e-72	276.2					fuNOG[21]	03P9B@ascNOG,0H7E1@dotNOG,0IJ4I@euNOG,0PMB9@fuNOG,11KFS@NOG,13I5N@opiNOG,15DA9@pleNOG	NA|NA|NA	S	Inherit from ascNOG: Conserved hypothetical protein
cF03553	5062.CADAORAP00000239	2.3e-231	807.4		GO:0005575,GO:0005576			fuNOG[21]	03X9F@ascNOG,0JBBG@euNOG,0PVVB@fuNOG,14113@opiNOG,COG1472@NOG	NA|NA|NA	G	Glycosyl hydrolase family 3 C-terminal domain
cF03565	861557.XP_003302012.1	0	1677.9	FG07940.1	GO:0000271,GO:0003674,GO:0003824,GO:0003980,GO:0005488,GO:0005509,GO:0005515,GO:0005537,GO:0005575,GO:0005622,GO:0005623,GO:0005737,GO:0005783,GO:0005788,GO:0005975,GO:0005976,GO:0006011,GO:0006073,GO:0006077,GO:0006078,GO:0006139,GO:0006464,GO:0006486,GO:0006725,GO:0006753,GO:0006793,GO:0006796,GO:0006807,GO:0006950,GO:0006984,GO:0006986,GO:0007154,GO:0007165,GO:0008150,GO:0008152,GO:0008194,GO:…	K11718		fuNOG[21]	03KA0@ascNOG,0H37J@dotNOG,0PHC3@fuNOG,0XRK6@NOG,12Q6Z@opiNOG,159R2@pleNOG,KOG1879@euNOG	NA|NA|NA	O	UDP-glucose:Glycoprotein Glucosyltransferase
cF03566	5022.CBY01944	2.9e-182	643.3	PEP2	GO:0000322,GO:0000323,GO:0000324,GO:0000328,GO:0003674,GO:0003824,GO:0005575,GO:0005576,GO:0005622,GO:0005623,GO:0005737,GO:0005739,GO:0005773,GO:0005775,GO:0006508,GO:0006914,GO:0006950,GO:0007154,GO:0008150,GO:0008152,GO:0008233,GO:0009056,GO:0009057,GO:0009267,GO:0009605,GO:0009987,GO:0009991,GO:0010324,GO:0016043,GO:0016044,GO:0016237,GO:0016787,GO:0019538,GO:0030163,GO:0031667,GO:0031668,GO:…	K01381		fuNOG[21]	03IA7@ascNOG,0H3BS@dotNOG,0PFB5@fuNOG,0XNV7@NOG,12RM2@opiNOG,157B2@pleNOG,KOG1339@euNOG	NA|NA|NA	O	Eukaryotic aspartyl protease
cF03585	40559.EDN31956	2.2e-123	447.6	FG11350.1	GO:0007275,GO:0008150,GO:0032501,GO:0032502,GO:0043581,GO:0044699,GO:0044707,GO:0044767,GO:0048856			fuNOG[21]	03NR7@ascNOG,0IVGU@euNOG,0PMGB@fuNOG,0XQXY@NOG,12SIS@opiNOG	NA|NA|NA	S	Inherit from NOG: exported protein
cF03587	5022.CBX90360	1.1e-62	245.4	CIG				fuNOG[21]	03RVR@ascNOG,0H7YJ@dotNOG,0IX6Q@euNOG,0PNVY@fuNOG,11S6R@NOG,13SAU@opiNOG,15DVQ@pleNOG	NA|NA|NA
cF03602	33178.CADATEAP00009291	2.5e-83	313.9	FG06506.1				fuNOG[21]	03SGX@ascNOG,0IX32@euNOG,0M8JD@euroNOG,0MN0C@eurotNOG,0PP2H@fuNOG,11MM1@NOG,13R80@opiNOG	NA|NA|NA	S	Chitin binding domain
cF03621	162425.CADANIAP00002479	9.1e-81	307.4		GO:0000272,GO:0003674,GO:0003824,GO:0004553,GO:0005975,GO:0005976,GO:0008150,GO:0008152,GO:0009056,GO:0009057,GO:0009251,GO:0016052,GO:0016787,GO:0016798,GO:0042972,GO:0043170,GO:0044042,GO:0044238,GO:0071704,GO:1901575			fuNOG[21]	03PTE@ascNOG,0IIRU@euNOG,0M7M3@euroNOG,0MI5X@eurotNOG,0PK1Z@fuNOG,11FI3@NOG,13ABB@opiNOG	NA|NA|NA	G	endo-1,3(4)-beta-glucanase
cF03627	861557.XP_003302294.1	8.1e-56	221.9		GO:0005575,GO:0005622,GO:0005623,GO:0005634,GO:0005737,GO:0005783,GO:0005801,GO:0005829,GO:0006140,GO:0006810,GO:0006886,GO:0006888,GO:0008104,GO:0008150,GO:0009118,GO:0009894,GO:0009966,GO:0009987,GO:0010646,GO:0015031,GO:0016192,GO:0016482,GO:0019219,GO:0019220,GO:0019222,GO:0023051,GO:0030008,GO:0030811,GO:0031323,GO:0031329,GO:0032313,GO:0032318,GO:0032483,GO:0032991,GO:0033036,GO:0033121,GO:…			fuNOG[21]	03RIP@ascNOG,0H7Z3@dotNOG,0PRFI@fuNOG,13A16@opiNOG,15BYU@pleNOG,COG5122@NOG,KOG3369@euNOG	NA|NA|NA	U	Sybindin-like family
cF03635	861557.XP_003299784.1	3.6e-92	344.4	YOS9	GO:0001948,GO:0003674,GO:0005488,GO:0005515,GO:0005575,GO:0005622,GO:0005623,GO:0005737,GO:0005783,GO:0005788,GO:0005789,GO:0006508,GO:0006511,GO:0008150,GO:0008152,GO:0009056,GO:0009057,GO:0009987,GO:0010498,GO:0012505,GO:0016020,GO:0019538,GO:0019941,GO:0030163,GO:0030246,GO:0030433,GO:0031090,GO:0031974,GO:0032991,GO:0034099,GO:0042175,GO:0043161,GO:0043170,GO:0043226,GO:0043227,GO:0043229,GO:…	K10088		fuNOG[21]	03NJJ@ascNOG,0H93P@dotNOG,0PK6W@fuNOG,0XR8A@NOG,12N9Q@opiNOG,15DMS@pleNOG,KOG3394@euNOG	NA|NA|NA	O	Glucosidase II beta subunit-like protein
cF03639	51453.JGI4027	1.8e-27	129					fuNOG[21]	03SHR@ascNOG,0IKX1@euNOG,0PP3N@fuNOG,0Y1UN@NOG,13RTA@opiNOG,19RGC@sordNOG	NA|NA|NA	S	glycosyltransferase family 25 protein
cF03674	1047171.EFQ36854	1.5e-20	106.3					fuNOG[21]	03SBQ@ascNOG,0H8ZU@dotNOG,0IXMG@euNOG,0PNX0@fuNOG,11KC7@NOG,13SDH@opiNOG	NA|NA|NA	S	Inherit from fuNOG: Secreted protein
cF03683	578455.XP_003650178.1	3.3e-220	770.4					fuNOG[21]	03QCH@ascNOG,0CTZU@chaNOG,0IVS5@euNOG,0PK3X@fuNOG,0XNSB@NOG,12S0T@opiNOG,19V0K@sordNOG,1A8ZN@sorNOG	NA|NA|NA	G	glycoside hydrolase family 55 protein
cF03728	426418.XP_001938440.1	0	1556.2	VPS10	GO:0003674,GO:0005048,GO:0005488,GO:0005575,GO:0005622,GO:0005623,GO:0005737,GO:0005768,GO:0005770,GO:0005794,GO:0005802,GO:0006605,GO:0006623,GO:0006810,GO:0006886,GO:0006892,GO:0006896,GO:0007034,GO:0008104,GO:0008150,GO:0009987,GO:0010008,GO:0015031,GO:0016020,GO:0016192,GO:0016482,GO:0031090,GO:0031902,GO:0032588,GO:0033036,GO:0033218,GO:0033365,GO:0034613,GO:0042277,GO:0043226,GO:0043227,GO:…			fuNOG[21]	03MT5@ascNOG,0H6G9@dotNOG,0PFJT@fuNOG,0Y3W5@NOG,12SMY@opiNOG,1597A@pleNOG,KOG3511@euNOG	NA|NA|NA	U	Functions as a sorting receptor in the Golgi compartment required for the intracellular sorting and delivery of soluble vacuolar proteins, like carboxypeptidase Y (CPY) and proteinase A. Executes multiple rounds of sorting by cycling between the late Golgi and a prevacuolar endosome-like compartment (By similarity)
cF03743	13684.SNOT_01153	2.2e-63	248.1					fuNOG[21]	04CP6@ascNOG,0HA9J@dotNOG,0IHMJ@euNOG,0QCP1@fuNOG,0YAA5@NOG,13A63@opiNOG,15E4P@pleNOG	NA|NA|NA	S	Peroxidase
cF03757	29850.GGTG_09187T0	1.7e-55	222.2	FG07918.1				fuNOG[21]	03U6N@ascNOG,0J1YS@euNOG,0PQSH@fuNOG,0UD2M@magNOG,11WIA@NOG,13UVI@opiNOG,19N5I@sordNOG	NA|NA|NA
cF03791	500485.XP_002556869.1	3e-16	90.5	FG09064.1				fuNOG[21]	03MD7@ascNOG,0IJM2@euNOG,0M3EQ@euroNOG,0MJHI@eurotNOG,0PJIV@fuNOG,0YCG2@NOG,13NDR@opiNOG	NA|NA|NA	K	transcription factor
cF03836	573729.XP_003664588.1	1e-19	100.9			K18188		fuNOG[21]	03UYW@ascNOG,0CX4S@chaNOG,0J2NS@euNOG,0PSHG@fuNOG,129PY@NOG,13XFT@opiNOG,19TCW@sordNOG,1ACD0@sorNOG	NA|NA|NA	S	Inherit from ascNOG: cytochrome c oxidase assembly protein
cF03839	4896.SPBPJ4664.02.1	2.3e-07	63.2		GO:0005575,GO:0005618,GO:0005623,GO:0005886,GO:0007155,GO:0008150,GO:0009986,GO:0009987,GO:0010339,GO:0016020,GO:0022610,GO:0030312,GO:0044426,GO:0044462,GO:0044464,GO:0044699,GO:0044763,GO:0071944			fuNOG[21]	042CS@ascNOG,0JNCB@euNOG,0Q0DG@fuNOG,0ZJ7C@NOG,14D87@opiNOG	NA|NA|NA
cF03850	861557.XP_003303337.1	4.6e-118	429.9	EXG1	GO:0000003,GO:0000935,GO:0003006,GO:0003674,GO:0003824,GO:0004338,GO:0004553,GO:0005575,GO:0005576,GO:0005618,GO:0005619,GO:0005623,GO:0005975,GO:0005976,GO:0006073,GO:0007049,GO:0008150,GO:0008152,GO:0008422,GO:0009272,GO:0009277,GO:0009653,GO:0009987,GO:0010383,GO:0015926,GO:0016043,GO:0016787,GO:0016798,GO:0019953,GO:0022402,GO:0022413,GO:0022414,GO:0030154,GO:0030312,GO:0030428,GO:0030435,GO:…	K01210	13BGHe	fuNOG[21]	03NXA@ascNOG,0H9M4@dotNOG,0IHBU@euNOG,0PJVJ@fuNOG,12TM3@opiNOG,15A1J@pleNOG,COG2730@NOG	NA|NA|NA	G	Cellulase (glycosyl hydrolase family 5)
cF03870	5062.CADAORAP00010604	3.8e-76	290.4					fuNOG[21]	03WC3@ascNOG,0J81W@euNOG,0PU66@fuNOG,11RSP@NOG,1407M@opiNOG	NA|NA|NA
cF03897	222929.XP_003071653.1	1.1e-88	332					fuNOG[21]	03QWZ@ascNOG,0IWEP@euNOG,0M5W3@euroNOG,0PMYI@fuNOG,11QCS@NOG,12K1J@onyNOG,13Q9D@opiNOG	NA|NA|NA	S	LicD family
cF03900	140110.NechaP122895	1.2e-16	91.7			K18576		fuNOG[21]	03N8K@ascNOG,0IED9@euNOG,0PMUC@fuNOG,10PX7@NOG,13PJF@opiNOG	NA|NA|NA	G	Glycosyl hydrolase family 12
cF03924	13684.SNOT_00033	5.3e-162	576.2	PGAX	GO:0000272,GO:0003674,GO:0003824,GO:0004553,GO:0004650,GO:0005575,GO:0005576,GO:0005975,GO:0005976,GO:0008150,GO:0008152,GO:0009056,GO:0009057,GO:0010393,GO:0016052,GO:0016787,GO:0016798,GO:0043170,GO:0044238,GO:0045488,GO:0045490,GO:0071704,GO:1901575	K01213		fuNOG[21]	03N9T@ascNOG,0H55T@dotNOG,0IK0F@euNOG,0PG7M@fuNOG,13ICK@opiNOG,159ZJ@pleNOG,COG5434@NOG	NA|NA|NA	G	Glycosyl hydrolases family 28
cF04026	5022.CBX98301	0	1163.7					fuNOG[21]	04CAR@ascNOG,0HB4N@dotNOG,0IJ9H@euNOG,0PJNE@fuNOG,12T4S@opiNOG,15CN8@pleNOG,COG3537@NOG	NA|NA|NA	G	Glycosyl hydrolase family 92
cF04034	162425.CADANIAP00000039	2.4e-151	541.2	FG02330.1				fuNOG[21]	03K69@ascNOG,0MESN@euroNOG,0MS5U@eurotNOG,0PIEE@fuNOG,13IKG@opiNOG,COG2132@NOG,KOG1263@euNOG	NA|NA|NA	Q	Multicopper oxidase
cF04043	5062.CADAORAP00000714	0	1254.6	LACC	GO:0005575,GO:0005576			fuNOG[21]	03WFS@ascNOG,0MD6X@euroNOG,0MJGV@eurotNOG,0PGTY@fuNOG,12QYB@opiNOG,COG1874@NOG,KOG0496@euNOG	NA|NA|NA	G	Cleaves beta-linked terminal galactosyl residues from gangliosides, glycoproteins, and glycosaminoglycans (By similarity)
cF04080	426418.XP_001931865.1	1e-70	273.5	FG09826.1	GO:0008150,GO:0008152,GO:0009058,GO:0019748,GO:0030638,GO:0030639,GO:0044550,GO:0044710,GO:0044711,GO:0071704,GO:1901576			fuNOG[21]	03R43@ascNOG,0H797@dotNOG,0IWYM@euNOG,0PNEP@fuNOG,11KCK@NOG,13Q1V@opiNOG,1590G@pleNOG	NA|NA|NA
cF04105	229533.XP_389000.1	1.7e-144	518.1	FG08824.1				fuNOG[21]	03MZ9@ascNOG,0IMS6@euNOG,0PJ0S@fuNOG,0SK2T@hypNOG,0WW52@necNOG,13JYJ@opiNOG,19Q58@sordNOG,COG0277@NOG	NA|NA|NA	C	Berberine and berberine like
cF04138	861557.XP_003306277.1	1.4e-99	368.2	FG05629.1				fuNOG[21]	03UYT@ascNOG,0H3AX@dotNOG,0J31N@euNOG,0PSJI@fuNOG,12461@NOG,13WE0@opiNOG	NA|NA|NA	S	Inherit from euNOG: Conserved hypothetical protein
cF04140	13684.SNOT_02625	1.9e-234	817.4		GO:0000322,GO:0000323,GO:0000324,GO:0005575,GO:0005622,GO:0005623,GO:0005634,GO:0005737,GO:0005773,GO:0005783,GO:0005829,GO:0016020,GO:0043226,GO:0043227,GO:0043229,GO:0043231,GO:0044424,GO:0044444,GO:0044464			fuNOG[21]	03JQK@ascNOG,0H4F3@dotNOG,0PHZS@fuNOG,12QK0@opiNOG,15CZR@pleNOG,COG0737@NOG,KOG4419@euNOG	NA|NA|NA	F	Calcineurin-like phosphoesterase
cF04150	5061.CADANGAP00013437	2.4e-143	514.2			K05917		fuNOG[21]	03RZC@ascNOG,0M4Z2@euroNOG,0PNZR@fuNOG,13S3Y@opiNOG,COG2124@NOG,KOG0684@euNOG	NA|NA|NA	Q	Cytochrome P450
cF04153	140110.NechaP92582	1.7e-81	307.8	FG06017.1	GO:0005575,GO:0005576			fuNOG[21]	03RFH@ascNOG,0IWF2@euNOG,0PNF2@fuNOG,0SD21@hypNOG,0WXZX@necNOG,11GQ0@NOG,13PX5@opiNOG,19IUW@sordNOG	NA|NA|NA	S	Necrosis inducing protein (NPP1)
cF04166	1047171.EFQ32888	4.2e-85	320.1			K05972		fuNOG[21]	03Q52@ascNOG,0H3NR@dotNOG,0IJXQ@euNOG,0PI6W@fuNOG,13HMR@opiNOG,COG3509@NOG	NA|NA|NA	O	Esterase PHB depolymerase
cF04170	13684.SNOT_02920	5.2e-149	532.7	OCH1	GO:0000009,GO:0000030,GO:0000032,GO:0000136,GO:0000137,GO:0000139,GO:0003674,GO:0003824,GO:0005575,GO:0005622,GO:0005623,GO:0005634,GO:0005737,GO:0005783,GO:0005789,GO:0005794,GO:0005795,GO:0005829,GO:0005975,GO:0005976,GO:0006056,GO:0006057,GO:0006080,GO:0006464,GO:0006486,GO:0006487,GO:0006491,GO:0008150,GO:0008152,GO:0009058,GO:0009059,GO:0009100,GO:0009101,GO:0009311,GO:0009987,GO:0012505,GO:…	K05528,K05534		fuNOG[21]	03J68@ascNOG,0H587@dotNOG,0IHVC@euNOG,0PII4@fuNOG,12QMS@opiNOG,157RG@pleNOG,COG3774@NOG	NA|NA|NA	G	Glycosyltransferase sugar-binding region containing DXD motif
cF04184	771870.XP_003344866.1	1.8e-153	548.1		GO:0003008,GO:0003674,GO:0003824,GO:0003990,GO:0004091,GO:0004104,GO:0006066,GO:0006576,GO:0006807,GO:0007154,GO:0007267,GO:0007268,GO:0007271,GO:0008150,GO:0008152,GO:0009308,GO:0009987,GO:0016787,GO:0016788,GO:0019226,GO:0019695,GO:0023052,GO:0032501,GO:0034641,GO:0035637,GO:0042439,GO:0044106,GO:0044237,GO:0044281,GO:0044699,GO:0044700,GO:0044707,GO:0044710,GO:0044763,GO:0050877,GO:0052689,GO:…			fuNOG[21]	03JRS@ascNOG,0PKN8@fuNOG,13NZ4@opiNOG,19J89@sordNOG,1ADCB@sorNOG,COG2272@NOG,KOG4389@euNOG	NA|NA|NA	T	Carboxylesterase family
cF04203	13684.SNOT_02018	1.6e-95	355.1	PEP1	GO:0005575,GO:0005576,GO:0006508,GO:0008150,GO:0008152,GO:0019538,GO:0043170,GO:0044238,GO:0071704	K01379,K06004		fuNOG[21]	03JP4@ascNOG,0H6GQ@dotNOG,0PH8I@fuNOG,0XNV7@NOG,12NU9@opiNOG,158EX@pleNOG,KOG1339@euNOG	NA|NA|NA	O	Secreted aspartic endopeptidase that allows assimilation of proteinaceous substrates. Can catalyze hydrolysis of the major structural proteins of basement membrane, elastin, collagen, and laminin
cF04208	29875.EHK20939	2e-79	301.6					fuNOG[21]	03WQI@ascNOG,0J8WI@euNOG,0PUHN@fuNOG,122CK@NOG,143DE@opiNOG	NA|NA|NA
cF04255	13684.SNOT_11303	9.9e-51	205.7		GO:0005575,GO:0005576			fuNOG[21]	03MNG@ascNOG,0H5E7@dotNOG,0IJXI@euNOG,0PJE8@fuNOG,0Z8DT@NOG,13NPN@opiNOG,158PV@pleNOG	NA|NA|NA	G	Glycosyl hydrolase family 45
cF04274	13684.SNOT_10706	4e-69	267.3					fuNOG[21]	04C6N@ascNOG,0HBEI@dotNOG,0IMBB@euNOG,0QD4Y@fuNOG,111W1@NOG,139PF@opiNOG,159K2@pleNOG	NA|NA|NA
cF04308	5022.CBX97865	8.4e-177	625.5	FG00530.1		K01078,K01083		fuNOG[21]	03P1Q@ascNOG,0H48J@dotNOG,0PGMK@fuNOG,11FS8@NOG,12QIS@opiNOG,158RD@pleNOG,KOG1382@euNOG	NA|NA|NA	S	Pfam:Acid_phosphat_A
cF04310	5022.CBX94886	6.1e-215	752.3					fuNOG[21]	04CU9@ascNOG,0H9WY@dotNOG,0QCI3@fuNOG,12TED@opiNOG,15E0G@pleNOG,COG2272@NOG,KOG4389@euNOG	NA|NA|NA	T	Carboxylesterase family
cF04409	29875.EHK20454	3.7e-178	630.2	FG10604.1	GO:0003674,GO:0003824,GO:0008150,GO:0008152,GO:0016491,GO:0016679,GO:0016682,GO:0044710,GO:0052716,GO:0055114	K19791		fuNOG[21]	03NKM@ascNOG,0PGU0@fuNOG,0SCH8@hypNOG,13IAH@opiNOG,19IMX@sordNOG,COG2132@NOG,KOG1263@euNOG	NA|NA|NA	Q	Multicopper oxidase
cF04418	29850.GGTG_02981T0	6.4e-253	879					fuNOG[21]	03NWG@ascNOG,0IIDF@euNOG,0PK45@fuNOG,0U7C2@magNOG,134J0@opiNOG,1A1DK@sordNOG,COG0726@NOG	NA|NA|NA	G	Polysaccharide deacetylase
cF04430	40559.EDN28369	3.2e-85	320.9	FG06110.1	GO:0005575,GO:0005576			fuNOG[21]	03QWV@ascNOG,0IWWC@euNOG,0PNFI@fuNOG,0YBW9@NOG,13QH3@opiNOG	NA|NA|NA	G	endo-glucanase
cF04493	13684.SNOT_06842	7.2e-144	516.2	FGSG_09811				fuNOG[21]	03MGX@ascNOG,0H4CY@dotNOG,0IEZ3@euNOG,0PHK2@fuNOG,0XRFH@NOG,13KQT@opiNOG,159NU@pleNOG	NA|NA|NA	S	Inherit from ascNOG: SH3 domain-containing protein
cF04506	426418.XP_001941120.1	2.7e-44	183.3	FG11205.1	GO:0005575,GO:0005576,GO:0005622,GO:0005623,GO:0008150,GO:0044046,GO:0044403,GO:0044419,GO:0044464,GO:0051701,GO:0051704,GO:0052047,GO:0052048,GO:0052051,GO:0052211			fuNOG[21]	03T2G@ascNOG,0H7KT@dotNOG,0IYFD@euNOG,0PQ64@fuNOG,11YGH@NOG,13SJR@opiNOG,15CBW@pleNOG	NA|NA|NA	S	Cerato-platanin
cF04592	5059.CADAFLAP00005509	1.4e-185	655.2	RGLA	GO:0000272,GO:0003674,GO:0003824,GO:0005575,GO:0005576,GO:0005975,GO:0005976,GO:0008150,GO:0008152,GO:0009056,GO:0009057,GO:0010393,GO:0016052,GO:0016829,GO:0016835,GO:0016837,GO:0043170,GO:0044238,GO:0045488,GO:0045490,GO:0071704,GO:1901575	K18195		fuNOG[21]	0IJA7@euNOG,0PIYF@fuNOG,0YMZF@NOG,12R6F@opiNOG	NA|NA|NA	G	Pectinolytic enzymes consist of four classes of enzymes pectin lyase, polygalacturonase, pectin methylesterase and rhamnogalacturonase. Degrades the rhamnogalacturonan I (RG-I) backbone of pectin
cF04601	51453.JGI108686	3.4e-78	298.1					fuNOG[21]	03R58@ascNOG,0IWAZ@euNOG,0PNMV@fuNOG,0SGQ7@hypNOG,0Y9NG@NOG,13QN3@opiNOG,19RWV@sordNOG	NA|NA|NA	S	Eukaryotic aspartyl protease
cF04651	554155.XP_002844067.1	6.1e-95	353.6	FG03601.1	GO:0003674,GO:0003824,GO:0004091,GO:0008150,GO:0008152,GO:0016787,GO:0016788,GO:0052689			fuNOG[21]	03IH9@ascNOG,0M4SH@euroNOG,0PM0V@fuNOG,12F4V@onyNOG,12PS2@opiNOG,COG2272@NOG,KOG4389@euNOG	NA|NA|NA	T	Triacylglycerol lipase
cF04683	13684.SNOT_00220	5.7e-264	916.4					fuNOG[21]	03QFF@ascNOG,0H9VC@dotNOG,0IJ2Z@euNOG,0PGQT@fuNOG,110V0@NOG,12UAB@opiNOG,1597X@pleNOG	NA|NA|NA	S	Glyoxal oxidase N-terminus
cF04719	861557.XP_003296954.1	0	1091.6					fuNOG[21]	03KHB@ascNOG,0H3WF@dotNOG,0IF3E@euNOG,0PHIS@fuNOG,0XPKX@NOG,12Q6P@opiNOG,159P1@pleNOG	NA|NA|NA	S	Domain of unknown function (DUF1793)
cF04828	573729.XP_003662375.1	1.1e-42	179.1	FG00028.1	GO:0003674,GO:0003824,GO:0005575,GO:0005576,GO:0008150,GO:0008152,GO:0008233,GO:0008237,GO:0016787,GO:0044046,GO:0044403,GO:0044419,GO:0051701,GO:0051704,GO:0052047,GO:0052048,GO:0052051,GO:0052211,GO:0070011	K07762		fuNOG[21]	03M8D@ascNOG,0CWF7@chaNOG,0IFMM@euNOG,0PIAE@fuNOG,0XPH7@NOG,1300I@opiNOG,19PI8@sordNOG,1AAPE@sorNOG	NA|NA|NA	O	Pregnancy-associated plasma protein-A
cF04891	36630.CADNFIAP00003570	4.5e-13	81.3					fuNOG[21]	043DF@ascNOG,0K0R1@euNOG,0ME2B@euroNOG,0MS99@eurotNOG,0Q2QY@fuNOG,10APE@NOG,14GNG@opiNOG	NA|NA|NA
cF04899	13684.SNOT_02312	1.7e-09	67.8					fuNOG[21]	041EQ@ascNOG,0H93B@dotNOG,0JKRI@euNOG,0Q008@fuNOG,0Z4TP@NOG,14BRG@opiNOG	NA|NA|NA
cF04906	5022.CBX91827	2.4e-85	322.8	FG10237.1	GO:0000003,GO:0000282,GO:0000902,GO:0000910,GO:0003006,GO:0005575,GO:0005622,GO:0005623,GO:0005737,GO:0005856,GO:0005886,GO:0005887,GO:0005933,GO:0005935,GO:0005938,GO:0005940,GO:0007049,GO:0007105,GO:0007114,GO:0007120,GO:0007163,GO:0007275,GO:0008150,GO:0009653,GO:0009987,GO:0010564,GO:0010948,GO:0016020,GO:0016021,GO:0016043,GO:0019953,GO:0019954,GO:0022402,GO:0022414,GO:0022603,GO:0030010,GO:…	K18637		fuNOG[21]	03IK6@ascNOG,0H8AV@dotNOG,0IJ52@euNOG,0PFMN@fuNOG,11NXB@NOG,13M26@opiNOG,1580S@pleNOG	NA|NA|NA	S	CADG
cF04929	5022.CBX90641	2.2e-13	80.9					fuNOG[21]	04CFR@ascNOG,0HAT2@dotNOG,0IM2T@euNOG,0QCW6@fuNOG,1123V@NOG,139YK@opiNOG,15C2Z@pleNOG	NA|NA|NA
cF04940	5507.FOXG_11698P0	4.1e-54	217.2	FG03968.1				fuNOG[21]	03MU0@ascNOG,0IIWN@euNOG,0PKTY@fuNOG,0SJ7J@hypNOG,11S31@NOG,12UE0@opiNOG,19ND1@sordNOG	NA|NA|NA	S	Glycosyl hydrolase family 61
cF04952	5180.EDN93353	5.6e-161	572.4					fuNOG[21]	03WFD@ascNOG,0JAZA@euNOG,0PU9C@fuNOG,1411P@opiNOG,COG3386@NOG	NA|NA|NA	G	Inherit from COG: SMP-30 gluconolaconase LRE domain protein
cF04993	5062.CADAORAP00004463	1.3e-158	564.7	RHGB	GO:0000272,GO:0003674,GO:0003824,GO:0005575,GO:0005576,GO:0005975,GO:0005976,GO:0008150,GO:0008152,GO:0009056,GO:0009057,GO:0010393,GO:0016052,GO:0016829,GO:0016835,GO:0016837,GO:0043170,GO:0044238,GO:0045488,GO:0045490,GO:0046576,GO:0071704,GO:1901575	K01184,K18580		NOG[107]	10FN4@NOG	NA|NA|NA	G	rhamnogalacturonan alpha-L-rhamnopyranosyl-(1->4)-alpha-D-galactopyranosyluronide lyase activity
cF05029	526221.XP_003008092.1	8.1e-20	102.1					fuNOG[21]	03TH7@ascNOG,0J218@euNOG,0PRNM@fuNOG,12CRG@NOG,13VN2@opiNOG	NA|NA|NA
cF05030	7227.FBpp0084219	4.2e-15	88.2		GO:0003674,GO:0005198,GO:0005201,GO:0005575,GO:0031012			artNOG[6]	03EZB@artNOG,0AXYX@biNOG,0H117@dipNOG,0I1JS@droNOG,0KBET@euNOG,0T1WH@inNOG,0WA66@meNOG,10NBN@NOG,14RG7@opiNOG	NA|NA|NA	S	ChtBD2
cF05035	5507.FOXG_13489P0	8.6e-111	406	FG11350.1	GO:0007275,GO:0008150,GO:0032501,GO:0032502,GO:0043581,GO:0044699,GO:0044707,GO:0044767,GO:0048856			fuNOG[21]	03NR7@ascNOG,0IVGU@euNOG,0PMGB@fuNOG,0SIW9@hypNOG,0XQXY@NOG,12SIS@opiNOG,19NMX@sordNOG	NA|NA|NA	S	Inherit from NOG: exported protein
cF05072	164328.Phyra76943	1.4e-132	478			K01224		euNOG[57]	0IFS4@euNOG,COG3867@NOG	NA|NA|NA	G	arabinogalactan endo-1,4-beta-galactosidase
cF05104	5061.CADANGAP00004584	5e-166	589.3	XGHA	GO:0005575,GO:0005576	K01213		fuNOG[21]	03QC4@ascNOG,0IQ3B@euNOG,0PKB6@fuNOG,13K8G@opiNOG,COG5434@NOG	NA|NA|NA	G	Pectinolytic enzyme involved in the degradation of xylogalacturonan (xga), a galacturonan backbone heavily substituted with xylose, and which is one important component of the hairy regions of pectin. Activity requires a galacturonic acid backbone substituted with xylose (By similarity)
cF05107	426418.XP_001937246.1	1.3e-09	67.4	FG02110.1				fuNOG[21]	03VE9@ascNOG,0H8VG@dotNOG,0J2DC@euNOG,0PSWX@fuNOG,126WT@NOG,13W85@opiNOG,15CC5@pleNOG	NA|NA|NA
cF05118	578458.XP_003034839.1	9.2e-23	114					fuNOG[21]	01FH7@agarNOG,097IA@basNOG,0IF33@euNOG,0PQTA@fuNOG,13NG8@opiNOG,COG1680@NOG	NA|NA|NA	V	Beta-lactamase
cF05119	5061.CADANGAP00004004	1.5e-85	322.4					fuNOG[21]	03T9Q@ascNOG,0IYG8@euNOG,0MCKI@euroNOG,0MS2S@eurotNOG,0PQ3Z@fuNOG,0YAZ8@NOG,13SPB@opiNOG	NA|NA|NA	S	Ubiquitin 3 binding protein But2 C-terminal domain
cF05145	5022.CBX99398	6.8e-30	137.5					fuNOG[21]	0421U@ascNOG,0JIFY@euNOG,0PZM6@fuNOG,0Z49Q@NOG,14B3U@opiNOG	NA|NA|NA
cF05174	426418.XP_001936062.1	9e-174	615.5	DPH1	GO:0005575,GO:0005622,GO:0005623,GO:0005634,GO:0005737,GO:0005829,GO:0006417,GO:0006464,GO:0008150,GO:0008152,GO:0009058,GO:0009889,GO:0009987,GO:0010468,GO:0010556,GO:0010608,GO:0017182,GO:0017183,GO:0018193,GO:0018202,GO:0019222,GO:0019538,GO:0031323,GO:0031326,GO:0032268,GO:0036211,GO:0043170,GO:0043226,GO:0043227,GO:0043229,GO:0043231,GO:0043412,GO:0044237,GO:0044238,GO:0044249,GO:0044260,GO:…	K07561		fuNOG[21]	03JYD@ascNOG,0H6NT@dotNOG,0PH0C@fuNOG,12R5M@opiNOG,15A5F@pleNOG,COG1736@NOG,KOG2648@euNOG	NA|NA|NA	J	Putative diphthamide synthesis protein
cF05180	36630.CADNFIAP00003116	4.3e-54	217.2		GO:0005575,GO:0005576			fuNOG[21]	043D6@ascNOG,0JAVC@euNOG,0ME2Y@euroNOG,0MRKZ@eurotNOG,0PVBI@fuNOG,0Y5I0@NOG,142JF@opiNOG	NA|NA|NA
cF05236	5061.CADANGAP00004309	2.1e-187	660.6		GO:0000272,GO:0003674,GO:0003824,GO:0004553,GO:0004556,GO:0005575,GO:0005618,GO:0005622,GO:0005623,GO:0005737,GO:0005783,GO:0005886,GO:0005975,GO:0005976,GO:0008150,GO:0008152,GO:0008360,GO:0009056,GO:0009057,GO:0009272,GO:0009897,GO:0009986,GO:0009987,GO:0016020,GO:0016052,GO:0016160,GO:0016787,GO:0016798,GO:0022603,GO:0022604,GO:0030312,GO:0042546,GO:0043170,GO:0043226,GO:0043227,GO:0043229,GO:…	K01176		fuNOG[21]	03M0P@ascNOG,0MDMV@euroNOG,0MQT5@eurotNOG,0PGMM@fuNOG,12QDU@opiNOG,COG0366@NOG,KOG0471@euNOG	NA|NA|NA	G	alpha-amylase
cF05247	5061.CADANGAP00008395	7.1e-195	685.6			K01188		fuNOG[21]	0428Z@ascNOG,0PFTX@fuNOG,12NH9@opiNOG,COG2723@NOG,KOG0626@euNOG	NA|NA|NA	G	Glycosyl hydrolase family 1
cF05365	861557.XP_003301009.1	4e-34	150.2					fuNOG[21]	03TWZ@ascNOG,0H7MS@dotNOG,0J24E@euNOG,0PR26@fuNOG,121FN@NOG,13VPF@opiNOG,15EPV@pleNOG	NA|NA|NA
cF05366	426418.XP_001934618.1	8.8e-105	386	FG01621.1	GO:0000272,GO:0003674,GO:0003824,GO:0004553,GO:0005575,GO:0005576,GO:0005623,GO:0005886,GO:0005975,GO:0005976,GO:0008150,GO:0008152,GO:0008810,GO:0009056,GO:0009057,GO:0009251,GO:0016020,GO:0016052,GO:0016787,GO:0016798,GO:0043170,GO:0044042,GO:0044238,GO:0044464,GO:0071704,GO:0071944,GO:1901575	K01179		fuNOG[21]	03N0I@ascNOG,0H6HC@dotNOG,0IE6V@euNOG,0PGYW@fuNOG,12T34@opiNOG,15AK8@pleNOG,COG2730@NOG	NA|NA|NA	G	Cellulase (glycosyl hydrolase family 5)
cF05412	426418.XP_001935310.1	3.5e-166	590.1		GO:0005575,GO:0005576			fuNOG[21]	03NCT@ascNOG,0HAHX@dotNOG,0IE0Q@euNOG,0PKAX@fuNOG,132JM@opiNOG,15DII@pleNOG,COG2234@NOG	NA|NA|NA	E	zinc metalloprotease
cF05418	1047171.EFQ32096	1.1e-112	411.8	FG04980.1	GO:0000323,GO:0000737,GO:0001558,GO:0002084,GO:0003674,GO:0003824,GO:0005575,GO:0005576,GO:0005622,GO:0005623,GO:0005634,GO:0005737,GO:0005764,GO:0005773,GO:0005783,GO:0005789,GO:0005794,GO:0005829,GO:0006139,GO:0006259,GO:0006308,GO:0006309,GO:0006464,GO:0006629,GO:0006643,GO:0006665,GO:0006725,GO:0006807,GO:0006810,GO:0006873,GO:0006885,GO:0006897,GO:0006898,GO:0006907,GO:0006915,GO:0006921,GO:…	K01074		fuNOG[21]	03QCD@ascNOG,0H6WK@dotNOG,0PMHB@fuNOG,12TE3@opiNOG,COG1075@NOG,KOG2541@euNOG	NA|NA|NA	I, O	Palmitoyl protein thioesterase
cF05443	51453.JGI108686	1.2e-91	342.8					fuNOG[21]	03R58@ascNOG,0IWAZ@euNOG,0PNMV@fuNOG,0SGQ7@hypNOG,0Y9NG@NOG,13QN3@opiNOG,19RWV@sordNOG	NA|NA|NA	S	Eukaryotic aspartyl protease
cF05456	500485.XP_002568352.1	3.3e-48	197.6					fuNOG[21]	03TU1@ascNOG,0J09H@euNOG,0M9CY@euroNOG,0MRKR@eurotNOG,0PQZ2@fuNOG,11XAE@NOG,13UMD@opiNOG	NA|NA|NA
cF05459	40559.EDN20504	1.3e-182	644.8			K19069		fuNOG[21]	03X3S@ascNOG,0J9C9@euNOG,0PVIU@fuNOG,0YBZI@NOG,140F2@opiNOG	NA|NA|NA	O	GMC oxidoreductase
cF05485	861557.XP_003304991.1	3.2e-141	506.9			K01480		fuNOG[21]	03J00@ascNOG,0H93K@dotNOG,0PI69@fuNOG,12RTM@opiNOG,15DNG@pleNOG,COG0010@NOG,KOG2964@euNOG	NA|NA|NA	E	Arginase family
cF05539	306901.XP_001220373.1	2.7e-83	314.3	FG03801.1		K00505		fuNOG[21]	03R5S@ascNOG,0IWAG@euNOG,0PN51@fuNOG,11GD1@NOG,13QKY@opiNOG,19W3P@sordNOG,1A8RA@sorNOG	NA|NA|NA	G	Common central domain of tyrosinase
cF05582	36630.CADNFIAP00000274	7.2e-80	302.4					fuNOG[21]	03SCQ@ascNOG,0IXR8@euNOG,0MBPK@euroNOG,0MQSQ@eurotNOG,0PPDK@fuNOG,0YBI6@NOG,13RGH@opiNOG	NA|NA|NA
cF05600	36630.CADNFIAP00003916	1.4e-16	92.4	FG03123.1	GO:0005575,GO:0005576			fuNOG[21]	03UGS@ascNOG,0J0YN@euNOG,0M94R@euroNOG,0MPE8@eurotNOG,0PRFZ@fuNOG,0YS83@NOG,13VEW@opiNOG	NA|NA|NA	S	antigenic cell wall galactomannoprotein
cF05610	426418.XP_001938817.1	2.1e-113	414.5					fuNOG[21]	03PYJ@ascNOG,0H9UQ@dotNOG,0IKU5@euNOG,0PMEJ@fuNOG,12PX3@opiNOG,15AYK@pleNOG,COG3386@NOG	NA|NA|NA	G	Major royal jelly protein
cF05620	426418.XP_001937817.1	3.1e-56	223.8					fuNOG[21]	03SI6@ascNOG,0H78S@dotNOG,0IXKB@euNOG,0PNR3@fuNOG,11MY3@NOG,13RDU@opiNOG,15BA9@pleNOG	NA|NA|NA	G	Glycosyl hydrolase family 61
cF05622	559298.XP_002622156.1	0	1110.9	AGDC	GO:0000272,GO:0003674,GO:0003824,GO:0004553,GO:0004558,GO:0005575,GO:0005576,GO:0005975,GO:0005976,GO:0005982,GO:0006073,GO:0008150,GO:0008152,GO:0008422,GO:0009056,GO:0009057,GO:0009251,GO:0009987,GO:0015926,GO:0016052,GO:0016787,GO:0016798,GO:0043170,GO:0044042,GO:0044237,GO:0044238,GO:0044260,GO:0044262,GO:0044264,GO:0044275,GO:0044723,GO:0044724,GO:0071704,GO:1901575	K01187		fuNOG[21]	03JH1@ascNOG,0M5X1@euroNOG,0PHCX@fuNOG,12ECE@onyNOG,12Q2U@opiNOG,COG1501@NOG,KOG1065@euNOG	NA|NA|NA	G	Alpha-glucosidase
cF05624	861557.XP_003304290.1	1.9e-63	248.4					fuNOG[21]	03URP@ascNOG,0HAB0@dotNOG,0J4NQ@euNOG,0PT3X@fuNOG,0YQGW@NOG,13W5I@opiNOG,15BXN@pleNOG	NA|NA|NA
cF05639	5062.CADAORAP00010011	1.2e-119	435.3	FG10411.1	GO:0000272,GO:0003674,GO:0003824,GO:0004553,GO:0005575,GO:0005576,GO:0005615,GO:0005975,GO:0005976,GO:0008150,GO:0008152,GO:0009056,GO:0009057,GO:0009251,GO:0016052,GO:0016162,GO:0016787,GO:0016798,GO:0043170,GO:0044042,GO:0044238,GO:0044421,GO:0071704,GO:1901575	K01181		fuNOG[21]	03PE8@ascNOG,0IERE@euNOG,0PKIH@fuNOG,13HD6@opiNOG,COG3693@NOG	NA|NA|NA	G	Endo-1,4-beta-xylanase
cF05651	861557.XP_003306156.1	3.2e-201	707.2	FG05163.1				fuNOG[21]	03QF4@ascNOG,0H3IS@dotNOG,0IE4R@euNOG,0PFTA@fuNOG,0XNS8@NOG,12NGM@opiNOG,159JH@pleNOG	NA|NA|NA	S	Heterokaryon incompatibility protein Het-C
cF05682	13684.SNOT_11318	1.1e-154	552	FAEB-2	GO:0005575,GO:0005576	K09252		fuNOG[21]	03I8P@ascNOG,0H3Y2@dotNOG,0IDXJ@euNOG,0PF9F@fuNOG,0XQEN@NOG,12N2E@opiNOG,15AY0@pleNOG	NA|NA|NA	G	Tannase and feruloyl esterase
cF05700	5022.CBX94420	5.9e-130	469.9	PGUG_02308	GO:0003674,GO:0003824,GO:0004497,GO:0005488,GO:0005506,GO:0008150,GO:0008152,GO:0016491,GO:0020037,GO:0043167,GO:0043169,GO:0044710,GO:0046872,GO:0046906,GO:0046914,GO:0055114,GO:0097159,GO:1901363	K00493		fuNOG[21]	03JBZ@ascNOG,0H5II@dotNOG,0PIJR@fuNOG,12NU8@opiNOG,157D8@pleNOG,COG2124@NOG,KOG0158@euNOG	NA|NA|NA	Q	Cytochrome P450
cF05709	40559.EDN18783	2.6e-97	360.9	FG00173.1				fuNOG[21]	03PAC@ascNOG,0IHNQ@euNOG,0PJVM@fuNOG,12PP1@opiNOG,COG2273@NOG	NA|NA|NA	G	Cell wall glucanase
cF05719	5059.CADAFLAP00000464	3.6e-160	570.5					fuNOG[21]	03PI5@ascNOG,0PJ6X@fuNOG,12SF8@opiNOG,COG2303@NOG,KOG1238@euNOG	NA|NA|NA	E	glucose oxidase
cF05723	5022.CBX97353	1.1e-175	621.7	FG05679.1	GO:0007275,GO:0008150,GO:0032501,GO:0032502,GO:0043581,GO:0044699,GO:0044707,GO:0044767,GO:0048856			fuNOG[21]	03JS0@ascNOG,0H46R@dotNOG,0IGM7@euNOG,0PGUC@fuNOG,0Z3WK@NOG,13HTS@opiNOG,15CT4@pleNOG	NA|NA|NA	S	Protein of unknown function (DUF3445)
cF05753	578455.XP_003650453.1	7.9e-154	549.3	MNS1B	GO:0005575,GO:0005576,GO:0005622,GO:0005623,GO:0005737,GO:0016023,GO:0031410,GO:0031974,GO:0031982,GO:0031983,GO:0031988,GO:0043226,GO:0043227,GO:0043229,GO:0043231,GO:0043233,GO:0044422,GO:0044424,GO:0044433,GO:0044444,GO:0044446,GO:0044464,GO:0060205	K01230		fuNOG[21]	03N19@ascNOG,0CQS7@chaNOG,0PM8H@fuNOG,0XP04@NOG,13K36@opiNOG,19MG0@sordNOG,1A8ZK@sorNOG,KOG2204@euNOG	NA|NA|NA	G	Glycoside hydrolase family 47 protein
cF05782	426418.XP_001930622.1	8.4e-209	731.9		GO:0000003,GO:0000746,GO:0000747,GO:0003674,GO:0003824,GO:0004180,GO:0004185,GO:0005575,GO:0005576,GO:0005622,GO:0005623,GO:0005634,GO:0005737,GO:0005829,GO:0006508,GO:0008150,GO:0008152,GO:0008233,GO:0008236,GO:0008238,GO:0008277,GO:0009056,GO:0009057,GO:0009966,GO:0009968,GO:0009987,GO:0010515,GO:0010646,GO:0010648,GO:0010969,GO:0016787,GO:0017171,GO:0019538,GO:0019953,GO:0023051,GO:0023057,GO:…	K01288		fuNOG[21]	03N4J@ascNOG,0HB84@dotNOG,0PG21@fuNOG,12SE5@opiNOG,15E4M@pleNOG,COG2939@NOG,KOG1282@euNOG	NA|NA|NA	E, O	Serine carboxypeptidase
cF05783	5022.CBY00548	1.4e-190	671.4	SED4	GO:0003674,GO:0003824,GO:0004177,GO:0005575,GO:0005576,GO:0005615,GO:0005618,GO:0005623,GO:0006508,GO:0008150,GO:0008152,GO:0008233,GO:0008238,GO:0009277,GO:0016787,GO:0019538,GO:0030312,GO:0030428,GO:0034701,GO:0043170,GO:0044238,GO:0044421,GO:0044464,GO:0045148,GO:0070011,GO:0071704,GO:0071944	K01279		fuNOG[21]	03Q1Z@ascNOG,0H6GJ@dotNOG,0IICY@euNOG,0PI5I@fuNOG,13I7B@opiNOG,158PS@pleNOG,COG4934@NOG	NA|NA|NA	O	Pro-kumamolisin, activation domain
cF05808	5061.CADANGAP00012900	6.4e-111	406	FG01621.1	GO:0000272,GO:0003674,GO:0003824,GO:0004553,GO:0005575,GO:0005576,GO:0005623,GO:0005886,GO:0005975,GO:0005976,GO:0008150,GO:0008152,GO:0008810,GO:0009056,GO:0009057,GO:0009251,GO:0016020,GO:0016052,GO:0016787,GO:0016798,GO:0043170,GO:0044042,GO:0044238,GO:0044464,GO:0071704,GO:0071944,GO:1901575	K01179		fuNOG[21]	03N0I@ascNOG,0IE6V@euNOG,0MCZI@euroNOG,0MHRS@eurotNOG,0PGYW@fuNOG,12T34@opiNOG,COG2730@NOG	NA|NA|NA	G	Has endoglucanase activity on substrates containing beta-1,4 glycosidic bonds, like in carboxymethylcellulose (CMC), hydroxyethylcellulose (HEC) and beta-glucan. Involved in the degradation of complex natural cellulosic substrates
cF05852	861557.XP_003305804.1	2.1e-13	81.6					fuNOG[21]	040AW@ascNOG,0H92D@dotNOG,0J5JQ@euNOG,0PY03@fuNOG,0YSAT@NOG,146CV@opiNOG,15EK1@pleNOG	NA|NA|NA	S	ZnF_C2H2
cF05884	40559.EDN31423	2.5e-48	198.4					fuNOG[21]	03URP@ascNOG,0J4NQ@euNOG,0PT3X@fuNOG,0YQGW@NOG,13W5I@opiNOG	NA|NA|NA
cF05894	13684.SNOT_03038	1.3e-84	318.9					fuNOG[21]	03MW6@ascNOG,0HB6S@dotNOG,0IEIG@euNOG,0PHVY@fuNOG,0YBX6@NOG,13NPY@opiNOG,157WV@pleNOG	NA|NA|NA	S	Protein of unknown function (DUF3431)
cF05917	148304.MAPG_06194T0	2.7e-185	653.7	FG08423.1		K09704		fuNOG[21]	03N41@ascNOG,0IEBK@euNOG,0PMP7@fuNOG,0U7RD@magNOG,13KPT@opiNOG,19P3W@sordNOG,COG3538@NOG	NA|NA|NA	S	DUF1237
cF05953	1047171.EFQ32572	1.3e-142	511.9					fuNOG[21]	03MUN@ascNOG,0H6C6@dotNOG,0IHDX@euNOG,0PJX2@fuNOG,13N3P@opiNOG,COG0277@NOG	NA|NA|NA	C	FAD binding domain
cF05981	13684.SNOT_07261	6.1e-123	446.4					fuNOG[21]	03MNY@ascNOG,0H45S@dotNOG,0IKZ9@euNOG,0PKT2@fuNOG,13JTR@opiNOG,15879@pleNOG,COG0277@NOG	NA|NA|NA	C	Berberine and berberine like
cF06029	5022.CBX96540	1.8e-71	274.6	FG07412.1				fuNOG[21]	03R07@ascNOG,0H7FD@dotNOG,0IVX8@euNOG,0PN1B@fuNOG,1286Q@NOG,13QFN@opiNOG,1597Q@pleNOG	NA|NA|NA
cF06071	861557.XP_003300362.1	6.3e-128	462.6	FG01240.1				fuNOG[21]	03PTU@ascNOG,0H658@dotNOG,0PK4T@fuNOG,12TD6@opiNOG,159YZ@pleNOG,COG3675@NOG,KOG4569@euNOG	NA|NA|NA	I	Lipase (class 3)
cF06085	426418.XP_001938287.1	1.6e-283	980.7	KEX2	GO:0000003,GO:0000139,GO:0000746,GO:0000747,GO:0003674,GO:0003824,GO:0004175,GO:0004252,GO:0004857,GO:0004866,GO:0004867,GO:0005575,GO:0005576,GO:0005615,GO:0005622,GO:0005623,GO:0005737,GO:0005768,GO:0005769,GO:0005783,GO:0005788,GO:0005794,GO:0005798,GO:0005802,GO:0005886,GO:0006508,GO:0006950,GO:0006970,GO:0007323,GO:0008150,GO:0008152,GO:0008233,GO:0008236,GO:0009628,GO:0009966,GO:0009986,GO:…	K01341		fuNOG[21]	03I7W@ascNOG,0H362@dotNOG,0PF8E@fuNOG,12PQZ@opiNOG,159KB@pleNOG,COG1404@NOG,COG4935@NOG,KOG3525@euNOG	NA|NA|NA	O	Proprotein convertase P-domain
cF06098	29760.VIT_03s0063g00010.t01	1.3e-78	298.9		GO:0005575,GO:0005622,GO:0005623,GO:0005737,GO:0009507,GO:0009536,GO:0043226,GO:0043227,GO:0043229,GO:0043231,GO:0044424,GO:0044444,GO:0044464			virNOG[6]	0IKEU@euNOG,1BGGS@strNOG,1DUE8@virNOG,COG4886@NOG	NA|NA|NA	S	Leucine-rich repeat family protein
cF06113	573729.XP_003666291.1	1.1e-14	86.3					fuNOG[21]	03T5J@ascNOG,0CX0W@chaNOG,0J02F@euNOG,0PPZ0@fuNOG,128ED@NOG,13TRW@opiNOG,19S07@sordNOG,1AFFS@sorNOG	NA|NA|NA
cF06117	40559.EDN19880	1e-90	339					fuNOG[21]	03P6X@ascNOG,0IIRU@euNOG,0PK1Z@fuNOG,11FI3@NOG,13ABB@opiNOG	NA|NA|NA	G	Glycosyl hydrolases family 16
cF06119	861557.XP_003295813.1	3.2e-45	187.6			K01336		fuNOG[21]	03YN0@ascNOG,0HB6M@dotNOG,0PVRE@fuNOG,140XB@opiNOG,158AG@pleNOG,COG1404@NOG,KOG1153@euNOG	NA|NA|NA	O	Subtilase family
cF06126	36630.CADNFIAP00007810	1.7e-262	910.6			K01205		fuNOG[21]	03MDY@ascNOG,0M4P1@euroNOG,0MMBG@eurotNOG,0PIFY@fuNOG,0XNMK@NOG,12TZY@opiNOG,KOG2233@euNOG	NA|NA|NA	U	Alpha-N-acetylglucosaminidase (NAGLU) tim-barrel domain
cF06149	5180.EDO01132	1.8e-96	357.8	BGL2	GO:0000272,GO:0003674,GO:0003824,GO:0004338,GO:0004553,GO:0005575,GO:0005618,GO:0005623,GO:0005975,GO:0005976,GO:0006073,GO:0008150,GO:0008152,GO:0008422,GO:0009056,GO:0009057,GO:0009251,GO:0009272,GO:0009277,GO:0009987,GO:0010383,GO:0015926,GO:0016043,GO:0016052,GO:0016740,GO:0016787,GO:0016798,GO:0030312,GO:0031505,GO:0034406,GO:0042123,GO:0042124,GO:0042546,GO:0042973,GO:0043170,GO:0044036,GO:…	K01210	13BGH	fuNOG[21]	03P4R@ascNOG,0IJD5@euNOG,0PK2A@fuNOG,13HHX@opiNOG,COG5309@NOG	NA|NA|NA	G	Glucan 1,3-beta-glucosidase
cF06176	861557.XP_003297459.1	1.2e-89	335.9	CTSD	GO:0005575,GO:0005623,GO:0005886,GO:0016020,GO:0044464,GO:0071944			fuNOG[21]	03QZT@ascNOG,0H70U@dotNOG,0PN8W@fuNOG,0XNV7@NOG,13Q32@opiNOG,15DM1@pleNOG,KOG1339@euNOG	NA|NA|NA	O	Eukaryotic aspartyl protease
cF06197	426418.XP_001934171.1	6.9e-231	805.4	KEX1	GO:0000322,GO:0000323,GO:0000324,GO:0003674,GO:0003824,GO:0004180,GO:0004185,GO:0005575,GO:0005622,GO:0005623,GO:0005737,GO:0005773,GO:0005774,GO:0005802,GO:0006915,GO:0008150,GO:0008152,GO:0008219,GO:0008233,GO:0008236,GO:0008238,GO:0009056,GO:0009057,GO:0009987,GO:0012501,GO:0016020,GO:0016265,GO:0016787,GO:0017171,GO:0019538,GO:0030163,GO:0031090,GO:0032588,GO:0043170,GO:0043226,GO:0043227,GO:…	K01288		fuNOG[21]	03M8Q@ascNOG,0H4IM@dotNOG,0PGB2@fuNOG,12NYT@opiNOG,15AZX@pleNOG,COG2939@NOG,KOG1282@euNOG	NA|NA|NA	O	Protease with a carboxypeptidase B-like function involved in the C-terminal processing of the lysine and arginine residues from protein precursors. Promotes cell fusion and is involved in the programmed cell death (By similarity)
cF06201	5057.CADACLAP00004365	3.3e-70	270.4	ERP1	GO:0000139,GO:0005575,GO:0005622,GO:0005623,GO:0005737,GO:0005739,GO:0005783,GO:0005789,GO:0005794,GO:0006810,GO:0006888,GO:0008150,GO:0009987,GO:0012505,GO:0016020,GO:0016021,GO:0016023,GO:0016192,GO:0016482,GO:0030133,GO:0030134,GO:0030135,GO:0031090,GO:0031224,GO:0031410,GO:0031982,GO:0031988,GO:0042175,GO:0043226,GO:0043227,GO:0043229,GO:0043231,GO:0044422,GO:0044424,GO:0044425,GO:0044431,GO:…			fuNOG[21]	03PTP@ascNOG,0M5HU@euroNOG,0PKS7@fuNOG,0XPUW@NOG,12QCY@opiNOG,KOG1690@euNOG	NA|NA|NA	U	endosomal cargo receptor
cF06215	535722.XP_003171118.1	7.8e-261	905.2	PGUG_04783				fuNOG[21]	02XE5@arthNOG,03KT9@ascNOG,0IGPT@euNOG,0M41U@euroNOG,0PI20@fuNOG,12JNZ@onyNOG,12PMB@opiNOG,COG3537@NOG	NA|NA|NA	G	Glycosyl hydrolase family 92
cF06243	13684.SNOT_12460	8.1e-126	456.1		GO:0003674,GO:0003824,GO:0004180,GO:0004185,GO:0005575,GO:0005576,GO:0008150,GO:0008152,GO:0008233,GO:0008236,GO:0008238,GO:0016787,GO:0017171,GO:0070008,GO:0070011	K01288		fuNOG[21]	03M66@ascNOG,0H9JE@dotNOG,0PKAW@fuNOG,13K6X@opiNOG,15DQQ@pleNOG,COG2939@NOG,KOG1282@euNOG	NA|NA|NA	E, O	Serine carboxypeptidase
cF06246	5061.CADANGAP00008004	4.5e-41	172.6	LCL2				NOG[107]	127SF@NOG	NA|NA|NA	U	component of the endoplasmic reticulum- associated degradation (ERAD) pathway (By similarity)
cF06251	40559.EDN27877	5.2e-56	223.4			K11244		fuNOG[21]	03UCD@ascNOG,0J02Z@euNOG,0PRJ5@fuNOG,11WHY@NOG,13UWM@opiNOG	NA|NA|NA	S	WSC domain
cF06281	426418.XP_001932743.1	2.4e-238	830.1			K01288		fuNOG[21]	03XIW@ascNOG,0HAHG@dotNOG,0PI2P@fuNOG,13J5U@opiNOG,15E81@pleNOG,COG2939@NOG,KOG1282@euNOG	NA|NA|NA	E, O	Serine carboxypeptidase
cF06283	426418.XP_001936940.1	2.2e-62	244.6					fuNOG[21]	03NIW@ascNOG,0H3YW@dotNOG,0IKIJ@euNOG,0PKKC@fuNOG,0Y7W2@NOG,13PH7@opiNOG,15BPZ@pleNOG	NA|NA|NA
cF06342	578458.XP_003027783.1	3.1e-51	206.8					fuNOG[21]	0J96A@euNOG,0PX5Y@fuNOG,0XRGD@NOG,145TE@opiNOG	NA|NA|NA
cF06357	29875.EHK24037	0	1091.3					fuNOG[21]	0JAR9@euNOG,0PWH8@fuNOG,141ZY@opiNOG,COG1472@NOG	NA|NA|NA	G	Glycoside hydrolase family 3
cF06399	36630.CADNFIAP00009073	8.7e-158	562			K18195		fuNOG[21]	03M6P@ascNOG,0IIVD@euNOG,0ME7Y@euroNOG,0MTVZ@eurotNOG,0PK7B@fuNOG,0YE12@NOG,13JIZ@opiNOG	NA|NA|NA	S	Inherit from euNOG: Rhamnogalacturonate lyase
cF06421	208348.PTTG_00528P0	4.6e-12	76.6	FG02685.1				fuNOG[21]	0IZ74@euNOG,0PQ78@fuNOG,11PAQ@NOG,13SH2@opiNOG	NA|NA|NA
cF06499	246410.XP_001243592.1	1.2e-41	176					fuNOG[21]	03ZEX@ascNOG,0JCRW@euNOG,0MG26@euroNOG,0PX2X@fuNOG,0YJWT@NOG,12GFW@onyNOG,145FG@opiNOG	NA|NA|NA
cF06535	162425.CADANIAP00006682	8.4e-90	336.3	FG07250.1	GO:0000322,GO:0000323,GO:0000324,GO:0000329,GO:0005575,GO:0005622,GO:0005623,GO:0005737,GO:0005773,GO:0005774,GO:0005783,GO:0005794,GO:0006810,GO:0006888,GO:0008150,GO:0009987,GO:0016020,GO:0016192,GO:0016482,GO:0031090,GO:0043226,GO:0043227,GO:0043229,GO:0043231,GO:0044422,GO:0044424,GO:0044437,GO:0044444,GO:0044446,GO:0044464,GO:0044699,GO:0044763,GO:0044765,GO:0046907,GO:0048193,GO:0051179,GO:…	K10082		fuNOG[21]	03JH2@ascNOG,0M537@euroNOG,0MHPN@eurotNOG,0PHCK@fuNOG,0YH8V@NOG,12UBE@opiNOG,KOG3839@euNOG	NA|NA|NA	U	Lectin family integral membrane protein
cF06613	441959.XP_002484291.1	1e-146	525.4					fuNOG[21]	03QCY@ascNOG,0IIKE@euNOG,0MB9F@euroNOG,0MJM6@eurotNOG,0PKK0@fuNOG,0XS3S@NOG,131Q6@opiNOG	NA|NA|NA	G	glycosyl hydrolase family 43 protein
cF06629	162425.CADANIAP00002320	2.4e-16	92.8	FG09703.1				fuNOG[21]	03SXN@ascNOG,0IZWM@euNOG,0M9U6@euroNOG,0MP7E@eurotNOG,0PQ8H@fuNOG,12CSU@NOG,13U3C@opiNOG	NA|NA|NA	S	integral membrane protein
cF06648	861557.XP_003305713.1	3.2e-30	136.3					fuNOG[21]	03SV9@ascNOG,0H7YY@dotNOG,0PQG8@fuNOG,13SUQ@opiNOG,15CG1@pleNOG,COG0537@NOG,KOG3275@euNOG	NA|NA|NA	T	Inherit from dotNOG: HIT domain
cF06675	1047171.EFQ34446	1.4e-206	724.5	FG09141.1	GO:0000322,GO:0000323,GO:0000324,GO:0003674,GO:0003824,GO:0003840,GO:0005575,GO:0005576,GO:0005622,GO:0005623,GO:0005737,GO:0005773,GO:0005774,GO:0005783,GO:0005789,GO:0006082,GO:0006518,GO:0006520,GO:0006575,GO:0006749,GO:0006751,GO:0006790,GO:0006805,GO:0006807,GO:0006950,GO:0006979,GO:0006995,GO:0007154,GO:0008150,GO:0008152,GO:0009056,GO:0009063,GO:0009267,GO:0009410,GO:0009605,GO:0009987,GO:…	K00681,K18592	GTMLT	fuNOG[21]	03IEE@ascNOG,0H5V2@dotNOG,0PGQX@fuNOG,12RPB@opiNOG,COG0405@NOG,KOG2410@euNOG	NA|NA|NA	E	Gamma-glutamyltranspeptidase
cF06705	441959.XP_002481098.1	9.9e-64	248.8	FG10922.1	GO:0005575,GO:0005618,GO:0005623,GO:0030312,GO:0031160,GO:0044464,GO:0071944			fuNOG[21]	03RA9@ascNOG,0IWZW@euNOG,0MD62@euroNOG,0MMNR@eurotNOG,0PN6V@fuNOG,13Q5T@opiNOG,COG4305@NOG	NA|NA|NA	G	cellulase
cF06707	13684.SNOT_09570	2.8e-199	700.3	NAG2	GO:0007275,GO:0008150,GO:0032501,GO:0032502,GO:0043581,GO:0044699,GO:0044707,GO:0044767,GO:0048856	K12373		fuNOG[21]	03PNF@ascNOG,0H6T9@dotNOG,0PIDG@fuNOG,12QRR@opiNOG,158HR@pleNOG,COG3525@NOG,KOG2499@euNOG	NA|NA|NA	G	beta-hexosaminidase
cF06736	13684.SNOT_11497	2.2e-30	140.2	FG04573.1				fuNOG[21]	03S7K@ascNOG,0H68S@dotNOG,0IXSV@euNOG,0PP8E@fuNOG,0ZI62@NOG,13RM9@opiNOG,15DXR@pleNOG	NA|NA|NA	T	Inherit from euNOG: Notch ligand involved in the mediation of Notch signaling (By similarity)
cF06780	40559.EDN33531	2.8e-65	254.2			K01199,K01210		fuNOG[21]	03P4R@ascNOG,0IJD5@euNOG,0PK2A@fuNOG,13HHX@opiNOG,COG5309@NOG	NA|NA|NA	G	Glucan 1,3-beta-glucosidase
cF06798	5062.CADAORAP00003547	5.3e-100	370.2	EGLC	GO:0005575,GO:0005618,GO:0005623,GO:0005886,GO:0016020,GO:0030312,GO:0044464,GO:0071944	K01199		fuNOG[21]	03IZG@ascNOG,0IJII@euNOG,0MEPS@euroNOG,0MIQH@eurotNOG,0PM6H@fuNOG,13M3U@opiNOG,COG5309@NOG	NA|NA|NA	G	Glucanases play a role in cell expansion during growth, in cell-cell fusion during mating, and in spore release during sporulation. This enzyme may be involved in beta-glucan degradation and also function biosynthetically as a transglycosylase
cF06831	33178.CADATEAP00004902	2.4e-187	660.6			K01130		fuNOG[21]	03IJ0@ascNOG,0M7N1@euroNOG,0PMGT@fuNOG,12QWY@opiNOG,COG3119@NOG,KOG3731@euNOG	NA|NA|NA	G	Sulfatase
cF06832	5022.CBX92557	2.2e-60	237.7	FG02386.1				fuNOG[21]	03QR4@ascNOG,0H42X@dotNOG,0IIU8@euNOG,0PKEE@fuNOG,112PD@NOG,13JTF@opiNOG,15D03@pleNOG	NA|NA|NA	G	Pectate lyase
cF06859	40559.EDN26635	2.5e-299	1033.1	BGLG	GO:0005575,GO:0005576	K05349		fuNOG[21]	03KBT@ascNOG,0IF0P@euNOG,0PHDM@fuNOG,13F94@opiNOG,COG1472@NOG	NA|NA|NA	G	Beta-glucosidases are one of a number of cellulolytic enzymes involved in the degradation of cellulosic biomass. Catalyzes the last step releasing glucose from the inhibitory cellobiose (By similarity)
cF06917	559298.XP_002628815.1	1.5e-86	325.5					fuNOG[21]	03PAE@ascNOG,0M7SQ@euroNOG,0PMW2@fuNOG,0XT5U@NOG,12GZR@onyNOG,13Q3P@opiNOG,KOG2458@euNOG	NA|NA|NA	S	DUF821 domain-containing protein
cF06924	500485.XP_002568421.1	2.5e-132	477.2	MANA	GO:0000272,GO:0003674,GO:0003824,GO:0004553,GO:0004567,GO:0005575,GO:0005576,GO:0005975,GO:0005976,GO:0008150,GO:0008152,GO:0009056,GO:0009057,GO:0009987,GO:0010412,GO:0015923,GO:0016052,GO:0016787,GO:0016798,GO:0016985,GO:0016998,GO:0043170,GO:0044036,GO:0044237,GO:0044238,GO:0044247,GO:0044248,GO:0044260,GO:0044262,GO:0044264,GO:0044275,GO:0044699,GO:0044723,GO:0044724,GO:0044763,GO:0046355,GO:…	K19355		fuNOG[21]	03NDK@ascNOG,0IIG3@euNOG,0MA91@euroNOG,0MMXE@eurotNOG,0PKKN@fuNOG,12P7K@opiNOG,COG3934@NOG	NA|NA|NA	G	Endo-1,4-mannanase, a crucial enzyme for depolymerization of seed galactomannans and wood galactoglucomannans
cF06925	861557.XP_003306650.1	3.7e-73	280.4			K19356		fuNOG[21]	04002@ascNOG,0HBI6@dotNOG,0JE35@euNOG,0PXUN@fuNOG,118YW@NOG,146D5@opiNOG,15AAQ@pleNOG	NA|NA|NA	G	Glycosyl hydrolase family 61
cF06933	5022.CBX95666	2.9e-116	423.7			K01166		fuNOG[21]	03PQ1@ascNOG,0H6QN@dotNOG,0PHG5@fuNOG,11M7G@NOG,13KET@opiNOG,159I1@pleNOG,KOG1642@euNOG	NA|NA|NA	A	Ribonuclease T2 family
cF06957	578455.XP_003655234.1	1.1e-42	179.5	SET5	GO:0000228,GO:0000785,GO:0000790,GO:0003674,GO:0003824,GO:0005575,GO:0005622,GO:0005623,GO:0005634,GO:0005694,GO:0005737,GO:0006325,GO:0006464,GO:0006479,GO:0006996,GO:0008150,GO:0008152,GO:0008168,GO:0008213,GO:0008757,GO:0009987,GO:0016043,GO:0016568,GO:0016569,GO:0016570,GO:0016571,GO:0016740,GO:0016741,GO:0019538,GO:0031974,GO:0031981,GO:0032259,GO:0034968,GO:0036211,GO:0043170,GO:0043226,GO:…	K07117,K11426		fuNOG[21]	03JW4@ascNOG,0CVW5@chaNOG,0PGYB@fuNOG,12PHP@opiNOG,19UT7@sordNOG,1A8MF@sorNOG,COG2940@NOG,KOG2084@euNOG	NA|NA|NA	B	SET
cF06980	578455.XP_003656915.1	2e-98	364.4	FG00769.1				fuNOG[21]	03PYE@ascNOG,0CR2K@chaNOG,0IJ2P@euNOG,0PKXT@fuNOG,11NAT@NOG,13PEE@opiNOG,19MNC@sordNOG,1AB9Z@sorNOG	NA|NA|NA	S	Inherit from ascNOG: Conserved hypothetical protein
cF06987	1047171.EFQ35706	1.3e-126	458.4			K01224		fuNOG[21]	03YK8@ascNOG,0IFS4@euNOG,0PV72@fuNOG,1431M@opiNOG,COG3867@NOG	NA|NA|NA	G	Glycosyl hydrolase family 53
cF07001	36630.CADNFIAP00001491	2.1e-56	224.6	RNY1	GO:0000902,GO:0003674,GO:0003824,GO:0004518,GO:0004519,GO:0004521,GO:0004540,GO:0005575,GO:0005576,GO:0005622,GO:0005623,GO:0005737,GO:0005773,GO:0005775,GO:0005829,GO:0006139,GO:0006401,GO:0006725,GO:0006807,GO:0006915,GO:0008150,GO:0008152,GO:0008219,GO:0009056,GO:0009057,GO:0009653,GO:0009987,GO:0012501,GO:0016043,GO:0016070,GO:0016265,GO:0016787,GO:0016788,GO:0019439,GO:0031974,GO:0032502,GO:…	K01166		fuNOG[21]	03KWB@ascNOG,0MB7C@euroNOG,0MPV7@eurotNOG,0PHXQ@fuNOG,11M7G@NOG,12U1M@opiNOG,KOG1642@euNOG	NA|NA|NA	A	ribonuclease T2
cF07023	426418.XP_001931072.1	0	1190.3	LACA	GO:0003674,GO:0003824,GO:0004553,GO:0004565,GO:0005575,GO:0005576,GO:0005975,GO:0008150,GO:0008152,GO:0015925,GO:0016787,GO:0016798,GO:0044238,GO:0071704			fuNOG[21]	03M3P@ascNOG,0H69V@dotNOG,0PGTY@fuNOG,12QYB@opiNOG,159FZ@pleNOG,COG1874@NOG,KOG0496@euNOG	NA|NA|NA	G	beta-galactosidase
cF07030	861557.XP_003305707.1	1.7e-53	215.7	FG01557.1				fuNOG[21]	03QXK@ascNOG,0H7Q9@dotNOG,0IW4Z@euNOG,0PMWW@fuNOG,0Y9PP@NOG,13Q1D@opiNOG,15E3U@pleNOG	NA|NA|NA	S	Pfam:Acid_phosphat_A
cF07033	426418.XP_001935600.1	3e-70	271.6	FG05935.1		K01050,K03927		fuNOG[21]	03J1S@ascNOG,0H4H7@dotNOG,0PG3X@fuNOG,12TED@opiNOG,15BXM@pleNOG,COG2272@NOG,KOG4389@euNOG	NA|NA|NA	T	Carboxylesterase family
cF07049	40559.EDN18198	4.8e-132	476.5	EXG1	GO:0000003,GO:0000935,GO:0003006,GO:0003674,GO:0003824,GO:0004338,GO:0004553,GO:0005575,GO:0005576,GO:0005618,GO:0005619,GO:0005623,GO:0005975,GO:0005976,GO:0006073,GO:0007049,GO:0008150,GO:0008152,GO:0008422,GO:0009272,GO:0009277,GO:0009653,GO:0009987,GO:0010383,GO:0015926,GO:0016043,GO:0016787,GO:0016798,GO:0019953,GO:0022402,GO:0022413,GO:0022414,GO:0030154,GO:0030312,GO:0030428,GO:0030435,GO:…	K01210	13BGHe	fuNOG[21]	03NXA@ascNOG,0IHBU@euNOG,0PJVJ@fuNOG,12TM3@opiNOG,COG2730@NOG	NA|NA|NA	G	Glucan 1,3-beta-glucosidase
cF07090	40559.EDN31214	4.6e-244	849.4	FG08609.1	GO:0000272,GO:0003674,GO:0003824,GO:0004553,GO:0005975,GO:0005976,GO:0008150,GO:0008152,GO:0008422,GO:0009044,GO:0009056,GO:0009057,GO:0009251,GO:0009987,GO:0010383,GO:0010410,GO:0015926,GO:0016052,GO:0016740,GO:0016757,GO:0016763,GO:0016787,GO:0016798,GO:0019748,GO:0042285,GO:0043170,GO:0044036,GO:0044042,GO:0044237,GO:0044238,GO:0044260,GO:0044699,GO:0044710,GO:0044763,GO:0045491,GO:0045493,GO:…	K05349		fuNOG[21]	03JIV@ascNOG,0IGIA@euNOG,0PMFK@fuNOG,12PEQ@opiNOG,COG1472@NOG	NA|NA|NA	G	beta-glucosidase
cF07158	861557.XP_003300456.1	1.1e-123	450.3					fuNOG[21]	04C4P@ascNOG,0HBIU@dotNOG,0IV67@euNOG,0QEGB@fuNOG,111UJ@NOG,139MR@opiNOG,157MF@pleNOG	NA|NA|NA
cF07213	162425.CADANIAP00006922	4e-300	1035.8	FG10677.1	GO:0003674,GO:0003824,GO:0006464,GO:0008131,GO:0008150,GO:0008152,GO:0009987,GO:0010035,GO:0016491,GO:0016638,GO:0016641,GO:0018057,GO:0018149,GO:0018158,GO:0018193,GO:0018205,GO:0019538,GO:0036211,GO:0042221,GO:0043170,GO:0043412,GO:0044237,GO:0044238,GO:0044260,GO:0044267,GO:0044699,GO:0044710,GO:0044763,GO:0050896,GO:0051716,GO:0052597,GO:0055114,GO:0070887,GO:0071241,GO:0071704	K00276		fuNOG[21]	03IN7@ascNOG,0PFPW@fuNOG,13HVT@opiNOG,COG3733@NOG,KOG1186@euNOG	NA|NA|NA	Q	amine oxidase
cF07251	162425.CADANIAP00002938	1.6e-75	288.1	FG03713.1	GO:0000272,GO:0003674,GO:0003824,GO:0005575,GO:0005576,GO:0005975,GO:0005976,GO:0008150,GO:0008152,GO:0009056,GO:0009057,GO:0010393,GO:0016052,GO:0016829,GO:0016835,GO:0016837,GO:0030570,GO:0043170,GO:0044238,GO:0045488,GO:0045490,GO:0071704,GO:1901575			fuNOG[21]	03RAI@ascNOG,0IVZ1@euNOG,0MCMD@euroNOG,0MRC9@eurotNOG,0PN9G@fuNOG,0ZIM0@NOG,13PWD@opiNOG	NA|NA|NA	G	Pectinolytic enzyme consist of four classes of enzymes pectin lyase, polygalacturonase, pectin methylesterase and rhamnogalacturonase. Among pectinolytic enzymes, pectin lyase is the most important in depolymerization of pectin, since it cleaves internal glycosidic bonds of highly methylated pectins. Favors pectate, the anion, over pectin, the methyl ester
cF07264	367775.XP_003194332.1	1.9e-45	188.7	EXG1	GO:0000003,GO:0000935,GO:0003006,GO:0003674,GO:0003824,GO:0004338,GO:0004553,GO:0005575,GO:0005576,GO:0005618,GO:0005619,GO:0005623,GO:0005975,GO:0005976,GO:0006073,GO:0007049,GO:0008150,GO:0008152,GO:0008422,GO:0009272,GO:0009277,GO:0009653,GO:0009987,GO:0010383,GO:0015926,GO:0016043,GO:0016787,GO:0016798,GO:0019953,GO:0022402,GO:0022413,GO:0022414,GO:0030154,GO:0030312,GO:0030428,GO:0030435,GO:…	K01210	13BGHe	fuNOG[21]	09176@basNOG,0IHBU@euNOG,0PJVJ@fuNOG,12TM3@opiNOG,1CN4Q@treNOG,COG2730@NOG	NA|NA|NA	G	Cellulase (glycosyl hydrolase family 5)
cF07267	500485.XP_002557032.1	3.2e-67	260.8	FG07207.1				fuNOG[21]	03R4U@ascNOG,0IWIH@euNOG,0M5JB@euroNOG,0MPV1@eurotNOG,0PN43@fuNOG,10WB0@NOG,13Q4P@opiNOG	NA|NA|NA	G	Glycosyl hydrolases family 43
cF07298	36630.CADNFIAP00003422	2e-268	930.2	PGUG_05157		K01117		fuNOG[21]	03KVH@ascNOG,0MCHN@euroNOG,0MU0M@eurotNOG,0PK21@fuNOG,0YYPB@NOG,13I87@opiNOG,KOG3770@euNOG	NA|NA|NA	I	Inherit from ascNOG: Sphingomyelin phosphodiesterase
cF07312	5141.EFNCRP00000001420	1.6e-26	124					fuNOG[21]	03QWV@ascNOG,0IWWC@euNOG,0PNFI@fuNOG,0YBW9@NOG,13QH3@opiNOG	NA|NA|NA	G	endo-glucanase
cF07334	40559.EDN30541	2.7e-122	444.5		GO:0005575,GO:0005576			fuNOG[21]	03K2Y@ascNOG,0IFE6@euNOG,0PH5P@fuNOG,11WTG@NOG,12RZ5@opiNOG	NA|NA|NA	S	fasciclin domain family
cF07339	5057.CADACLAP00008671	1.5e-97	361.7					fuNOG[21]	03NNS@ascNOG,0IHWA@euNOG,0M414@euroNOG,0MHF2@eurotNOG,0PK3Q@fuNOG,11ZMV@NOG,12SAT@opiNOG	NA|NA|NA	S	GDSL lipase acylhydrolase family protein
cF07368	162425.CADANIAP00009641	6.5e-138	496.1					fuNOG[21]	040C4@ascNOG,0JED4@euNOG,0PY1P@fuNOG,100XM@NOG,1470P@opiNOG	NA|NA|NA
cF07375	40559.EDN31374	1.8e-42	178.7	DCW1	GO:0000003,GO:0003674,GO:0003824,GO:0004553,GO:0004559,GO:0005575,GO:0005618,GO:0005622,GO:0005623,GO:0005737,GO:0005783,GO:0005789,GO:0005886,GO:0005933,GO:0005975,GO:0005976,GO:0007114,GO:0007117,GO:0007124,GO:0008150,GO:0008152,GO:0008496,GO:0009056,GO:0009272,GO:0009311,GO:0009313,GO:0009897,GO:0009986,GO:0009987,GO:0012505,GO:0015923,GO:0016020,GO:0016049,GO:0016052,GO:0016787,GO:0016798,GO:…	K08257		fuNOG[21]	03IPW@ascNOG,0IE3C@euNOG,0PFRH@fuNOG,0XTMT@NOG,12XC0@opiNOG	NA|NA|NA	G	hydrolase family 76 protein
cF07477	5059.CADAFLAP00007437	1.9e-130	471.1					fuNOG[21]	03T81@ascNOG,0PPX6@fuNOG,13SZC@opiNOG,COG1957@NOG,KOG2938@euNOG	NA|NA|NA	F	Inosine-uridine preferring nucleoside hydrolase
cF07495	13684.SNOT_02018	8.4e-112	409.5	PEP1	GO:0005575,GO:0005576,GO:0006508,GO:0008150,GO:0008152,GO:0019538,GO:0043170,GO:0044238,GO:0071704	K01379,K06004		fuNOG[21]	03JP4@ascNOG,0H6GQ@dotNOG,0PH8I@fuNOG,0XNV7@NOG,12NU9@opiNOG,158EX@pleNOG,KOG1339@euNOG	NA|NA|NA	O	Secreted aspartic endopeptidase that allows assimilation of proteinaceous substrates. Can catalyze hydrolysis of the major structural proteins of basement membrane, elastin, collagen, and laminin
cF07522	426418.XP_001940336.1	1.3e-164	585.1	FG01603.1	GO:0003674,GO:0003824,GO:0004091,GO:0008150,GO:0008152,GO:0016787,GO:0016788,GO:0052689			fuNOG[21]	03NC2@ascNOG,0H4MA@dotNOG,0PJPI@fuNOG,13JAK@opiNOG,15AJZ@pleNOG,COG2272@NOG,KOG4389@euNOG	NA|NA|NA	T	Carboxylesterase family
cF07538	36630.CADNFIAP00003916	1e-17	95.5	FG03123.1	GO:0005575,GO:0005576			fuNOG[21]	03UGS@ascNOG,0J0YN@euNOG,0M94R@euroNOG,0MPE8@eurotNOG,0PRFZ@fuNOG,0YS83@NOG,13VEW@opiNOG	NA|NA|NA	S	antigenic cell wall galactomannoprotein
cF07563	861557.XP_003302578.1	7.4e-92	342.4	CPR2	GO:0000413,GO:0003674,GO:0003755,GO:0003824,GO:0005488,GO:0005515,GO:0005575,GO:0005622,GO:0005623,GO:0005737,GO:0005783,GO:0005788,GO:0005794,GO:0006464,GO:0008150,GO:0008152,GO:0009987,GO:0016020,GO:0016023,GO:0016043,GO:0016853,GO:0016859,GO:0018193,GO:0018208,GO:0019538,GO:0030198,GO:0031410,GO:0031974,GO:0031982,GO:0031988,GO:0036211,GO:0042470,GO:0043062,GO:0043170,GO:0043226,GO:0043227,GO:…	K03768,K03770		fuNOG[21]	03PC6@ascNOG,0H58X@dotNOG,0PFKS@fuNOG,0Z0G4@NOG,12NWW@opiNOG,15DBF@pleNOG,KOG0880@euNOG	NA|NA|NA	O	PPIases accelerate the folding of proteins (By similarity)
cF07672	162425.CADANIAP00006533	1.5e-72	278.5	MTR	GO:0005575,GO:0016020			fuNOG[21]	03N0E@ascNOG,0IVIU@euNOG,0MENV@euroNOG,0MKXE@eurotNOG,0PJ8V@fuNOG,0ZHR9@NOG,13PBX@opiNOG	NA|NA|NA	E	amino acid
cF07684	36630.CADNFIAP00007568	2.5e-151	540.8	FG04689.1	GO:0000272,GO:0003674,GO:0003824,GO:0005575,GO:0005576,GO:0005975,GO:0005976,GO:0008150,GO:0008152,GO:0009056,GO:0009057,GO:0010393,GO:0016052,GO:0016829,GO:0016835,GO:0016837,GO:0043170,GO:0044238,GO:0045488,GO:0045490,GO:0046576,GO:0071704,GO:1901575	K18580		fuNOG[21]	03MMI@ascNOG,0IHX4@euNOG,0ME60@euroNOG,0MKE9@eurotNOG,0PHHF@fuNOG,10FN4@NOG,13MG8@opiNOG	NA|NA|NA	G	Pectinolytic enzymes consist of four classes of enzymes pectine lyase, polygalacturonase, pectin methylesterase and rhamnogalacturonase. Hydrolyzes alpha-D-galacturonopyranosyl- (1,2)-alpha-L-rhamnopyranosyl linkages in the backbone of the hairy regions of pectins
cF07759	500485.XP_002560481.1	1.2e-241	841.3	GLAA	GO:0000003,GO:0000272,GO:0000322,GO:0000323,GO:0000324,GO:0003006,GO:0003674,GO:0003824,GO:0004339,GO:0004553,GO:0005575,GO:0005622,GO:0005623,GO:0005628,GO:0005737,GO:0005773,GO:0005783,GO:0005794,GO:0005975,GO:0005976,GO:0005977,GO:0005980,GO:0006073,GO:0006091,GO:0006112,GO:0007049,GO:0008150,GO:0008152,GO:0009056,GO:0009057,GO:0009251,GO:0009653,GO:0009986,GO:0009987,GO:0015926,GO:0015980,GO:…	K01178		fuNOG[21]	03NKF@ascNOG,0IGG8@euNOG,0M3J6@euroNOG,0MIU5@eurotNOG,0PJ6P@fuNOG,12SF0@opiNOG,COG3387@NOG	NA|NA|NA	G	glucan 1,4-alpha-glucosidase
cF07789	578455.XP_003656356.1	9.7e-239	831.6	FGSG_05622		K01194		fuNOG[21]	03WT9@ascNOG,0CSAD@chaNOG,0PGYP@fuNOG,12PIH@opiNOG,19W7Y@sordNOG,1A8CN@sorNOG,COG1626@NOG,KOG0602@euNOG	NA|NA|NA	G	Glycoside hydrolase family 37 protein
cF07798	13684.SNOT_07691	6.4e-74	282.7	FG08636.1				fuNOG[21]	03S1A@ascNOG,0H739@dotNOG,0IJ6X@euNOG,0PJIK@fuNOG,11NGA@NOG,13P4G@opiNOG,157U1@pleNOG	NA|NA|NA
cF07853	861557.XP_003298778.1	3.9e-197	693	FG06612.1				fuNOG[21]	03NC9@ascNOG,0H4AK@dotNOG,0IFDS@euNOG,0PKN9@fuNOG,13HDG@opiNOG,15E7G@pleNOG,COG2140@NOG	NA|NA|NA	G	Cupin_1
cF07890	306901.XP_001221609.1	3.7e-18	97.4	FG02190.1				fuNOG[21]	03VWY@ascNOG,0CQNE@chaNOG,0J7TV@euNOG,0PU4H@fuNOG,0YV7B@NOG,13Z67@opiNOG,19TIY@sordNOG,1A7SZ@sorNOG	NA|NA|NA	S	carbohydrate-binding module family 52 protein
cF07906	5061.CADANGAP00000318	2.7e-94	350.1	ERG2	GO:0000003,GO:0000247,GO:0003006,GO:0003674,GO:0003824,GO:0005575,GO:0005622,GO:0005623,GO:0005737,GO:0005783,GO:0005789,GO:0006066,GO:0006629,GO:0006694,GO:0006696,GO:0007049,GO:0008150,GO:0008152,GO:0008202,GO:0008204,GO:0008610,GO:0009058,GO:0009653,GO:0009987,GO:0012505,GO:0016020,GO:0016125,GO:0016126,GO:0016128,GO:0016129,GO:0016853,GO:0016860,GO:0016863,GO:0019953,GO:0022402,GO:0022413,GO:…	K09829	C8STI	fuNOG[21]	03NV2@ascNOG,0PGCM@fuNOG,0XP0Z@NOG,12PAF@opiNOG,KOG4143@euNOG	NA|NA|NA	I	C-8 sterol isomerase
cF07907	40559.EDN18671	5.6e-87	326.6	FG08150.1		K13333		fuNOG[21]	03WT2@ascNOG,0PVMQ@fuNOG,0XR72@NOG,140NN@opiNOG,KOG1325@euNOG	NA|NA|NA	I	PLAc
cF07914	29850.GGTG_10566T0	4e-48	196.8		GO:0005575,GO:0005576			fuNOG[21]	03SM3@ascNOG,0IZIX@euNOG,0PPN8@fuNOG,121AD@NOG,13TAQ@opiNOG,19S9G@sordNOG	NA|NA|NA	S	Cutinase
cF07917	500485.XP_002562090.1	4.5e-101	373.6		GO:0001503,GO:0001505,GO:0001507,GO:0001540,GO:0001649,GO:0002076,GO:0003008,GO:0003674,GO:0003824,GO:0003990,GO:0004091,GO:0004104,GO:0005488,GO:0005515,GO:0005518,GO:0005575,GO:0005576,GO:0005578,GO:0005604,GO:0005605,GO:0005615,GO:0005622,GO:0005623,GO:0005634,GO:0005737,GO:0005783,GO:0005788,GO:0005794,GO:0005886,GO:0006066,GO:0006139,GO:0006259,GO:0006260,GO:0006576,GO:0006581,GO:0006629,GO:…			fuNOG[21]	03P8W@ascNOG,0MA9E@euroNOG,0MKXX@eurotNOG,0PJV3@fuNOG,13N41@opiNOG,COG2272@NOG,KOG1516@euNOG	NA|NA|NA	I	Carboxylesterase family
cF07927	861557.XP_003300158.1	0	1432.9	FG05973.1	GO:0003674,GO:0003824,GO:0004553,GO:0004558,GO:0005575,GO:0005622,GO:0005623,GO:0005737,GO:0005739,GO:0005783,GO:0005788,GO:0005975,GO:0006950,GO:0007275,GO:0008150,GO:0008152,GO:0009272,GO:0009311,GO:0009636,GO:0009987,GO:0010035,GO:0010038,GO:0015926,GO:0016787,GO:0016798,GO:0017177,GO:0031974,GO:0032501,GO:0032502,GO:0032991,GO:0033919,GO:0042221,GO:0042546,GO:0043226,GO:0043227,GO:0043229,GO:…	K05546		fuNOG[21]	03MUK@ascNOG,0H3B5@dotNOG,0PH3V@fuNOG,12PAU@opiNOG,15A3K@pleNOG,COG1501@NOG,KOG1066@euNOG	NA|NA|NA	G	Glycosyl hydrolases family 31
cF08011	162425.CADANIAP00002798	2.2e-15	87.8		GO:0000003,GO:0000905,GO:0003006,GO:0005575,GO:0005576,GO:0007049,GO:0007275,GO:0008150,GO:0009653,GO:0009987,GO:0019953,GO:0019954,GO:0022402,GO:0022414,GO:0030154,GO:0030435,GO:0030582,GO:0030584,GO:0032501,GO:0032502,GO:0034293,GO:0043934,GO:0043935,GO:0044699,GO:0044707,GO:0044763,GO:0044767,GO:0048468,GO:0048513,GO:0048608,GO:0048610,GO:0048646,GO:0048731,GO:0048856,GO:0048869,GO:0061458,GO:…			fuNOG[21]	03T9A@ascNOG,0IZ6G@euNOG,0M8NQ@euroNOG,0MNGY@eurotNOG,0PQHQ@fuNOG,0YISQ@NOG,13T4U@opiNOG	NA|NA|NA	S	cell wall protein
cF08049	663202.XP_003019976.1	5e-22	112.1					fuNOG[21]	02Y7J@arthNOG,03P9B@ascNOG,0IJ4I@euNOG,0M2SJ@euroNOG,0PMB9@fuNOG,11KFS@NOG,12FNG@onyNOG,13I5N@opiNOG	NA|NA|NA	S	Inherit from euroNOG: conserved hypothetical protein
cF08062	5061.CADANGAP00003549	1.9e-125	454.5					NOG[107]	0XQGG@NOG	NA|NA|NA
cF08086	40559.EDN19587	2.2e-74	285.8					fuNOG[21]	03JNP@ascNOG,0PFGF@fuNOG,12S4K@opiNOG,COG2303@NOG,KOG1238@euNOG	NA|NA|NA	E	GMC oxidoreductase
cF08100	36630.CADNFIAP00004025	8.3e-39	165.2	FG02685.1				fuNOG[21]	03SN5@ascNOG,0IZ74@euNOG,0MB80@euroNOG,0MNZQ@eurotNOG,0PQ78@fuNOG,11PAQ@NOG,13SH2@opiNOG	NA|NA|NA
cF08126	13684.SNOT_01969	1.1e-106	392.5	FG07519.1	GO:0003674,GO:0005215,GO:0005337,GO:0005575,GO:0005622,GO:0005623,GO:0005737,GO:0005783,GO:0006810,GO:0008150,GO:0009987,GO:0015211,GO:0015858,GO:0015860,GO:0015931,GO:0015932,GO:0016020,GO:0016021,GO:0022857,GO:0022891,GO:0022892,GO:0031224,GO:0043226,GO:0043227,GO:0043229,GO:0043231,GO:0044424,GO:0044425,GO:0044444,GO:0044464,GO:0044699,GO:0044763,GO:0044765,GO:0051179,GO:0051234,GO:0055085,GO:…			fuNOG[21]	03N6V@ascNOG,0IGI6@euNOG,0PGQ0@fuNOG,13K4C@opiNOG,COG5042@NOG	NA|NA|NA	F	Purine nucleoside permease
cF08135	426418.XP_001940880.1	1.4e-222	778.1	LHS1	GO:0000166,GO:0000774,GO:0001882,GO:0001883,GO:0003674,GO:0005488,GO:0005515,GO:0005524,GO:0005575,GO:0005622,GO:0005623,GO:0005737,GO:0005783,GO:0005788,GO:0006457,GO:0006605,GO:0006612,GO:0006620,GO:0006810,GO:0006886,GO:0006950,GO:0006986,GO:0008104,GO:0008150,GO:0008152,GO:0009987,GO:0010033,GO:0015031,GO:0016482,GO:0017076,GO:0019222,GO:0019538,GO:0030234,GO:0030554,GO:0031204,GO:0031974,GO:…	K09486		fuNOG[21]	03JAV@ascNOG,0H57A@dotNOG,0PFF0@fuNOG,12NTZ@opiNOG,158B1@pleNOG,COG0443@NOG,KOG0104@euNOG	NA|NA|NA	O	Hsp70 protein
cF08172	13684.SNOT_00643	3.6e-09	67.4	PGUG_05585	GO:0003674,GO:0003824,GO:0003958,GO:0005488,GO:0005575,GO:0005622,GO:0005623,GO:0005634,GO:0005737,GO:0005829,GO:0006725,GO:0006778,GO:0006807,GO:0006950,GO:0007275,GO:0008150,GO:0008152,GO:0009987,GO:0016491,GO:0016651,GO:0016653,GO:0020037,GO:0032501,GO:0032502,GO:0033013,GO:0033554,GO:0042168,GO:0042221,GO:0042440,GO:0042493,GO:0043226,GO:0043227,GO:0043229,GO:0043231,GO:0043581,GO:0044237,GO:…			fuNOG[21]	03SSX@ascNOG,0H7W2@dotNOG,0PPBK@fuNOG,13CQX@opiNOG,157P7@pleNOG,COG5274@NOG,KOG0536@euNOG	NA|NA|NA	C	Inherit from dotNOG: Cytochrome b5-like Heme/Steroid binding domain
cF08173	13684.SNOT_00848	2e-47	193.7	FPR2	GO:0000413,GO:0003674,GO:0003755,GO:0003824,GO:0005488,GO:0005527,GO:0005528,GO:0005575,GO:0005622,GO:0005623,GO:0005634,GO:0005737,GO:0005783,GO:0005788,GO:0005789,GO:0006457,GO:0006464,GO:0008144,GO:0008150,GO:0008152,GO:0009987,GO:0012505,GO:0016020,GO:0016853,GO:0016859,GO:0018193,GO:0018208,GO:0019538,GO:0031090,GO:0031974,GO:0036211,GO:0042175,GO:0043170,GO:0043226,GO:0043227,GO:0043229,GO:…	K09569,K09577		fuNOG[21]	03RZZ@ascNOG,0H7ZP@dotNOG,0PQY3@fuNOG,13V3H@opiNOG,15C41@pleNOG,COG0545@NOG,KOG0549@euNOG	NA|NA|NA	O	peptidyl-prolyl cis-trans isomerase
cF08203	39416.CAZ79442	1.1e-42	181					fuNOG[21]	03J3P@ascNOG,0PK8I@fuNOG,100QS@NOG,135PI@opiNOG,KOG4157@euNOG	NA|NA|NA	G, O	WSC domain
cF08230	5062.CADAORAP00000068	1.8e-92	344.7	FG08495.1		K05986		fuNOG[21]	03QPN@ascNOG,0IF7M@euNOG,0MBNG@euroNOG,0MRJA@eurotNOG,0PFR1@fuNOG,11UE2@NOG,13I2G@opiNOG	NA|NA|NA	L	S1/P1 Nuclease
cF08241	441959.XP_002487406.1	2.9e-41	174.9	FG07207.1				fuNOG[21]	03R4U@ascNOG,0IWIH@euNOG,0M5JB@euroNOG,0MPV1@eurotNOG,0PN43@fuNOG,10WB0@NOG,13Q4P@opiNOG	NA|NA|NA	G	Glycosyl hydrolases family 43
cF08344	861557.XP_003295895.1	5.9e-15	87					fuNOG[21]	042QQ@ascNOG,0H9KG@dotNOG,0JQJS@euNOG,0Q0VF@fuNOG,0Y4XY@NOG,14ET1@opiNOG,15C82@pleNOG	NA|NA|NA	S	Inherit from ascNOG: cell wall protein
cF08345	578455.XP_003651468.1	1.1e-09	69.3					fuNOG[21]	03VZT@ascNOG,0CVQ1@chaNOG,0J6C8@euNOG,0PTNE@fuNOG,0YP7N@NOG,13ZUS@opiNOG,19T31@sordNOG,1AEJV@sorNOG	NA|NA|NA
cF08346	33178.CADATEAP00001130	4.2e-177	626.3	FG06612.1				fuNOG[21]	03NC9@ascNOG,0IFDS@euNOG,0PKN9@fuNOG,13HDG@opiNOG,COG2140@NOG	NA|NA|NA	G	Oxalate decarboxylase
cF08349	5059.CADAFLAP00010166	1.2e-154	552.4	FG06741.1				fuNOG[21]	03PT5@ascNOG,0IIWT@euNOG,0PHVV@fuNOG,10CV9@NOG,13I9F@opiNOG	NA|NA|NA
cF08400	526221.XP_003000769.1	5.2e-74	283.1	FG00099.1		K01674		fuNOG[21]	03RJB@ascNOG,0PN6H@fuNOG,13QVT@opiNOG,COG3338@NOG,KOG0382@euNOG	NA|NA|NA	P	Carb_anhydrase
cF08438	861557.XP_003305029.1	2.6e-131	474.2		GO:0005575,GO:0005576	K06004		fuNOG[21]	03ICX@ascNOG,0H4CZ@dotNOG,0PHZY@fuNOG,0XNV7@NOG,12SHD@opiNOG,1587E@pleNOG,KOG1339@euNOG	NA|NA|NA	O	Eukaryotic aspartyl protease
cF08461	861557.XP_003300532.1	4.8e-92	343.2	FG05400.1				fuNOG[21]	03N9X@ascNOG,0H79I@dotNOG,0IVNM@euNOG,0PJBA@fuNOG,11GNJ@NOG,13M1I@opiNOG,158EJ@pleNOG	NA|NA|NA	G	Glycosyl hydrolases family 16
cF08471	861557.XP_003301405.1	3.1e-104	384.4	FG06053.1		K05906		fuNOG[21]	03J8H@ascNOG,0H4WG@dotNOG,0IE2Q@euNOG,0PGAB@fuNOG,0Y3UN@NOG,12T2K@opiNOG,158M9@pleNOG	NA|NA|NA	O	Prenylcysteine lyase
cF08478	771870.XP_003344866.1	4.4e-80	304.3		GO:0003008,GO:0003674,GO:0003824,GO:0003990,GO:0004091,GO:0004104,GO:0006066,GO:0006576,GO:0006807,GO:0007154,GO:0007267,GO:0007268,GO:0007271,GO:0008150,GO:0008152,GO:0009308,GO:0009987,GO:0016787,GO:0016788,GO:0019226,GO:0019695,GO:0023052,GO:0032501,GO:0034641,GO:0035637,GO:0042439,GO:0044106,GO:0044237,GO:0044281,GO:0044699,GO:0044700,GO:0044707,GO:0044710,GO:0044763,GO:0050877,GO:0052689,GO:…			fuNOG[21]	03JRS@ascNOG,0PKN8@fuNOG,13NZ4@opiNOG,19J89@sordNOG,1ADCB@sorNOG,COG2272@NOG,KOG4389@euNOG	NA|NA|NA	T	Carboxylesterase family
cF08515	29875.EHK20454	7.2e-211	738.8	FG10604.1	GO:0003674,GO:0003824,GO:0008150,GO:0008152,GO:0016491,GO:0016679,GO:0016682,GO:0044710,GO:0052716,GO:0055114	K19791		fuNOG[21]	03NKM@ascNOG,0PGU0@fuNOG,0SCH8@hypNOG,13IAH@opiNOG,19IMX@sordNOG,COG2132@NOG,KOG1263@euNOG	NA|NA|NA	Q	Multicopper oxidase
cF08516	5180.EDN98178	2.4e-17	94.4					NOG[107]	0Z1H5@NOG	NA|NA|NA
cF08550	426418.XP_001933813.1	9.3e-51	206.5	FG00640.1				fuNOG[21]	03TXP@ascNOG,0H7IG@dotNOG,0J180@euNOG,0PQZA@fuNOG,0XX98@NOG,13UV5@opiNOG,15CCG@pleNOG	NA|NA|NA	S	Inherit from ascNOG: Conserved hypothetical protein
cF08554	500485.XP_002569028.1	5.4e-84	317.4	FG08002.1				fuNOG[21]	03MSP@ascNOG,0IVJD@euNOG,0MD80@euroNOG,0MH5F@eurotNOG,0PM15@fuNOG,10E4E@NOG,13NK7@opiNOG	NA|NA|NA
cF08587	5022.CBX95029	3.2e-141	507.7	APC5	GO:0000151,GO:0000152,GO:0005575,GO:0005622,GO:0005623,GO:0005634,GO:0005680,GO:0006139,GO:0006259,GO:0006323,GO:0006325,GO:0006333,GO:0006464,GO:0006508,GO:0006511,GO:0006725,GO:0006807,GO:0006996,GO:0007088,GO:0007346,GO:0008054,GO:0008150,GO:0008152,GO:0009056,GO:0009057,GO:0009987,GO:0010498,GO:0010564,GO:0016043,GO:0016567,GO:0019538,GO:0019941,GO:0022607,GO:0030071,GO:0030163,GO:0031145,GO:…	K03352		fuNOG[21]	03MVM@ascNOG,0H5PJ@dotNOG,0PHQY@fuNOG,0YVZN@NOG,12QGQ@opiNOG,15AWT@pleNOG,KOG4322@euNOG	NA|NA|NA	D, O	Inherit from ascNOG: Anaphase-Promoting Complex
cF08606	5061.CADANGAP00009817	2.6e-179	634.4	FGSG_11170				fuNOG[21]	03PS7@ascNOG,0IGZ4@euNOG,0PKQP@fuNOG,0XS6V@NOG,13FSY@opiNOG	NA|NA|NA	G	Inherit from NOG: Glycoside hydrolase family 78 protein
cF08699	5061.CADANGAP00002045	3.4e-247	859.8	FG06174.1	GO:0003674,GO:0003756,GO:0003824,GO:0005575,GO:0005622,GO:0005623,GO:0005737,GO:0005783,GO:0005789,GO:0005794,GO:0006457,GO:0006621,GO:0008104,GO:0008150,GO:0008152,GO:0009987,GO:0012505,GO:0016020,GO:0016853,GO:0016860,GO:0016862,GO:0016864,GO:0019538,GO:0031090,GO:0032507,GO:0033036,GO:0033365,GO:0034613,GO:0034975,GO:0035437,GO:0042175,GO:0043170,GO:0043226,GO:0043227,GO:0043229,GO:0043231,GO:…	K13984,K13996		fuNOG[21]	03NU2@ascNOG,0M5HP@euroNOG,0MKJ8@eurotNOG,0PJ6R@fuNOG,13EIA@opiNOG,COG0526@NOG,KOG0191@euNOG	NA|NA|NA	O	disulfide isomerase
cF08730	306901.XP_001225652.1	5e-19	99	FG10735.1				fuNOG[21]	03W08@ascNOG,0CVD7@chaNOG,0J685@euNOG,0PTP4@fuNOG,0Y566@NOG,13YXE@opiNOG,19TFZ@sordNOG,1AC8Q@sorNOG	NA|NA|NA
cF08734	5061.CADANGAP00011940	2.2e-96	357.8	EGLD	GO:0005575,GO:0005576	K19356		fuNOG[21]	03TRP@ascNOG,0JBJX@euNOG,0PWTS@fuNOG,0YI33@NOG,13VSE@opiNOG	NA|NA|NA	G	Has endoglucanase activity on substrates containing beta-1,4 glycosidic bonds, like in carboxymethylcellulose (CMC), hydroxyethylcellulose (HEC) and beta-glucan. Involved in the degradation of complex natural cellulosic substrates (By similarity)
cF08800	13684.SNOT_15051	2.2e-45	188.3	FG02338.1				fuNOG[21]	03Z1S@ascNOG,0HB3C@dotNOG,0JBXJ@euNOG,0PWQ5@fuNOG,0YHVK@NOG,144II@opiNOG,15EKR@pleNOG	NA|NA|NA	S	FAS1
cF08810	861557.XP_003298835.1	3.8e-215	753.1	FG07171.1	GO:0000922,GO:0005575,GO:0005622,GO:0005623,GO:0005634,GO:0005737,GO:0005815,GO:0005816,GO:0005819,GO:0005829,GO:0005856,GO:0006109,GO:0006111,GO:0006508,GO:0006511,GO:0008150,GO:0008152,GO:0009056,GO:0009057,GO:0009889,GO:0009890,GO:0009892,GO:0009987,GO:0010498,GO:0010565,GO:0010675,GO:0010677,GO:0010906,GO:0015630,GO:0019222,GO:0019538,GO:0019941,GO:0030163,GO:0031323,GO:0031324,GO:0031326,GO:…	K01188		fuNOG[21]	03MR5@ascNOG,0H612@dotNOG,0PJ1V@fuNOG,0XQ2U@NOG,12TZB@opiNOG,15CRT@pleNOG,KOG0293@euNOG	NA|NA|NA	G	Inherit from dotNOG: WD domain, G-beta repeat
cF08812	40559.EDN32452	3.1e-101	374	FG04685.1				fuNOG[21]	03KPV@ascNOG,0IF84@euNOG,0PHR9@fuNOG,13M9F@opiNOG,COG3485@NOG	NA|NA|NA	Q	GPI anchored dioxygenase
cF08830	5022.CBX97609	4.3e-289	999.2	HRD3	GO:0000151,GO:0000153,GO:0000835,GO:0000836,GO:0000838,GO:0000839,GO:0005575,GO:0005622,GO:0005623,GO:0005737,GO:0005783,GO:0005788,GO:0005789,GO:0006464,GO:0006508,GO:0006511,GO:0008150,GO:0008152,GO:0009056,GO:0009057,GO:0009987,GO:0010498,GO:0012505,GO:0016020,GO:0016567,GO:0019538,GO:0019941,GO:0030163,GO:0030433,GO:0031090,GO:0031974,GO:0032446,GO:0032991,GO:0034099,GO:0036211,GO:0042175,GO:…	K07126,K14023,K14026		fuNOG[21]	03QDD@ascNOG,0H6AU@dotNOG,0PFCT@fuNOG,12NN4@opiNOG,15B3T@pleNOG,COG0790@NOG,KOG1550@euNOG	NA|NA|NA	O	Sel1 repeat
cF08848	861557.XP_003298173.1	4.4e-100	370.2	PGUG_04244	GO:0000003,GO:0005575,GO:0005622,GO:0005623,GO:0005737,GO:0005739,GO:0005783,GO:0005886,GO:0006139,GO:0006259,GO:0006310,GO:0006725,GO:0006807,GO:0007049,GO:0007126,GO:0007127,GO:0007131,GO:0008150,GO:0008152,GO:0009987,GO:0016020,GO:0022402,GO:0034641,GO:0035825,GO:0043170,GO:0043226,GO:0043227,GO:0043229,GO:0043231,GO:0044237,GO:0044238,GO:0044260,GO:0044424,GO:0044444,GO:0044464,GO:0044699,GO:…			fuNOG[21]	03PCQ@ascNOG,0H6QY@dotNOG,0IGCG@euNOG,0PKXI@fuNOG,11M7X@NOG,12TCJ@opiNOG,157HE@pleNOG	NA|NA|NA	S	Putative stress-responsive nuclear envelope protein
cF08861	13684.SNOT_09192	1.1e-173	615.9	FG02611.1	GO:0005575,GO:0005622,GO:0005623,GO:0005737,GO:0005783,GO:0005789,GO:0006457,GO:0008150,GO:0008152,GO:0009987,GO:0012505,GO:0016020,GO:0016021,GO:0019538,GO:0030176,GO:0031090,GO:0031224,GO:0031227,GO:0031300,GO:0031301,GO:0034975,GO:0042175,GO:0043170,GO:0043226,GO:0043227,GO:0043229,GO:0043231,GO:0044237,GO:0044238,GO:0044260,GO:0044267,GO:0044422,GO:0044424,GO:0044425,GO:0044432,GO:0044444,GO:…			fuNOG[21]	03M4J@ascNOG,0H6UA@dotNOG,0PJQE@fuNOG,116S0@NOG,12SYH@opiNOG,15AD4@pleNOG,KOG1396@euNOG	NA|NA|NA	S	Sad1 / UNC-like C-terminal
cF08920	5062.CADAORAP00011015	6e-141	505.8	CATB	GO:0005575,GO:0005576	K03781		fuNOG[21]	03M7A@ascNOG,0M62R@euroNOG,0MKEH@eurotNOG,0PM93@fuNOG,12ZSP@opiNOG,COG0753@NOG,KOG0047@euNOG	NA|NA|NA	P	Occurs in almost all aerobically respiring organisms and serves to protect cells from the toxic effects of hydrogen peroxide
cF08933	1047171.EFQ36273	1.5e-207	728.8	FG03742.1		K19069		fuNOG[21]	03KES@ascNOG,0H63B@dotNOG,0PHG9@fuNOG,12Q3U@opiNOG,COG2303@NOG,KOG1238@euNOG	NA|NA|NA	E	FAD binding domain
cF08954	861557.XP_003301708.1	7.4e-210	735.3	SUB8	GO:0000003,GO:0000322,GO:0000323,GO:0000324,GO:0000328,GO:0000746,GO:0000747,GO:0003674,GO:0003824,GO:0004091,GO:0004175,GO:0004252,GO:0005575,GO:0005576,GO:0005615,GO:0005618,GO:0005619,GO:0005622,GO:0005623,GO:0005737,GO:0005773,GO:0005775,GO:0005794,GO:0006139,GO:0006401,GO:0006508,GO:0006725,GO:0006807,GO:0006914,GO:0006950,GO:0006995,GO:0006996,GO:0007033,GO:0007039,GO:0007154,GO:0007275,GO:…	K01336		fuNOG[21]	03K64@ascNOG,0H401@dotNOG,0PFG2@fuNOG,13IFF@opiNOG,15ACQ@pleNOG,COG1404@NOG,KOG1153@euNOG	NA|NA|NA	O	Peptidase inhibitor I9
cF08960	426418.XP_001932373.1	7.3e-42	176.8	FG08506.1				fuNOG[21]	03SP1@ascNOG,0H8QW@dotNOG,0IZNR@euNOG,0PPQG@fuNOG,0YEPT@NOG,13TMJ@opiNOG,15AJM@pleNOG	NA|NA|NA	S	Inherit from ascNOG: Conserved hypothetical protein
cF08987	861557.XP_003305498.1	3.3e-227	793.1	FG04022.1	GO:0005575,GO:0005622,GO:0005623,GO:0005737,GO:0005829,GO:0044424,GO:0044444,GO:0044464	K01426		fuNOG[21]	03JQ5@ascNOG,0H5FC@dotNOG,0PGSJ@fuNOG,12PBH@opiNOG,15DKB@pleNOG,COG0154@NOG,KOG1211@euNOG	NA|NA|NA	J	Amidase
cF08991	426418.XP_001940701.1	4e-220	769.6		GO:0000041,GO:0003674,GO:0003824,GO:0004322,GO:0005575,GO:0005622,GO:0005623,GO:0005737,GO:0005783,GO:0005886,GO:0006810,GO:0006811,GO:0006812,GO:0006826,GO:0006873,GO:0006875,GO:0006879,GO:0007275,GO:0008150,GO:0008152,GO:0009987,GO:0015684,GO:0016020,GO:0016491,GO:0016722,GO:0016724,GO:0019725,GO:0030001,GO:0030003,GO:0032501,GO:0032502,GO:0033212,GO:0033215,GO:0034220,GO:0034755,GO:0042592,GO:…	K19791		fuNOG[21]	03KS3@ascNOG,0H3DK@dotNOG,0PHHS@fuNOG,12Q5N@opiNOG,15821@pleNOG,COG2132@NOG,KOG1263@euNOG	NA|NA|NA	Q	Multicopper oxidase
cF08995	13684.SNOT_12730	7.2e-08	65.1					fuNOG[21]	03VK4@ascNOG,0H7DM@dotNOG,0J3EE@euNOG,0PS6M@fuNOG,0Y44A@NOG,13YDR@opiNOG,157QZ@pleNOG	NA|NA|NA
cF09001	426418.XP_001930944.1	1.5e-77	295					fuNOG[21]	03RDS@ascNOG,0H9KQ@dotNOG,0IWXW@euNOG,0PNAK@fuNOG,13PV8@opiNOG,15BXI@pleNOG,COG3509@NOG	NA|NA|NA	Q	Esterase PHB depolymerase
cF09060	426418.XP_001933267.1	2.8e-44	185.3	FG07065.1				fuNOG[21]	03UFB@ascNOG,0H8HP@dotNOG,0J0AM@euNOG,0PRSI@fuNOG,12B8V@NOG,13UCT@opiNOG,15BM9@pleNOG	NA|NA|NA
cF09065	5061.CADANGAP00012600	2.4e-220	770					fuNOG[21]	044H4@ascNOG,0IGI7@euNOG,0MB48@euroNOG,0MSCH@eurotNOG,0Q1PH@fuNOG,14HMV@opiNOG,COG3511@NOG	NA|NA|NA	I	Phosphoesterase family
cF09072	426418.XP_001937454.1	8.4e-236	822	PGUG_04783				fuNOG[21]	03KT9@ascNOG,0H4YB@dotNOG,0IGPT@euNOG,0PI20@fuNOG,12PMB@opiNOG,1578V@pleNOG,COG3537@NOG	NA|NA|NA	G	Glycosyl hydrolase family 92
cF09087	13684.SNOT_00362	1.2e-127	463					fuNOG[21]	03KPE@ascNOG,0H35W@dotNOG,0PHQT@fuNOG,13MPA@opiNOG,15956@pleNOG,COG0647@NOG,KOG1618@euNOG	NA|NA|NA	G	Inherit from ascNOG: Phosphatidyl synthase
cF09163	426418.XP_001935262.1	2.7e-42	177.9					fuNOG[21]	040NN@ascNOG,0H998@dotNOG,0JFZB@euNOG,0PYV6@fuNOG,0YZYV@NOG,14827@opiNOG,15987@pleNOG	NA|NA|NA
cF09176	13684.SNOT_06148	1.2e-52	212.6	FG05933.1				fuNOG[21]	03NNK@ascNOG,0H49I@dotNOG,0IKDK@euNOG,0PFT9@fuNOG,13HQ3@opiNOG,157VC@pleNOG,COG0496@NOG	NA|NA|NA	G	Survival protein SurE
cF09213	5022.CBX97174	2.7e-106	391	FG03481.1	GO:0005575,GO:0005576	K01438		fuNOG[21]	03MCX@ascNOG,0HBIR@dotNOG,0PH1I@fuNOG,12R7P@opiNOG,157PS@pleNOG,COG0624@NOG,KOG2275@euNOG	NA|NA|NA	E	Peptidase dimerisation domain
cF09263	13684.SNOT_01504	0	1121.7	CWH41	GO:0003674,GO:0003824,GO:0004553,GO:0004573,GO:0005575,GO:0005622,GO:0005623,GO:0005737,GO:0005783,GO:0005789,GO:0005975,GO:0006464,GO:0006486,GO:0006487,GO:0008150,GO:0008152,GO:0009058,GO:0009059,GO:0009100,GO:0009101,GO:0009272,GO:0009987,GO:0012505,GO:0015926,GO:0016020,GO:0016787,GO:0016798,GO:0019538,GO:0031090,GO:0034645,GO:0036211,GO:0042175,GO:0042546,GO:0043170,GO:0043226,GO:0043227,GO:…	K01228		fuNOG[21]	03I88@ascNOG,0H65P@dotNOG,0PF8P@fuNOG,0XTHA@NOG,130BU@opiNOG,159P8@pleNOG,KOG2161@euNOG	NA|NA|NA	G	Mannosyl oligosaccharide glucosidase
cF09304	426418.XP_001940082.1	3e-231	806.6					fuNOG[21]	03IZT@ascNOG,0H3T8@dotNOG,0PJ5E@fuNOG,13JPN@opiNOG,COG2303@NOG,KOG1238@euNOG	NA|NA|NA	E	GMC oxidoreductase
cF09307	5022.CBX97954	3.7e-283	979.2			K00108		fuNOG[21]	03M37@ascNOG,0H5WK@dotNOG,0PI4D@fuNOG,12QUV@opiNOG,15B42@pleNOG,COG2303@NOG,KOG1238@euNOG	NA|NA|NA	E	GMC oxidoreductase
cF09309	13684.SNOT_08010	1.5e-171	607.8					fuNOG[21]	03PSM@ascNOG,0H46V@dotNOG,0IIQB@euNOG,0PKRB@fuNOG,106QT@NOG,139DV@opiNOG,15967@pleNOG	NA|NA|NA	S	Peroxidase, family 2
cF09342	5664.LmjF.35.0540	6.1e-23	116.3					euNOG[57]	0IGIF@euNOG,0XQS3@NOG	NA|NA|NA	S	AHNAK nucleoprotein
cF09373	229533.XP_382515.1	1e-185	655.2	PGUG_02777	GO:0000322,GO:0000323,GO:0000324,GO:0003674,GO:0003824,GO:0004553,GO:0004564,GO:0005575,GO:0005576,GO:0005622,GO:0005623,GO:0005634,GO:0005737,GO:0005739,GO:0005773,GO:0005829,GO:0005975,GO:0005984,GO:0005985,GO:0005987,GO:0006002,GO:0006793,GO:0006796,GO:0008150,GO:0008152,GO:0009056,GO:0009311,GO:0009313,GO:0009987,GO:0016052,GO:0016787,GO:0016798,GO:0019637,GO:0033530,GO:0034484,GO:0036008,GO:…	K01193	SUCRe	fuNOG[21]	03NSS@ascNOG,0PI7R@fuNOG,0SE9U@hypNOG,0X1A6@necNOG,12SJU@opiNOG,19QKC@sordNOG,COG1621@NOG,KOG0228@euNOG	NA|NA|NA	G	Glyco_32
cF09433	5062.CADAORAP00009678	5.5e-123	446.8		GO:0000041,GO:0003674,GO:0003824,GO:0004322,GO:0005575,GO:0005622,GO:0005623,GO:0005737,GO:0005783,GO:0005886,GO:0006810,GO:0006811,GO:0006812,GO:0006826,GO:0006873,GO:0006875,GO:0006879,GO:0008150,GO:0008152,GO:0009987,GO:0015684,GO:0016020,GO:0016491,GO:0016722,GO:0016724,GO:0019725,GO:0030001,GO:0030003,GO:0033212,GO:0033215,GO:0034220,GO:0034755,GO:0042592,GO:0043226,GO:0043227,GO:0043229,GO:…	K19791		fuNOG[21]	03KS3@ascNOG,0M6D4@euroNOG,0PHHS@fuNOG,12Q5N@opiNOG,COG2132@NOG,KOG1263@euNOG	NA|NA|NA	Q	iron transport multicopper oxidase FET3
cF09497	36630.CADNFIAP00003231	2.2e-197	693.7	FG04527.1		K01288		fuNOG[21]	03KW9@ascNOG,0MCD9@euroNOG,0MQJI@eurotNOG,0PHXN@fuNOG,13J5U@opiNOG,COG2939@NOG,KOG1282@euNOG	NA|NA|NA	E, O	Serine carboxypeptidase
cF09554	441959.XP_002480256.1	4.8e-91	339.7	FG00006.1				fuNOG[21]	03I9J@ascNOG,0IDXZ@euNOG,0M30I@euroNOG,0MN3I@eurotNOG,0PFAE@fuNOG,0Y8ZI@NOG,12N31@opiNOG	NA|NA|NA	S	Protein of unknown function (DUF3129)
cF09570	1047171.EFQ27320	5.5e-147	526.6					fuNOG[21]	03PN2@ascNOG,0H51E@dotNOG,0PKJZ@fuNOG,134BA@opiNOG,COG2272@NOG,KOG1516@euNOG	NA|NA|NA	I	Carboxylesterase family
cF09586	573729.XP_003665295.1	2.1e-77	294.7					fuNOG[21]	03Z2E@ascNOG,0CR8V@chaNOG,0J7AA@euNOG,0PWTM@fuNOG,0Y5I0@NOG,144NR@opiNOG,19UQU@sordNOG,1AD39@sorNOG	NA|NA|NA
cF09651	5022.CBX98109	4.1e-142	510.4					fuNOG[21]	03KNY@ascNOG,0H3CI@dotNOG,0PIFQ@fuNOG,13KBF@opiNOG,1589Q@pleNOG,COG2272@NOG,KOG4389@euNOG	NA|NA|NA	T	Carboxylesterase family
cF09762	5057.CADACLAP00004612	0	1223		GO:0000272,GO:0003674,GO:0003824,GO:0004553,GO:0004558,GO:0005575,GO:0005576,GO:0005618,GO:0005622,GO:0005623,GO:0005737,GO:0005783,GO:0005975,GO:0005976,GO:0005982,GO:0006073,GO:0008150,GO:0008152,GO:0009056,GO:0009057,GO:0009311,GO:0009313,GO:0009986,GO:0009987,GO:0015926,GO:0016052,GO:0016787,GO:0016798,GO:0030312,GO:0031160,GO:0043170,GO:0043226,GO:0043227,GO:0043229,GO:0043231,GO:0044042,GO:…	K01187		fuNOG[21]	03PH8@ascNOG,0M36U@euroNOG,0PHCX@fuNOG,12Q2U@opiNOG,COG1501@NOG,KOG1065@euNOG	NA|NA|NA	G	alpha-glucosidase
cF09772	36630.CADNFIAP00006597	3e-55	220.3	FG01466.1	GO:0005575,GO:0005622,GO:0005623,GO:0005737,GO:0005783,GO:0005788,GO:0005794,GO:0005796,GO:0031974,GO:0043226,GO:0043227,GO:0043229,GO:0043231,GO:0043233,GO:0044422,GO:0044424,GO:0044431,GO:0044432,GO:0044444,GO:0044446,GO:0044464,GO:0070013			fuNOG[21]	03RRZ@ascNOG,0IXMN@euNOG,0M391@euroNOG,0MNC3@eurotNOG,0PNVN@fuNOG,11RBX@NOG,13S5I@opiNOG	NA|NA|NA	S	Secretory pathway protein Ssp120
cF09805	5022.CBX93021	5.8e-41	173.7					fuNOG[21]	03TED@ascNOG,0HBB0@dotNOG,0IZN0@euNOG,0PPWF@fuNOG,11W61@NOG,13T92@opiNOG,157BC@pleNOG	NA|NA|NA	S	Yeast PIR protein repeat
cF09846	1047171.EFQ33667	3.9e-130	470.3	PGUG_03063	GO:0000322,GO:0000323,GO:0000324,GO:0003674,GO:0003756,GO:0003824,GO:0005575,GO:0005622,GO:0005623,GO:0005737,GO:0005739,GO:0005773,GO:0005783,GO:0005788,GO:0006457,GO:0006950,GO:0008150,GO:0008152,GO:0009266,GO:0009408,GO:0009628,GO:0009987,GO:0015035,GO:0015036,GO:0016491,GO:0016667,GO:0016853,GO:0016860,GO:0016862,GO:0016864,GO:0019538,GO:0031974,GO:0033554,GO:0034605,GO:0043170,GO:0043226,GO:…	K09584		fuNOG[21]	03KE2@ascNOG,0H5VJ@dotNOG,0PG1G@fuNOG,13KUV@opiNOG,COG0526@NOG,KOG0191@euNOG	NA|NA|NA	O	Thioredoxin
cF09850	40559.EDN27097	6.1e-111	406.4	FG06497.1				fuNOG[21]	03N5D@ascNOG,0IGS8@euNOG,0PJ72@fuNOG,0XQG8@NOG,12SUG@opiNOG	NA|NA|NA	S	Conserved hypothetical protein
cF09927	5180.EDO01992	4e-179	633.3	MNS1B	GO:0005575,GO:0005576,GO:0005622,GO:0005623,GO:0005737,GO:0016023,GO:0031410,GO:0031974,GO:0031982,GO:0031983,GO:0031988,GO:0043226,GO:0043227,GO:0043229,GO:0043231,GO:0043233,GO:0044422,GO:0044424,GO:0044433,GO:0044444,GO:0044446,GO:0044464,GO:0060205	K01230		fuNOG[21]	03N19@ascNOG,0PM8H@fuNOG,0XP04@NOG,13K36@opiNOG,KOG2204@euNOG	NA|NA|NA	G	Involved in the maturation of Asn-linked oligosaccharides. Progressively trims alpha-1,2-linked mannose residues from Man(9)GlcNAc(2) to produce Man(5)GlcNAc(2)
cF09941	554155.XP_002848370.1	3.1e-214	750	PGUG_00354	GO:0005575,GO:0005576,GO:0005622,GO:0005623,GO:0005737,GO:0005783,GO:0005789,GO:0008150,GO:0009405,GO:0012505,GO:0016020,GO:0016021,GO:0031090,GO:0031224,GO:0042175,GO:0043226,GO:0043227,GO:0043229,GO:0043231,GO:0044422,GO:0044424,GO:0044425,GO:0044432,GO:0044444,GO:0044446,GO:0044464,GO:0051704	K09704		fuNOG[21]	02YXW@arthNOG,03NP4@ascNOG,0IFJ3@euNOG,0M7GR@euroNOG,0PFTS@fuNOG,12GR9@onyNOG,12P3V@opiNOG,COG3538@NOG	NA|NA|NA	S	Protein of unknown function (DUF1237)

## Sheet: S7
TableS7-annotation of the secreted proteins in P. citricarpa
tF00036	318829.MGG_07475T0	6.7e-28	129	FG07427.1				fuNOG[21]	03N78@ascNOG,0IIPG@euNOG,0PKQK@fuNOG,11J1U@NOG,13PDS@opiNOG,19KV4@sordNOG	NA|NA|NA	S	Inherit from ascNOG: tyrosine serine protein phosphatase
tF00063	452471.Aasi_0340	1.8e-21	108.2					bactNOG[38]	05EWF@bactNOG,09DS1@bctoNOG,COG0666@NOG,COG0790@NOG	NA|NA|NA	S	Tetratricopeptide repeat
tF00065	5022.CBX92329	7.3e-280	968.4		GO:0003674,GO:0003824,GO:0004553,GO:0008150,GO:0008152,GO:0008422,GO:0015926,GO:0016787,GO:0016798	K05349		fuNOG[21]	03MNJ@ascNOG,0H4RX@dotNOG,0IG0I@euNOG,0PIQB@fuNOG,13M4P@opiNOG,15DHV@pleNOG,COG1472@NOG	NA|NA|NA	G	Fn3_like
tF00081	13684.SNOT_08010	2.3e-172	610.5					fuNOG[21]	03PSM@ascNOG,0H46V@dotNOG,0IIQB@euNOG,0PKRB@fuNOG,106QT@NOG,139DV@opiNOG,15967@pleNOG	NA|NA|NA	S	Peroxidase, family 2
tF00082	426418.XP_001940792.1	1.3e-254	884	CPYA	GO:0000322,GO:0000323,GO:0000324,GO:0000328,GO:0003674,GO:0003824,GO:0004180,GO:0004185,GO:0005488,GO:0005515,GO:0005575,GO:0005622,GO:0005623,GO:0005737,GO:0005773,GO:0005775,GO:0005783,GO:0006518,GO:0006807,GO:0007039,GO:0007275,GO:0008150,GO:0008152,GO:0008233,GO:0008236,GO:0008238,GO:0009056,GO:0009057,GO:0009058,GO:0009987,GO:0016787,GO:0017171,GO:0019538,GO:0019748,GO:0030163,GO:0031974,GO:…	K13289		fuNOG[21]	03JXP@ascNOG,0H55Z@dotNOG,0PFU0@fuNOG,12T1C@opiNOG,158K5@pleNOG,COG2939@NOG,KOG1282@euNOG	NA|NA|NA	O	Vacuolar carboxypeptidase involved in degradation of small peptides. Digests preferentially peptides containing an aliphatic or hydrophobic residue in P1' position, as well as methionine, leucine or phenylalanine in P1 position of ester substrate (By similarity)
tF00092	5022.CBX96299	7.7e-186	655.6	GPI16	GO:0003674,GO:0003824,GO:0003923,GO:0005575,GO:0005622,GO:0005623,GO:0005737,GO:0005783,GO:0005789,GO:0006464,GO:0006497,GO:0006505,GO:0006506,GO:0006629,GO:0006643,GO:0006644,GO:0006650,GO:0006661,GO:0006664,GO:0006793,GO:0006796,GO:0008150,GO:0008152,GO:0008610,GO:0008654,GO:0009058,GO:0009059,GO:0009247,GO:0009987,GO:0012505,GO:0016020,GO:0016021,GO:0016255,GO:0016787,GO:0019538,GO:0019637,GO:…	K05292		fuNOG[21]	03KDX@ascNOG,0H4NU@dotNOG,0PIR6@fuNOG,0XRR0@NOG,12S4Z@opiNOG,158KH@pleNOG,KOG2407@euNOG	NA|NA|NA	M, O	Gpi16 subunit, GPI transamidase component
tF00096	222929.XP_003069064.1	2.9e-46	191.4					fuNOG[21]	03ZEX@ascNOG,0JCRW@euNOG,0MG26@euroNOG,0PX2X@fuNOG,0YJWT@NOG,12GFW@onyNOG,145FG@opiNOG	NA|NA|NA
tF00127	441960.XP_002153608.1	4.6e-84	317.4					fuNOG[21]	03M44@ascNOG,0M6F3@euroNOG,0MRR9@eurotNOG,0PI5P@fuNOG,13PAE@opiNOG,COG2124@NOG,KOG0158@euNOG	NA|NA|NA	Q	cytochrome p450
tF00137	13684.SNOT_04825	1.7e-129	468.8	PGUG_01011				fuNOG[21]	03P8B@ascNOG,0H5XD@dotNOG,0IGPA@euNOG,0PKK1@fuNOG,0XR8Z@NOG,13NI4@opiNOG,15B6V@pleNOG	NA|NA|NA	S	Peptide N-acetyl-beta-D-glucosaminyl asparaginase amidase A
tF00139	1047171.EFQ27394	3.2e-54	217.6	FG03968.1				fuNOG[21]	03MU0@ascNOG,0IIWN@euNOG,0PKTY@fuNOG,11S31@NOG,12UE0@opiNOG	NA|NA|NA	S	Glycosyl hydrolase family 61
tF00141	578455.XP_003652266.1	4.1e-49	200.3		GO:0005575,GO:0005576			fuNOG[21]	03MNG@ascNOG,0CS4X@chaNOG,0IJXI@euNOG,0PJE8@fuNOG,0Z8DT@NOG,13NPN@opiNOG,19VAM@sordNOG,1ADWI@sorNOG	NA|NA|NA	G	glycoside hydrolase family 45 protein
tF00147	5022.CBX96965	2.6e-81	307.4	FG01615.1				fuNOG[21]	03KEJ@ascNOG,0H45K@dotNOG,0IF1A@euNOG,0PHG2@fuNOG,0Y6Q4@NOG,13M3D@opiNOG,15BI7@pleNOG	NA|NA|NA	S	LicD family
tF00148	5518.FGSG_07608P0	1.1e-73	282.3	FG07608.1	GO:0005575,GO:0005576	K03787		fuNOG[21]	03QJB@ascNOG,0IKDK@euNOG,0PM92@fuNOG,0SIQX@hypNOG,0WTWC@necNOG,13KDU@opiNOG,1A31B@sordNOG,COG0496@NOG	NA|NA|NA	F	Survival protein SurE
tF00184	5022.CBX97353	1e-171	608.6	FG05679.1	GO:0007275,GO:0008150,GO:0032501,GO:0032502,GO:0043581,GO:0044699,GO:0044707,GO:0044767,GO:0048856			fuNOG[21]	03JS0@ascNOG,0H46R@dotNOG,0IGM7@euNOG,0PGUC@fuNOG,0Z3WK@NOG,13HTS@opiNOG,15CT4@pleNOG	NA|NA|NA	S	Protein of unknown function (DUF3445)
tF00218	5061.CADANGAP00008395	1.9e-195	687.6			K01188		fuNOG[21]	0428Z@ascNOG,0PFTX@fuNOG,12NH9@opiNOG,COG2723@NOG,KOG0626@euNOG	NA|NA|NA	G	Glycosyl hydrolase family 1
tF00221	573729.XP_003666007.1	1e-80	305.4	FG03406.1		K01051		fuNOG[21]	03NP2@ascNOG,0CRDQ@chaNOG,0IEHP@euNOG,0PJNK@fuNOG,13J9A@opiNOG,19VGY@sordNOG,1A9VA@sorNOG,COG4677@NOG	NA|NA|NA	G	carbohydrate esterase family 8 protein (EC 3.1.1.11)
tF00231	13684.SNOT_12035	2.8e-48	197.6	FG10787.1		K11244		fuNOG[21]	03SZM@ascNOG,0H835@dotNOG,0J02Z@euNOG,0PQ1T@fuNOG,11WHY@NOG,13T7S@opiNOG,15AAB@pleNOG	NA|NA|NA	S	WSC domain
tF00245	5061.CADANGAP00008395	5.6e-208	729.2			K01188		fuNOG[21]	0428Z@ascNOG,0PFTX@fuNOG,12NH9@opiNOG,COG2723@NOG,KOG0626@euNOG	NA|NA|NA	G	Glycosyl hydrolase family 1
tF00268	5022.CBY01668	3.4e-211	740			K01188		fuNOG[21]	0428Z@ascNOG,0PFTX@fuNOG,12NH9@opiNOG,COG2723@NOG,KOG0626@euNOG	NA|NA|NA	G	Glycosyl hydrolase family 1
tF00299	441959.XP_002480629.1	1.8e-75	288.5	FG08494.1				fuNOG[21]	03PRD@ascNOG,0IG6E@euNOG,0M6V2@euroNOG,0MR25@eurotNOG,0PJIS@fuNOG,11GIR@NOG,13N9V@opiNOG	NA|NA|NA	S	Inherit from euroNOG: conserved hypothetical protein
tF00337	40559.EDN31311	4.6e-17	95.5					fuNOG[21]	03RXE@ascNOG,0IY6I@euNOG,0PNXQ@fuNOG,11KB1@NOG,13SFK@opiNOG	NA|NA|NA
tF00348	5062.CADAORAP00007909	2.4e-37	160.2	PGUG_00135	GO:0005575,GO:0005622,GO:0005623,GO:0005737,GO:0005739,GO:0005740,GO:0005743,GO:0006461,GO:0006996,GO:0007005,GO:0008150,GO:0008535,GO:0009987,GO:0016020,GO:0016021,GO:0016043,GO:0019866,GO:0022607,GO:0031090,GO:0031224,GO:0031300,GO:0031301,GO:0031304,GO:0031305,GO:0031966,GO:0031967,GO:0031975,GO:0032592,GO:0033108,GO:0033617,GO:0034622,GO:0043226,GO:0043227,GO:0043229,GO:0043231,GO:0043623,GO:…	K18173		fuNOG[21]	03T1W@ascNOG,0IXZ4@euNOG,0PQ3R@fuNOG,1229I@NOG,13STA@opiNOG	NA|NA|NA	S	mitochondrial inner membrane protein
tF00351	426418.XP_001933319.1	2.8e-128	463.8	FG01240.1				fuNOG[21]	03PTU@ascNOG,0H658@dotNOG,0PK4T@fuNOG,12TD6@opiNOG,159YZ@pleNOG,COG3675@NOG,KOG4569@euNOG	NA|NA|NA	I	Lipase (class 3)
tF00382	222929.XP_003071653.1	1.1e-88	332					fuNOG[21]	03QWZ@ascNOG,0IWEP@euNOG,0M5W3@euroNOG,0PMYI@fuNOG,11QCS@NOG,12K1J@onyNOG,13Q9D@opiNOG	NA|NA|NA	S	LicD family
tF00384	162425.CADANIAP00006682	4.5e-61	240	FG07250.1	GO:0000322,GO:0000323,GO:0000324,GO:0000329,GO:0005575,GO:0005622,GO:0005623,GO:0005737,GO:0005773,GO:0005774,GO:0005783,GO:0005794,GO:0006810,GO:0006888,GO:0008150,GO:0009987,GO:0016020,GO:0016192,GO:0016482,GO:0031090,GO:0043226,GO:0043227,GO:0043229,GO:0043231,GO:0044422,GO:0044424,GO:0044437,GO:0044444,GO:0044446,GO:0044464,GO:0044699,GO:0044763,GO:0044765,GO:0046907,GO:0048193,GO:0051179,GO:…	K10082		fuNOG[21]	03JH2@ascNOG,0M537@euroNOG,0MHPN@eurotNOG,0PHCK@fuNOG,0YH8V@NOG,12UBE@opiNOG,KOG3839@euNOG	NA|NA|NA	U	Lectin family integral membrane protein
tF00406	861557.XP_003304991.1	3.2e-107	394.4			K01480		fuNOG[21]	03J00@ascNOG,0H93K@dotNOG,0PI69@fuNOG,12RTM@opiNOG,15DNG@pleNOG,COG0010@NOG,KOG2964@euNOG	NA|NA|NA	E	Arginase family
tF00481	861557.XP_003303337.1	2.6e-138	497.3	EXG1	GO:0000003,GO:0000935,GO:0003006,GO:0003674,GO:0003824,GO:0004338,GO:0004553,GO:0005575,GO:0005576,GO:0005618,GO:0005619,GO:0005623,GO:0005975,GO:0005976,GO:0006073,GO:0007049,GO:0008150,GO:0008152,GO:0008422,GO:0009272,GO:0009277,GO:0009653,GO:0009987,GO:0010383,GO:0015926,GO:0016043,GO:0016787,GO:0016798,GO:0019953,GO:0022402,GO:0022413,GO:0022414,GO:0030154,GO:0030312,GO:0030428,GO:0030435,GO:…	K01210	13BGHe	fuNOG[21]	03NXA@ascNOG,0H9M4@dotNOG,0IHBU@euNOG,0PJVJ@fuNOG,12TM3@opiNOG,15A1J@pleNOG,COG2730@NOG	NA|NA|NA	G	Cellulase (glycosyl hydrolase family 5)
tF00519	336963.XP_002541960.1	8.9e-52	209.9	TOS1	GO:0000271,GO:0000322,GO:0000323,GO:0000324,GO:0003674,GO:0003824,GO:0003843,GO:0005575,GO:0005576,GO:0005618,GO:0005622,GO:0005623,GO:0005737,GO:0005773,GO:0005783,GO:0005975,GO:0005976,GO:0006073,GO:0006074,GO:0006075,GO:0008150,GO:0008152,GO:0008194,GO:0009058,GO:0009059,GO:0009250,GO:0009272,GO:0009277,GO:0009987,GO:0010383,GO:0016051,GO:0016740,GO:0016757,GO:0016758,GO:0030312,GO:0033692,GO:…			fuNOG[21]	03MHD@ascNOG,0IFV9@euNOG,0MG61@euroNOG,0PIIZ@fuNOG,0XSZW@NOG,12F2D@onyNOG,12S8R@opiNOG	NA|NA|NA	S	Glycine-rich protein domain (DUF2403)
tF00527	13684.SNOT_01753	6.5e-78	296.2		GO:0005575,GO:0005576			fuNOG[21]	03M8D@ascNOG,0H7K9@dotNOG,0IFMM@euNOG,0PIAE@fuNOG,0XPH7@NOG,1300I@opiNOG,15A70@pleNOG	NA|NA|NA	O	Pregnancy-associated plasma protein-A
tF00548	117187.FVEG_12928T0	2.8e-129	467.2	FG07678.1		K01078		fuNOG[21]	03K63@ascNOG,0IK4H@euNOG,0PH8E@fuNOG,0SATA@hypNOG,0WYK5@necNOG,105F1@NOG,134GJ@opiNOG,1A720@sordNOG	NA|NA|NA	S	Phosphoesterase family
tF00569	5022.CBX94846	0	1100.5	FG03570.1	GO:0005575,GO:0005576			fuNOG[21]	03Q1W@ascNOG,0H52A@dotNOG,0IF8V@euNOG,0PM1F@fuNOG,12TDY@opiNOG,157B6@pleNOG,COG1472@NOG	NA|NA|NA	G	Fn3_like
tF00611	5507.FOXG_09139P0	6.9e-88	329.3	FG04972.1				fuNOG[21]	03R1C@ascNOG,0IWNQ@euNOG,0PNK0@fuNOG,0SGMR@hypNOG,11G42@NOG,13Q8H@opiNOG,1A515@sordNOG	NA|NA|NA	S	Inherit from opiNOG: Conserved hypothetical protein
tF00636	426418.XP_001931045.1	4.5e-65	253.8					fuNOG[21]	03URP@ascNOG,0HAB0@dotNOG,0J4NQ@euNOG,0PT3X@fuNOG,0YQGW@NOG,13W5I@opiNOG,15BXN@pleNOG	NA|NA|NA
tF00637	426418.XP_001931044.1	6.5e-151	539.7					fuNOG[21]	03P85@ascNOG,0H3UZ@dotNOG,0PJQJ@fuNOG,13J0C@opiNOG,15E1G@pleNOG,COG2132@NOG,KOG1263@euNOG	NA|NA|NA	Q	Multicopper oxidase
tF00683	4896.SPAC821.09.1	3.8e-07	60.1	FG08757.1	GO:0000003,GO:0000272,GO:0000910,GO:0000920,GO:0001871,GO:0003006,GO:0003674,GO:0003824,GO:0004553,GO:0005488,GO:0005575,GO:0005576,GO:0005618,GO:0005622,GO:0005623,GO:0005975,GO:0005976,GO:0006073,GO:0006074,GO:0006076,GO:0006996,GO:0007010,GO:0007049,GO:0007109,GO:0008150,GO:0008152,GO:0008422,GO:0009056,GO:0009057,GO:0009251,GO:0009277,GO:0009311,GO:0009313,GO:0009653,GO:0009986,GO:0009987,GO:…	K01180		fuNOG[21]	03JI3@ascNOG,0PGKK@fuNOG,12QFX@opiNOG,COG5498@NOG,KOG2254@euNOG	NA|NA|NA	G	Endo-1,3-beta-glucanase
tF00710	861557.XP_003305316.1	6.2e-77	293.1					fuNOG[21]	03QAV@ascNOG,0H6UD@dotNOG,0IVT9@euNOG,0PMAI@fuNOG,0XS8F@NOG,13JK2@opiNOG,15EDR@pleNOG	NA|NA|NA
tF00734	39416.CAZ80568	1.1e-160	572	PHO5	GO:0000322,GO:0000323,GO:0000324,GO:0001403,GO:0002036,GO:0002038,GO:0003674,GO:0003824,GO:0003993,GO:0004721,GO:0004725,GO:0005575,GO:0005576,GO:0005618,GO:0005622,GO:0005623,GO:0005737,GO:0005773,GO:0005783,GO:0005794,GO:0005886,GO:0006464,GO:0006470,GO:0006725,GO:0006766,GO:0006767,GO:0006772,GO:0006790,GO:0006793,GO:0006796,GO:0006807,GO:0006950,GO:0007124,GO:0007154,GO:0008150,GO:0008152,GO:…	K01078	ACP1e,THMDPe,THMPe	fuNOG[21]	03KM9@ascNOG,0PHNG@fuNOG,11FS8@NOG,12R6E@opiNOG,KOG1382@euNOG	NA|NA|NA	S	acid phosphatase
tF00743	5085.CADAFUBP00008530	2.2e-175	620.9	FG01711.1		K01046		fuNOG[21]	03KP1@ascNOG,0M6IF@euroNOG,0MICW@eurotNOG,0PHQB@fuNOG,12SG8@opiNOG,COG2272@NOG,KOG1516@euNOG	NA|NA|NA	T	Carboxylesterase family
tF00773	5022.CBX90312	1.4e-19	104.4					fuNOG[21]	03S4F@ascNOG,0HA7H@dotNOG,0IXWG@euNOG,0PPGJ@fuNOG,1207V@NOG,13R5W@opiNOG,159HQ@pleNOG	NA|NA|NA
tF00791	5057.CADACLAP00004082	4.5e-105	386.7					fuNOG[21]	03J8F@ascNOG,0IJPD@euNOG,0PISU@fuNOG,0XQXY@NOG,13KR5@opiNOG	NA|NA|NA	S	Inherit from NOG: exported protein
tF00794	1047171.EFQ32842	1.8e-118	431.8					fuNOG[21]	04C4J@ascNOG,0H95C@dotNOG,0PIV8@fuNOG,12TR4@opiNOG,COG2124@NOG,KOG0156@euNOG	NA|NA|NA	Q	Cytochrome P450
tF00795	441960.XP_002145721.1	2.1e-118	431.4					fuNOG[21]	03MMZ@ascNOG,0IR8Z@euNOG,0M7ZX@euroNOG,0MRCZ@eurotNOG,0PMQH@fuNOG,13KCN@opiNOG,COG0277@NOG	NA|NA|NA	C	FAD binding domain protein
tF00799	140110.NechaP41810	9.2e-210	735.3	FG03034.1		K00108		fuNOG[21]	03M37@ascNOG,0PI4D@fuNOG,0SNE7@hypNOG,0WY2U@necNOG,12QUV@opiNOG,1A1YG@sordNOG,COG2303@NOG,KOG1238@euNOG	NA|NA|NA	E	GMC oxidoreductase
tF00806	5022.CBX98196	2.5e-131	474.6	FG06053.1		K05906		fuNOG[21]	03J8H@ascNOG,0H4WG@dotNOG,0IE2Q@euNOG,0PGAB@fuNOG,0Y3UN@NOG,12T2K@opiNOG,158M9@pleNOG	NA|NA|NA	O	Prenylcysteine lyase
tF00844	36630.CADNFIAP00004429	2.1e-28	130.6	FG03017.1				fuNOG[21]	03N9P@ascNOG,0IHVS@euNOG,0MCX3@euroNOG,0MPUN@eurotNOG,0PJB2@fuNOG,13M6K@opiNOG,COG2273@NOG	NA|NA|NA	G	Glycosyl hydrolases family 16
tF00845	5022.CBX97978	2.3e-118	431	PGUG_03743	GO:0007275,GO:0008150,GO:0032501,GO:0032502,GO:0043581,GO:0044699,GO:0044707,GO:0044767,GO:0048856	K09523		fuNOG[21]	03JRA@ascNOG,0H656@dotNOG,0PJCZ@fuNOG,12S2K@opiNOG,158ZN@pleNOG,COG0484@NOG,KOG0624@euNOG	NA|NA|NA	O	Tetratricopeptide repeat
tF00849	5022.CBY01948	7.3e-151	538.9					fuNOG[21]	03YP8@ascNOG,0HBI3@dotNOG,0JAK1@euNOG,0PV9R@fuNOG,140FA@opiNOG,15AN1@pleNOG,COG3940@NOG	NA|NA|NA	G	Glycosyl hydrolases family 43
tF00856	1047171.EFQ32096	1.6e-111	407.9	FG04980.1	GO:0000323,GO:0000737,GO:0001558,GO:0002084,GO:0003674,GO:0003824,GO:0005575,GO:0005576,GO:0005622,GO:0005623,GO:0005634,GO:0005737,GO:0005764,GO:0005773,GO:0005783,GO:0005789,GO:0005794,GO:0005829,GO:0006139,GO:0006259,GO:0006308,GO:0006309,GO:0006464,GO:0006629,GO:0006643,GO:0006665,GO:0006725,GO:0006807,GO:0006810,GO:0006873,GO:0006885,GO:0006897,GO:0006898,GO:0006907,GO:0006915,GO:0006921,GO:…	K01074		fuNOG[21]	03QCD@ascNOG,0H6WK@dotNOG,0PMHB@fuNOG,12TE3@opiNOG,COG1075@NOG,KOG2541@euNOG	NA|NA|NA	I, O	Palmitoyl protein thioesterase
tF00860	13684.SNOT_07015	2.8e-164	583.6	PGUG_05660	GO:0000322,GO:0000323,GO:0000324,GO:0003674,GO:0005488,GO:0005575,GO:0005622,GO:0005623,GO:0005737,GO:0005773,GO:0005783,GO:0006082,GO:0006520,GO:0006807,GO:0008150,GO:0008152,GO:0009987,GO:0019627,GO:0019752,GO:0030145,GO:0034641,GO:0043167,GO:0043169,GO:0043226,GO:0043227,GO:0043229,GO:0043231,GO:0043436,GO:0043603,GO:0044237,GO:0044238,GO:0044281,GO:0044424,GO:0044444,GO:0044464,GO:0044710,GO:…	K01480		fuNOG[21]	03M4N@ascNOG,0H433@dotNOG,0PI69@fuNOG,12RTM@opiNOG,15B93@pleNOG,COG0010@NOG,KOG2964@euNOG	NA|NA|NA	E	Arginase family
tF00887	13684.SNOT_02312	1e-11	75.5					fuNOG[21]	041EQ@ascNOG,0H93B@dotNOG,0JKRI@euNOG,0Q008@fuNOG,0Z4TP@NOG,14BRG@opiNOG	NA|NA|NA
tF00894	5061.CADANGAP00000622	2.1e-13	80.9	FG09703.1				fuNOG[21]	03SXN@ascNOG,0IZWM@euNOG,0M9U6@euroNOG,0MP7E@eurotNOG,0PQ8H@fuNOG,12CSU@NOG,13U3C@opiNOG	NA|NA|NA	S	integral membrane protein
tF00952	5062.CADAORAP00002172	0	1112.4					fuNOG[21]	03Q8P@ascNOG,0IK7P@euNOG,0M4Z7@euroNOG,0PKN0@fuNOG,13JV1@opiNOG,COG3537@NOG	NA|NA|NA	G	Alpha-1,2-mannosidase
tF00957	861557.XP_003300454.1	4e-220	769.6					fuNOG[21]	04C4J@ascNOG,0H95C@dotNOG,0PIV8@fuNOG,12TR4@opiNOG,COG2124@NOG,KOG0156@euNOG	NA|NA|NA	Q	Cytochrome P450
tF01046	229533.XP_386263.1	4e-22	111.3	FG06087.1	GO:0007275,GO:0008150,GO:0032501,GO:0032502,GO:0043581,GO:0044699,GO:0044707,GO:0044767,GO:0048856			fuNOG[21]	03T01@ascNOG,0IZC6@euNOG,0PQ56@fuNOG,0SBEK@hypNOG,0X08H@necNOG,11TNH@NOG,13SNJ@opiNOG,19NAZ@sordNOG	NA|NA|NA	S	Chitin binding domain
tF01079	51453.JGI69692	4.8e-47	193.7					fuNOG[21]	04EB2@ascNOG,0J4D0@euNOG,0QEHJ@fuNOG,0SKNX@hypNOG,11XAE@NOG,13XAU@opiNOG,1A4FP@sordNOG	NA|NA|NA
tF01132	40559.EDN33531	1.1e-64	252.3			K01199,K01210		fuNOG[21]	03P4R@ascNOG,0IJD5@euNOG,0PK2A@fuNOG,13HHX@opiNOG,COG5309@NOG	NA|NA|NA	G	Glucan 1,3-beta-glucosidase
tF01135	5061.CADANGAP00013783	3.3e-21	107.1					fuNOG[21]	03VK5@ascNOG,0J4IY@euNOG,0PSZ4@fuNOG,0YUHQ@NOG,13WXX@opiNOG	NA|NA|NA	S	Inherit from fuNOG: Extracellular matrix protein
tF01213	426418.XP_001938287.1	2.7e-283	979.9	KEX2	GO:0000003,GO:0000139,GO:0000746,GO:0000747,GO:0003674,GO:0003824,GO:0004175,GO:0004252,GO:0004857,GO:0004866,GO:0004867,GO:0005575,GO:0005576,GO:0005615,GO:0005622,GO:0005623,GO:0005737,GO:0005768,GO:0005769,GO:0005783,GO:0005788,GO:0005794,GO:0005798,GO:0005802,GO:0005886,GO:0006508,GO:0006950,GO:0006970,GO:0007323,GO:0008150,GO:0008152,GO:0008233,GO:0008236,GO:0009628,GO:0009966,GO:0009986,GO:…	K01341		fuNOG[21]	03I7W@ascNOG,0H362@dotNOG,0PF8E@fuNOG,12PQZ@opiNOG,159KB@pleNOG,COG1404@NOG,COG4935@NOG,KOG3525@euNOG	NA|NA|NA	O	Proprotein convertase P-domain
tF01232	13684.SNOT_14763	5.7e-137	492.7	PGAB	GO:0000272,GO:0003674,GO:0003824,GO:0004553,GO:0004650,GO:0005575,GO:0005576,GO:0005975,GO:0005976,GO:0007124,GO:0008150,GO:0008152,GO:0009056,GO:0009057,GO:0009987,GO:0010393,GO:0016049,GO:0016052,GO:0016787,GO:0016798,GO:0030447,GO:0040007,GO:0043170,GO:0044182,GO:0044238,GO:0044699,GO:0044763,GO:0045488,GO:0045490,GO:0070783,GO:0071704,GO:1901575	K01184,K01213	EPGALURSe	fuNOG[21]	03IPR@ascNOG,0H42T@dotNOG,0IE38@euNOG,0PFRD@fuNOG,12NEQ@opiNOG,15AQ8@pleNOG,COG5434@NOG	NA|NA|NA	G	Glycosyl hydrolases family 28
tF01253	426418.XP_001937817.1	4.4e-58	229.9					fuNOG[21]	03SI6@ascNOG,0H78S@dotNOG,0IXKB@euNOG,0PNR3@fuNOG,11MY3@NOG,13RDU@opiNOG,15BA9@pleNOG	NA|NA|NA	G	Glycosyl hydrolase family 61
tF01255	36630.CADNFIAP00000699	1.1e-301	1041.2	AGDC	GO:0000272,GO:0003674,GO:0003824,GO:0004553,GO:0004558,GO:0005575,GO:0005576,GO:0005975,GO:0005976,GO:0005982,GO:0006073,GO:0008150,GO:0008152,GO:0009056,GO:0009057,GO:0009251,GO:0009987,GO:0015926,GO:0016052,GO:0016787,GO:0016798,GO:0043170,GO:0044042,GO:0044237,GO:0044238,GO:0044260,GO:0044262,GO:0044264,GO:0044275,GO:0044723,GO:0044724,GO:0071704,GO:1901575	K01187		fuNOG[21]	03JH1@ascNOG,0M5X1@euroNOG,0MHZZ@eurotNOG,0PHCX@fuNOG,12Q2U@opiNOG,COG1501@NOG,KOG1065@euNOG	NA|NA|NA	G	alpha-glucosidase
tF01267	336963.XP_002584420.1	4.7e-11	73.9					fuNOG[21]	03W1W@ascNOG,0J84Z@euNOG,0M9HF@euroNOG,0PTII@fuNOG,0ZGVU@NOG,12IJ5@onyNOG,13ZMX@opiNOG	NA|NA|NA
tF01268	246410.XP_001247715.1	5.1e-15	87					fuNOG[21]	03W1W@ascNOG,0J84Z@euNOG,0M9HF@euroNOG,0PTII@fuNOG,0ZGVU@NOG,12IJ5@onyNOG,13ZMX@opiNOG	NA|NA|NA
tF01310	5062.CADAORAP00005037	5.9e-85	319.3	FG06506.1				fuNOG[21]	03SGX@ascNOG,0IX32@euNOG,0M8JD@euroNOG,0PP2H@fuNOG,11MM1@NOG,13R80@opiNOG	NA|NA|NA	S	chitin binding protein
tF01314	500485.XP_002567276.1	1.7e-75	288.1	FG03365.1	GO:0005575,GO:0005576			fuNOG[21]	03IFK@ascNOG,0IGX3@euNOG,0MBIF@euroNOG,0MIAV@eurotNOG,0PFH3@fuNOG,0Z1SH@NOG,13I3K@opiNOG	NA|NA|NA	S	endonuclease exonuclease phosphatase family protein
tF01332	33178.CADATEAP00007283	6.8e-12	75.5					NOG[107]	11RSP@NOG	NA|NA|NA
tF01343	140110.NechaP82632	5.2e-141	506.5	FG08824.1				fuNOG[21]	03MZ9@ascNOG,0IMS6@euNOG,0PJ0S@fuNOG,0SK2T@hypNOG,0WW52@necNOG,13JYJ@opiNOG,19Q58@sordNOG,COG0277@NOG	NA|NA|NA	C	Berberine and berberine like
tF01348	5085.CADAFUBP00001855	2.3e-102	378.3					opiNOG[43]	0IVYR@euNOG,11YS5@NOG,13VPJ@opiNOG	NA|NA|NA
tF01350	13684.SNOT_01153	1e-33	149.1					fuNOG[21]	04CP6@ascNOG,0HA9J@dotNOG,0IHMJ@euNOG,0QCP1@fuNOG,0YAA5@NOG,13A63@opiNOG,15E4P@pleNOG	NA|NA|NA	S	Peroxidase
tF01367	426418.XP_001941812.1	1.8e-134	484.6	NAG2	GO:0007275,GO:0008150,GO:0032501,GO:0032502,GO:0043581,GO:0044699,GO:0044707,GO:0044767,GO:0048856	K12373		fuNOG[21]	03PNF@ascNOG,0H6T9@dotNOG,0PIDG@fuNOG,12QRR@opiNOG,158HR@pleNOG,COG3525@NOG,KOG2499@euNOG	NA|NA|NA	G	beta-hexosaminidase
tF01395	861557.XP_003305106.1	3.8e-285	986.1	HRD3	GO:0000151,GO:0000153,GO:0000835,GO:0000836,GO:0000838,GO:0000839,GO:0005575,GO:0005622,GO:0005623,GO:0005737,GO:0005783,GO:0005788,GO:0005789,GO:0006464,GO:0006508,GO:0006511,GO:0008150,GO:0008152,GO:0009056,GO:0009057,GO:0009987,GO:0010498,GO:0012505,GO:0016020,GO:0016567,GO:0019538,GO:0019941,GO:0030163,GO:0030433,GO:0031090,GO:0031974,GO:0032446,GO:0032991,GO:0034099,GO:0036211,GO:0042175,GO:…	K07126,K14023,K14026		fuNOG[21]	03QDD@ascNOG,0H6AU@dotNOG,0PFCT@fuNOG,12NN4@opiNOG,15B3T@pleNOG,COG0790@NOG,KOG1550@euNOG	NA|NA|NA	O	Sel1 repeat
tF01447	40559.EDN28364	1.1e-84	318.9	FG02202.1	GO:0000272,GO:0003674,GO:0003824,GO:0004553,GO:0005975,GO:0005976,GO:0008150,GO:0008152,GO:0008810,GO:0009056,GO:0009057,GO:0009251,GO:0016052,GO:0016787,GO:0016798,GO:0043170,GO:0044042,GO:0044238,GO:0071704,GO:1901575			fuNOG[21]	03QWV@ascNOG,0IWWC@euNOG,0PNFI@fuNOG,0YBW9@NOG,13QH3@opiNOG	NA|NA|NA	G	endo-glucanase
tF01454	578458.XP_003029971.1	1.3e-183	647.9	FG03402.1		K01078		fuNOG[21]	0PGG2@fuNOG,11FS8@NOG,12RUP@opiNOG,KOG1382@euNOG	NA|NA|NA	S	acid) phosphatase
tF01481	1047171.EFQ36854	2.6e-22	112.1					fuNOG[21]	03SBQ@ascNOG,0H8ZU@dotNOG,0IXMG@euNOG,0PNX0@fuNOG,11KC7@NOG,13SDH@opiNOG	NA|NA|NA	S	Inherit from fuNOG: Secreted protein
tF01514	578455.XP_003651148.1	7.3e-151	539.7					fuNOG[21]	046S8@ascNOG,0CWPR@chaNOG,0Q64D@fuNOG,12Q5N@opiNOG,19UYK@sordNOG,1ADE9@sorNOG,COG2132@NOG,KOG1263@euNOG	NA|NA|NA	Q	Multicopper oxidase
tF01533	5180.EDO02977	9.1e-30	136.7			K01183		fuNOG[21]	03P03@ascNOG,0PJY5@fuNOG,12QHY@opiNOG,COG3325@NOG,KOG2806@euNOG	NA|NA|NA	G	chitinase
tF01560	441960.XP_002148788.1	1.3e-111	408.7					fuNOG[21]	03SFU@ascNOG,0IYC4@euNOG,0MCBX@euroNOG,0MRJK@eurotNOG,0PNT0@fuNOG,0YEP2@NOG,13R0W@opiNOG	NA|NA|NA	S	glucan endo-1,3-alpha-glucosidase agn1 precursor
tF01561	339724.XP_001542739.1	3.7e-82	311.2					fuNOG[21]	03Z59@ascNOG,0JNMY@euNOG,0M83G@euroNOG,0PWNM@fuNOG,118RT@NOG,12IRW@onyNOG,144B0@opiNOG	NA|NA|NA
tF01588	13684.SNOT_02920	5.2e-149	532.7	OCH1	GO:0000009,GO:0000030,GO:0000032,GO:0000136,GO:0000137,GO:0000139,GO:0003674,GO:0003824,GO:0005575,GO:0005622,GO:0005623,GO:0005634,GO:0005737,GO:0005783,GO:0005789,GO:0005794,GO:0005795,GO:0005829,GO:0005975,GO:0005976,GO:0006056,GO:0006057,GO:0006080,GO:0006464,GO:0006486,GO:0006487,GO:0006491,GO:0008150,GO:0008152,GO:0009058,GO:0009059,GO:0009100,GO:0009101,GO:0009311,GO:0009987,GO:0012505,GO:…	K05528,K05534		fuNOG[21]	03J68@ascNOG,0H587@dotNOG,0IHVC@euNOG,0PII4@fuNOG,12QMS@opiNOG,157RG@pleNOG,COG3774@NOG	NA|NA|NA	G	Glycosyltransferase sugar-binding region containing DXD motif
tF01592	861557.XP_003305804.1	1.8e-15	88.6					fuNOG[21]	040AW@ascNOG,0H92D@dotNOG,0J5JQ@euNOG,0PY03@fuNOG,0YSAT@NOG,146CV@opiNOG,15EK1@pleNOG	NA|NA|NA	S	ZnF_C2H2
tF01610	861557.XP_003306271.1	1.4e-57	229.6			K01046		fuNOG[21]	03XDM@ascNOG,0HBIF@dotNOG,0PVAP@fuNOG,12TED@opiNOG,15944@pleNOG,COG2272@NOG,KOG4389@euNOG	NA|NA|NA	T	Carboxylesterase family
tF01644	861557.XP_003299784.1	2.2e-121	441.4	YOS9	GO:0001948,GO:0003674,GO:0005488,GO:0005515,GO:0005575,GO:0005622,GO:0005623,GO:0005737,GO:0005783,GO:0005788,GO:0005789,GO:0006508,GO:0006511,GO:0008150,GO:0008152,GO:0009056,GO:0009057,GO:0009987,GO:0010498,GO:0012505,GO:0016020,GO:0019538,GO:0019941,GO:0030163,GO:0030246,GO:0030433,GO:0031090,GO:0031974,GO:0032991,GO:0034099,GO:0042175,GO:0043161,GO:0043170,GO:0043226,GO:0043227,GO:0043229,GO:…	K10088		fuNOG[21]	03NJJ@ascNOG,0H93P@dotNOG,0PK6W@fuNOG,0XR8A@NOG,12N9Q@opiNOG,15DMS@pleNOG,KOG3394@euNOG	NA|NA|NA	O	Glucosidase II beta subunit-like protein
tF01691	861557.XP_003304631.1	2.2e-22	111.7					fuNOG[21]	041W7@ascNOG,0JMS6@euNOG,0PZSZ@fuNOG,0Z6MB@NOG,14AVC@opiNOG	NA|NA|NA
tF01699	13684.SNOT_06409	6.6e-107	392.9	CBHC	GO:0000272,GO:0003674,GO:0003824,GO:0004553,GO:0005575,GO:0005576,GO:0005975,GO:0005976,GO:0008150,GO:0008152,GO:0009056,GO:0009057,GO:0009251,GO:0016052,GO:0016162,GO:0016787,GO:0016798,GO:0043170,GO:0044042,GO:0044238,GO:0071704,GO:1901575	K19668		fuNOG[21]	03JWB@ascNOG,0IEPE@euNOG,0PGYJ@fuNOG,13KE2@opiNOG,COG5297@NOG	NA|NA|NA	G	The biological conversion of cellulose to glucose generally requires three types of hydrolytic enzymes (1) Endoglucanases which cut internal beta-1,4-glucosidic bonds
tF01700	426418.XP_001932168.1	3.8e-51	207.2					fuNOG[21]	04D8K@ascNOG,0HBJA@dotNOG,0IMQC@euNOG,0QD91@fuNOG,10ZJF@NOG,13AZB@opiNOG,15F7J@pleNOG	NA|NA|NA
tF01738	5061.CADANGAP00000030	3.5e-179	633.6	ABFA	GO:0000272,GO:0003674,GO:0003824,GO:0004553,GO:0005575,GO:0005576,GO:0005975,GO:0005976,GO:0005996,GO:0008150,GO:0008152,GO:0009056,GO:0009057,GO:0009987,GO:0010383,GO:0010410,GO:0016052,GO:0016787,GO:0016798,GO:0019321,GO:0019566,GO:0043170,GO:0044036,GO:0044237,GO:0044238,GO:0044260,GO:0044699,GO:0044723,GO:0044763,GO:0046373,GO:0046556,GO:0071554,GO:0071704,GO:0071840,GO:1901575,GO:2000895	K01209		fuNOG[21]	03KMN@ascNOG,0IK9R@euNOG,0M419@euroNOG,0PHNV@fuNOG,12QBA@opiNOG,COG3534@NOG	NA|NA|NA	G	Alpha-N-arabinofuranosidase involved in the degradation of arabinoxylan, a major component of plant hemicellulose. Acts only on small linear 1,5-alpha-linked L-arabinofuranosyl oligosaccharides (By similarity)
tF01786	162425.CADANIAP00001944	2.4e-19	100.5					fuNOG[21]	043QS@ascNOG,0IKWI@euNOG,0MD61@euroNOG,0MMQ7@eurotNOG,0PK7H@fuNOG,0XPUV@NOG,138GP@opiNOG	NA|NA|NA	S	Arylsulfotransferase (ASST)
tF01824	559298.XP_002627639.1	4e-30	137.5	FG00935.1				fuNOG[21]	03TMH@ascNOG,0J0A2@euNOG,0M8FY@euroNOG,0PQQR@fuNOG,0XVMK@NOG,12HWG@onyNOG,13U8D@opiNOG	NA|NA|NA
tF01825	5022.CBX93548	2.2e-74	284.3					fuNOG[21]	03SDA@ascNOG,0H7UW@dotNOG,0IYEY@euNOG,0PPAG@fuNOG,11PKN@NOG,13RPE@opiNOG,15A15@pleNOG	NA|NA|NA	S	Inherit from ascNOG: Conserved hypothetical protein
tF01828	526221.XP_003001151.1	4.5e-88	330.9					fuNOG[21]	03X8R@ascNOG,0JAET@euNOG,0PUK8@fuNOG,0YD98@NOG,142R7@opiNOG,19JN1@sordNOG	NA|NA|NA
tF01839	5507.FOXG_10384P0	1.2e-42	177.9	FG02685.1				fuNOG[21]	03SN5@ascNOG,0IZ74@euNOG,0PQ78@fuNOG,0SE5N@hypNOG,11PAQ@NOG,13SH2@opiNOG,1A6HN@sordNOG	NA|NA|NA
tF01859	1047171.EFQ31645	2.7e-137	493.8	FG01829.1		K01785		fuNOG[21]	03PET@ascNOG,0H5Z9@dotNOG,0PJ9W@fuNOG,12QR4@opiNOG,COG2017@NOG,KOG1604@euNOG	NA|NA|NA	G	Aldose 1-epimerase
tF01862	13684.SNOT_02220	7.7e-117	426			K15532		fuNOG[21]	03KAR@ascNOG,0H5ME@dotNOG,0IJEV@euNOG,0PK1H@fuNOG,13IEB@opiNOG,15DCB@pleNOG,COG4225@NOG	NA|NA|NA	S	Glycosyl Hydrolase Family 88
tF01905	426418.XP_001941434.1	3.4e-247	859.8	FG06174.1	GO:0003674,GO:0003756,GO:0003824,GO:0005575,GO:0005622,GO:0005623,GO:0005737,GO:0005783,GO:0005789,GO:0005794,GO:0006457,GO:0006621,GO:0008104,GO:0008150,GO:0008152,GO:0009987,GO:0012505,GO:0016020,GO:0016853,GO:0016860,GO:0016862,GO:0016864,GO:0019538,GO:0031090,GO:0032507,GO:0033036,GO:0033365,GO:0034613,GO:0034975,GO:0035437,GO:0042175,GO:0043170,GO:0043226,GO:0043227,GO:0043229,GO:0043231,GO:…	K13984,K13996		fuNOG[21]	03NU2@ascNOG,0H6R6@dotNOG,0PJ6R@fuNOG,13EIA@opiNOG,15AC8@pleNOG,COG0526@NOG,KOG0191@euNOG	NA|NA|NA	O	Thioredoxin
tF01911	663331.XP_003014338.1	4.3e-125	453.4	FG08673.1	GO:0000922,GO:0005575,GO:0005622,GO:0005623,GO:0005634,GO:0005737,GO:0005815,GO:0005816,GO:0005819,GO:0005829,GO:0005856,GO:0015630,GO:0032153,GO:0032991,GO:0043226,GO:0043227,GO:0043228,GO:0043229,GO:0043231,GO:0043232,GO:0043234,GO:0044422,GO:0044424,GO:0044430,GO:0044444,GO:0044446,GO:0044464,GO:0044732,GO:0051286,GO:0060187,GO:0072686	K07126		fuNOG[21]	0314G@arthNOG,03KNX@ascNOG,0M7FN@euroNOG,0PHQ7@fuNOG,12DI9@onyNOG,12TKX@opiNOG,COG0790@NOG,KOG1550@euNOG	NA|NA|NA	M, O, T	SEL1
tF01957	441959.XP_002479041.1	7.7e-35	152.9					fuNOG[21]	03RPX@ascNOG,0IYAI@euNOG,0MEUZ@euroNOG,0MQ1R@eurotNOG,0PNSB@fuNOG,11QIQ@NOG,13SEZ@opiNOG	NA|NA|NA	S	Peptidase A4 family
tF02010	426418.XP_001941052.1	1.6e-65	255.4					fuNOG[21]	03P2X@ascNOG,0H3DB@dotNOG,0IJ75@euNOG,0PIHC@fuNOG,0XS3C@NOG,13K13@opiNOG,1598J@pleNOG	NA|NA|NA	S	Inherit from ascNOG: BNR Asp-box repeat
tF02056	140110.NechaP76383	8e-48	197.2	FG05067.1				fuNOG[21]	03JNS@ascNOG,0IEJF@euNOG,0PGRF@fuNOG,0SGPG@hypNOG,0WYDG@necNOG,12PAD@opiNOG,19JR8@sordNOG,COG2706@NOG	NA|NA|NA	G	Pfam:Muc_lac_enz
tF02066	5022.CBX92598	6.1e-143	513.1	FGSG_09811				fuNOG[21]	03MGX@ascNOG,0H4CY@dotNOG,0IEZ3@euNOG,0PHK2@fuNOG,0XRFH@NOG,13KQT@opiNOG,159NU@pleNOG	NA|NA|NA	S	Inherit from ascNOG: SH3 domain-containing protein
tF02131	5022.CBY01944	1.6e-180	637.5	PEP2	GO:0000322,GO:0000323,GO:0000324,GO:0000328,GO:0003674,GO:0003824,GO:0005575,GO:0005576,GO:0005622,GO:0005623,GO:0005737,GO:0005739,GO:0005773,GO:0005775,GO:0006508,GO:0006914,GO:0006950,GO:0007154,GO:0008150,GO:0008152,GO:0008233,GO:0009056,GO:0009057,GO:0009267,GO:0009605,GO:0009987,GO:0009991,GO:0010324,GO:0016043,GO:0016044,GO:0016237,GO:0016787,GO:0019538,GO:0030163,GO:0031667,GO:0031668,GO:…	K01381		fuNOG[21]	03IA7@ascNOG,0H3BS@dotNOG,0PFB5@fuNOG,0XNV7@NOG,12RM2@opiNOG,157B2@pleNOG,KOG1339@euNOG	NA|NA|NA	O	Eukaryotic aspartyl protease
tF02132	5022.CBX91234	4.3e-149	533.9	FG00294.1				fuNOG[21]	03KZ0@ascNOG,0H4T9@dotNOG,0IFEI@euNOG,0PG4P@fuNOG,0XPIN@NOG,12QQ7@opiNOG,15B5C@pleNOG	NA|NA|NA	G	Glycosyl hydrolase family 76
tF02158	5061.CADANGAP00012600	2.5e-217	760					fuNOG[21]	044H4@ascNOG,0IGI7@euNOG,0MB48@euroNOG,0MSCH@eurotNOG,0Q1PH@fuNOG,14HMV@opiNOG,COG3511@NOG	NA|NA|NA	I	Phosphoesterase family
tF02178	13684.SNOT_14907	8.3e-173	612.1	WBP1	GO:0003674,GO:0003824,GO:0004576,GO:0004579,GO:0005575,GO:0005622,GO:0005623,GO:0005634,GO:0005635,GO:0005737,GO:0005783,GO:0005789,GO:0005975,GO:0006464,GO:0006486,GO:0006487,GO:0007049,GO:0008150,GO:0008152,GO:0008250,GO:0009058,GO:0009059,GO:0009100,GO:0009101,GO:0009987,GO:0012505,GO:0016020,GO:0016740,GO:0016757,GO:0016758,GO:0019538,GO:0031090,GO:0031967,GO:0031975,GO:0032991,GO:0034645,GO:…	K12670		fuNOG[21]	03MM3@ascNOG,0H5FZ@dotNOG,0PIP1@fuNOG,0XSF3@NOG,12PKB@opiNOG,157YG@pleNOG,KOG2754@euNOG	NA|NA|NA	O	Oligosaccharyltransferase 48 kDa subunit beta
tF02188	140110.NechaP122895	3.8e-46	190.7			K18576		fuNOG[21]	03N8K@ascNOG,0IED9@euNOG,0PMUC@fuNOG,10PX7@NOG,13PJF@opiNOG	NA|NA|NA	G	Glycosyl hydrolase family 12
tF02190	5786.XP_003288077.1	7.6e-18	97.1	CTSD	GO:0000003,GO:0000045,GO:0000323,GO:0001654,GO:0001655,GO:0001822,GO:0001823,GO:0001894,GO:0001990,GO:0001991,GO:0002002,GO:0002003,GO:0002016,GO:0002018,GO:0002165,GO:0002237,GO:0002376,GO:0002478,GO:0002495,GO:0002504,GO:0003006,GO:0003008,GO:0003013,GO:0003014,GO:0003044,GO:0003071,GO:0003073,GO:0003081,GO:0003406,GO:0003674,GO:0003824,GO:0004175,GO:0004190,GO:0005102,GO:0005159,GO:0005488,GO:…	K01379,K01380,K08245,K08565		euNOG[57]	0XNV7@NOG,KOG1339@euNOG	NA|NA|NA	O	aspartic
tF02194	5062.CADAORAP00010011	6.4e-130	469.5	FG10411.1	GO:0000272,GO:0003674,GO:0003824,GO:0004553,GO:0005575,GO:0005576,GO:0005615,GO:0005975,GO:0005976,GO:0008150,GO:0008152,GO:0009056,GO:0009057,GO:0009251,GO:0016052,GO:0016162,GO:0016787,GO:0016798,GO:0043170,GO:0044042,GO:0044238,GO:0044421,GO:0071704,GO:1901575	K01181		fuNOG[21]	03PE8@ascNOG,0IERE@euNOG,0PKIH@fuNOG,13HD6@opiNOG,COG3693@NOG	NA|NA|NA	G	Endo-1,4-beta-xylanase
tF02204	5059.CADAFLAP00000566	6.6e-56	223.4	EGLD	GO:0005575,GO:0005576	K19356		fuNOG[21]	03TRP@ascNOG,0JBJX@euNOG,0PWTS@fuNOG,0YI33@NOG,13VSE@opiNOG	NA|NA|NA	G	Has endoglucanase activity on substrates containing beta-1,4 glycosidic bonds, like in carboxymethylcellulose (CMC), hydroxyethylcellulose (HEC) and beta-glucan. Involved in the degradation of complex natural cellulosic substrates (By similarity)
tF02298	426418.XP_001938440.1	0	1417.1	VPS10	GO:0003674,GO:0005048,GO:0005488,GO:0005575,GO:0005622,GO:0005623,GO:0005737,GO:0005768,GO:0005770,GO:0005794,GO:0005802,GO:0006605,GO:0006623,GO:0006810,GO:0006886,GO:0006892,GO:0006896,GO:0007034,GO:0008104,GO:0008150,GO:0009987,GO:0010008,GO:0015031,GO:0016020,GO:0016192,GO:0016482,GO:0031090,GO:0031902,GO:0032588,GO:0033036,GO:0033218,GO:0033365,GO:0034613,GO:0042277,GO:0043226,GO:0043227,GO:…			fuNOG[21]	03MT5@ascNOG,0H6G9@dotNOG,0PFJT@fuNOG,0Y3W5@NOG,12SMY@opiNOG,1597A@pleNOG,KOG3511@euNOG	NA|NA|NA	U	Functions as a sorting receptor in the Golgi compartment required for the intracellular sorting and delivery of soluble vacuolar proteins, like carboxypeptidase Y (CPY) and proteinase A. Executes multiple rounds of sorting by cycling between the late Golgi and a prevacuolar endosome-like compartment (By similarity)
tF02311	13684.SNOT_05144	4.8e-232	809.3	KEX1	GO:0000322,GO:0000323,GO:0000324,GO:0003674,GO:0003824,GO:0004180,GO:0004185,GO:0005575,GO:0005622,GO:0005623,GO:0005737,GO:0005773,GO:0005774,GO:0005802,GO:0006915,GO:0008150,GO:0008152,GO:0008219,GO:0008233,GO:0008236,GO:0008238,GO:0009056,GO:0009057,GO:0009987,GO:0012501,GO:0016020,GO:0016265,GO:0016787,GO:0017171,GO:0019538,GO:0030163,GO:0031090,GO:0032588,GO:0043170,GO:0043226,GO:0043227,GO:…	K01288		fuNOG[21]	03M8Q@ascNOG,0H4IM@dotNOG,0PGB2@fuNOG,12NYT@opiNOG,15AZX@pleNOG,COG2939@NOG,KOG1282@euNOG	NA|NA|NA	O	Protease with a carboxypeptidase B-like function involved in the C-terminal processing of the lysine and arginine residues from protein precursors. Promotes cell fusion and is involved in the programmed cell death (By similarity)
tF02315	36630.CADNFIAP00009755	3.3e-74	283.5	ERP1	GO:0000139,GO:0005575,GO:0005622,GO:0005623,GO:0005737,GO:0005739,GO:0005783,GO:0005789,GO:0005794,GO:0006810,GO:0006888,GO:0008150,GO:0009987,GO:0012505,GO:0016020,GO:0016021,GO:0016023,GO:0016192,GO:0016482,GO:0030133,GO:0030134,GO:0030135,GO:0031090,GO:0031224,GO:0031410,GO:0031982,GO:0031988,GO:0042175,GO:0043226,GO:0043227,GO:0043229,GO:0043231,GO:0044422,GO:0044424,GO:0044425,GO:0044431,GO:…			fuNOG[21]	03PTP@ascNOG,0M5HU@euroNOG,0MKB5@eurotNOG,0PKS7@fuNOG,0XPUW@NOG,12QCY@opiNOG,KOG1690@euNOG	NA|NA|NA	U	Endosomal cargo receptor (Erp5)
tF02334	148304.MAPG_00862T0	2.8e-254	883.6					fuNOG[21]	03NWG@ascNOG,0IIDF@euNOG,0PK45@fuNOG,0U7C2@magNOG,134J0@opiNOG,1A1DK@sordNOG,COG0726@NOG	NA|NA|NA	G	Polysaccharide deacetylase
tF02343	5085.CADAFUBP00005119	5.7e-240	835.5		GO:0000041,GO:0003674,GO:0003824,GO:0004322,GO:0005575,GO:0005622,GO:0005623,GO:0005737,GO:0005783,GO:0005886,GO:0006810,GO:0006811,GO:0006812,GO:0006826,GO:0006873,GO:0006875,GO:0006879,GO:0008150,GO:0008152,GO:0009987,GO:0015684,GO:0016020,GO:0016491,GO:0016722,GO:0016724,GO:0019725,GO:0030001,GO:0030003,GO:0033212,GO:0033215,GO:0034220,GO:0034755,GO:0042592,GO:0043226,GO:0043227,GO:0043229,GO:…	K19791		euNOG[57]	COG2132@NOG,KOG1263@euNOG	NA|NA|NA	Q	Multicopper oxidase
tF02534	426418.XP_001940082.1	1.8e-239	833.9					fuNOG[21]	03IZT@ascNOG,0H3T8@dotNOG,0PJ5E@fuNOG,13JPN@opiNOG,COG2303@NOG,KOG1238@euNOG	NA|NA|NA	E	GMC oxidoreductase
tF02535	40559.EDN27499	1.9e-135	488	PHYA	GO:0005575,GO:0005576	K01083		fuNOG[21]	03J96@ascNOG,0PJ9P@fuNOG,11FS8@NOG,12PMG@opiNOG,KOG1382@euNOG	NA|NA|NA	S	3-phytase A
tF02546	36630.CADNFIAP00007810	1.6e-276	957.2			K01205		fuNOG[21]	03MDY@ascNOG,0M4P1@euroNOG,0MMBG@eurotNOG,0PIFY@fuNOG,0XNMK@NOG,12TZY@opiNOG,KOG2233@euNOG	NA|NA|NA	U	Alpha-N-acetylglucosaminidase (NAGLU) tim-barrel domain
tF02551	40559.EDN19880	4.1e-92	343.6					fuNOG[21]	03P6X@ascNOG,0IIRU@euNOG,0PK1Z@fuNOG,11FI3@NOG,13ABB@opiNOG	NA|NA|NA	G	Glycosyl hydrolases family 16
tF02557	4113.PGSC0003DMT400026515	1.3e-08	67.8		GO:0003674,GO:0003824,GO:0004175,GO:0004197,GO:0008150,GO:0008152,GO:0008233,GO:0008234,GO:0016787,GO:0070011	K01365,K01368,K16290,K16292		euNOG[57]	COG4870@NOG,KOG1543@euNOG	NA|NA|NA	O	cathepsin
tF02606	13684.SNOT_13812	1.9e-199	700.7	FG06612.1				fuNOG[21]	03NC9@ascNOG,0H4AK@dotNOG,0IFDS@euNOG,0PKN9@fuNOG,13HDG@opiNOG,15E7G@pleNOG,COG2140@NOG	NA|NA|NA	G	Cupin_1
tF02611	1047171.EFQ35170	4.2e-46	190.7	FG03695.1				fuNOG[21]	03RJ1@ascNOG,0H72T@dotNOG,0IWNJ@euNOG,0PMY2@fuNOG,121KN@NOG,13QCD@opiNOG	NA|NA|NA	S	Glycosyl hydrolase family 61
tF02694	5022.CBX98301	0	1120.9					fuNOG[21]	04CAR@ascNOG,0HB4N@dotNOG,0IJ9H@euNOG,0PJNE@fuNOG,12T4S@opiNOG,15CN8@pleNOG,COG3537@NOG	NA|NA|NA	G	Glycosyl hydrolase family 92
tF02711	1047171.EFQ25160	7.6e-33	146					fuNOG[21]	03TWZ@ascNOG,0H7MS@dotNOG,0J24E@euNOG,0PR26@fuNOG,121FN@NOG,13VPF@opiNOG	NA|NA|NA
tF02733	426418.XP_001931574.1	3.1e-42	177.9	FG10922.1	GO:0005575,GO:0005618,GO:0005623,GO:0030312,GO:0031160,GO:0044464,GO:0071944			fuNOG[21]	03RA9@ascNOG,0H4DQ@dotNOG,0IWZW@euNOG,0PN6V@fuNOG,13Q5T@opiNOG,15APZ@pleNOG,COG4305@NOG	NA|NA|NA	G	Rare lipoprotein A (RlpA)-like double-psi beta-barrel
tF02833	5059.CADAFLAP00010335	3.1e-89	334.3	PGUG_00089	GO:0000139,GO:0000322,GO:0000323,GO:0000324,GO:0000329,GO:0001948,GO:0003674,GO:0005488,GO:0005515,GO:0005575,GO:0005622,GO:0005623,GO:0005737,GO:0005773,GO:0005774,GO:0005783,GO:0005789,GO:0005794,GO:0006810,GO:0006886,GO:0006888,GO:0008104,GO:0008150,GO:0009987,GO:0012505,GO:0015031,GO:0016020,GO:0016021,GO:0016023,GO:0016192,GO:0016482,GO:0030133,GO:0030134,GO:0030135,GO:0030173,GO:0030176,GO:…	K10080		fuNOG[21]	03MCB@ascNOG,0IKBW@euNOG,0M4FN@euroNOG,0PIPQ@fuNOG,11FM6@NOG,13M8E@opiNOG	NA|NA|NA	U	Lectin family integral membrane protein
tF02902	13684.SNOT_09192	2.1e-172	611.7	FG02611.1	GO:0005575,GO:0005622,GO:0005623,GO:0005737,GO:0005783,GO:0005789,GO:0006457,GO:0008150,GO:0008152,GO:0009987,GO:0012505,GO:0016020,GO:0016021,GO:0019538,GO:0030176,GO:0031090,GO:0031224,GO:0031227,GO:0031300,GO:0031301,GO:0034975,GO:0042175,GO:0043170,GO:0043226,GO:0043227,GO:0043229,GO:0043231,GO:0044237,GO:0044238,GO:0044260,GO:0044267,GO:0044422,GO:0044424,GO:0044425,GO:0044432,GO:0044444,GO:…			fuNOG[21]	03M4J@ascNOG,0H6UA@dotNOG,0PJQE@fuNOG,116S0@NOG,12SYH@opiNOG,15AD4@pleNOG,KOG1396@euNOG	NA|NA|NA	S	Sad1 / UNC-like C-terminal
tF02926	441959.XP_002481534.1	1.2e-28	132.9	FG05656.1		K11244		fuNOG[21]	03SRV@ascNOG,0M8CU@euroNOG,0MP4E@eurotNOG,0PPTS@fuNOG,11FP9@NOG,13SKN@opiNOG,KOG4157@euNOG	NA|NA|NA	G, O	ER membrane protein Wsc4
tF02930	162425.CADANIAP00001944	6.8e-105	386.3					fuNOG[21]	043QS@ascNOG,0IKWI@euNOG,0MD61@euroNOG,0MMQ7@eurotNOG,0PK7H@fuNOG,0XPUV@NOG,138GP@opiNOG	NA|NA|NA	S	Arylsulfotransferase (ASST)
tF02946	5022.CBX91379	4.7e-106	390.6					fuNOG[21]	03J05@ascNOG,0HAPA@dotNOG,0PG2D@fuNOG,0XSGG@NOG,12RAK@opiNOG,15ABZ@pleNOG,KOG2182@euNOG	NA|NA|NA	O	Serine carboxypeptidase S28
tF02950	40559.EDN32735	5.5e-167	594.3	FG03439.1		K11517		fuNOG[21]	03NHM@ascNOG,0PG98@fuNOG,1379H@opiNOG,COG1304@NOG,KOG0538@euNOG	NA|NA|NA	C	Dehydrogenase
tF03028	526221.XP_003004437.1	5.1e-79	299.3	FG06993.1	GO:0005575,GO:0005576			fuNOG[21]	03IPP@ascNOG,0IEDU@euNOG,0PFRC@fuNOG,0XS2C@NOG,13IQD@opiNOG	NA|NA|NA	S	Secreted protein
tF03073	441959.XP_002479041.1	1.5e-68	265					fuNOG[21]	03RPX@ascNOG,0IYAI@euNOG,0MEUZ@euroNOG,0MQ1R@eurotNOG,0PNSB@fuNOG,11QIQ@NOG,13SEZ@opiNOG	NA|NA|NA	S	Peptidase A4 family
tF03103	861557.XP_003302463.1	6.9e-34	150.2					fuNOG[21]	03T9M@ascNOG,0H859@dotNOG,0IZ1N@euNOG,0PPWM@fuNOG,11Z6B@NOG,13TEN@opiNOG,15BYF@pleNOG	NA|NA|NA	S	Inherit from ascNOG: extracellular serine-rich protein
tF03182	426418.XP_001931072.1	0	1217.6	LACA	GO:0003674,GO:0003824,GO:0004553,GO:0004565,GO:0005575,GO:0005576,GO:0005975,GO:0008150,GO:0008152,GO:0015925,GO:0016787,GO:0016798,GO:0044238,GO:0071704			fuNOG[21]	03M3P@ascNOG,0H69V@dotNOG,0PGTY@fuNOG,12QYB@opiNOG,159FZ@pleNOG,COG1874@NOG,KOG0496@euNOG	NA|NA|NA	G	beta-galactosidase
tF03248	441959.XP_002487406.1	1.5e-39	169.1	FG07207.1				fuNOG[21]	03R4U@ascNOG,0IWIH@euNOG,0M5JB@euroNOG,0MPV1@eurotNOG,0PN43@fuNOG,10WB0@NOG,13Q4P@opiNOG	NA|NA|NA	G	Glycosyl hydrolases family 43
tF03251	5059.CADAFLAP00005364	5.3e-245	852.4	FG10677.1	GO:0003674,GO:0003824,GO:0006464,GO:0008131,GO:0008150,GO:0008152,GO:0009987,GO:0010035,GO:0016491,GO:0016638,GO:0016641,GO:0018057,GO:0018149,GO:0018158,GO:0018193,GO:0018205,GO:0019538,GO:0036211,GO:0042221,GO:0043170,GO:0043412,GO:0044237,GO:0044238,GO:0044260,GO:0044267,GO:0044699,GO:0044710,GO:0044763,GO:0050896,GO:0051716,GO:0052597,GO:0055114,GO:0070887,GO:0071241,GO:0071704	K00276		fuNOG[21]	03IN7@ascNOG,0PFPW@fuNOG,13HVT@opiNOG,COG3733@NOG,KOG1186@euNOG	NA|NA|NA	Q	amine oxidase
tF03292	40559.EDN31422	1.1e-156	558.9		GO:0005575,GO:0005576			fuNOG[21]	03P85@ascNOG,0PJQJ@fuNOG,13J0C@opiNOG,COG2132@NOG,KOG1263@euNOG	NA|NA|NA	Q	Multicopper oxidase
tF03296	284593.XP_449771.1	1.1e-30	139.4	CHT1	GO:0000272,GO:0000322,GO:0000323,GO:0000324,GO:0000910,GO:0000920,GO:0003674,GO:0003824,GO:0004553,GO:0004568,GO:0005575,GO:0005576,GO:0005618,GO:0005622,GO:0005623,GO:0005634,GO:0005635,GO:0005737,GO:0005773,GO:0005783,GO:0005886,GO:0005933,GO:0005935,GO:0005975,GO:0005976,GO:0006022,GO:0006026,GO:0006030,GO:0006032,GO:0006037,GO:0006039,GO:0006040,GO:0006807,GO:0007049,GO:0007109,GO:0008150,GO:…	K01183		fuNOG[21]	03MQB@ascNOG,0PIRU@fuNOG,11GPA@NOG,12T4G@opiNOG,1983I@saccNOG,19EH0@sacNOG,KOG4701@euNOG	NA|NA|NA	G	Inherit from saccNOG: chitinase
tF03320	5061.CADANGAP00004583	2.3e-105	387.5		GO:0000272,GO:0003674,GO:0003824,GO:0005575,GO:0005576,GO:0005975,GO:0005976,GO:0008150,GO:0008152,GO:0009056,GO:0009057,GO:0010393,GO:0016052,GO:0016787,GO:0016788,GO:0030599,GO:0043170,GO:0044238,GO:0045488,GO:0045490,GO:0052689,GO:0071704,GO:1901575	K01051		fuNOG[21]	03JWR@ascNOG,0IK29@euNOG,0MBGZ@euroNOG,0MN1A@eurotNOG,0PHJI@fuNOG,13NP3@opiNOG,COG4677@NOG	NA|NA|NA	G	Involved in maceration and soft-rotting of plant tissue
tF03321	5061.CADANGAP00004584	2.2e-150	537.3	XGHA	GO:0005575,GO:0005576	K01213		fuNOG[21]	03QC4@ascNOG,0IQ3B@euNOG,0PKB6@fuNOG,13K8G@opiNOG,COG5434@NOG	NA|NA|NA	G	Pectinolytic enzyme involved in the degradation of xylogalacturonan (xga), a galacturonan backbone heavily substituted with xylose, and which is one important component of the hairy regions of pectin. Activity requires a galacturonic acid backbone substituted with xylose (By similarity)
tF03323	426418.XP_001937246.1	1.6e-10	70.5	FG02110.1				fuNOG[21]	03VE9@ascNOG,0H8VG@dotNOG,0J2DC@euNOG,0PSWX@fuNOG,126WT@NOG,13W85@opiNOG,15CC5@pleNOG	NA|NA|NA
tF03330	5061.CADANGAP00004004	7.7e-87	326.6					fuNOG[21]	03T9Q@ascNOG,0IYG8@euNOG,0MCKI@euroNOG,0MS2S@eurotNOG,0PQ3Z@fuNOG,0YAZ8@NOG,13SPB@opiNOG	NA|NA|NA	S	Ubiquitin 3 binding protein But2 C-terminal domain
tF03331	140110.NechaP44782	4.7e-19	101.7					fuNOG[21]	04BH7@ascNOG,0IF33@euNOG,0Q9A0@fuNOG,0SHTP@hypNOG,13NG8@opiNOG,1A2U6@sordNOG,COG1680@NOG	NA|NA|NA	V	Beta-lactamase
tF03383	578455.XP_003657651.1	9.5e-18	94.7	FG10735.1				fuNOG[21]	03W08@ascNOG,0CVD7@chaNOG,0J685@euNOG,0PTP4@fuNOG,0Y566@NOG,13YXE@opiNOG,19TFZ@sordNOG,1AC8Q@sorNOG	NA|NA|NA
tF03402	5022.CBX95666	4.2e-100	370.9			K01166		fuNOG[21]	03PQ1@ascNOG,0H6QN@dotNOG,0PHG5@fuNOG,11M7G@NOG,13KET@opiNOG,159I1@pleNOG,KOG1642@euNOG	NA|NA|NA	A	Ribonuclease T2 family
tF03418	5022.CBX95183	1.6e-186	657.9	FG01486.1		K01626		fuNOG[21]	03IJW@ascNOG,0H4XF@dotNOG,0IGEI@euNOG,0PIHP@fuNOG,12SCI@opiNOG,15B4P@pleNOG,COG3200@NOG	NA|NA|NA	E	Class-II DAHP synthetase family
tF03439	5180.EDN97086	1.4e-53	215.7					fuNOG[21]	03P9B@ascNOG,0IJ4I@euNOG,0PMB9@fuNOG,11KFS@NOG,13I5N@opiNOG	NA|NA|NA	S	Conserved hypothetical protein
tF03462	500485.XP_002565451.1	1.1e-201	708.4	BGLG	GO:0005575,GO:0005576	K05349		fuNOG[21]	03KBT@ascNOG,0IF0P@euNOG,0MDEV@euroNOG,0MMZ0@eurotNOG,0PHDM@fuNOG,13F94@opiNOG,COG1472@NOG	NA|NA|NA	G	Beta-glucosidases are one of a number of cellulolytic enzymes involved in the degradation of cellulosic biomass. Catalyzes the last step releasing glucose from the inhibitory cellobiose (By similarity)
tF03470	5059.CADAFLAP00003259	2.4e-40	171.8					opiNOG[43]	0IJ4Y@euNOG,13ZX9@opiNOG,COG0496@NOG	NA|NA|NA	F	Inherit from euNOG: 5'-nucleotidase
tF03482	861557.XP_003303045.1	6.3e-112	409.1	GPI12	GO:0000225,GO:0003674,GO:0003824,GO:0005575,GO:0005622,GO:0005623,GO:0005737,GO:0005783,GO:0005789,GO:0006464,GO:0006497,GO:0006505,GO:0006506,GO:0006629,GO:0006643,GO:0006644,GO:0006650,GO:0006661,GO:0006664,GO:0006793,GO:0006796,GO:0008150,GO:0008152,GO:0008610,GO:0008654,GO:0009058,GO:0009059,GO:0009247,GO:0009987,GO:0012505,GO:0016020,GO:0016021,GO:0016787,GO:0016810,GO:0016811,GO:0019213,GO:…	K03434		fuNOG[21]	03NUM@ascNOG,0H6PZ@dotNOG,0PF9B@fuNOG,13RIT@opiNOG,15AUB@pleNOG,COG2120@NOG,KOG3332@euNOG	NA|NA|NA	M	GlcNAc-PI de-N-acetylase
tF03484	222929.XP_003067872.1	7.4e-306	1055.4	FG11097.1				fuNOG[21]	03MJX@ascNOG,0M3Z1@euroNOG,0PF8B@fuNOG,0XSD2@NOG,12EKX@onyNOG,13K5E@opiNOG,KOG4157@euNOG	NA|NA|NA	G, O	Domain of unknown function (DUF1929)
tF03534	861557.XP_003300158.1	0	1495.7	FG05973.1	GO:0003674,GO:0003824,GO:0004553,GO:0004558,GO:0005575,GO:0005622,GO:0005623,GO:0005737,GO:0005739,GO:0005783,GO:0005788,GO:0005975,GO:0006950,GO:0007275,GO:0008150,GO:0008152,GO:0009272,GO:0009311,GO:0009636,GO:0009987,GO:0010035,GO:0010038,GO:0015926,GO:0016787,GO:0016798,GO:0017177,GO:0031974,GO:0032501,GO:0032502,GO:0032991,GO:0033919,GO:0042221,GO:0042546,GO:0043226,GO:0043227,GO:0043229,GO:…	K05546		fuNOG[21]	03MUK@ascNOG,0H3B5@dotNOG,0PH3V@fuNOG,12PAU@opiNOG,15A3K@pleNOG,COG1501@NOG,KOG1066@euNOG	NA|NA|NA	G	Glycosyl hydrolases family 31
tF03559	36630.CADNFIAP00009035	5.8e-178	629.4	FG03601.1	GO:0003674,GO:0003824,GO:0004091,GO:0008150,GO:0008152,GO:0016787,GO:0016788,GO:0052689			fuNOG[21]	03IH9@ascNOG,0M4SH@euroNOG,0MIGT@eurotNOG,0PM0V@fuNOG,12PS2@opiNOG,COG2272@NOG,KOG4389@euNOG	NA|NA|NA	T	Triacylglycerol lipase
tF03570	1047171.EFQ32853	6.3e-73	279.6	FG03895.1				fuNOG[21]	03QET@ascNOG,0H72Q@dotNOG,0IHBD@euNOG,0PMI4@fuNOG,11HBP@NOG,13PB9@opiNOG	NA|NA|NA
tF03571	1047171.EFQ32852	1.8e-69	268.1					fuNOG[21]	03R29@ascNOG,0H70D@dotNOG,0IW0K@euNOG,0PN1N@fuNOG,1226G@NOG,13PRM@opiNOG	NA|NA|NA
tF03589	426418.XP_001940701.1	1.8e-220	770.8		GO:0000041,GO:0003674,GO:0003824,GO:0004322,GO:0005575,GO:0005622,GO:0005623,GO:0005737,GO:0005783,GO:0005886,GO:0006810,GO:0006811,GO:0006812,GO:0006826,GO:0006873,GO:0006875,GO:0006879,GO:0007275,GO:0008150,GO:0008152,GO:0009987,GO:0015684,GO:0016020,GO:0016491,GO:0016722,GO:0016724,GO:0019725,GO:0030001,GO:0030003,GO:0032501,GO:0032502,GO:0033212,GO:0033215,GO:0034220,GO:0034755,GO:0042592,GO:…	K19791		fuNOG[21]	03KS3@ascNOG,0H3DK@dotNOG,0PHHS@fuNOG,12Q5N@opiNOG,15821@pleNOG,COG2132@NOG,KOG1263@euNOG	NA|NA|NA	Q	Multicopper oxidase
tF03604	36630.CADNFIAP00003392	3.4e-129	467.6					fuNOG[21]	03MWW@ascNOG,0IJFV@euNOG,0ME0A@euroNOG,0MTX3@eurotNOG,0PHWY@fuNOG,0XPUV@NOG,13KXY@opiNOG	NA|NA|NA	S	Arylsulfotransferase (ASST)
tF03609	771870.XP_003344866.1	9.9e-88	329.7		GO:0003008,GO:0003674,GO:0003824,GO:0003990,GO:0004091,GO:0004104,GO:0006066,GO:0006576,GO:0006807,GO:0007154,GO:0007267,GO:0007268,GO:0007271,GO:0008150,GO:0008152,GO:0009308,GO:0009987,GO:0016787,GO:0016788,GO:0019226,GO:0019695,GO:0023052,GO:0032501,GO:0034641,GO:0035637,GO:0042439,GO:0044106,GO:0044237,GO:0044281,GO:0044699,GO:0044700,GO:0044707,GO:0044710,GO:0044763,GO:0050877,GO:0052689,GO:…			fuNOG[21]	03JRS@ascNOG,0PKN8@fuNOG,13NZ4@opiNOG,19J89@sordNOG,1ADCB@sorNOG,COG2272@NOG,KOG4389@euNOG	NA|NA|NA	T	Carboxylesterase family
tF03629	515849.XP_001906820.1	9.4e-68	263.1	PEP1	GO:0005575,GO:0005576,GO:0006508,GO:0008150,GO:0008152,GO:0019538,GO:0043170,GO:0044238,GO:0071704	K01379,K06004		fuNOG[21]	03JP4@ascNOG,0PH8I@fuNOG,0XNV7@NOG,12NU9@opiNOG,19UMV@sordNOG,1AB7N@sorNOG,KOG1339@euNOG	NA|NA|NA	O	Eukaryotic aspartyl protease
tF03647	5059.CADAFLAP00003631	1.2e-79	302.4	FG06497.1				fuNOG[21]	0IGS8@euNOG,0PJ72@fuNOG,0XQG8@NOG,12SUG@opiNOG	NA|NA|NA	S	Conserved hypothetical protein
tF03654	51453.JGI43873	6.1e-09	68.2	CHT2	GO:0000910,GO:0000920,GO:0003674,GO:0003824,GO:0004553,GO:0004568,GO:0005575,GO:0005576,GO:0005618,GO:0005622,GO:0005623,GO:0005634,GO:0005635,GO:0005737,GO:0005773,GO:0005783,GO:0005933,GO:0005935,GO:0006022,GO:0006026,GO:0006030,GO:0006032,GO:0006040,GO:0006807,GO:0007049,GO:0007109,GO:0008150,GO:0008152,GO:0008843,GO:0009056,GO:0009057,GO:0009277,GO:0009987,GO:0012505,GO:0016787,GO:0016798,GO:…	K01183		fuNOG[21]	03MQB@ascNOG,0PIRU@fuNOG,11GPA@NOG,12T4G@opiNOG,KOG4701@euNOG	NA|NA|NA	G	chitinase
tF03660	426418.XP_001933080.1	3.6e-35	153.7					fuNOG[21]	03SM3@ascNOG,0H7E5@dotNOG,0IZIX@euNOG,0PPN8@fuNOG,121AD@NOG,13TAQ@opiNOG,15CSJ@pleNOG	NA|NA|NA	S	Cutinase
tF03661	5059.CADAFLAP00002292	2.1e-94	350.5	ERG2	GO:0000003,GO:0000247,GO:0003006,GO:0003674,GO:0003824,GO:0005575,GO:0005622,GO:0005623,GO:0005737,GO:0005783,GO:0005789,GO:0006066,GO:0006629,GO:0006694,GO:0006696,GO:0007049,GO:0008150,GO:0008152,GO:0008202,GO:0008204,GO:0008610,GO:0009058,GO:0009653,GO:0009987,GO:0012505,GO:0016020,GO:0016125,GO:0016126,GO:0016128,GO:0016129,GO:0016853,GO:0016860,GO:0016863,GO:0019953,GO:0022402,GO:0022413,GO:…	K09829	C8STI	fuNOG[21]	03NV2@ascNOG,0PGCM@fuNOG,0XP0Z@NOG,12PAF@opiNOG,KOG4143@euNOG	NA|NA|NA	I	C-8 sterol isomerase
tF03722	5062.CADAORAP00002411	3.7e-21	106.3					euNOG[57]	COG2303@NOG,KOG1238@euNOG	NA|NA|NA	G	Dehydrogenase
tF03741	229533.XP_383871.1	3.7e-74	283.5	FG03695.1				fuNOG[21]	03RJ1@ascNOG,0IWNJ@euNOG,0PMY2@fuNOG,0SJFT@hypNOG,0WTBI@necNOG,121KN@NOG,13QCD@opiNOG,19P1S@sordNOG	NA|NA|NA	S	Glycosyl hydrolase family 61
tF03751	5085.CADAFUBP00004720	2e-104	384.8	EGLC	GO:0005575,GO:0005618,GO:0005623,GO:0005886,GO:0016020,GO:0030312,GO:0044464,GO:0071944	K01199,K01210		NOG[107]	COG5309@NOG	NA|NA|NA	G	cell wall
tF03790	526221.XP_003000688.1	6.8e-205	719.2					fuNOG[21]	04C41@ascNOG,0JBB8@euNOG,0QC64@fuNOG,139MI@opiNOG,COG1231@NOG	NA|NA|NA	H	Flavin containing amine oxidoreductase
tF03811	426418.XP_001930415.1	1.2e-158	565.1	MNS1B	GO:0005575,GO:0005576,GO:0005622,GO:0005623,GO:0005737,GO:0016023,GO:0031410,GO:0031974,GO:0031982,GO:0031983,GO:0031988,GO:0043226,GO:0043227,GO:0043229,GO:0043231,GO:0043233,GO:0044422,GO:0044424,GO:0044433,GO:0044444,GO:0044446,GO:0044464,GO:0060205	K01230		fuNOG[21]	03N19@ascNOG,0H3P2@dotNOG,0PM8H@fuNOG,0XP04@NOG,13K36@opiNOG,157BJ@pleNOG,KOG2204@euNOG	NA|NA|NA	G	Glycosyl hydrolase family 47
tF03834	426418.XP_001934373.1	4.1e-163	580.5					fuNOG[21]	03N3S@ascNOG,0H4XH@dotNOG,0II3R@euNOG,0PJ5J@fuNOG,0Y9TP@NOG,13K7P@opiNOG,157AR@pleNOG	NA|NA|NA	O	Peptidase family S41
tF03848	426418.XP_001938550.1	7.5e-204	715.7	ATG15	GO:0000003,GO:0000139,GO:0003006,GO:0003674,GO:0003824,GO:0005575,GO:0005622,GO:0005623,GO:0005737,GO:0005768,GO:0005770,GO:0005771,GO:0005773,GO:0005775,GO:0005783,GO:0005789,GO:0005794,GO:0006624,GO:0006914,GO:0006950,GO:0006995,GO:0006996,GO:0007032,GO:0007049,GO:0007154,GO:0008150,GO:0008152,GO:0009056,GO:0009267,GO:0009605,GO:0009653,GO:0009987,GO:0009991,GO:0010008,GO:0010324,GO:0010467,GO:…	K17900		fuNOG[21]	03J7J@ascNOG,0H680@dotNOG,0PG9B@fuNOG,12SEN@opiNOG,158BX@pleNOG,COG5153@NOG,KOG4540@euNOG	NA|NA|NA	I	Lipase (class 3)
tF03873	5022.CBX93965	2e-88	331.6	FG06208.1				fuNOG[21]	03MCV@ascNOG,0H3SY@dotNOG,0IFR4@euNOG,0PIEX@fuNOG,0XPS6@NOG,12R7E@opiNOG,1581I@pleNOG	NA|NA|NA	S	Glycosyl hydrolase family 61
tF03881	36630.CADNFIAP00000519	6.2e-50	203					fuNOG[21]	043T6@ascNOG,0K0FF@euNOG,0MD0B@euroNOG,0MTZJ@eurotNOG,0Q2C0@fuNOG,10AYK@NOG,14H0R@opiNOG	NA|NA|NA
tF03893	526221.XP_003004170.1	4.9e-11	72.8					fuNOG[21]	041C3@ascNOG,0JIIT@euNOG,0PZVU@fuNOG,1172I@NOG,14A1Q@opiNOG,19TNB@sordNOG	NA|NA|NA
tF03985	40559.EDN18783	2.7e-94	350.9	FG00173.1				fuNOG[21]	03PAC@ascNOG,0IHNQ@euNOG,0PJVM@fuNOG,12PP1@opiNOG,COG2273@NOG	NA|NA|NA	G	Cell wall glucanase
tF03990	140110.NechaP88077	8.4e-29	132.5	FG07918.1				fuNOG[21]	03U6N@ascNOG,0J1YS@euNOG,0PQSH@fuNOG,0SN8X@hypNOG,0WWF3@necNOG,11WIA@NOG,13UVI@opiNOG,19N5I@sordNOG	NA|NA|NA
tF04021	13684.SNOT_03584	7.3e-287	992.3	IRE1	GO:0000166,GO:0001882,GO:0001883,GO:0003674,GO:0003824,GO:0004518,GO:0004519,GO:0004521,GO:0004540,GO:0004672,GO:0004674,GO:0005488,GO:0005515,GO:0005524,GO:0005575,GO:0005622,GO:0005623,GO:0005634,GO:0005737,GO:0005783,GO:0005789,GO:0005975,GO:0006020,GO:0006066,GO:0006139,GO:0006401,GO:0006402,GO:0006464,GO:0006468,GO:0006725,GO:0006793,GO:0006796,GO:0006807,GO:0006950,GO:0006984,GO:0006986,GO:…	K08852		fuNOG[21]	03IF4@ascNOG,0H3IP@dotNOG,0PFXN@fuNOG,12NK5@opiNOG,15DWX@pleNOG,COG0515@NOG,KOG1027@euNOG	NA|NA|NA	T	Ribonuclease 2-5A
tF04024	1047171.EFQ34446	2e-205	720.7	FG09141.1	GO:0000322,GO:0000323,GO:0000324,GO:0003674,GO:0003824,GO:0003840,GO:0005575,GO:0005576,GO:0005622,GO:0005623,GO:0005737,GO:0005773,GO:0005774,GO:0005783,GO:0005789,GO:0006082,GO:0006518,GO:0006520,GO:0006575,GO:0006749,GO:0006751,GO:0006790,GO:0006805,GO:0006807,GO:0006950,GO:0006979,GO:0006995,GO:0007154,GO:0008150,GO:0008152,GO:0009056,GO:0009063,GO:0009267,GO:0009410,GO:0009605,GO:0009987,GO:…	K00681,K18592	GTMLT	fuNOG[21]	03IEE@ascNOG,0H5V2@dotNOG,0PGQX@fuNOG,12RPB@opiNOG,COG0405@NOG,KOG2410@euNOG	NA|NA|NA	E	Gamma-glutamyltranspeptidase
tF04087	13684.SNOT_12554	1.2e-41	174.9	NPC2	GO:0000322,GO:0000323,GO:0000324,GO:0000328,GO:0005575,GO:0005622,GO:0005623,GO:0005737,GO:0005773,GO:0005775,GO:0005794,GO:0006810,GO:0006869,GO:0008150,GO:0009987,GO:0010876,GO:0015850,GO:0015918,GO:0016023,GO:0031410,GO:0031974,GO:0031982,GO:0031988,GO:0032365,GO:0032366,GO:0033036,GO:0043226,GO:0043227,GO:0043229,GO:0043231,GO:0043233,GO:0044422,GO:0044424,GO:0044437,GO:0044444,GO:0044446,GO:…			fuNOG[21]	03TAQ@ascNOG,0H7UD@dotNOG,0PQD6@fuNOG,11SSC@NOG,13T2V@opiNOG,15CX6@pleNOG,KOG4680@euNOG	NA|NA|NA	U	Inherit from dotNOG: ML domain
tF04118	5085.CADAFUBP00007566	5.1e-116	422.9			K01179		fuNOG[21]	04DUG@ascNOG,0JZP2@euNOG,0MA34@euroNOG,0MU1V@eurotNOG,0Q19W@fuNOG,13DQ4@opiNOG,COG2730@NOG	NA|NA|NA	G	fCBD
tF04144	426418.XP_001941120.1	4.2e-45	186	FG11205.1	GO:0005575,GO:0005576,GO:0005622,GO:0005623,GO:0008150,GO:0044046,GO:0044403,GO:0044419,GO:0044464,GO:0051701,GO:0051704,GO:0052047,GO:0052048,GO:0052051,GO:0052211			fuNOG[21]	03T2G@ascNOG,0H7KT@dotNOG,0IYFD@euNOG,0PQ64@fuNOG,11YGH@NOG,13SJR@opiNOG,15CBW@pleNOG	NA|NA|NA	S	Cerato-platanin
tF04183	1064592.XP_003676343.1	1.8e-09	68.6		GO:0003674,GO:0003824,GO:0003924,GO:0005575,GO:0005622,GO:0005623,GO:0005737,GO:0006139,GO:0006152,GO:0006163,GO:0006184,GO:0006195,GO:0006200,GO:0006259,GO:0006281,GO:0006725,GO:0006753,GO:0006793,GO:0006796,GO:0006807,GO:0006950,GO:0006974,GO:0008150,GO:0008152,GO:0009056,GO:0009116,GO:0009117,GO:0009119,GO:0009123,GO:0009125,GO:0009126,GO:0009128,GO:0009141,GO:0009143,GO:0009144,GO:0009146,GO:…			fuNOG[21]	03RAM@ascNOG,0IW42@euNOG,0PN9M@fuNOG,0XWVH@NOG,13QXH@opiNOG,19B1G@saccNOG,19GX5@sacNOG	NA|NA|NA
tF04238	5180.EDO01680	1.2e-08	65.5	PPG1	GO:0000772,GO:0003674,GO:0005102,GO:0005186,GO:0005488,GO:0005515,GO:0005575,GO:0005576,GO:0008150,GO:0010033,GO:0019236,GO:0042221,GO:0050896			fuNOG[21]	03URS@ascNOG,0J2TW@euNOG,0PSW8@fuNOG,113ZU@NOG,13Y2V@opiNOG	NA|NA|NA	S	pheromone
tF04239	39416.CAZ85023	9.4e-28	129.4	FG07441.1				fuNOG[21]	03TSI@ascNOG,0J0FH@euNOG,0PQNX@fuNOG,120GF@NOG,13UA7@opiNOG	NA|NA|NA	S	Conserved hypothetical protein
tF04245	559305.XP_003239474.1	1.9e-77	295.4		GO:0003008,GO:0003674,GO:0003824,GO:0003990,GO:0004091,GO:0004104,GO:0006066,GO:0006576,GO:0006807,GO:0007154,GO:0007267,GO:0007268,GO:0007271,GO:0008150,GO:0008152,GO:0009308,GO:0009987,GO:0016787,GO:0016788,GO:0019226,GO:0019695,GO:0023052,GO:0032501,GO:0034641,GO:0035637,GO:0042439,GO:0044106,GO:0044237,GO:0044281,GO:0044699,GO:0044700,GO:0044707,GO:0044710,GO:0044763,GO:0050877,GO:0052689,GO:…			fuNOG[21]	0301Y@arthNOG,03JRS@ascNOG,0M2U5@euroNOG,0PKN8@fuNOG,12MK2@onyNOG,13NZ4@opiNOG,COG2272@NOG,KOG4389@euNOG	NA|NA|NA	T	Carboxylesterase family
tF04248	13684.SNOT_05402	8e-189	665.6	ALG11	GO:0000026,GO:0000030,GO:0003674,GO:0003824,GO:0005575,GO:0005622,GO:0005623,GO:0005737,GO:0005783,GO:0005789,GO:0005975,GO:0006464,GO:0006486,GO:0006488,GO:0006490,GO:0006629,GO:0007275,GO:0008150,GO:0008152,GO:0009058,GO:0009059,GO:0009100,GO:0009101,GO:0009311,GO:0009987,GO:0012505,GO:0016020,GO:0016740,GO:0016757,GO:0016758,GO:0019538,GO:0031090,GO:0032501,GO:0032502,GO:0034645,GO:0036211,GO:…	K03844		fuNOG[21]	03MN8@ascNOG,0H6TE@dotNOG,0PIAX@fuNOG,12Q59@opiNOG,157CQ@pleNOG,COG0438@NOG,KOG1387@euNOG	NA|NA|NA	M	Glycosyl transferases group 1
tF04268	426418.XP_001932743.1	4e-238	829.3			K01288		fuNOG[21]	03XIW@ascNOG,0HAHG@dotNOG,0PI2P@fuNOG,13J5U@opiNOG,15E81@pleNOG,COG2939@NOG,KOG1282@euNOG	NA|NA|NA	E, O	Serine carboxypeptidase
tF04322	861557.XP_003300151.1	8.6e-65	252.3	ROT1	GO:0000003,GO:0000910,GO:0003674,GO:0005488,GO:0005515,GO:0005575,GO:0005622,GO:0005623,GO:0005737,GO:0005783,GO:0005789,GO:0005975,GO:0006457,GO:0006458,GO:0006464,GO:0006486,GO:0006487,GO:0006493,GO:0006950,GO:0006984,GO:0006986,GO:0006996,GO:0007010,GO:0007049,GO:0007114,GO:0007117,GO:0007118,GO:0007154,GO:0007163,GO:0007165,GO:0008150,GO:0008152,GO:0009058,GO:0009059,GO:0009100,GO:0009101,GO:…			fuNOG[21]	03ITC@ascNOG,0HB5Q@dotNOG,0IJWX@euNOG,0PFUS@fuNOG,11IZT@NOG,13KVY@opiNOG,15BFS@pleNOG	NA|NA|NA	U	Chaperone for protein-folding within the ER, fungal
tF04330	40559.EDN27097	1.1e-110	405.6	FG06497.1				fuNOG[21]	03N5D@ascNOG,0IGS8@euNOG,0PJ72@fuNOG,0XQG8@NOG,12SUG@opiNOG	NA|NA|NA	S	Conserved hypothetical protein
tF04351	5085.CADAFUBP00002387	3.1e-176	623.6		GO:0003674,GO:0003824,GO:0004091,GO:0008150,GO:0008152,GO:0016787,GO:0016788,GO:0052689			euNOG[57]	COG2272@NOG,KOG4389@euNOG	NA|NA|NA	T	ACEtylcholinesterase
tF04450	426418.XP_001932168.1	3.4e-84	317.4					fuNOG[21]	04D8K@ascNOG,0HBJA@dotNOG,0IMQC@euNOG,0QD91@fuNOG,10ZJF@NOG,13AZB@opiNOG,15F7J@pleNOG	NA|NA|NA
tF04482	5022.CBX96540	2.5e-81	307.4	FG07412.1				fuNOG[21]	03R07@ascNOG,0H7FD@dotNOG,0IVX8@euNOG,0PN1B@fuNOG,1286Q@NOG,13QFN@opiNOG,1597Q@pleNOG	NA|NA|NA
tF04528	573729.XP_003666466.1	1.1e-21	109	FG03662.1				fuNOG[21]	03ZY3@ascNOG,0CWVB@chaNOG,0JDUE@euNOG,0PXQ0@fuNOG,0YNB6@NOG,13W3J@opiNOG,19SD6@sordNOG,1AEND@sorNOG	NA|NA|NA
tF04556	1047171.EFQ25511	9e-55	218.8		GO:0005575,GO:0005622,GO:0005623,GO:0005737,GO:0005773,GO:0043226,GO:0043227,GO:0043229,GO:0043231,GO:0044424,GO:0044444,GO:0044464			fuNOG[21]	03RUG@ascNOG,0H7RM@dotNOG,0IY4F@euNOG,0PPF6@fuNOG,0Y1DR@NOG,13RKD@opiNOG	NA|NA|NA	S	Inherit from ascNOG: FAS1 domain-containing protein
tF04563	65071.PYU1_T003340	9.2e-109	399.1					euNOG[57]	0IE5F@euNOG,COG1917@NOG	NA|NA|NA	S	quercetin 2,3-dioxygenase
tF04602	426418.XP_001941519.1	1.1e-49	203					fuNOG[21]	03VK4@ascNOG,0H7DM@dotNOG,0J3EE@euNOG,0PS6M@fuNOG,0Y44A@NOG,13YDR@opiNOG,157QZ@pleNOG	NA|NA|NA
tF04647	222929.XP_003070244.1	1e-08	65.9	FG10176.1				fuNOG[21]	03S6C@ascNOG,0IY0J@euNOG,0M60X@euroNOG,0PP9T@fuNOG,124H6@NOG,12IRC@onyNOG,13SBX@opiNOG	NA|NA|NA	S	GPI anchored protein
tF04678	426418.XP_001937272.1	2.2e-205	720.7	FG11228.1				fuNOG[21]	03IZT@ascNOG,0H3T8@dotNOG,0PJ5E@fuNOG,13JPN@opiNOG,15AIX@pleNOG,COG2303@NOG,KOG1238@euNOG	NA|NA|NA	E	GMC oxidoreductase
tF04689	861557.XP_003300194.1	6.4e-93	346.3	MRL1	GO:0003674,GO:0005048,GO:0005488,GO:0005575,GO:0005622,GO:0005623,GO:0005737,GO:0005768,GO:0005770,GO:0005794,GO:0005802,GO:0006810,GO:0007034,GO:0008150,GO:0009987,GO:0010008,GO:0016020,GO:0031090,GO:0032588,GO:0033218,GO:0042277,GO:0043226,GO:0043227,GO:0043229,GO:0043231,GO:0044422,GO:0044424,GO:0044440,GO:0044444,GO:0044446,GO:0044464,GO:0044699,GO:0044763,GO:0044765,GO:0046907,GO:0051179,GO:…	K10089		fuNOG[21]	03Q4E@ascNOG,0H3Z7@dotNOG,0PKV8@fuNOG,0ZWHP@NOG,13M8Y@opiNOG,15A8I@pleNOG,KOG4504@euNOG	NA|NA|NA	T, U	Mannose-6-phosphate receptor
tF04728	500485.XP_002569028.1	3.6e-77	293.1	FG08002.1				fuNOG[21]	03MSP@ascNOG,0IVJD@euNOG,0MD80@euroNOG,0MH5F@eurotNOG,0PM15@fuNOG,10E4E@NOG,13NK7@opiNOG	NA|NA|NA
tF04778	5180.EDN97094	0	1063.5					fuNOG[21]	03M81@ascNOG,0IJ80@euNOG,0PM7C@fuNOG,13M5D@opiNOG,COG3537@NOG	NA|NA|NA	G	alpha-1,2-mannosidase
tF04797	5061.CADANGAP00008004	2.6e-41	173.3	LCL2				NOG[107]	127SF@NOG	NA|NA|NA	U	component of the endoplasmic reticulum- associated degradation (ERAD) pathway (By similarity)
tF04838	5022.CBX92819	1.1e-22	112.5	FG07010.1				fuNOG[21]	03PZU@ascNOG,0H6Y1@dotNOG,0IVEU@euNOG,0PMHV@fuNOG,11QHD@NOG,13PEM@opiNOG,158EH@pleNOG	NA|NA|NA
tF04841	339724.XP_001544781.1	3.4e-90	337	BGL2	GO:0000272,GO:0003674,GO:0003824,GO:0004338,GO:0004553,GO:0005575,GO:0005618,GO:0005623,GO:0005975,GO:0005976,GO:0006073,GO:0008150,GO:0008152,GO:0008422,GO:0009056,GO:0009057,GO:0009251,GO:0009272,GO:0009277,GO:0009987,GO:0010383,GO:0015926,GO:0016043,GO:0016052,GO:0016740,GO:0016787,GO:0016798,GO:0030312,GO:0031505,GO:0034406,GO:0042123,GO:0042124,GO:0042546,GO:0042973,GO:0043170,GO:0044036,GO:…	K01210	13BGH	fuNOG[21]	03P4R@ascNOG,0IJD5@euNOG,0M64B@euroNOG,0PK2A@fuNOG,12GH8@onyNOG,13HHX@opiNOG,COG5309@NOG	NA|NA|NA	G	Glycosyl hydrolases family 17
tF04903	13684.SNOT_09717	6.5e-187	659.4	VPS62	GO:0000322,GO:0000323,GO:0000324,GO:0000329,GO:0005575,GO:0005622,GO:0005623,GO:0005737,GO:0005773,GO:0005774,GO:0006605,GO:0006623,GO:0006810,GO:0006886,GO:0007034,GO:0008104,GO:0008150,GO:0009987,GO:0015031,GO:0016020,GO:0016482,GO:0031090,GO:0033036,GO:0033365,GO:0034613,GO:0043226,GO:0043227,GO:0043229,GO:0043231,GO:0044422,GO:0044424,GO:0044437,GO:0044444,GO:0044446,GO:0044464,GO:0044699,GO:…			fuNOG[21]	03Q8Y@ascNOG,0H3DM@dotNOG,0IK1B@euNOG,0PIDW@fuNOG,0YDU1@NOG,13JUY@opiNOG,158YX@pleNOG	NA|NA|NA	S	Plant protein of unknown function (DUF946)
tF04909	13684.SNOT_01504	2.5e-310	1069.7	CWH41	GO:0003674,GO:0003824,GO:0004553,GO:0004573,GO:0005575,GO:0005622,GO:0005623,GO:0005737,GO:0005783,GO:0005789,GO:0005975,GO:0006464,GO:0006486,GO:0006487,GO:0008150,GO:0008152,GO:0009058,GO:0009059,GO:0009100,GO:0009101,GO:0009272,GO:0009987,GO:0012505,GO:0015926,GO:0016020,GO:0016787,GO:0016798,GO:0019538,GO:0031090,GO:0034645,GO:0036211,GO:0042175,GO:0042546,GO:0043170,GO:0043226,GO:0043227,GO:…	K01228		fuNOG[21]	03I88@ascNOG,0H65P@dotNOG,0PF8P@fuNOG,0XTHA@NOG,130BU@opiNOG,159P8@pleNOG,KOG2161@euNOG	NA|NA|NA	G	Mannosyl oligosaccharide glucosidase
tF04953	5022.CBX94886	1.4e-195	688					fuNOG[21]	04CU9@ascNOG,0H9WY@dotNOG,0QCI3@fuNOG,12TED@opiNOG,15E0G@pleNOG,COG2272@NOG,KOG4389@euNOG	NA|NA|NA	T	Carboxylesterase family
tF04955	1047171.EFQ34199	3.1e-149	533.9	FG03893.1				fuNOG[21]	03PT3@ascNOG,0H3PD@dotNOG,0IIT0@euNOG,0PKMN@fuNOG,13KMV@opiNOG,COG0402@NOG	NA|NA|NA	F	Amidohydrolase family
tF04969	13684.SNOT_15051	5e-25	120.9	FG02338.1				fuNOG[21]	03Z1S@ascNOG,0HB3C@dotNOG,0JBXJ@euNOG,0PWQ5@fuNOG,0YHVK@NOG,144II@opiNOG,15EKR@pleNOG	NA|NA|NA	S	FAS1
tF05007	13684.SNOT_00033	4.1e-166	589.7	PGAX	GO:0000272,GO:0003674,GO:0003824,GO:0004553,GO:0004650,GO:0005575,GO:0005576,GO:0005975,GO:0005976,GO:0008150,GO:0008152,GO:0009056,GO:0009057,GO:0010393,GO:0016052,GO:0016787,GO:0016798,GO:0043170,GO:0044238,GO:0045488,GO:0045490,GO:0071704,GO:1901575	K01213		fuNOG[21]	03N9T@ascNOG,0H55T@dotNOG,0IK0F@euNOG,0PG7M@fuNOG,13ICK@opiNOG,159ZJ@pleNOG,COG5434@NOG	NA|NA|NA	G	Glycosyl hydrolases family 28
tF05025	5062.CADAORAP00011015	1.7e-286	990.3	CATB	GO:0005575,GO:0005576	K03781		fuNOG[21]	03M7A@ascNOG,0M62R@euroNOG,0MKEH@eurotNOG,0PM93@fuNOG,12ZSP@opiNOG,COG0753@NOG,KOG0047@euNOG	NA|NA|NA	P	Occurs in almost all aerobically respiring organisms and serves to protect cells from the toxic effects of hydrogen peroxide
tF05026	222929.XP_003066070.1	5.3e-138	496.5					fuNOG[21]	03UT7@ascNOG,0J2IW@euNOG,0M7MZ@euroNOG,0PS39@fuNOG,0YTI3@NOG,12JQ3@onyNOG,13XYY@opiNOG	NA|NA|NA
tF05029	140110.NechaP30263	1.7e-181	641	FG06469.1				fuNOG[21]	03J9K@ascNOG,0IGSQ@euNOG,0PKW4@fuNOG,0SDGR@hypNOG,0WXX5@necNOG,0XTFB@NOG,13KKY@opiNOG,19TXC@sordNOG	NA|NA|NA	S	Inherit from ascNOG: Conserved hypothetical protein
tF05031	140110.NechaP53189	6.9e-127	459.1	FG02263.1				fuNOG[21]	03PN9@ascNOG,0ITAH@euNOG,0PKKE@fuNOG,13P3K@opiNOG,COG1840@NOG	NA|NA|NA	P	ABC-type Fe3 transport system
tF05052	861557.XP_003295307.1	2.3e-55	220.7	FG01466.1	GO:0005575,GO:0005622,GO:0005623,GO:0005737,GO:0005783,GO:0005788,GO:0005794,GO:0005796,GO:0031974,GO:0043226,GO:0043227,GO:0043229,GO:0043231,GO:0043233,GO:0044422,GO:0044424,GO:0044431,GO:0044432,GO:0044444,GO:0044446,GO:0044464,GO:0070013			fuNOG[21]	03RRZ@ascNOG,0H7FJ@dotNOG,0IXMN@euNOG,0PNVN@fuNOG,11RBX@NOG,13S5I@opiNOG,15BF1@pleNOG	NA|NA|NA	S	Inherit from ascNOG: Secretory pathway protein Ssp120
tF05065	5059.CADAFLAP00010945	3.6e-188	663.3	FG11386.1	GO:0003674,GO:0003824,GO:0004091,GO:0005575,GO:0005576,GO:0008150,GO:0008152,GO:0016787,GO:0016788,GO:0052689			fuNOG[21]	03PKK@ascNOG,0PM9K@fuNOG,13KI9@opiNOG,COG2272@NOG,KOG4389@euNOG	NA|NA|NA	T	Carboxylesterase family
tF05101	5061.CADANGAP00000603	1.6e-08	65.5	FG02190.1				fuNOG[21]	03VWY@ascNOG,0J7TV@euNOG,0MDPP@euroNOG,0MNU8@eurotNOG,0PU4H@fuNOG,0YV7B@NOG,13Z67@opiNOG	NA|NA|NA	S	IgE-binding protein
tF05109	861557.XP_003299384.1	4e-137	493.8					fuNOG[21]	03KNY@ascNOG,0H3CI@dotNOG,0PIFQ@fuNOG,13KBF@opiNOG,1589Q@pleNOG,COG2272@NOG,KOG4389@euNOG	NA|NA|NA	T	Carboxylesterase family
tF05113	861557.XP_003305915.1	8.4e-73	278.9					fuNOG[21]	03SI6@ascNOG,0H78S@dotNOG,0IXKB@euNOG,0PNR3@fuNOG,11MY3@NOG,13RDU@opiNOG,15BA9@pleNOG	NA|NA|NA	G	Glycosyl hydrolase family 61
tF05114	240176.XP_001833826.2	2.9e-18	98.2					opiNOG[43]	0IHR1@euNOG,0YRGU@NOG,1376C@opiNOG	NA|NA|NA	O	Pregnancy-associated plasma protein-A
tF05118	5061.CADANGAP00000179	6.4e-233	812.4			K12373		fuNOG[21]	03J9V@ascNOG,0IEC9@euNOG,0PGBW@fuNOG,13K62@opiNOG,COG3525@NOG	NA|NA|NA	G	Glycosyl hydrolase family 20, catalytic domain
tF05154	861557.XP_003302294.1	4.6e-56	222.6		GO:0005575,GO:0005622,GO:0005623,GO:0005634,GO:0005737,GO:0005783,GO:0005801,GO:0005829,GO:0006140,GO:0006810,GO:0006886,GO:0006888,GO:0008104,GO:0008150,GO:0009118,GO:0009894,GO:0009966,GO:0009987,GO:0010646,GO:0015031,GO:0016192,GO:0016482,GO:0019219,GO:0019220,GO:0019222,GO:0023051,GO:0030008,GO:0030811,GO:0031323,GO:0031329,GO:0032313,GO:0032318,GO:0032483,GO:0032991,GO:0033036,GO:0033121,GO:…			fuNOG[21]	03RIP@ascNOG,0H7Z3@dotNOG,0PRFI@fuNOG,13A16@opiNOG,15BYU@pleNOG,COG5122@NOG,KOG3369@euNOG	NA|NA|NA	U	Sybindin-like family
tF05183	5022.CBX99686	1.5e-44	185.3					fuNOG[21]	03RB3@ascNOG,0H812@dotNOG,0IWZF@euNOG,0PN9Z@fuNOG,125T5@NOG,13QNB@opiNOG,159C7@pleNOG	NA|NA|NA	S	Protein of unknown function (DUF3455)
tF05229	526221.XP_003000769.1	4e-74	283.5	FG00099.1		K01674		fuNOG[21]	03RJB@ascNOG,0PN6H@fuNOG,13QVT@opiNOG,COG3338@NOG,KOG0382@euNOG	NA|NA|NA	P	Carb_anhydrase
tF05243	578455.XP_003650928.1	2.1e-180	637.5	FAEB-2	GO:0005575,GO:0005576	K09252		fuNOG[21]	03I8P@ascNOG,0CVWK@chaNOG,0IDXJ@euNOG,0PF9F@fuNOG,0XQEN@NOG,12N2E@opiNOG,19IFU@sordNOG,1AF54@sorNOG	NA|NA|NA	G	Tannase and feruloyl esterase
tF05269	40559.EDN33476	4e-186	656	FG02206.1	GO:0003674,GO:0003824,GO:0004053,GO:0005575,GO:0005622,GO:0005623,GO:0005737,GO:0005783,GO:0006082,GO:0006520,GO:0006807,GO:0006950,GO:0008150,GO:0008152,GO:0009987,GO:0016787,GO:0016810,GO:0016813,GO:0019752,GO:0033554,GO:0043226,GO:0043227,GO:0043229,GO:0043231,GO:0043436,GO:0044237,GO:0044238,GO:0044281,GO:0044424,GO:0044444,GO:0044464,GO:0044699,GO:0044710,GO:0044763,GO:0050896,GO:0051716,GO:…	K01480		fuNOG[21]	03J00@ascNOG,0PI69@fuNOG,12RTM@opiNOG,COG0010@NOG,KOG2964@euNOG	NA|NA|NA	E	agmatinase
tF05291	33178.CADATEAP00002791	1.2e-127	462.2		GO:0005575,GO:0005576			fuNOG[21]	03QMQ@ascNOG,0IF1T@euNOG,0MC54@euroNOG,0MQTR@eurotNOG,0PKNQ@fuNOG,13P8D@opiNOG,COG0277@NOG	NA|NA|NA	C	FAD binding domain
tF05293	36630.CADNFIAP00003231	2.1e-195	687.2	FG04527.1		K01288		fuNOG[21]	03KW9@ascNOG,0MCD9@euroNOG,0MQJI@eurotNOG,0PHXN@fuNOG,13J5U@opiNOG,COG2939@NOG,KOG1282@euNOG	NA|NA|NA	E, O	Serine carboxypeptidase
tF05328	13684.SNOT_14138	4.5e-250	869.8	FG00728.1				fuNOG[21]	03J43@ascNOG,0H5XN@dotNOG,0IJBQ@euNOG,0PHK3@fuNOG,0Z52T@NOG,13JJG@opiNOG,159VU@pleNOG	NA|NA|NA	S	Heterokaryon incompatibility protein Het-C
tF05346	5180.EDN98178	6.5e-14	82.8					NOG[107]	0Z1H5@NOG	NA|NA|NA
tF05347	29875.EHK20454	9.8e-199	698.7	FG10604.1	GO:0003674,GO:0003824,GO:0008150,GO:0008152,GO:0016491,GO:0016679,GO:0016682,GO:0044710,GO:0052716,GO:0055114	K19791		fuNOG[21]	03NKM@ascNOG,0PGU0@fuNOG,0SCH8@hypNOG,13IAH@opiNOG,19IMX@sordNOG,COG2132@NOG,KOG1263@euNOG	NA|NA|NA	Q	Multicopper oxidase
tF05384	36630.CADNFIAP00007862	1.2e-80	306.6	FG08002.1				fuNOG[21]	03MSP@ascNOG,0IVJD@euNOG,0MD80@euroNOG,0MH5F@eurotNOG,0PM15@fuNOG,10E4E@NOG,13NK7@opiNOG	NA|NA|NA
tF05421	771870.XP_003344866.1	1.3e-157	562		GO:0003008,GO:0003674,GO:0003824,GO:0003990,GO:0004091,GO:0004104,GO:0006066,GO:0006576,GO:0006807,GO:0007154,GO:0007267,GO:0007268,GO:0007271,GO:0008150,GO:0008152,GO:0009308,GO:0009987,GO:0016787,GO:0016788,GO:0019226,GO:0019695,GO:0023052,GO:0032501,GO:0034641,GO:0035637,GO:0042439,GO:0044106,GO:0044237,GO:0044281,GO:0044699,GO:0044700,GO:0044707,GO:0044710,GO:0044763,GO:0050877,GO:0052689,GO:…			fuNOG[21]	03JRS@ascNOG,0PKN8@fuNOG,13NZ4@opiNOG,19J89@sordNOG,1ADCB@sorNOG,COG2272@NOG,KOG4389@euNOG	NA|NA|NA	T	Carboxylesterase family
tF05425	5180.EDO02572	6.4e-124	449.9		GO:0005575,GO:0005576			fuNOG[21]	03K2Y@ascNOG,0IFE6@euNOG,0PH5P@fuNOG,11WTG@NOG,12RZ5@opiNOG	NA|NA|NA	S	fasciclin domain family
tF05444	861557.XP_003298040.1	5.5e-97	359.8	FG08279.1	GO:0000322,GO:0000323,GO:0000324,GO:0000329,GO:0005575,GO:0005622,GO:0005623,GO:0005737,GO:0005773,GO:0005774,GO:0006605,GO:0006623,GO:0006810,GO:0006886,GO:0007034,GO:0008104,GO:0008150,GO:0009987,GO:0015031,GO:0016020,GO:0016482,GO:0031090,GO:0033036,GO:0033365,GO:0034613,GO:0043226,GO:0043227,GO:0043229,GO:0043231,GO:0044422,GO:0044424,GO:0044437,GO:0044444,GO:0044446,GO:0044464,GO:0044699,GO:…			fuNOG[21]	03Q8Y@ascNOG,0H6XW@dotNOG,0IK1B@euNOG,0PIDW@fuNOG,0YDU1@NOG,13JUY@opiNOG,15CSQ@pleNOG	NA|NA|NA	S	Inherit from ascNOG: Vacuolar protein sorting protein 62
tF05501	36630.CADNFIAP00003195	4.1e-100	370.2					fuNOG[21]	03NNS@ascNOG,0IHWA@euNOG,0M414@euroNOG,0MHF2@eurotNOG,0PK3Q@fuNOG,11ZMV@NOG,12SAT@opiNOG	NA|NA|NA	S	GDSL lipase acylhydrolase family protein
tF05578	426418.XP_001936301.1	3.4e-134	483.4	FG07180.1	GO:0003674,GO:0003756,GO:0003824,GO:0004656,GO:0005488,GO:0005515,GO:0005575,GO:0005576,GO:0005622,GO:0005623,GO:0005737,GO:0005783,GO:0005788,GO:0005793,GO:0005886,GO:0006082,GO:0006457,GO:0006464,GO:0006520,GO:0006575,GO:0006629,GO:0006807,GO:0006950,GO:0006979,GO:0008150,GO:0008152,GO:0009986,GO:0009987,GO:0015035,GO:0015036,GO:0016020,GO:0016023,GO:0016043,GO:0016491,GO:0016667,GO:0016705,GO:…	K09584		fuNOG[21]	03M36@ascNOG,0H6UT@dotNOG,0PGPE@fuNOG,13H4F@opiNOG,15AKF@pleNOG,COG0526@NOG,KOG0191@euNOG	NA|NA|NA	O	Endoplasmic reticulum protein ERp29, C-terminal domain
tF05594	33178.CADATEAP00006333	6.6e-126	456.1	FG07800.1				fuNOG[21]	03PHE@ascNOG,0IK30@euNOG,0M61B@euroNOG,0PMJA@fuNOG,0YF54@NOG,13PJ6@opiNOG	NA|NA|NA	S	Eukaryotic aspartyl protease
tF05651	861557.XP_003301708.1	4.8e-209	732.6	SUB8	GO:0000003,GO:0000322,GO:0000323,GO:0000324,GO:0000328,GO:0000746,GO:0000747,GO:0003674,GO:0003824,GO:0004091,GO:0004175,GO:0004252,GO:0005575,GO:0005576,GO:0005615,GO:0005618,GO:0005619,GO:0005622,GO:0005623,GO:0005737,GO:0005773,GO:0005775,GO:0005794,GO:0006139,GO:0006401,GO:0006508,GO:0006725,GO:0006807,GO:0006914,GO:0006950,GO:0006995,GO:0006996,GO:0007033,GO:0007039,GO:0007154,GO:0007275,GO:…	K01336		fuNOG[21]	03K64@ascNOG,0H401@dotNOG,0PFG2@fuNOG,13IFF@opiNOG,15ACQ@pleNOG,COG1404@NOG,KOG1153@euNOG	NA|NA|NA	O	Peptidase inhibitor I9
tF05654	1047171.EFQ35324	6.2e-50	203					fuNOG[21]	03ZX0@ascNOG,0H88N@dotNOG,0IZ4T@euNOG,0PXJK@fuNOG,122XJ@NOG,146NK@opiNOG	NA|NA|NA	S	Cutinase
tF05671	29875.EHK20454	6.7e-180	636	FG10604.1	GO:0003674,GO:0003824,GO:0008150,GO:0008152,GO:0016491,GO:0016679,GO:0016682,GO:0044710,GO:0052716,GO:0055114	K19791		fuNOG[21]	03NKM@ascNOG,0PGU0@fuNOG,0SCH8@hypNOG,13IAH@opiNOG,19IMX@sordNOG,COG2132@NOG,KOG1263@euNOG	NA|NA|NA	Q	Multicopper oxidase
tF05674	663202.XP_003018940.1	1.1e-08	65.9	FG02190.1				fuNOG[21]	030UD@arthNOG,03VWY@ascNOG,0J7TV@euNOG,0M8IX@euroNOG,0PU4H@fuNOG,0YV7B@NOG,12I5B@onyNOG,13Z67@opiNOG	NA|NA|NA	S	Inherit from onyNOG: IgE-binding protein
tF05705	5062.CADAORAP00000068	5.9e-96	356.3	FG08495.1		K05986		fuNOG[21]	03QPN@ascNOG,0IF7M@euNOG,0MBNG@euroNOG,0MRJA@eurotNOG,0PFR1@fuNOG,11UE2@NOG,13I2G@opiNOG	NA|NA|NA	L	S1/P1 Nuclease
tF05747	441959.XP_002487282.1	2.1e-17	96.7					fuNOG[21]	04282@ascNOG,0J1YU@euNOG,0MB33@euroNOG,0MTDX@eurotNOG,0Q07U@fuNOG,0YDUB@NOG,13W20@opiNOG	NA|NA|NA
tF05821	5022.CBX94475	1e-63	249.2					fuNOG[21]	04DBI@ascNOG,0HA83@dotNOG,0IN9W@euNOG,0QDCU@fuNOG,0Z061@NOG,13BF5@opiNOG,157BX@pleNOG	NA|NA|NA
tF05823	861557.XP_003306156.1	5.7e-214	749.6	FG05163.1				fuNOG[21]	03QF4@ascNOG,0H3IS@dotNOG,0IE4R@euNOG,0PFTA@fuNOG,0XNS8@NOG,12NGM@opiNOG,159JH@pleNOG	NA|NA|NA	S	Heterokaryon incompatibility protein Het-C
tF05825	5061.CADANGAP00005274	1.5e-25	122.1					fuNOG[21]	03VDH@ascNOG,0J3G3@euNOG,0PSHX@fuNOG,0XV98@NOG,13WXS@opiNOG	NA|NA|NA	S	LysM domain
tF05880	5022.CBX92557	9.5e-52	208.8	FG02386.1				fuNOG[21]	03QR4@ascNOG,0H42X@dotNOG,0IIU8@euNOG,0PKEE@fuNOG,112PD@NOG,13JTF@opiNOG,15D03@pleNOG	NA|NA|NA	G	Pectate lyase
tF05927	5022.CBX91835	2.5e-13	81.6					fuNOG[21]	042QQ@ascNOG,0H9KG@dotNOG,0JQJS@euNOG,0Q0VF@fuNOG,0Y4XY@NOG,14ET1@opiNOG,15C82@pleNOG	NA|NA|NA	S	Inherit from ascNOG: cell wall protein
tF05933	441959.XP_002480256.1	9.2e-90	335.5	FG00006.1				fuNOG[21]	03I9J@ascNOG,0IDXZ@euNOG,0M30I@euroNOG,0MN3I@eurotNOG,0PFAE@fuNOG,0Y8ZI@NOG,12N31@opiNOG	NA|NA|NA	S	Protein of unknown function (DUF3129)
tF05947	36630.CADNFIAP00003329	3.1e-27	127.9			K01210		fuNOG[21]	03JWX@ascNOG,0IHWI@euNOG,0MBS2@euroNOG,0MKN5@eurotNOG,0PIPD@fuNOG,10VFP@NOG,12U99@opiNOG	NA|NA|NA	S	Exo-beta-1,3-glucanase
tF05952	426418.XP_001940880.1	3.1e-209	734.2	LHS1	GO:0000166,GO:0000774,GO:0001882,GO:0001883,GO:0003674,GO:0005488,GO:0005515,GO:0005524,GO:0005575,GO:0005622,GO:0005623,GO:0005737,GO:0005783,GO:0005788,GO:0006457,GO:0006605,GO:0006612,GO:0006620,GO:0006810,GO:0006886,GO:0006950,GO:0006986,GO:0008104,GO:0008150,GO:0008152,GO:0009987,GO:0010033,GO:0015031,GO:0016482,GO:0017076,GO:0019222,GO:0019538,GO:0030234,GO:0030554,GO:0031204,GO:0031974,GO:…	K09486		fuNOG[21]	03JAV@ascNOG,0H57A@dotNOG,0PFF0@fuNOG,12NTZ@opiNOG,158B1@pleNOG,COG0443@NOG,KOG0104@euNOG	NA|NA|NA	O	Hsp70 protein
tF05993	573729.XP_003664669.1	5.6e-82	310.1	SUB7	GO:0000322,GO:0000323,GO:0000324,GO:0000328,GO:0003674,GO:0003824,GO:0004175,GO:0004252,GO:0005575,GO:0005576,GO:0005622,GO:0005623,GO:0005737,GO:0005773,GO:0005775,GO:0007039,GO:0008150,GO:0008152,GO:0008233,GO:0008236,GO:0009056,GO:0009057,GO:0009987,GO:0010467,GO:0016485,GO:0016787,GO:0017171,GO:0019538,GO:0030163,GO:0031974,GO:0043170,GO:0043226,GO:0043227,GO:0043229,GO:0043231,GO:0043233,GO:…	K01336		fuNOG[21]	03NC6@ascNOG,0CTYQ@chaNOG,0PGE1@fuNOG,13IFF@opiNOG,19V6I@sordNOG,1ADR2@sorNOG,COG1404@NOG,KOG1153@euNOG	NA|NA|NA	O	Peptidase inhibitor I9
tF06084	5022.CBX95814	3.9e-227	793.1			K15920		fuNOG[21]	03NH1@ascNOG,0H4PQ@dotNOG,0IE0I@euNOG,0PJ69@fuNOG,12SYG@opiNOG,15DCJ@pleNOG,COG1472@NOG	NA|NA|NA	G	Fn3_like
tF06086	36630.CADNFIAP00003916	3.5e-18	97.1	FG03123.1	GO:0005575,GO:0005576			fuNOG[21]	03UGS@ascNOG,0J0YN@euNOG,0M94R@euroNOG,0MPE8@eurotNOG,0PRFZ@fuNOG,0YS83@NOG,13VEW@opiNOG	NA|NA|NA	S	antigenic cell wall galactomannoprotein
tF06121	13684.SNOT_06040	5.8e-151	539.3	PGUG_02940				fuNOG[21]	03PYJ@ascNOG,0H9WW@dotNOG,0IKU5@euNOG,0PMEJ@fuNOG,12PX3@opiNOG,15E5M@pleNOG,COG3386@NOG	NA|NA|NA	G	Major royal jelly protein
tF06126	861557.XP_003299139.1	3.7e-46	191	FG08506.1				fuNOG[21]	03SP1@ascNOG,0H8QW@dotNOG,0IZNR@euNOG,0PPQG@fuNOG,0YEPT@NOG,13TMJ@opiNOG,15AJM@pleNOG	NA|NA|NA	S	Inherit from ascNOG: Conserved hypothetical protein
tF06227	426418.XP_001938701.1	1.6e-119	434.9	PGUG_04244	GO:0000003,GO:0005575,GO:0005622,GO:0005623,GO:0005737,GO:0005739,GO:0005783,GO:0005886,GO:0006139,GO:0006259,GO:0006310,GO:0006725,GO:0006807,GO:0007049,GO:0007126,GO:0007127,GO:0007131,GO:0008150,GO:0008152,GO:0009987,GO:0016020,GO:0022402,GO:0034641,GO:0035825,GO:0043170,GO:0043226,GO:0043227,GO:0043229,GO:0043231,GO:0044237,GO:0044238,GO:0044260,GO:0044424,GO:0044444,GO:0044464,GO:0044699,GO:…			fuNOG[21]	03PCQ@ascNOG,0H6QY@dotNOG,0IGCG@euNOG,0PKXI@fuNOG,11M7X@NOG,12TCJ@opiNOG,157HE@pleNOG	NA|NA|NA	S	Putative stress-responsive nuclear envelope protein
tF06275	500485.XP_002562818.1	3.5e-243	846.3		GO:0005575,GO:0005576			fuNOG[21]	03IAX@ascNOG,0IF3E@euNOG,0MDQX@euroNOG,0MIQE@eurotNOG,0PHIS@fuNOG,0XPKX@NOG,12Q6P@opiNOG	NA|NA|NA	S	Glutaminase GtaA
tF06308	502779.XP_002790248.1	2.4e-18	98.2					fuNOG[21]	0408S@ascNOG,0JDEM@euNOG,0M8YP@euroNOG,0PXV5@fuNOG,0Z2YJ@NOG,12I07@onyNOG,146QU@opiNOG	NA|NA|NA	S	Blastomyces yeast-phase-specific protein
tF06351	578455.XP_003655234.1	3e-43	181.4	SET5	GO:0000228,GO:0000785,GO:0000790,GO:0003674,GO:0003824,GO:0005575,GO:0005622,GO:0005623,GO:0005634,GO:0005694,GO:0005737,GO:0006325,GO:0006464,GO:0006479,GO:0006996,GO:0008150,GO:0008152,GO:0008168,GO:0008213,GO:0008757,GO:0009987,GO:0016043,GO:0016568,GO:0016569,GO:0016570,GO:0016571,GO:0016740,GO:0016741,GO:0019538,GO:0031974,GO:0031981,GO:0032259,GO:0034968,GO:0036211,GO:0043170,GO:0043226,GO:…	K07117,K11426		fuNOG[21]	03JW4@ascNOG,0CVW5@chaNOG,0PGYB@fuNOG,12PHP@opiNOG,19UT7@sordNOG,1A8MF@sorNOG,COG2940@NOG,KOG2084@euNOG	NA|NA|NA	B	SET
tF06356	861557.XP_003301154.1	2.8e-221	773.5	FG00259.1	GO:0000322,GO:0000323,GO:0000324,GO:0005575,GO:0005576,GO:0005622,GO:0005623,GO:0005737,GO:0005773,GO:0005829,GO:0043226,GO:0043227,GO:0043229,GO:0043231,GO:0044424,GO:0044444,GO:0044464			fuNOG[21]	03JQK@ascNOG,0H6EI@dotNOG,0PHZS@fuNOG,12QK0@opiNOG,159FS@pleNOG,COG0737@NOG,KOG4419@euNOG	NA|NA|NA	F	Calcineurin-like phosphoesterase
tF06426	162425.CADANIAP00001884	1.1e-168	598.6			K01210		fuNOG[21]	03QCH@ascNOG,0IVS5@euNOG,0MARP@euroNOG,0MKZJ@eurotNOG,0PK3X@fuNOG,0XNSB@NOG,12S0T@opiNOG	NA|NA|NA	G	Inherit from ascNOG: glycoside hydrolase family 55 protein
tF06447	162425.CADANIAP00004131	2.1e-176	624	FG06612.1				fuNOG[21]	03NC9@ascNOG,0IFDS@euNOG,0MCF5@euroNOG,0MMTM@eurotNOG,0PKN9@fuNOG,13HDG@opiNOG,COG2140@NOG	NA|NA|NA	G	Oxalate decarboxylase
tF06469	33178.CADATEAP00003889	2.8e-120	437.2					fuNOG[21]	03T81@ascNOG,0MCKH@euroNOG,0MS3H@eurotNOG,0PPX6@fuNOG,13SZC@opiNOG,COG1957@NOG,KOG2938@euNOG	NA|NA|NA	F	Inosine-uridine preferring nucleoside hydrolase
tF06492	1047171.EFQ25820	2.4e-146	524.2	FG11020.1		K01426		fuNOG[21]	03MPI@ascNOG,0H40V@dotNOG,0PIP8@fuNOG,12RPS@opiNOG,COG0154@NOG,KOG1211@euNOG	NA|NA|NA	J	Amidase
tF06504	578455.XP_003656356.1	7.7e-236	822	FGSG_05622		K01194		fuNOG[21]	03WT9@ascNOG,0CSAD@chaNOG,0PGYP@fuNOG,12PIH@opiNOG,19W7Y@sordNOG,1A8CN@sorNOG,COG1626@NOG,KOG0602@euNOG	NA|NA|NA	G	Glycoside hydrolase family 37 protein
tF06556	229533.XP_382792.1	4.5e-63	246.9	FG02616.1				fuNOG[21]	03P61@ascNOG,0IVRN@euNOG,0PKMB@fuNOG,0SFXU@hypNOG,0WZ4E@necNOG,0ZVVU@NOG,13I6H@opiNOG,19IYF@sordNOG	NA|NA|NA	S	Putative lysophospholipase
tF06557	13684.SNOT_02157	3.5e-197	693.3	FG08126.1	GO:0000271,GO:0003674,GO:0003824,GO:0004553,GO:0004573,GO:0005575,GO:0005622,GO:0005623,GO:0005737,GO:0005783,GO:0005788,GO:0005975,GO:0005976,GO:0006464,GO:0006486,GO:0006487,GO:0008150,GO:0008152,GO:0009058,GO:0009059,GO:0009100,GO:0009101,GO:0009987,GO:0015926,GO:0016051,GO:0016787,GO:0016798,GO:0017177,GO:0019538,GO:0031974,GO:0032991,GO:0034645,GO:0036211,GO:0043170,GO:0043226,GO:0043227,GO:…	K08288		fuNOG[21]	03KAB@ascNOG,0H6AE@dotNOG,0PG93@fuNOG,0XPE3@NOG,12S59@opiNOG,157QU@pleNOG,KOG2397@euNOG	NA|NA|NA	T	Glucosidase II beta subunit-like protein
tF06592	13684.SNOT_00848	1.4e-48	197.6	FPR2	GO:0000413,GO:0003674,GO:0003755,GO:0003824,GO:0005488,GO:0005527,GO:0005528,GO:0005575,GO:0005622,GO:0005623,GO:0005634,GO:0005737,GO:0005783,GO:0005788,GO:0005789,GO:0006457,GO:0006464,GO:0008144,GO:0008150,GO:0008152,GO:0009987,GO:0012505,GO:0016020,GO:0016853,GO:0016859,GO:0018193,GO:0018208,GO:0019538,GO:0031090,GO:0031974,GO:0036211,GO:0042175,GO:0043170,GO:0043226,GO:0043227,GO:0043229,GO:…	K09569,K09577		fuNOG[21]	03RZZ@ascNOG,0H7ZP@dotNOG,0PQY3@fuNOG,13V3H@opiNOG,15C41@pleNOG,COG0545@NOG,KOG0549@euNOG	NA|NA|NA	O	peptidyl-prolyl cis-trans isomerase
tF06618	40559.EDN18198	4.5e-130	469.9	EXG1	GO:0000003,GO:0000935,GO:0003006,GO:0003674,GO:0003824,GO:0004338,GO:0004553,GO:0005575,GO:0005576,GO:0005618,GO:0005619,GO:0005623,GO:0005975,GO:0005976,GO:0006073,GO:0007049,GO:0008150,GO:0008152,GO:0008422,GO:0009272,GO:0009277,GO:0009653,GO:0009987,GO:0010383,GO:0015926,GO:0016043,GO:0016787,GO:0016798,GO:0019953,GO:0022402,GO:0022413,GO:0022414,GO:0030154,GO:0030312,GO:0030428,GO:0030435,GO:…	K01210	13BGHe	fuNOG[21]	03NXA@ascNOG,0IHBU@euNOG,0PJVJ@fuNOG,12TM3@opiNOG,COG2730@NOG	NA|NA|NA	G	Glucan 1,3-beta-glucosidase
tF06636	5022.CBY00417	3.9e-15	87.4					fuNOG[21]	04C5N@ascNOG,0HBGG@dotNOG,0IMC4@euNOG,0QD5V@fuNOG,111VA@NOG,139NH@opiNOG,15DST@pleNOG	NA|NA|NA
tF06650	5061.CADANGAP00009817	2.7e-198	697.6	FGSG_11170				fuNOG[21]	03PS7@ascNOG,0IGZ4@euNOG,0PKQP@fuNOG,0XS6V@NOG,13FSY@opiNOG	NA|NA|NA	G	Inherit from NOG: Glycoside hydrolase family 78 protein
tF06651	426418.XP_001931919.1	2.6e-21	109					fuNOG[21]	03VPE@ascNOG,0H923@dotNOG,0J8IK@euNOG,0PTQH@fuNOG,0XWQK@NOG,13YYP@opiNOG,15B50@pleNOG	NA|NA|NA	S	Inherit from NOG: Conserved hypothetical, protein
tF06693	861557.XP_003299124.1	1.1e-32	146.7					fuNOG[21]	04CEI@ascNOG,0HAVN@dotNOG,0IM3Y@euNOG,0QCXB@fuNOG,1122U@NOG,139XH@opiNOG,15DTK@pleNOG	NA|NA|NA
tF06729	5059.CADAFLAP00003133	0	1265	LACC	GO:0005575,GO:0005576			fuNOG[21]	03WFS@ascNOG,0PGTY@fuNOG,12QYB@opiNOG,COG1874@NOG,KOG0496@euNOG	NA|NA|NA	G	Cleaves beta-linked terminal galactosyl residues from gangliosides, glycoproteins, and glycosaminoglycans (By similarity)
tF06764	148305.A4RET5	2.3e-78	298.5		GO:0003674,GO:0003824,GO:0004497,GO:0005488,GO:0005506,GO:0008150,GO:0008152,GO:0016491,GO:0020037,GO:0043167,GO:0043169,GO:0044710,GO:0046872,GO:0046906,GO:0046914,GO:0055114,GO:0097159,GO:1901363			fuNOG[21]	03PK9@ascNOG,0IVSH@euNOG,0PM02@fuNOG,0UAJ5@magNOG,0ZIU8@NOG,13KGJ@opiNOG,19JQW@sordNOG	NA|NA|NA	Q	Cytochrome P450
tF06796	5085.CADAFUBP00000557	1.9e-116	424.9	FG09362.1	GO:0005575,GO:0005622,GO:0005623,GO:0005737,GO:0005783,GO:0005788,GO:0031974,GO:0043226,GO:0043227,GO:0043229,GO:0043231,GO:0043233,GO:0044422,GO:0044424,GO:0044432,GO:0044444,GO:0044446,GO:0044464,GO:0070013	K01829,K09584		euNOG[57]	COG0526@NOG,KOG0191@euNOG	NA|NA|NA	O	Protein disulfide isomerase
tF06859	526221.XP_003008092.1	1.4e-19	101.3					fuNOG[21]	03TH7@ascNOG,0J218@euNOG,0PRNM@fuNOG,12CRG@NOG,13VN2@opiNOG	NA|NA|NA
tF06863	13684.SNOT_12388	3.7e-28	133.3					fuNOG[21]	04C7C@ascNOG,0HBCC@dotNOG,0IMAM@euNOG,0QD49@fuNOG,111WQ@NOG,139Q6@opiNOG,15DXK@pleNOG	NA|NA|NA
tF06866	554155.XP_002848370.1	2.5e-216	756.9	PGUG_00354	GO:0005575,GO:0005576,GO:0005622,GO:0005623,GO:0005737,GO:0005783,GO:0005789,GO:0008150,GO:0009405,GO:0012505,GO:0016020,GO:0016021,GO:0031090,GO:0031224,GO:0042175,GO:0043226,GO:0043227,GO:0043229,GO:0043231,GO:0044422,GO:0044424,GO:0044425,GO:0044432,GO:0044444,GO:0044446,GO:0044464,GO:0051704	K09704		fuNOG[21]	02YXW@arthNOG,03NP4@ascNOG,0IFJ3@euNOG,0M7GR@euroNOG,0PFTS@fuNOG,12GR9@onyNOG,12P3V@opiNOG,COG3538@NOG	NA|NA|NA	S	Protein of unknown function (DUF1237)
tF06877	29760.VIT_03s0063g00020.t01	3.6e-71	274.2					virNOG[6]	0IVBA@euNOG,0YFAF@NOG,1BFQ4@strNOG,1DT0U@virNOG	NA|NA|NA	S	Inherit from COG: leucine Rich Repeat
tF06883	13684.SNOT_10786	1.2e-166	592.4	FZO1	GO:0003674,GO:0003824,GO:0003924,GO:0005488,GO:0005515,GO:0005575,GO:0005622,GO:0005623,GO:0005737,GO:0005739,GO:0005740,GO:0005741,GO:0006139,GO:0006152,GO:0006163,GO:0006184,GO:0006195,GO:0006725,GO:0006753,GO:0006793,GO:0006796,GO:0006807,GO:0006944,GO:0006996,GO:0007005,GO:0008053,GO:0008150,GO:0008152,GO:0009056,GO:0009116,GO:0009117,GO:0009119,GO:0009141,GO:0009143,GO:0009144,GO:0009146,GO:…	K06030		fuNOG[21]	03KQY@ascNOG,0H6WF@dotNOG,0PHSB@fuNOG,12SWB@opiNOG,1589T@pleNOG,COG0699@NOG,COG5540@NOG,KOG0448@euNOG,KOG0828@euNOG	NA|NA|NA	O	Dynamin family
tF06954	5059.CADAFLAP00004050	2.7e-143	514.2					fuNOG[21]	03MWW@ascNOG,0IJFV@euNOG,0PHWY@fuNOG,0XPUV@NOG,13KXY@opiNOG	NA|NA|NA	S	Arylsulfotransferase (ASST)
tF06963	13684.SNOT_01844	1.5e-197	694.5			K00102		NOG[107]	COG0277@NOG	NA|NA|NA	C	FAD linked oxidase domain protein
tF06965	40559.EDN19587	2.9e-74	285.4					fuNOG[21]	03JNP@ascNOG,0PFGF@fuNOG,12S4K@opiNOG,COG2303@NOG,KOG1238@euNOG	NA|NA|NA	E	GMC oxidoreductase
tF06980	40559.EDN25139	2.6e-75	288.1	FG01390.1	GO:0005575,GO:0005576			fuNOG[21]	03Q7A@ascNOG,0PMT5@fuNOG,0XNV7@NOG,13PKI@opiNOG,KOG1339@euNOG	NA|NA|NA	O	Eukaryotic aspartyl protease
tF07000	36630.CADNFIAP00003116	1.5e-64	251.9		GO:0005575,GO:0005576			fuNOG[21]	043D6@ascNOG,0JAVC@euNOG,0ME2Y@euroNOG,0MRKZ@eurotNOG,0PVBI@fuNOG,0Y5I0@NOG,142JF@opiNOG	NA|NA|NA
tF07048	36630.CADNFIAP00004151	0	1078.5					fuNOG[21]	03M81@ascNOG,0IJ80@euNOG,0M5MK@euroNOG,0MK58@eurotNOG,0PM7C@fuNOG,13M5D@opiNOG,COG3537@NOG	NA|NA|NA	G	subfamily
tF07073	426418.XP_001940205.1	1e-76	292	FG04647.1				fuNOG[21]	03S7Y@ascNOG,0H65Z@dotNOG,0IX7V@euNOG,0PPAV@fuNOG,11IZS@NOG,13RT5@opiNOG,157JF@pleNOG	NA|NA|NA	S	Protein of unknown function (DUF3129)
tF07079	426418.XP_001939949.1	3.6e-110	404.1	FG03366.1				fuNOG[21]	03QDG@ascNOG,0H66Z@dotNOG,0PJUZ@fuNOG,11FS8@NOG,12UE1@opiNOG,158MZ@pleNOG,KOG1382@euNOG	NA|NA|NA	S	Pfam:Acid_phosphat_A
tF07081	5061.CADANGAP00000435	1.8e-95	354.8		GO:0000272,GO:0003674,GO:0003824,GO:0004553,GO:0005975,GO:0005976,GO:0008150,GO:0008152,GO:0009056,GO:0009057,GO:0009251,GO:0016052,GO:0016787,GO:0016798,GO:0042972,GO:0043170,GO:0044042,GO:0044238,GO:0071704,GO:1901575			fuNOG[21]	03PTE@ascNOG,0IIRU@euNOG,0M7M3@euroNOG,0PK1Z@fuNOG,11FI3@NOG,13ABB@opiNOG	NA|NA|NA	G	endo-1,3(4)-beta-glucanase
tF07203	5022.CBX92990	1.3e-69	270					fuNOG[21]	04CYI@ascNOG,0H9MA@dotNOG,0KQVX@euNOG,0QCDY@fuNOG,112IA@NOG,13AFI@opiNOG,159KG@pleNOG	NA|NA|NA	S	Domain of unknown function (DUF1996)
tF07222	502779.XP_002792818.1	1.8e-155	555.1					fuNOG[21]	03PCX@ascNOG,0IIZ2@euNOG,0M7CY@euroNOG,0PI2B@fuNOG,11F57@NOG,12J11@onyNOG,13N97@opiNOG	NA|NA|NA	S	Putative glycosyl hydrolase of unknown function (DUF1680)
tF07245	500485.XP_002560481.1	3.8e-237	826.2	GLAA	GO:0000003,GO:0000272,GO:0000322,GO:0000323,GO:0000324,GO:0003006,GO:0003674,GO:0003824,GO:0004339,GO:0004553,GO:0005575,GO:0005622,GO:0005623,GO:0005628,GO:0005737,GO:0005773,GO:0005783,GO:0005794,GO:0005975,GO:0005976,GO:0005977,GO:0005980,GO:0006073,GO:0006091,GO:0006112,GO:0007049,GO:0008150,GO:0008152,GO:0009056,GO:0009057,GO:0009251,GO:0009653,GO:0009986,GO:0009987,GO:0015926,GO:0015980,GO:…	K01178		fuNOG[21]	03NKF@ascNOG,0IGG8@euNOG,0M3J6@euroNOG,0MIU5@eurotNOG,0PJ6P@fuNOG,12SF0@opiNOG,COG3387@NOG	NA|NA|NA	G	glucan 1,4-alpha-glucosidase
tF07247	5061.CADANGAP00009975	4.3e-50	203.8	FG01982.1				fuNOG[21]	03MFK@ascNOG,0IHTS@euNOG,0PIXU@fuNOG,12U8W@opiNOG,COG3485@NOG	NA|NA|NA	Q	Extracellular dioxygenase
tF07260	1047171.EFQ35706	1.7e-83	314.7			K01224		fuNOG[21]	03YK8@ascNOG,0IFS4@euNOG,0PV72@fuNOG,1431M@opiNOG,COG3867@NOG	NA|NA|NA	G	Glycosyl hydrolase family 53
tF07264	861557.XP_003302013.1	4.1e-83	313.9					fuNOG[21]	03MW6@ascNOG,0HB6S@dotNOG,0IEIG@euNOG,0PHVY@fuNOG,0YBX6@NOG,13NPY@opiNOG,157WV@pleNOG	NA|NA|NA	S	Protein of unknown function (DUF3431)
tF07289	1047171.EFQ36273	1.2e-177	628.6	FG03742.1		K19069		fuNOG[21]	03KES@ascNOG,0H63B@dotNOG,0PHG9@fuNOG,12Q3U@opiNOG,COG2303@NOG,KOG1238@euNOG	NA|NA|NA	E	FAD binding domain
tF07329	5022.CBX96217	0	1066.6	KAR2	GO:0000003,GO:0000166,GO:0000741,GO:0000742,GO:0000746,GO:0000747,GO:0000974,GO:0001882,GO:0001883,GO:0003674,GO:0003824,GO:0005488,GO:0005515,GO:0005524,GO:0005575,GO:0005576,GO:0005622,GO:0005623,GO:0005634,GO:0005635,GO:0005730,GO:0005737,GO:0005783,GO:0005788,GO:0005794,GO:0006139,GO:0006152,GO:0006163,GO:0006195,GO:0006200,GO:0006355,GO:0006457,GO:0006458,GO:0006508,GO:0006511,GO:0006605,GO:…	K09490		fuNOG[21]	03K33@ascNOG,0H3PS@dotNOG,0PH5U@fuNOG,12PIY@opiNOG,15DJ2@pleNOG,COG0443@NOG,KOG0101@euNOG	NA|NA|NA	O	MreB/Mbl protein
tF07368	29875.EHK21970	9.4e-44	181.8					fuNOG[21]	03MZA@ascNOG,0PHWZ@fuNOG,0SE0C@hypNOG,0XS7T@NOG,13MZ5@opiNOG,19JMW@sordNOG,KOG3178@euNOG	NA|NA|NA	S	O-methyltransferase
tF07411	5022.CBY00548	1.1e-201	708.4	SED4	GO:0003674,GO:0003824,GO:0004177,GO:0005575,GO:0005576,GO:0005615,GO:0005618,GO:0005623,GO:0006508,GO:0008150,GO:0008152,GO:0008233,GO:0008238,GO:0009277,GO:0016787,GO:0019538,GO:0030312,GO:0030428,GO:0034701,GO:0043170,GO:0044238,GO:0044421,GO:0044464,GO:0045148,GO:0070011,GO:0071704,GO:0071944	K01279		fuNOG[21]	03Q1Z@ascNOG,0H6GJ@dotNOG,0IICY@euNOG,0PI5I@fuNOG,13I7B@opiNOG,158PS@pleNOG,COG4934@NOG	NA|NA|NA	O	Pro-kumamolisin, activation domain
tF07416	13684.SNOT_11248	4.2e-249	866.3	FG09085.1	GO:0005575,GO:0005576	K19069		fuNOG[21]	03P71@ascNOG,0H6VY@dotNOG,0IUIF@euNOG,0PK4V@fuNOG,13HSA@opiNOG,157HR@pleNOG,COG2303@NOG	NA|NA|NA	E	GMC oxidoreductase
tF07425	13684.SNOT_10974	2.9e-48	197.6		GO:0005575,GO:0005576			fuNOG[21]	03NJG@ascNOG,0HBEW@dotNOG,0IG3Q@euNOG,0PKH3@fuNOG,0XSXM@NOG,13N17@opiNOG,158C4@pleNOG	NA|NA|NA	S	Inherit from ascNOG: Conserved hypothetical protein
tF07474	33178.CADATEAP00006176	1.7e-15	89	FG08903.1				fuNOG[21]	03ZVD@ascNOG,0JD05@euNOG,0PXHJ@fuNOG,0Z7XV@NOG,14536@opiNOG	NA|NA|NA
tF07484	140110.NechaP80111	2.4e-75	288.5					fuNOG[21]	03WN0@ascNOG,0JB0U@euNOG,0PUFM@fuNOG,1004C@NOG,1429W@opiNOG,19QSQ@sordNOG	NA|NA|NA
tF07494	861557.XP_003301612.1	1.9e-06	60.1					fuNOG[21]	041RI@ascNOG,0HABB@dotNOG,0JHGR@euNOG,0PZX5@fuNOG,0ZBXB@NOG,14ESJ@opiNOG,15AYB@pleNOG	NA|NA|NA
tF07518	5022.CBX92259	1.9e-171	608.6	FG10234.1				fuNOG[21]	03P5G@ascNOG,0H5R9@dotNOG,0IG8S@euNOG,0PKQJ@fuNOG,0ZSAG@NOG,13FE6@opiNOG,15DD9@pleNOG	NA|NA|NA	S	Inherit from dotNOG: Fungal domain of unknown function (DUF1712)
tF07554	426418.XP_001939323.1	1.9e-61	241.9	FG01153.1				fuNOG[21]	03UGA@ascNOG,0H8WZ@dotNOG,0J1FY@euNOG,0PRC8@fuNOG,11UD7@NOG,13W3N@opiNOG,15DJA@pleNOG	NA|NA|NA
tF07560	5057.CADACLAP00001672	2.1e-21	108.6		GO:0005575,GO:0005576			fuNOG[21]	03U1W@ascNOG,0PRT6@fuNOG,13VDJ@opiNOG,COG2340@NOG,KOG3017@euNOG	NA|NA|NA	S	SCP-like extracellular protein
tF07570	426418.XP_001935262.1	1.6e-42	179.9					fuNOG[21]	040NN@ascNOG,0H998@dotNOG,0JFZB@euNOG,0PYV6@fuNOG,0YZYV@NOG,14827@opiNOG,15987@pleNOG	NA|NA|NA
tF07602	40559.EDN31956	9.4e-122	442.2	FG11350.1	GO:0007275,GO:0008150,GO:0032501,GO:0032502,GO:0043581,GO:0044699,GO:0044707,GO:0044767,GO:0048856			fuNOG[21]	03NR7@ascNOG,0IVGU@euNOG,0PMGB@fuNOG,0XQXY@NOG,12SIS@opiNOG	NA|NA|NA	S	Inherit from NOG: exported protein
tF07607	162425.CADANIAP00005590	4.6e-80	303.9					fuNOG[21]	04EA8@ascNOG,0J88E@euNOG,0ME6V@euroNOG,0MI8Q@eurotNOG,0QEGN@fuNOG,11MZ4@NOG,13H3P@opiNOG	NA|NA|NA	S	Inherit from euNOG: Fringe-like
tF07609	1047171.EFQ34458	1.6e-16	92.4					fuNOG[21]	03RMF@ascNOG,0H728@dotNOG,0IWY2@euNOG,0PNNR@fuNOG,11I53@NOG,13QXD@opiNOG	NA|NA|NA
tF07614	33178.CADATEAP00007106	1.7e-62	246.1					fuNOG[21]	03JUS@ascNOG,0IKVS@euNOG,0MEV6@euroNOG,0MPTQ@eurotNOG,0PIPY@fuNOG,0ZQF3@NOG,12VSQ@opiNOG	NA|NA|NA	S	Protein of unknown function (DUF3405)
tF07693	40559.EDN21791	2.9e-99	368.2	FG05628.1		K00505		fuNOG[21]	03N4H@ascNOG,0II4U@euNOG,0PJ62@fuNOG,0ZDKU@NOG,13MKU@opiNOG	NA|NA|NA	S	tyrosinase
tF07713	208348.PTTG_09654P0	6.4e-13	80.1					fuNOG[21]	09444@basNOG,0J29U@euNOG,0PRZN@fuNOG,12AAG@NOG,13W8Y@opiNOG	NA|NA|NA	S	Rare lipoprotein A (RlpA)-like double-psi beta-barrel
tF07727	40559.EDN27217	1.6e-77	295		GO:0003674,GO:0003824,GO:0005575,GO:0005622,GO:0005623,GO:0005737,GO:0005783,GO:0005794,GO:0005975,GO:0006464,GO:0006486,GO:0006487,GO:0008150,GO:0008152,GO:0008194,GO:0008375,GO:0009058,GO:0009059,GO:0009100,GO:0009101,GO:0009987,GO:0016740,GO:0016757,GO:0016758,GO:0019538,GO:0034645,GO:0036211,GO:0043170,GO:0043226,GO:0043227,GO:0043229,GO:0043231,GO:0043412,GO:0043413,GO:0044237,GO:0044238,GO:…			fuNOG[21]	03V26@ascNOG,0PS8C@fuNOG,13Y05@opiNOG,COG5597@NOG,KOG1950@euNOG	NA|NA|NA	G	glycosyl transferase family 8 family
tF07749	861557.XP_003301118.1	2.5e-145	520.8					fuNOG[21]	03QCY@ascNOG,0H383@dotNOG,0IIKE@euNOG,0PKK0@fuNOG,0XS3S@NOG,131Q6@opiNOG,15DGY@pleNOG	NA|NA|NA	G	Glycosyl hydrolases family 43
tF07764	13684.SNOT_08697	5.4e-113	413.3		GO:0005575,GO:0005576	K06004		fuNOG[21]	03ICX@ascNOG,0H4CZ@dotNOG,0PHZY@fuNOG,0XNV7@NOG,12SHD@opiNOG,1587E@pleNOG,KOG1339@euNOG	NA|NA|NA	O	Eukaryotic aspartyl protease
tF07813	148305.A4RII4	1.1e-117	429.9					fuNOG[21]	03Y7H@ascNOG,0J9Q9@euNOG,0PUW2@fuNOG,142SU@opiNOG,COG1404@NOG	NA|NA|NA	O	Subtilase family
tF07822	441959.XP_002486322.1	9e-71	272.3		GO:0000272,GO:0003674,GO:0003824,GO:0005975,GO:0005976,GO:0008126,GO:0008150,GO:0008152,GO:0009056,GO:0009057,GO:0010393,GO:0016052,GO:0016787,GO:0016788,GO:0034338,GO:0043170,GO:0044238,GO:0045488,GO:0045490,GO:0046575,GO:0052689,GO:0071704,GO:1901575	K15530		fuNOG[21]	03S3U@ascNOG,0IXE9@euNOG,0MDGH@euroNOG,0MHXJ@eurotNOG,0PNVV@fuNOG,13RVE@opiNOG,COG2755@NOG	NA|NA|NA	E	Rhamnogalacturonan acetylesterase
tF07849	336963.XP_002542228.1	1.8e-28	132.1	FG00028.1	GO:0005575,GO:0005576,GO:0008150,GO:0044046,GO:0044403,GO:0044419,GO:0051701,GO:0051704,GO:0052047,GO:0052048,GO:0052051,GO:0052211			NOG[107]	0XPH7@NOG	NA|NA|NA	S	metallo-protease
tF07850	573729.XP_003662375.1	5.7e-25	120.6	FG00028.1	GO:0003674,GO:0003824,GO:0005575,GO:0005576,GO:0008150,GO:0008152,GO:0008233,GO:0008237,GO:0016787,GO:0044046,GO:0044403,GO:0044419,GO:0051701,GO:0051704,GO:0052047,GO:0052048,GO:0052051,GO:0052211,GO:0070011	K07762		fuNOG[21]	03M8D@ascNOG,0CWF7@chaNOG,0IFMM@euNOG,0PIAE@fuNOG,0XPH7@NOG,1300I@opiNOG,19PI8@sordNOG,1AAPE@sorNOG	NA|NA|NA	O	Pregnancy-associated plasma protein-A
tF07853	29875.EHK22612	1.1e-23	115.9	FG00028.1	GO:0003674,GO:0003824,GO:0005575,GO:0005576,GO:0008150,GO:0008152,GO:0008233,GO:0008237,GO:0016787,GO:0044046,GO:0044403,GO:0044419,GO:0051701,GO:0051704,GO:0052047,GO:0052048,GO:0052051,GO:0052211,GO:0070011	K07762		fuNOG[21]	03M8D@ascNOG,0IFMM@euNOG,0PIAE@fuNOG,0SCMB@hypNOG,0XPH7@NOG,1300I@opiNOG,1A3WT@sordNOG	NA|NA|NA	O	to metalloprotease 1 precursor
tF07856	13684.SNOT_13054	3e-155	554.7	FG09237.1				fuNOG[21]	03K6T@ascNOG,0H39W@dotNOG,0IGBE@euNOG,0PH6C@fuNOG,1223R@NOG,12PW0@opiNOG,1580P@pleNOG	NA|NA|NA	S	Activator of mitotic machinery Cdc14 phosphatase activation C-term
tF07865	13684.SNOT_09546	2.3e-283	980.3	FG00261.1	GO:0005575,GO:0005622,GO:0005623,GO:0005737,GO:0005783,GO:0005789,GO:0006457,GO:0008150,GO:0008152,GO:0009987,GO:0012505,GO:0016020,GO:0016021,GO:0019538,GO:0030176,GO:0031090,GO:0031224,GO:0031227,GO:0031300,GO:0031301,GO:0032991,GO:0034975,GO:0042175,GO:0043170,GO:0043226,GO:0043227,GO:0043229,GO:0043231,GO:0043234,GO:0044237,GO:0044238,GO:0044260,GO:0044267,GO:0044422,GO:0044424,GO:0044425,GO:…			fuNOG[21]	03JZU@ascNOG,0H3RD@dotNOG,0PIW9@fuNOG,0XPCR@NOG,12PEE@opiNOG,15ANE@pleNOG,KOG2103@euNOG	NA|NA|NA	S	Protein of unknown function (DUF1620)
tF07883	140110.NechaP92582	2.2e-81	307.4	FG06017.1	GO:0005575,GO:0005576			fuNOG[21]	03RFH@ascNOG,0IWF2@euNOG,0PNF2@fuNOG,0SD21@hypNOG,0WXZX@necNOG,11GQ0@NOG,13PX5@opiNOG,19IUW@sordNOG	NA|NA|NA	S	Necrosis inducing protein (NPP1)
tF07885	861557.XP_003306277.1	1.4e-99	368.2	FG05629.1				fuNOG[21]	03UYT@ascNOG,0H3AX@dotNOG,0J31N@euNOG,0PSJI@fuNOG,12461@NOG,13WE0@opiNOG	NA|NA|NA	S	Inherit from euNOG: Conserved hypothetical protein
tF07910	5022.CBX95749	8.9e-88	329.7			K01336		fuNOG[21]	03YN0@ascNOG,0HB6M@dotNOG,0PVRE@fuNOG,140XB@opiNOG,158AG@pleNOG,COG1404@NOG,KOG1153@euNOG	NA|NA|NA	O	Subtilase family
tF07928	426418.XP_001940336.1	5.8e-157	559.7	FG01603.1	GO:0003674,GO:0003824,GO:0004091,GO:0008150,GO:0008152,GO:0016787,GO:0016788,GO:0052689			fuNOG[21]	03NC2@ascNOG,0H4MA@dotNOG,0PJPI@fuNOG,13JAK@opiNOG,15AJZ@pleNOG,COG2272@NOG,KOG4389@euNOG	NA|NA|NA	T	Carboxylesterase family
tF07948	441959.XP_002486144.1	4.4e-251	872.8			K01206		fuNOG[21]	03KSB@ascNOG,0MDK3@euroNOG,0MRZS@eurotNOG,0PG9E@fuNOG,12PTY@opiNOG,COG3669@NOG,KOG3340@euNOG	NA|NA|NA	G	Alpha_L_fucos
tF07949	1047171.EFQ25100	1e-74	285.4	FG03713.1	GO:0000272,GO:0003674,GO:0003824,GO:0005575,GO:0005576,GO:0005975,GO:0005976,GO:0008150,GO:0008152,GO:0009056,GO:0009057,GO:0010393,GO:0016052,GO:0016829,GO:0016835,GO:0016837,GO:0030570,GO:0043170,GO:0044238,GO:0045488,GO:0045490,GO:0071704,GO:1901575			fuNOG[21]	03RJX@ascNOG,0IVZ1@euNOG,0PN9G@fuNOG,0ZIM0@NOG,13PWD@opiNOG	NA|NA|NA	G	Pectate lyase
tF07960	1047171.EFQ27320	2.5e-136	491.1					fuNOG[21]	03PN2@ascNOG,0H51E@dotNOG,0PKJZ@fuNOG,134BA@opiNOG,COG2272@NOG,KOG1516@euNOG	NA|NA|NA	I	Carboxylesterase family
tF07966	573729.XP_003665295.1	7e-67	259.6					fuNOG[21]	03Z2E@ascNOG,0CR8V@chaNOG,0J7AA@euNOG,0PWTM@fuNOG,0Y5I0@NOG,144NR@opiNOG,19UQU@sordNOG,1AD39@sorNOG	NA|NA|NA
tF08029	5085.CADAFUBP00007626	3.1e-86	325.1					fuNOG[21]	043F3@ascNOG,0K0PU@euNOG,0MDYI@euroNOG,0MJNW@eurotNOG,0Q2PB@fuNOG,10AQM@NOG,14GQ2@opiNOG	NA|NA|NA	S	Arylsulfotransferase (ASST)
tF08045	861557.XP_003302463.1	5.3e-58	230.3					fuNOG[21]	03T9M@ascNOG,0H859@dotNOG,0IZ1N@euNOG,0PPWM@fuNOG,11Z6B@NOG,13TEN@opiNOG,15BYF@pleNOG	NA|NA|NA	S	Inherit from ascNOG: extracellular serine-rich protein
tF08097	535722.XP_003171118.1	1e-287	994.6	PGUG_04783				fuNOG[21]	02XE5@arthNOG,03KT9@ascNOG,0IGPT@euNOG,0M41U@euroNOG,0PI20@fuNOG,12JNZ@onyNOG,12PMB@opiNOG,COG3537@NOG	NA|NA|NA	G	Glycosyl hydrolase family 92
tF08146	578458.XP_003028589.1	6.9e-58	230.3			K08254		fuNOG[21]	0IKK7@euNOG,0PJGT@fuNOG,11H6V@NOG,13J6K@opiNOG	NA|NA|NA	G	hydrolase family 71 protein
tF08165	13684.SNOT_02312	1.2e-11	75.1					fuNOG[21]	041EQ@ascNOG,0H93B@dotNOG,0JKRI@euNOG,0Q008@fuNOG,0Z4TP@NOG,14BRG@opiNOG	NA|NA|NA
tF08189	5061.CADANGAP00010165	8.9e-152	542.7		GO:0001503,GO:0001505,GO:0001507,GO:0001540,GO:0001649,GO:0002076,GO:0003008,GO:0003674,GO:0003824,GO:0003990,GO:0004091,GO:0004104,GO:0005488,GO:0005515,GO:0005518,GO:0005575,GO:0005576,GO:0005578,GO:0005604,GO:0005605,GO:0005615,GO:0005622,GO:0005623,GO:0005634,GO:0005737,GO:0005783,GO:0005788,GO:0005794,GO:0005886,GO:0006066,GO:0006139,GO:0006259,GO:0006260,GO:0006576,GO:0006581,GO:0006629,GO:…			fuNOG[21]	03P8W@ascNOG,0PJV3@fuNOG,13N41@opiNOG,COG2272@NOG,KOG1516@euNOG	NA|NA|NA	I	Carboxylesterase family
tF08207	426418.XP_001930873.1	8.6e-58	229.2					fuNOG[21]	03XCE@ascNOG,0H7QQ@dotNOG,0J18F@euNOG,0PRJI@fuNOG,13VDB@opiNOG,15DXS@pleNOG,COG2755@NOG	NA|NA|NA	E	GDSL-like Lipase/Acylhydrolase
tF08209	559298.XP_002626608.1	1.3e-183	648.3			K01230		fuNOG[21]	03JZT@ascNOG,0MFT1@euroNOG,0PG1N@fuNOG,0XP04@NOG,12GNM@onyNOG,13J24@opiNOG,KOG2431@euNOG	NA|NA|NA	G	Class I alpha-mannosidase
tF08224	13684.SNOT_02018	9.8e-93	345.9	PEP1	GO:0005575,GO:0005576,GO:0006508,GO:0008150,GO:0008152,GO:0019538,GO:0043170,GO:0044238,GO:0071704	K01379,K06004		fuNOG[21]	03JP4@ascNOG,0H6GQ@dotNOG,0PH8I@fuNOG,0XNV7@NOG,12NU9@opiNOG,158EX@pleNOG,KOG1339@euNOG	NA|NA|NA	O	Secreted aspartic endopeptidase that allows assimilation of proteinaceous substrates. Can catalyze hydrolysis of the major structural proteins of basement membrane, elastin, collagen, and laminin
tF08230	1047171.EFQ34394	4.5e-169	599.7	FG02015.1				fuNOG[21]	03P9S@ascNOG,0H3I6@dotNOG,0PKHA@fuNOG,12RMA@opiNOG,COG2272@NOG,KOG4389@euNOG	NA|NA|NA	T	Carboxylesterase family
tF08239	40559.EDN26635	2.7e-296	1023.1	BGLG	GO:0005575,GO:0005576	K05349		fuNOG[21]	03KBT@ascNOG,0IF0P@euNOG,0PHDM@fuNOG,13F94@opiNOG,COG1472@NOG	NA|NA|NA	G	Beta-glucosidases are one of a number of cellulolytic enzymes involved in the degradation of cellulosic biomass. Catalyzes the last step releasing glucose from the inhibitory cellobiose (By similarity)
tF08275	36630.CADNFIAP00007568	6e-133	479.6	FG04689.1	GO:0000272,GO:0003674,GO:0003824,GO:0005575,GO:0005576,GO:0005975,GO:0005976,GO:0008150,GO:0008152,GO:0009056,GO:0009057,GO:0010393,GO:0016052,GO:0016829,GO:0016835,GO:0016837,GO:0043170,GO:0044238,GO:0045488,GO:0045490,GO:0046576,GO:0071704,GO:1901575	K18580		fuNOG[21]	03MMI@ascNOG,0IHX4@euNOG,0ME60@euroNOG,0MKE9@eurotNOG,0PHHF@fuNOG,10FN4@NOG,13MG8@opiNOG	NA|NA|NA	G	Pectinolytic enzymes consist of four classes of enzymes pectine lyase, polygalacturonase, pectin methylesterase and rhamnogalacturonase. Hydrolyzes alpha-D-galacturonopyranosyl- (1,2)-alpha-L-rhamnopyranosyl linkages in the backbone of the hairy regions of pectins
tF08286	148304.MAPG_06194T0	3.4e-188	663.3	FG08423.1		K09704		fuNOG[21]	03N41@ascNOG,0IEBK@euNOG,0PMP7@fuNOG,0U7RD@magNOG,13KPT@opiNOG,19P3W@sordNOG,COG3538@NOG	NA|NA|NA	S	DUF1237
tF08324	13684.SNOT_07691	3.9e-69	266.9	FG08636.1				fuNOG[21]	03S1A@ascNOG,0H739@dotNOG,0IJ6X@euNOG,0PJIK@fuNOG,11NGA@NOG,13P4G@opiNOG,157U1@pleNOG	NA|NA|NA
tF08340	29875.EHK22485	2.3e-149	534.6	FG02330.1				fuNOG[21]	03K69@ascNOG,0PIEE@fuNOG,0SG9H@hypNOG,13IKG@opiNOG,19N2M@sordNOG,COG2132@NOG,KOG1263@euNOG	NA|NA|NA	Q	to ascorbate oxidase
tF08359	861557.XP_003295889.1	1.2e-74	287	FG10237.1	GO:0000003,GO:0000282,GO:0000902,GO:0000910,GO:0003006,GO:0005575,GO:0005622,GO:0005623,GO:0005737,GO:0005856,GO:0005886,GO:0005887,GO:0005933,GO:0005935,GO:0005938,GO:0005940,GO:0007049,GO:0007105,GO:0007114,GO:0007120,GO:0007163,GO:0007275,GO:0008150,GO:0009653,GO:0009987,GO:0010564,GO:0010948,GO:0016020,GO:0016021,GO:0016043,GO:0019953,GO:0019954,GO:0022402,GO:0022414,GO:0022603,GO:0030010,GO:…	K18637		fuNOG[21]	03IK6@ascNOG,0H8AV@dotNOG,0IJ52@euNOG,0PFMN@fuNOG,11NXB@NOG,13M26@opiNOG,1580S@pleNOG	NA|NA|NA	S	CADG
tF08377	1047171.EFQ35324	2e-24	119					fuNOG[21]	03ZX0@ascNOG,0H88N@dotNOG,0IZ4T@euNOG,0PXJK@fuNOG,122XJ@NOG,146NK@opiNOG	NA|NA|NA	S	Cutinase
tF08391	36630.CADNFIAP00001491	2.4e-55	221.1	RNY1	GO:0000902,GO:0003674,GO:0003824,GO:0004518,GO:0004519,GO:0004521,GO:0004540,GO:0005575,GO:0005576,GO:0005622,GO:0005623,GO:0005737,GO:0005773,GO:0005775,GO:0005829,GO:0006139,GO:0006401,GO:0006725,GO:0006807,GO:0006915,GO:0008150,GO:0008152,GO:0008219,GO:0009056,GO:0009057,GO:0009653,GO:0009987,GO:0012501,GO:0016043,GO:0016070,GO:0016265,GO:0016787,GO:0016788,GO:0019439,GO:0031974,GO:0032502,GO:…	K01166		fuNOG[21]	03KWB@ascNOG,0MB7C@euroNOG,0MPV7@eurotNOG,0PHXQ@fuNOG,11M7G@NOG,12U1M@opiNOG,KOG1642@euNOG	NA|NA|NA	A	ribonuclease T2
tF08407	5022.CBX97244	1.8e-172	611.3	ECM14	GO:0000322,GO:0000323,GO:0000324,GO:0003674,GO:0003824,GO:0004175,GO:0004180,GO:0004181,GO:0004222,GO:0005575,GO:0005622,GO:0005623,GO:0005737,GO:0005773,GO:0005783,GO:0006508,GO:0008150,GO:0008152,GO:0008233,GO:0008235,GO:0008237,GO:0008238,GO:0009272,GO:0009987,GO:0016787,GO:0019538,GO:0042546,GO:0043170,GO:0043226,GO:0043227,GO:0043229,GO:0043231,GO:0044085,GO:0044238,GO:0044424,GO:0044444,GO:…	K08783		fuNOG[21]	03I8E@ascNOG,0H36W@dotNOG,0PF8X@fuNOG,12NHA@opiNOG,1593S@pleNOG,COG2866@NOG,KOG2650@euNOG	NA|NA|NA	E	Zn_pept
tF08447	426418.XP_001931569.1	3.5e-85	320.5	FG06770.1				fuNOG[21]	03S7T@ascNOG,0H7G5@dotNOG,0IV9Z@euNOG,0PQ28@fuNOG,11IKY@NOG,13RBW@opiNOG,15BTS@pleNOG	NA|NA|NA	U	Protein of unknown function (DUF1183)
tF08466	500485.XP_002568421.1	1.9e-132	477.6	MANA	GO:0000272,GO:0003674,GO:0003824,GO:0004553,GO:0004567,GO:0005575,GO:0005576,GO:0005975,GO:0005976,GO:0008150,GO:0008152,GO:0009056,GO:0009057,GO:0009987,GO:0010412,GO:0015923,GO:0016052,GO:0016787,GO:0016798,GO:0016985,GO:0016998,GO:0043170,GO:0044036,GO:0044237,GO:0044238,GO:0044247,GO:0044248,GO:0044260,GO:0044262,GO:0044264,GO:0044275,GO:0044699,GO:0044723,GO:0044724,GO:0044763,GO:0046355,GO:…	K19355		fuNOG[21]	03NDK@ascNOG,0IIG3@euNOG,0MA91@euroNOG,0MMXE@eurotNOG,0PKKN@fuNOG,12P7K@opiNOG,COG3934@NOG	NA|NA|NA	G	Endo-1,4-mannanase, a crucial enzyme for depolymerization of seed galactomannans and wood galactoglucomannans
tF08467	861557.XP_003306650.1	1.1e-72	278.9			K19356		fuNOG[21]	04002@ascNOG,0HBI6@dotNOG,0JE35@euNOG,0PXUN@fuNOG,118YW@NOG,146D5@opiNOG,15AAQ@pleNOG	NA|NA|NA	G	Glycosyl hydrolase family 61
tF08545	5061.CADANGAP00008726	6.5e-191	672.5					fuNOG[21]	03PI5@ascNOG,0MA5X@euroNOG,0MS22@eurotNOG,0PJ6X@fuNOG,12SF8@opiNOG,COG2303@NOG,KOG1238@euNOG	NA|NA|NA	E	GMC oxidoreductase
tF08548	5059.CADAFLAP00010267	5.6e-168	595.9	PLYC	GO:0005575,GO:0005576			euNOG[57]	0IJ4C@euNOG,0XQBW@NOG	NA|NA|NA	G	Pectinolytic enzyme consist of four classes of enzymes pectin lyase, polygalacturonase, pectin methylesterase and rhamnogalacturonase. Among pectinolytic enzymes, pectin lyase is the most important in depolymerization of pectin, since it cleaves internal glycosidic bonds of highly methylated pectins. Favors pectate, the anion, over pectin, the methyl ester (By similarity)
tF08590	148305.A4QUQ1	1.3e-264	917.1		GO:0003674,GO:0003824,GO:0004553,GO:0004557,GO:0005575,GO:0005576,GO:0005622,GO:0005623,GO:0005737,GO:0005783,GO:0005788,GO:0005975,GO:0005976,GO:0005984,GO:0005994,GO:0005995,GO:0008150,GO:0008152,GO:0009056,GO:0009311,GO:0009313,GO:0009987,GO:0015925,GO:0016052,GO:0016787,GO:0016798,GO:0031974,GO:0043170,GO:0043226,GO:0043227,GO:0043229,GO:0043231,GO:0043233,GO:0044237,GO:0044238,GO:0044260,GO:…	K07407		fuNOG[21]	03J6W@ascNOG,0PJ1J@fuNOG,0XPF1@NOG,138BF@opiNOG,KOG2366@euNOG	NA|NA|NA	G	Alpha-galactosidase
tF08607	426418.XP_001938821.1	3.4e-140	504.2	FG06549.1				fuNOG[21]	03M4T@ascNOG,0H679@dotNOG,0IVBH@euNOG,0PGMP@fuNOG,12RZ1@opiNOG,159ZD@pleNOG,COG0726@NOG	NA|NA|NA	G	Polysaccharide deacetylase
tF08617	578458.XP_003032839.1	6.5e-58	229.6	FG10959.1	GO:0005575,GO:0005576			fuNOG[21]	0IZUR@euNOG,0PQ6D@fuNOG,11WEA@NOG,13TEA@opiNOG	NA|NA|NA	S	Conserved hypothetical protein
tF08708	861557.XP_003300933.1	2.1e-189	668.3	FG06305.1	GO:0005575,GO:0005622,GO:0005623,GO:0005737,GO:0005783,GO:0006508,GO:0006511,GO:0008150,GO:0008152,GO:0009056,GO:0009057,GO:0009987,GO:0010498,GO:0019538,GO:0019941,GO:0030163,GO:0030433,GO:0043161,GO:0043170,GO:0043226,GO:0043227,GO:0043229,GO:0043231,GO:0043632,GO:0044237,GO:0044238,GO:0044248,GO:0044257,GO:0044260,GO:0044265,GO:0044267,GO:0044424,GO:0044444,GO:0044464,GO:0051603,GO:0071704,GO:…	K01230		fuNOG[21]	03MPN@ascNOG,0H4SF@dotNOG,0PKHB@fuNOG,0XP04@NOG,13NN0@opiNOG,157E2@pleNOG,KOG2431@euNOG	NA|NA|NA	G	Glycosyl hydrolase family 47
tF08727	578455.XP_003656706.1	1.8e-42	180.3					fuNOG[21]	04EA2@ascNOG,0QEGE@fuNOG,11FP9@NOG,13H32@opiNOG,KOG4157@euNOG	NA|NA|NA	G, O	Glyoxal oxidase N-terminus
tF08756	5022.CBY01819	1.6e-167	594.3	SCJ1	GO:0003674,GO:0005488,GO:0005515,GO:0005575,GO:0005622,GO:0005623,GO:0005634,GO:0005730,GO:0005737,GO:0005783,GO:0005788,GO:0006457,GO:0006508,GO:0006511,GO:0006950,GO:0006986,GO:0008150,GO:0008152,GO:0009056,GO:0009057,GO:0009987,GO:0010033,GO:0010498,GO:0019538,GO:0019941,GO:0030163,GO:0030433,GO:0030544,GO:0031072,GO:0031974,GO:0031981,GO:0033554,GO:0034620,GO:0034975,GO:0035966,GO:0035967,GO:…	K14002		fuNOG[21]	03K3R@ascNOG,0H69Q@dotNOG,0PH66@fuNOG,12RT4@opiNOG,159E2@pleNOG,COG0484@NOG,KOG0712@euNOG	NA|NA|NA	O	DnaJ central domain
tF08788	140110.NechaP100964	2.6e-14	84	FG02560.1				fuNOG[21]	040ZD@ascNOG,0JG8Z@euNOG,0PYJG@fuNOG,0SM1U@hypNOG,0X0ZT@necNOG,0YTQE@NOG,148MV@opiNOG,1A5E1@sordNOG	NA|NA|NA
tF08789	535722.XP_003171561.1	8.8e-87	326.2					fuNOG[21]	02Y53@arthNOG,03PAE@ascNOG,0M7SQ@euroNOG,0PMW2@fuNOG,0XT5U@NOG,12GZR@onyNOG,13Q3P@opiNOG,KOG2458@euNOG	NA|NA|NA	S	CAP10
tF08825	5059.CADAFLAP00001989	1.8e-151	541.2		GO:0000272,GO:0003674,GO:0003824,GO:0004553,GO:0004556,GO:0005575,GO:0005618,GO:0005622,GO:0005623,GO:0005737,GO:0005783,GO:0005886,GO:0005975,GO:0005976,GO:0008150,GO:0008152,GO:0008360,GO:0009056,GO:0009057,GO:0009272,GO:0009897,GO:0009986,GO:0009987,GO:0016020,GO:0016052,GO:0016160,GO:0016787,GO:0016798,GO:0022603,GO:0022604,GO:0030312,GO:0042546,GO:0043170,GO:0043226,GO:0043227,GO:0043229,GO:…	K01176		fuNOG[21]	03M0P@ascNOG,0PGMM@fuNOG,12QDU@opiNOG,COG0366@NOG,KOG0471@euNOG	NA|NA|NA	G	alpha-amylase
tF08830	861557.XP_003296590.1	1.4e-112	412.1	PGUG_02308	GO:0003674,GO:0003824,GO:0004497,GO:0005488,GO:0005506,GO:0008150,GO:0008152,GO:0016491,GO:0020037,GO:0043167,GO:0043169,GO:0044710,GO:0046872,GO:0046906,GO:0046914,GO:0055114,GO:0097159,GO:1901363	K00493		fuNOG[21]	03JBZ@ascNOG,0H5II@dotNOG,0PIJR@fuNOG,12NU8@opiNOG,157D8@pleNOG,COG2124@NOG,KOG0158@euNOG	NA|NA|NA	Q	Cytochrome P450
tF08837	441959.XP_002486145.1	2.2e-146	524.6					fuNOG[21]	03MHE@ascNOG,0IVCN@euNOG,0MA6Z@euroNOG,0MR45@eurotNOG,0PIJ1@fuNOG,127QA@NOG,13KBW@opiNOG	NA|NA|NA
tF08873	526221.XP_003000467.1	2.4e-34	150.6					fuNOG[21]	03TBG@ascNOG,0IZZG@euNOG,0PPSE@fuNOG,0XU5R@NOG,13SPQ@opiNOG	NA|NA|NA	S	Cupin_1
tF08886	5062.CADAORAP00000499	0	1171.4	MNDA	GO:0005575,GO:0005576	K01192		fuNOG[21]	03YI4@ascNOG,0PGS5@fuNOG,12NA1@opiNOG,COG3250@NOG,KOG2230@euNOG	NA|NA|NA	G	Exoglycosidase that cleaves the single beta-linked mannose residue from the non-reducing end of all N-linked glycoprotein oligosaccharides. Involved in the degradation of mannan and galactomannan (By similarity)
tF08892	162425.CADANIAP00004798	1.8e-119	435.3					fuNOG[21]	03P5F@ascNOG,0IHPE@euNOG,0M786@euroNOG,0MM21@eurotNOG,0PK2Z@fuNOG,0YNRS@NOG,13MCH@opiNOG	NA|NA|NA	S	Berberine and berberine like
tF08902	3694.POPTR_0009s10030.1	2.7e-09	69.7					virNOG[6]	0IEAP@euNOG,0Y914@NOG,1BCMJ@strNOG,1DQJ4@virNOG	NA|NA|NA	S	late embryogenesis
tF08914	5180.EDN96701	2.8e-90	337.8	FG05159.1	GO:0000041,GO:0003674,GO:0003824,GO:0004322,GO:0005575,GO:0005622,GO:0005623,GO:0005737,GO:0005783,GO:0005886,GO:0006810,GO:0006811,GO:0006812,GO:0006826,GO:0006873,GO:0006875,GO:0006879,GO:0008150,GO:0008152,GO:0009987,GO:0015684,GO:0016020,GO:0016491,GO:0016722,GO:0016724,GO:0019725,GO:0030001,GO:0030003,GO:0033212,GO:0033215,GO:0034220,GO:0034755,GO:0042592,GO:0043226,GO:0043227,GO:0043229,GO:…	K19791		fuNOG[21]	03KS3@ascNOG,0PHHS@fuNOG,12Q5N@opiNOG,COG2132@NOG,KOG1263@euNOG	NA|NA|NA	Q	Iron transport multicopper oxidase
tF09004	426418.XP_001936288.1	1e-208	731.9					fuNOG[21]	03J20@ascNOG,0H5VN@dotNOG,0IF4G@euNOG,0PG45@fuNOG,0YGH3@NOG,12Q84@opiNOG,15D3A@pleNOG	NA|NA|NA	G	Bacterial alpha-L-rhamnosidase
tF09052	5059.CADAFLAP00004515	1.5e-76	292		GO:0005575,GO:0005576			NOG[107]	COG2730@NOG	NA|NA|NA	G	Glycoside hydrolase Family 5
tF09054	140110.NechaP54454	5.7e-140	503.1	FG08115.1				fuNOG[21]	04B9P@ascNOG,0KNHH@euNOG,0Q9HC@fuNOG,0SIM3@hypNOG,0WXXJ@necNOG,10XFW@NOG,137XI@opiNOG,1A39U@sordNOG	NA|NA|NA	S	Protein of unknown function (DUF1593)
tF09066	5061.CADANGAP00000132	2.2e-145	521.2					fuNOG[21]	03MMQ@ascNOG,0IVRF@euNOG,0M7SE@euroNOG,0MIUB@eurotNOG,0PMMX@fuNOG,12T7V@opiNOG,COG0277@NOG	NA|NA|NA	C	FAD binding domain protein
tF09068	40559.EDN31423	6.7e-49	200.3					fuNOG[21]	03URP@ascNOG,0J4NQ@euNOG,0PT3X@fuNOG,0YQGW@NOG,13W5I@opiNOG	NA|NA|NA
tF09069	40559.EDN31422	4.4e-179	633.3		GO:0005575,GO:0005576			fuNOG[21]	03P85@ascNOG,0PJQJ@fuNOG,13J0C@opiNOG,COG2132@NOG,KOG1263@euNOG	NA|NA|NA	Q	Multicopper oxidase

## Sheet: S8
TableS8-annotation of the secreted proteins in P. citriasiana
pZ00430	162425.CADANIAP00005255	1.1e-09	69.3					fuNOG[21]	03RDR@ascNOG,0IWZJ@euNOG,0MDFU@euroNOG,0MJQK@eurotNOG,0PN68@fuNOG,11GUT@NOG,13QI5@opiNOG	NA|NA|NA	S	Fungal Zn(2)-Cys(6) binuclear cluster domain
pZ00456	13684.SNOT_08491	1.5e-29	133.7	CMC4	GO:0005575,GO:0005622,GO:0005623,GO:0005737,GO:0005739,GO:0005740,GO:0005758,GO:0031967,GO:0031970,GO:0031974,GO:0031975,GO:0043226,GO:0043227,GO:0043229,GO:0043231,GO:0044422,GO:0044424,GO:0044429,GO:0044444,GO:0044446,GO:0044464			fuNOG[21]	03V7G@ascNOG,0H8GW@dotNOG,0J3Q6@euNOG,0PSGY@fuNOG,123AV@NOG,13XWP@opiNOG,15C4U@pleNOG	NA|NA|NA	S	Domain of unknown function (DUF1903)
pZ00868	33178.CADATEAP00001915	2.5e-92	344	FG08922.1	GO:0003674,GO:0003824,GO:0005575,GO:0005622,GO:0005623,GO:0005634,GO:0005737,GO:0006793,GO:0006796,GO:0008150,GO:0008152,GO:0009058,GO:0009987,GO:0016311,GO:0016787,GO:0016788,GO:0016791,GO:0019637,GO:0019693,GO:0042578,GO:0043226,GO:0043227,GO:0043229,GO:0043231,GO:0044237,GO:0044424,GO:0044464,GO:0046390,GO:0050278,GO:0071704,GO:0090407,GO:1901135,GO:1901137,GO:1901576	K15634		fuNOG[21]	04E7M@ascNOG,0IUDB@euNOG,0MH0B@euroNOG,0QEDC@fuNOG,13GPI@opiNOG,COG0406@NOG	NA|NA|NA	G	phosphoglycerate mutase family protein
pZ01222	306901.XP_001226539.1	6.2e-12	75.5					fuNOG[21]	03W1V@ascNOG,0CXFB@chaNOG,0J6DP@euNOG,0PTJA@fuNOG,125WF@NOG,13YTN@opiNOG,19TFF@sordNOG,1AER3@sorNOG	NA|NA|NA
pZ01325	5022.CBX92782	6.6e-59	232.3	FG09731.1				fuNOG[21]	03SJQ@ascNOG,0H7U8@dotNOG,0IYG3@euNOG,0PPKT@fuNOG,11W4A@NOG,13SYV@opiNOG,15DIB@pleNOG	NA|NA|NA	S	Domain of unknown function (DUF202)
pZ01568	306901.XP_001221257.1	2.7e-11	74.7					fuNOG[21]	03RYE@ascNOG,0CVPR@chaNOG,0IXYV@euNOG,0PNYX@fuNOG,0YECV@NOG,13RN0@opiNOG,19RQM@sordNOG,1AECG@sorNOG	NA|NA|NA	O	Subtilase family
pZ01748	5022.CBX98936	4.8e-17	94					fuNOG[21]	03UVU@ascNOG,0J2MU@euNOG,0PS6F@fuNOG,0YX07@NOG,13XCU@opiNOG	NA|NA|NA	K	C6 transcription factor
pZ02285	771870.XP_003348194.1	3.1e-14	84.3					fuNOG[21]	03WMS@ascNOG,0PUHU@fuNOG,1419K@opiNOG,19WNI@sordNOG,1AARK@sorNOG,COG2124@NOG,KOG0157@euNOG	NA|NA|NA	Q	Cytochrome P450
pZ02577	40559.EDN32802	2.4e-10	71.6					fuNOG[21]	041AU@ascNOG,0JHGN@euNOG,0PZ1J@fuNOG,0Z287@NOG,14B7Q@opiNOG	NA|NA|NA
pZ02614	5022.CBX96675	5e-57	228	FG06109.1				fuNOG[21]	03TEA@ascNOG,0H8JB@dotNOG,0IZET@euNOG,0PQGD@fuNOG,121J3@NOG,13TB4@opiNOG,157YE@pleNOG	NA|NA|NA	S	COMPASS (Complex proteins associated with Set1p) component shg1
pZ02946	29850.GGTG_07437T0	2e-11	73.9					fuNOG[21]	047PY@ascNOG,0Q859@fuNOG,0UDTQ@magNOG,125SJ@NOG,134JZ@opiNOG,1A0GV@sordNOG,KOG3472@euNOG	NA|NA|NA	S	Protein of unknown function (DUF423)
pZ03101	33178.CADATEAP00000991	5.5e-25	118.6	VMA9	GO:0000032,GO:0000220,GO:0000322,GO:0000323,GO:0000324,GO:0000329,GO:0003674,GO:0003824,GO:0005215,GO:0005575,GO:0005622,GO:0005623,GO:0005737,GO:0005773,GO:0005774,GO:0006056,GO:0006057,GO:0006139,GO:0006152,GO:0006163,GO:0006195,GO:0006200,GO:0006461,GO:0006725,GO:0006753,GO:0006793,GO:0006796,GO:0006807,GO:0006810,GO:0006811,GO:0006873,GO:0006885,GO:0007035,GO:0008150,GO:0008152,GO:0009056,GO:…	K02153		fuNOG[21]	03UU2@ascNOG,0J3I8@euNOG,0PRUE@fuNOG,1259R@NOG,13X7S@opiNOG	NA|NA|NA	C	Vacuolar atp synthase subunit
pZ03102	5061.CADANGAP00001804	2.7e-59	234.6	ARV1	GO:0000139,GO:0005575,GO:0005622,GO:0005623,GO:0005737,GO:0005783,GO:0005789,GO:0005794,GO:0005938,GO:0006066,GO:0006464,GO:0006497,GO:0006505,GO:0006506,GO:0006629,GO:0006643,GO:0006644,GO:0006650,GO:0006661,GO:0006664,GO:0006665,GO:0006694,GO:0006696,GO:0006793,GO:0006796,GO:0006807,GO:0006810,GO:0006869,GO:0006897,GO:0007009,GO:0008150,GO:0008152,GO:0008202,GO:0008204,GO:0008610,GO:0008654,GO:…			fuNOG[21]	03Q25@ascNOG,0PM1R@fuNOG,13P95@opiNOG,COG5254@NOG,KOG3134@euNOG	NA|NA|NA	S	intracellular sterol transport
pZ03128	578455.XP_003649364.1	1.7e-17	94.4		GO:0001505,GO:0001654,GO:0001919,GO:0003008,GO:0003674,GO:0003824,GO:0003990,GO:0004091,GO:0004104,GO:0005575,GO:0005576,GO:0005578,GO:0005604,GO:0005605,GO:0005615,GO:0005622,GO:0005623,GO:0005737,GO:0005783,GO:0005788,GO:0005886,GO:0006066,GO:0006461,GO:0006576,GO:0006581,GO:0006807,GO:0006810,GO:0006897,GO:0006898,GO:0007154,GO:0007267,GO:0007268,GO:0007271,GO:0007275,GO:0007399,GO:0007416,GO:…			fuNOG[21]	03QDJ@ascNOG,0CSQS@chaNOG,0PHEY@fuNOG,13IB1@opiNOG,19QZT@sordNOG,1AA1M@sorNOG,COG2272@NOG,KOG4389@euNOG	NA|NA|NA	T	Carboxylesterase family
pZ03148	306901.XP_001224031.1	1.7e-08	63.5					fuNOG[21]	03W1B@ascNOG,0CVRI@chaNOG,0J63P@euNOG,0PTUP@fuNOG,0Y60N@NOG,13ZMZ@opiNOG,19TNK@sordNOG,1ACPU@sorNOG	NA|NA|NA
pZ03177	29875.EHK25847	7.4e-09	67					fuNOG[21]	041F9@ascNOG,0JJMI@euNOG,0PZ4K@fuNOG,0SKPR@hypNOG,1171A@NOG,14B0K@opiNOG,19TRK@sordNOG	NA|NA|NA
pZ03285	140110.NechaP86704	1.2e-29	135.6					fuNOG[21]	049VM@ascNOG,0KPJB@euNOG,0QAVG@fuNOG,0SJXU@hypNOG,10WFQ@NOG,136IX@opiNOG,1A65F@sordNOG	NA|NA|NA	S	Heterokaryon incompatibility protein (HET)
pZ03539	426418.XP_001936583.1	5.6e-65	252.7					fuNOG[21]	03T74@ascNOG,0H7UZ@dotNOG,0PQ5Q@fuNOG,11H59@NOG,13TNW@opiNOG,15BFU@pleNOG,KOG4697@euNOG	NA|NA|NA	U	Integral membrane protein S linking to the trans Golgi network
pZ03724	5059.CADAFLAP00003130	8.1e-14	82.4	FG00588.1				fuNOG[21]	03V51@ascNOG,0J2X4@euNOG,0M9DT@euroNOG,0MTEE@eurotNOG,0PT41@fuNOG,0Y776@NOG,13XG0@opiNOG	NA|NA|NA	S	CFEM domain
pZ03789	426418.XP_001930445.1	2e-67	260.4	FG10253.1				fuNOG[21]	03S5Q@ascNOG,0H7X4@dotNOG,0PPBU@fuNOG,11XD9@NOG,13UCE@opiNOG,15BRU@pleNOG,KOG4831@euNOG	NA|NA|NA	S	Uncharacterised protein family UPF0546
pZ03825	426418.XP_001934749.1	6.1e-09	67					fuNOG[21]	03VZT@ascNOG,0H92I@dotNOG,0J6C8@euNOG,0PTNE@fuNOG,0YP7N@NOG,13ZUS@opiNOG,15F52@pleNOG	NA|NA|NA
pZ03877	5507.FOXG_05449P0	1.3e-17	94.4	FG09972.1				fuNOG[21]	03UQ2@ascNOG,0J2V4@euNOG,0PRZV@fuNOG,0SKQJ@hypNOG,1257R@NOG,13WMA@opiNOG,19TGS@sordNOG	NA|NA|NA
pZ03966	578455.XP_003656183.1	1.9e-11	74.3					fuNOG[21]	03ZQZ@ascNOG,0CT3Y@chaNOG,0JCHH@euNOG,0PXD1@fuNOG,11CGV@NOG,145K6@opiNOG,19S7S@sordNOG,1ADZE@sorNOG	NA|NA|NA
pZ04008	36630.CADNFIAP00000190	1.4e-77	295	RIB7	GO:0000166,GO:0003674,GO:0003824,GO:0005488,GO:0005515,GO:0005575,GO:0005622,GO:0005623,GO:0005634,GO:0005737,GO:0005829,GO:0006766,GO:0006767,GO:0006771,GO:0006807,GO:0008150,GO:0008152,GO:0008703,GO:0009058,GO:0009110,GO:0009231,GO:0009987,GO:0016491,GO:0016614,GO:0016616,GO:0018130,GO:0034641,GO:0036094,GO:0042364,GO:0042726,GO:0042727,GO:0043226,GO:0043227,GO:0043229,GO:0043231,GO:0044237,GO:…	K14654	APRAUR,DHPPDA,DROPPRy	fuNOG[21]	03PUZ@ascNOG,0IJ0M@euNOG,0MD51@euroNOG,0MPT1@eurotNOG,0PMP3@fuNOG,13HF0@opiNOG,COG1985@NOG	NA|NA|NA	H	RibD C-terminal domain
pZ04116	6334.EFV56806	3.4e-29	134.4					fuNOG[21]	09VJI@biNOG,0V6IP@meNOG,0XCWA@nemNOG,0XQ50@NOG,12QC0@opiNOG,KOG0663@euNOG	NA|NA|NA	T	S_TKc
pZ04140	5141.EFNCRP00000005832	1.1e-40	172.2					fuNOG[21]	0JDJ0@euNOG,0PXMK@fuNOG,0YNK2@NOG,146E2@opiNOG	NA|NA|NA
pZ04471	4113.PGSC0003DMT400026515	1.2e-07	64.3					fuNOG[21]	COG4870@NOG,KOG1543@euNOG	NA|NA|NA	O	cathepsin
pZ04628	140110.NechaP99421	1.7e-16	92.4	FG06424.1				fuNOG[21]	042CP@ascNOG,0J0C1@euNOG,0Q0SF@fuNOG,0SIJZ@hypNOG,0WYM5@necNOG,11U5P@NOG,13VX9@opiNOG,19SJF@sordNOG	NA|NA|NA	S	SRP40, C-terminal domain
pZ04731	861557.XP_003295634.1	3.1e-11	74.3					fuNOG[21]	03WCA@ascNOG,0H901@dotNOG,0J5X8@euNOG,0PTFW@fuNOG,0ZP62@NOG,13YPW@opiNOG,15C6P@pleNOG	NA|NA|NA	S	HIT zinc finger
pZ04780	5180.EDO03391	2.3e-16	89.7					fuNOG[21]	03VQV@ascNOG,0J7TJ@euNOG,0PTA9@fuNOG,0Y6VY@NOG,13ZCH@opiNOG	NA|NA|NA
pZ04818	559298.XP_002620965.1	2.4e-32	145.2					fuNOG[21]	03WA2@ascNOG,0J758@euNOG,0M9UQ@euroNOG,0PTN1@fuNOG,0Z608@NOG,13ZHS@opiNOG	NA|NA|NA
pZ04819	336963.XP_002541257.1	1e-44	186					fuNOG[21]	03U8T@ascNOG,0J11E@euNOG,0M935@euroNOG,0PRMD@fuNOG,0YPCD@NOG,12H5D@onyNOG,13W4F@opiNOG	NA|NA|NA
pZ04837	5022.CBX92668	2.7e-26	124					fuNOG[21]	04EC5@ascNOG,0H95V@dotNOG,0IYCB@euNOG,0PP32@fuNOG,0ZK95@NOG,13S2X@opiNOG,15F1W@pleNOG	NA|NA|NA
pZ04838	29875.EHK18518	1.7e-27	129					fuNOG[21]	03XP6@ascNOG,0PKIB@fuNOG,12TNW@opiNOG,19IQM@sordNOG,COG0666@NOG,COG0775@NOG,KOG0504@euNOG,KOG4177@euNOG	NA|NA|NA	M	NACHT domain
pZ05034	861557.XP_003295828.1	3.5e-111	407.1		GO:0003674,GO:0003824,GO:0004620,GO:0005575,GO:0005622,GO:0005623,GO:0005737,GO:0005739,GO:0005740,GO:0005743,GO:0006066,GO:0006576,GO:0006629,GO:0006644,GO:0006650,GO:0006793,GO:0006796,GO:0006807,GO:0008081,GO:0008150,GO:0008152,GO:0009308,GO:0009987,GO:0016020,GO:0016021,GO:0016298,GO:0016787,GO:0016788,GO:0019637,GO:0019866,GO:0031090,GO:0031224,GO:0031300,GO:0031301,GO:0031304,GO:0031305,GO:…	K13985		fuNOG[21]	03JHY@ascNOG,0H9TF@dotNOG,0PICU@fuNOG,12U25@opiNOG,15D8H@pleNOG,COG2220@NOG,KOG3798@euNOG	NA|NA|NA	S	Inherit from ascNOG: Zn-dependent hydrolase oxidoreductase family protein
pZ05087	13684.SNOT_16473	9.5e-40	169.1	FG06244.1				fuNOG[21]	03SC7@ascNOG,0H8MA@dotNOG,0IXEB@euNOG,0PNWE@fuNOG,11XJK@NOG,13RDC@opiNOG,15BGD@pleNOG	NA|NA|NA	S	Inherit from ascNOG: Conserved hypothetical protein
pZ05174	5062.CADAORAP00008035	5.5e-30	136	FG09159.1	GO:0000272,GO:0003674,GO:0003824,GO:0004553,GO:0005575,GO:0005576,GO:0005975,GO:0005976,GO:0008150,GO:0008152,GO:0008422,GO:0009056,GO:0009057,GO:0009251,GO:0015926,GO:0016052,GO:0016787,GO:0016798,GO:0043170,GO:0044042,GO:0044238,GO:0071704,GO:1901575			fuNOG[21]	03JQ1@ascNOG,0IEJZ@euNOG,0PGSD@fuNOG,12PBD@opiNOG,COG1472@NOG	NA|NA|NA	G	Beta-glucosidases are one of a number of cellulolytic enzymes involved in the degradation of cellulosic biomass. Catalyzes the last step releasing glucose from the inhibitory cellobiose
pZ05921	441960.XP_002151832.1	2.2e-22	109.8	PGUG_05228	GO:0005575,GO:0005622,GO:0005623,GO:0005737,GO:0005739,GO:0005759,GO:0006461,GO:0006996,GO:0007005,GO:0008150,GO:0008152,GO:0009058,GO:0009987,GO:0016043,GO:0016226,GO:0022607,GO:0031163,GO:0031974,GO:0033108,GO:0034552,GO:0034553,GO:0034622,GO:0043226,GO:0043227,GO:0043229,GO:0043231,GO:0043233,GO:0043623,GO:0043933,GO:0044085,GO:0044422,GO:0044424,GO:0044429,GO:0044444,GO:0044446,GO:0044464,GO:…	K18167		fuNOG[21]	03UKE@ascNOG,0MDAK@euroNOG,0MSBB@eurotNOG,0PRUS@fuNOG,122JQ@NOG,13W9I@opiNOG,KOG4620@euNOG	NA|NA|NA	O	Hsp20/alpha crystallin family
pZ05956	500485.XP_002560125.1	7.2e-31	139.4			K17888		fuNOG[21]	03U4R@ascNOG,0J12W@euNOG,0M95D@euroNOG,0MSWG@eurotNOG,0PRC9@fuNOG,126SM@NOG,13VIE@opiNOG	NA|NA|NA
pZ05971	306901.XP_001219534.1	1.7e-12	77.8					fuNOG[21]	03RW7@ascNOG,0CUPS@chaNOG,0IXZ9@euNOG,0PNVZ@fuNOG,0XZJI@NOG,13RHH@opiNOG,19MC0@sordNOG,1AD1A@sorNOG	NA|NA|NA	S	Inherit from sordNOG: conserved hypothetical protein
pZ05973	5507.FOXG_07003P0	8.6e-10	69.7					fuNOG[21]	03RW7@ascNOG,0IXZ9@euNOG,0PNVZ@fuNOG,0XZJI@NOG,13RHH@opiNOG,19MC0@sordNOG	NA|NA|NA	S	conserved hypothetical protein
pZ06195	9031.ENSGALP00000013206	1.1e-12	79.7					fuNOG[21]	09U8F@biNOG,0DFDX@chorNOG,0V57J@meNOG,0XNMM@NOG,12N1R@opiNOG,1CQ81@veNOG,KOG3544@euNOG	NA|NA|NA	W	collagen, type IV, alpha
pZ06324	5022.CBX97711	7.2e-10	70.1					fuNOG[21]	03VMN@ascNOG,0H903@dotNOG,0J7B8@euNOG,0PTR1@fuNOG,0Y6G1@NOG,13Z8A@opiNOG,15EAZ@pleNOG	NA|NA|NA	S	Inherit from ascNOG: hemagglutinin protein
pZ06384	500485.XP_002564216.1	2.1e-64	251.1					fuNOG[21]	03NGP@ascNOG,0IJJT@euNOG,0M9XG@euroNOG,0MQCN@eurotNOG,0PJHC@fuNOG,11HRQ@NOG,13K22@opiNOG	NA|NA|NA	S	Phosphotransferase enzyme family
pZ06448	13684.SNOT_09545	1.2e-59	235.3	FG09187.1				fuNOG[21]	03RW3@ascNOG,0H7DZ@dotNOG,0PNWA@fuNOG,13RMF@opiNOG,15AD1@pleNOG,COG1028@NOG,KOG0725@euNOG	NA|NA|NA	Q	short chain dehydrogenase
pZ06687	5061.CADANGAP00006996	9.7e-18	95.1					fuNOG[21]	03S29@ascNOG,0PP2D@fuNOG,1318D@opiNOG,COG2272@NOG,KOG1516@euNOG	NA|NA|NA	I	Carboxylesterase family
pZ06709	500485.XP_002557794.1	4.1e-65	254.2					fuNOG[21]	03UFV@ascNOG,0M2UG@euroNOG,0MNKN@eurotNOG,0PRPN@fuNOG,0XRBH@NOG,13VH0@opiNOG,KOG1290@euNOG	NA|NA|NA	T	STYKc
pZ06745	5180.EDO02977	3.4e-27	128.3			K01183		fuNOG[21]	03P03@ascNOG,0PJY5@fuNOG,12QHY@opiNOG,COG3325@NOG,KOG2806@euNOG	NA|NA|NA	G	chitinase
pZ06748	5180.EDO02977	4.9e-31	141			K01183		fuNOG[21]	03P03@ascNOG,0PJY5@fuNOG,12QHY@opiNOG,COG3325@NOG,KOG2806@euNOG	NA|NA|NA	G	chitinase
pZ06932	861557.XP_003302416.1	1.4e-25	120.6	FG09741.1				fuNOG[21]	03VJY@ascNOG,0H910@dotNOG,0J4GZ@euNOG,0PSVV@fuNOG,125ZY@NOG,13XDW@opiNOG,15C87@pleNOG	NA|NA|NA
pZ07002	500485.XP_002566133.1	2.7e-11	74.3	FG00704.1				fuNOG[21]	03QCV@ascNOG,0M38V@euroNOG,0MK22@eurotNOG,0PK7T@fuNOG,13NKY@opiNOG,COG1024@NOG,KOG1680@euNOG	NA|NA|NA	I	enoyl-CoA hydratase isomerase family protein
pZ07198	5061.CADANGAP00006289	3.5e-21	107.5	FG10073.1				fuNOG[21]	03VEW@ascNOG,0J3AH@euNOG,0M91Q@euroNOG,0PSX1@fuNOG,124EH@NOG,13WWT@opiNOG	NA|NA|NA
pZ07237	13684.SNOT_02440	7.6e-16	90.1					fuNOG[21]	03S59@ascNOG,0H7X6@dotNOG,0IXUE@euNOG,0PP45@fuNOG,0YM10@NOG,13S80@opiNOG,15CUF@pleNOG	NA|NA|NA	S	Phosphotransferase enzyme family
pZ07250	578458.XP_003029224.1	1.3e-115	421.4	FG04555.1	GO:0000003,GO:0007049,GO:0007059,GO:0007126,GO:0008150,GO:0009987,GO:0022402,GO:0044699,GO:0044763,GO:0045132,GO:0048610,GO:0051321			fuNOG[21]	094YK@basNOG,0IE14@euNOG,0PFJJ@fuNOG,13JSM@opiNOG,COG3665@NOG	NA|NA|NA	S	Domain of unknown function (DUF1989)
pZ07271	162425.CADANIAP00002738	8.3e-50	201.8	FG03334.1				fuNOG[21]	03S25@ascNOG,0IXCM@euNOG,0PP28@fuNOG,11MGS@NOG,13R75@opiNOG	NA|NA|NA
pZ07294	5022.CBY00329	3.1e-12	77.4					fuNOG[21]	03W3V@ascNOG,0HAJ7@dotNOG,0J7IS@euNOG,0PTTS@fuNOG,0Y4BC@NOG,13YZN@opiNOG,15BP1@pleNOG	NA|NA|NA
pZ07392	140110.NechaP4538	6.2e-20	104					fuNOG[21]	03ZW4@ascNOG,0JD36@euNOG,0PXIB@fuNOG,0SM52@hypNOG,0ZPIW@NOG,145WT@opiNOG,19RWD@sordNOG	NA|NA|NA
pZ07512	13684.SNOT_03439	1.2e-16	92.8	FG07430.1				fuNOG[21]	03TAK@ascNOG,0H7WT@dotNOG,0IZKV@euNOG,0PQ4V@fuNOG,11QTG@NOG,13T89@opiNOG,157ZB@pleNOG	NA|NA|NA
pZ07513	5022.CBY01168	9.5e-14	81.3					fuNOG[21]	03SEH@ascNOG,0HBAI@dotNOG,0IZ5R@euNOG,0PPER@fuNOG,13SFD@opiNOG,158T6@pleNOG,COG2110@NOG,KOG2633@euNOG	NA|NA|NA	B, K	A1pp
pZ07632	148305.A4QZA4	4e-14	83.6					fuNOG[21]	03YYG@ascNOG,0J7GV@euNOG,0PTTG@fuNOG,117YQ@NOG,14018@opiNOG,19M4Y@sordNOG	NA|NA|NA
pZ07633	318829.MGG_16961T0	1.1e-58	233.4					fuNOG[21]	03YYG@ascNOG,0J7GV@euNOG,0PTTG@fuNOG,117YQ@NOG,14018@opiNOG,19M4Y@sordNOG	NA|NA|NA
pZ07649	148304.MAPG_05754T0	1.3e-07	63.2					fuNOG[21]	042F5@ascNOG,0JNZD@euNOG,0Q0FR@fuNOG,0U9B5@magNOG,11BMM@NOG,14DDI@opiNOG,19YH7@sordNOG	NA|NA|NA	S	ZnF_C2H2
pZ07720	663331.XP_003012283.1	1.2e-98	366.3	AIM9	GO:0005575,GO:0005622,GO:0005623,GO:0005737,GO:0005739,GO:0043226,GO:0043227,GO:0043229,GO:0043231,GO:0044424,GO:0044444,GO:0044464	K01883		fuNOG[21]	02X1Z@arthNOG,03NFC@ascNOG,0IGT7@euNOG,0M71H@euroNOG,0PIY2@fuNOG,0XR8W@NOG,12JKG@onyNOG,12SVW@opiNOG	NA|NA|NA	S	Phosphotransferase enzyme family
pZ07739	36630.CADNFIAP00007727	3.4e-07	60.5					fuNOG[21]	03PB6@ascNOG,0IJ5R@euNOG,0MDIA@euroNOG,0MT3W@eurotNOG,0PKZZ@fuNOG,0Y7GR@NOG,13NDX@opiNOG	NA|NA|NA
pZ07858	36630.CADNFIAP00004679	6.2e-45	186					fuNOG[21]	03ZNX@ascNOG,0JD7D@euNOG,0MDX6@euroNOG,0MN5X@eurotNOG,0PX61@fuNOG,0YK0X@NOG,145ZD@opiNOG	NA|NA|NA	S	4-carboxymuconolactone decarboxylase family protein
pZ07880	33178.CADATEAP00003174	2.7e-07	61.6					fuNOG[21]	0407C@ascNOG,0JE57@euNOG,0MAUM@euroNOG,0MTAQ@eurotNOG,0PXWB@fuNOG,0YP8G@NOG,146TS@opiNOG	NA|NA|NA
pZ07932	554155.XP_002844164.1	4.4e-09	68.2					fuNOG[21]	03WFR@ascNOG,0JBB4@euNOG,0M6AY@euroNOG,0PUNJ@fuNOG,11MV6@NOG,12GUE@onyNOG,14401@opiNOG	NA|NA|NA	S	Protein of unknown function (DUF3433)
pZ07960	13684.SNOT_05847	7e-10	70.5					fuNOG[21]	04C5S@ascNOG,0HBG5@dotNOG,0IMC2@euNOG,0QD5S@fuNOG,111VC@NOG,139NK@opiNOG,15E1R@pleNOG	NA|NA|NA
pZ08109	13684.SNOT_04980	4.7e-08	63.9	FG04362.1	GO:0007275,GO:0008150,GO:0032501,GO:0032502,GO:0043581,GO:0044699,GO:0044707,GO:0044767,GO:0048856			fuNOG[21]	03QM6@ascNOG,0H8KG@dotNOG,0IE1P@euNOG,0PI63@fuNOG,0Y37E@NOG,13KJZ@opiNOG,159GT@pleNOG	NA|NA|NA	S	Inherit from ascNOG: Conserved hypothetical protein
pZ08182	426418.XP_001932885.1	2.9e-27	125.9					fuNOG[21]	041G8@ascNOG,0JPB4@euNOG,0PZ5B@fuNOG,0Y4M9@NOG,149I3@opiNOG	NA|NA|NA
pZ08687	5057.CADACLAP00007281	2.2e-15	88.2					fuNOG[21]	03ZPC@ascNOG,0JREN@euNOG,0M8NU@euroNOG,0MTFK@eurotNOG,0PXBG@fuNOG,0ZMHH@NOG,14FUJ@opiNOG	NA|NA|NA	S	Inherit from euroNOG: BTB/POZ domain
pZ08705	5057.CADACLAP00007281	3.7e-16	90.9					fuNOG[21]	03ZPC@ascNOG,0JREN@euNOG,0M8NU@euroNOG,0MTFK@eurotNOG,0PXBG@fuNOG,0ZMHH@NOG,14FUJ@opiNOG	NA|NA|NA	S	Inherit from euroNOG: BTB/POZ domain
pZ08706	1047171.EFQ32268	3.7e-37	160.2					fuNOG[21]	03VSP@ascNOG,0H907@dotNOG,0J6NQ@euNOG,0PU37@fuNOG,0YTWE@NOG,13ZXS@opiNOG	NA|NA|NA
pZ08783	117187.FVEG_02740T0	3.2e-08	63.2					fuNOG[21]	03VXI@ascNOG,0J7CJ@euNOG,0PTDT@fuNOG,0SC2Q@hypNOG,0ZCSX@NOG,13ZTS@opiNOG,19TF8@sordNOG	NA|NA|NA
pZ08872	240176.XP_001835661.1	3e-44	184.9	FG11315.1				fuNOG[21]	01874@agaNOG,01HEV@agarNOG,095CY@basNOG,0IWUK@euNOG,0PMWT@fuNOG,11FPP@NOG,13QJG@opiNOG	NA|NA|NA
pZ08947	861557.XP_003300636.1	3e-18	99					fuNOG[21]	04C5S@ascNOG,0HBG5@dotNOG,0IMC2@euNOG,0QD5S@fuNOG,111VC@NOG,139NK@opiNOG,15E1R@pleNOG	NA|NA|NA
pZ09193	5180.EDO01637	1.5e-09	69.7					fuNOG[21]	03VRS@ascNOG,0J5G0@euNOG,0PTBD@fuNOG,11CMA@NOG,13ZRP@opiNOG	NA|NA|NA
pZ08851	5061.CADANGAP00004955	5.2e-09	67.4					fuNOG[21]	043UG@ascNOG,0K0EP@euNOG,0MCW5@euroNOG,0MQDP@eurotNOG,0Q2AW@fuNOG,10AZB@NOG,14H1R@opiNOG	NA|NA|NA
pZ09185	5085.CADAFUBP00009483	4.8e-07	61.6					fuNOG[21]	043UG@ascNOG,0K0EP@euNOG,0MCW5@euroNOG,0MQDP@eurotNOG,0Q2AW@fuNOG,10AZB@NOG,14H1R@opiNOG	NA|NA|NA

## Sheet: S9
TableS9-List of the orphan gene ids in three Phyllosticta species.
P. capitalensis	P. citriasiana	P. citricarpa
cF00004	pZ00020	tF00013
cF00006	pZ00042	tF00052
cF00007	pZ00057	tF00063
cF00012	pZ00063	tF00262
cF00014	pZ00064	tF00264
cF00015	pZ00066	tF00286
cF00017	pZ00151	tF00304
cF00020	pZ00152	tF00306
cF00022	pZ00232	tF00330
cF00053	pZ00241	tF00379
cF00061	pZ00242	tF00444
cF00065	pZ00258	tF00505
cF00068	pZ00259	tF00554
cF00071	pZ00260	tF00566
cF00080	pZ00279	tF00587
cF00081	pZ00312	tF00656
cF00082	pZ00364	tF00684
cF00086	pZ00391	tF00685
cF00087	pZ00410	tF00775
cF00088	pZ00430	tF00900
cF00089	pZ00456	tF00903
cF00092	pZ00621	tF00908
cF00112	pZ00623	tF00912
cF00113	pZ00626	tF00928
cF00114	pZ00627	tF00976
cF00121	pZ00629	tF01003
cF00132	pZ00682	tF01030
cF00141	pZ00688	tF01031
cF00146	pZ00730	tF01154
cF00150	pZ00737	tF01163
cF00161	pZ00782	tF01190
cF00179	pZ00808	tF01267
cF00180	pZ00820	tF01270
cF00181	pZ00822	tF01306
cF00183	pZ00849	tF01326
cF00199	pZ00868	tF01386
cF00200	pZ00911	tF01398
cF00215	pZ00946	tF01409
cF00221	pZ00988	tF01472
cF00225	pZ01067	tF01473
cF00226	pZ01095	tF01533
cF00243	pZ01110	tF01641
cF00246	pZ01168	tF01669
cF00260	pZ01222	tF01696
cF00261	pZ01225	tF01743
cF00265	pZ01274	tF01869
cF00267	pZ01325	tF01883
cF00280	pZ01367	tF01897
cF00281	pZ01409	tF01977
cF00282	pZ01549	tF02051
cF00283	pZ01568	tF02054
cF00285	pZ01700	tF02134
cF00286	pZ01706	tF02137
cF00305	pZ01748	tF02202
cF00316	pZ01797	tF02234
cF00320	pZ01848	tF02244
cF00329	pZ01867	tF02277
cF00332	pZ01984	tF02325
cF00344	pZ02011	tF02326
cF00349	pZ02020	tF02342
cF00357	pZ02070	tF02356
cF00363	pZ02154	tF02360
cF00374	pZ02203	tF02431
cF00383	pZ02216	tF02480
cF00397	pZ02262	tF02489
cF00399	pZ02285	tF02497
cF00405	pZ02402	tF02557
cF00409	pZ02498	tF02598
cF00439	pZ02502	tF02725
cF00440	pZ02503	tF02726
cF00445	pZ02506	tF02804
cF00446	pZ02563	tF02848
cF00454	pZ02577	tF02889
cF00455	pZ02585	tF02986
cF00460	pZ02598	tF02988
cF00463	pZ02600	tF03084
cF00475	pZ02614	tF03156
cF00480	pZ02652	tF03167
cF00482	pZ02654	tF03211
cF00483	pZ02664	tF03213
cF00490	pZ02767	tF03231
cF00491	pZ02794	tF03266
cF00493	pZ02805	tF03307
cF00499	pZ02835	tF03341
cF00501	pZ02860	tF03346
cF00502	pZ02906	tF03378
cF00526	pZ02946	tF03379
cF00545	pZ02970	tF03420
cF00553	pZ02984	tF03523
cF00564	pZ03010	tF03590
cF00581	pZ03018	tF03614
cF00589	pZ03019	tF03667
cF00590	pZ03034	tF03726
cF00591	pZ03053	tF03727
cF00594	pZ03063	tF03730
cF00621	pZ03085	tF03755
cF00629	pZ03101	tF03772
cF00631	pZ03102	tF03817
cF00640	pZ03128	tF03874
cF00656	pZ03148	tF03899
cF00657	pZ03177	tF03911
cF00658	pZ03209	tF03912
cF00659	pZ03214	tF03913
cF00660	pZ03229	tF03914
cF00661	pZ03285	tF03929
cF00662	pZ03335	tF03954
cF00663	pZ03338	tF03968
cF00666	pZ03480	tF03992
cF00674	pZ03539	tF03998
cF00680	pZ03635	tF04043
cF00682	pZ03678	tF04157
cF00687	pZ03712	tF04160
cF00688	pZ03724	tF04168
cF00689	pZ03789	tF04264
cF00690	pZ03825	tF04304
cF00692	pZ03829	tF04336
cF00706	pZ03877	tF04338
cF00712	pZ03912	tF04547
cF00715	pZ03949	tF04649
cF00717	pZ03964	tF04699
cF00729	pZ03966	tF04700
cF00734	pZ03988	tF04701
cF00735	pZ04008	tF04702
cF00736	pZ04066	tF04708
cF00737	pZ04068	tF04709
cF00738	pZ04116	tF04710
cF00739	pZ04121	tF04713
cF00740	pZ04138	tF04715
cF00741	pZ04140	tF04718
cF00745	pZ04178	tF04720
cF00751	pZ04200	tF04736
cF00798	pZ04317	tF04759
cF00799	pZ04328	tF04786
cF00800	pZ04339	tF04861
cF00801	pZ04379	tF04870
cF00802	pZ04408	tF04873
cF00803	pZ04427	tF04917
cF00804	pZ04446	tF04931
cF00821	pZ04447	tF05121
cF00838	pZ04471	tF05140
cF00839	pZ04556	tF05161
cF00857	pZ04628	tF05167
cF00875	pZ04653	tF05189
cF00900	pZ04654	tF05214
cF00906	pZ04669	tF05215
cF00907	pZ04729	tF05244
cF00908	pZ04731	tF05303
cF00909	pZ04751	tF05311
cF00910	pZ04780	tF05335
cF00911	pZ04818	tF05357
cF00914	pZ04819	tF05358
cF00927	pZ04827	tF05365
cF00931	pZ04837	tF05375
cF00932	pZ04838	tF05496
cF00941	pZ04855	tF05529
cF00942	pZ04856	tF05536
cF00944	pZ05001	tF05554
cF00945	pZ05012	tF05555
cF00946	pZ05034	tF05566
cF00954	pZ05043	tF05653
cF00957	pZ05045	tF05657
cF00967	pZ05046	tF05685
cF00973	pZ05087	tF05688
cF00974	pZ05174	tF05689
cF00976	pZ05193	tF05715
cF00977	pZ05288	tF05716
cF00979	pZ05303	tF05717
cF00980	pZ05340	tF05720
cF00981	pZ05417	tF05721
cF00982	pZ05431	tF05722
cF00983	pZ05479	tF05723
cF00984	pZ05506	tF05724
cF00989	pZ05563	tF05725
cF00995	pZ05574	tF05853
cF01015	pZ05589	tF05862
cF01030	pZ05597	tF05887
cF01032	pZ05636	tF05896
cF01037	pZ05691	tF05897
cF01040	pZ05822	tF05923
cF01064	pZ05824	tF05924
cF01065	pZ05907	tF05931
cF01066	pZ05911	tF05940
cF01067	pZ05920	tF06033
cF01075	pZ05921	tF06151
cF01076	pZ05929	tF06156
cF01088	pZ05951	tF06158
cF01095	pZ05956	tF06215
cF01104	pZ05971	tF06274
cF01105	pZ05973	tF06287
cF01159	pZ06098	tF06291
cF01186	pZ06195	tF06296
cF01188	pZ06196	tF06297
cF01203	pZ06240	tF06299
cF01216	pZ06324	tF06320
cF01217	pZ06325	tF06324
cF01225	pZ06327	tF06330
cF01230	pZ06328	tF06335
cF01242	pZ06329	tF06441
cF01243	pZ06330	tF06470
cF01251	pZ06331	tF06489
cF01255	pZ06335	tF06526
cF01263	pZ06340	tF06553
cF01264	pZ06342	tF06622
cF01266	pZ06345	tF06644
cF01282	pZ06346	tF06697
cF01285	pZ06348	tF06754
cF01289	pZ06350	tF06757
cF01295	pZ06351	tF06871
cF01313	pZ06358	tF06901
cF01318	pZ06384	tF06928
cF01329	pZ06398	tF06929
cF01336	pZ06431	tF06934
cF01341	pZ06448	tF06941
cF01349	pZ06453	tF06942
cF01361	pZ06477	tF06943
cF01367	pZ06494	tF07127
cF01368	pZ06547	tF07167
cF01369	pZ06565	tF07186
cF01375	pZ06573	tF07223
cF01376	pZ06615	tF07231
cF01378	pZ06618	tF07279
cF01379	pZ06640	tF07290
cF01386	pZ06682	tF07297
cF01388	pZ06685	tF07366
cF01392	pZ06687	tF07368
cF01405	pZ06709	tF07369
cF01419	pZ06720	tF07394
cF01421	pZ06745	tF07395
cF01423	pZ06748	tF07467
cF01424	pZ06777	tF07502
cF01455	pZ06778	tF07577
cF01459	pZ06897	tF07616
cF01460	pZ06903	tF07665
cF01467	pZ06932	tF07708
cF01471	pZ07002	tF07793
cF01472	pZ07094	tF07808
cF01474	pZ07116	tF07869
cF01489	pZ07127	tF07915
cF01502	pZ07156	tF07964
cF01507	pZ07198	tF07986
cF01508	pZ07237	tF07988
cF01509	pZ07250	tF07989
cF01510	pZ07271	tF08075
cF01511	pZ07294	tF08082
cF01515	pZ07297	tF08142
cF01520	pZ07382	tF08187
cF01521	pZ07383	tF08283
cF01524	pZ07389	tF08311
cF01525	pZ07391	tF08369
cF01542	pZ07392	tF08567
cF01550	pZ07393	tF08579
cF01553	pZ07394	tF08677
cF01558	pZ07395	tF08709
cF01559	pZ07396	tF08710
cF01560	pZ07397	tF08730
cF01561	pZ07398	tF08731
cF01562	pZ07399	tF08750
cF01563	pZ07400	tF08808
cF01564	pZ07401	tF08938
cF01565	pZ07402	tF08951
cF01566	pZ07403	tF09018
cF01570	pZ07404	tF09076
cF01576	pZ07405
cF01577	pZ07483
cF01578	pZ07512
cF01583	pZ07513
cF01603	pZ07565
cF01607	pZ07575
cF01611	pZ07603
cF01615	pZ07610
cF01616	pZ07618
cF01644	pZ07631
cF01645	pZ07632
cF01646	pZ07633
cF01647	pZ07649
cF01648	pZ07681
cF01654	pZ07691
cF01655	pZ07720
cF01664	pZ07739
cF01669	pZ07740
cF01670	pZ07858
cF01671	pZ07877
cF01672	pZ07880
cF01683	pZ07932
cF01693	pZ07949
cF01699	pZ07953
cF01700	pZ07954
cF01701	pZ07960
cF01703	pZ07961
cF01705	pZ07965
cF01706	pZ08060
cF01707	pZ08089
cF01708	pZ08104
cF01709	pZ08107
cF01710	pZ08109
cF01711	pZ08122
cF01712	pZ08123
cF01713	pZ08125
cF01714	pZ08181
cF01715	pZ08182
cF01716	pZ08190
cF01717	pZ08341
cF01732	pZ08344
cF01735	pZ08359
cF01748	pZ08376
cF01751	pZ08399
cF01752	pZ08452
cF01753	pZ08519
cF01761	pZ08528
cF01762	pZ08543
cF01768	pZ08627
cF01781	pZ08684
cF01787	pZ08687
cF01799	pZ08702
cF01804	pZ08705
cF01805	pZ08706
cF01806	pZ08741
cF01837	pZ08783
cF01842	pZ08792
cF01846	pZ08816
cF01848	pZ08826
cF01849	pZ08852
cF01850	pZ08853
cF01851	pZ08855
cF01861	pZ08872
cF01869	pZ08876
cF01874	pZ08892
cF01877	pZ08924
cF01903	pZ08946
cF01911	pZ08947
cF01912	pZ08948
cF01913	pZ08949
cF01914	pZ08960
cF01925	pZ08966
cF01932	pZ09004
cF01933	pZ09018
cF01934	pZ09019
cF01935	pZ09030
cF01936	pZ09106
cF01937	pZ09129
cF01938	pZ09130
cF01940	pZ09131
cF01944	pZ09132
cF01960	pZ09133
cF01963	pZ09134
cF01964	pZ09165
cF01965	pZ09181
cF01966	pZ09182
cF01967	pZ09183
cF01968	pZ09184
cF01970	pZ09194
cF01978	pZ09195
cF01981	pZ09197
cF01990	pZ09198
cF01991	pZ09199
cF01992	pZ09200
cF01993	pZ09201
cF01994	pZ09208
cF01995	pZ09209
cF01996	pZ07406
cF01997	pZ09191
cF02011	pZ09190
cF02019	pZ07407
cF02020	pZ07408
cF02032	pZ09192
cF02033	pZ07409
cF02040	pZ09193
cF02053	pZ08106
cF02071	pZ09196
cF02073	pZ08851
cF02080	pZ09185
cF02081
cF02087
cF02088
cF02089
cF02090
cF02092
cF02093
cF02094
cF02095
cF02097
cF02098
cF02099
cF02100
cF02101
cF02114
cF02142
cF02143
cF02144
cF02145
cF02146
cF02147
cF02152
cF02166
cF02171
cF02172
cF02173
cF02174
cF02180
cF02181
cF02221
cF02222
cF02225
cF02226
cF02227
cF02241
cF02242
cF02243
cF02244
cF02245
cF02248
cF02249
cF02250
cF02266
cF02274
cF02282
cF02283
cF02285
cF02291
cF02311
cF02317
cF02322
cF02324
cF02325
cF02344
cF02352
cF02354
cF02363
cF02381
cF02382
cF02383
cF02384
cF02388
cF02389
cF02390
cF02393
cF02404
cF02406
cF02414
cF02417
cF02419
cF02425
cF02426
cF02428
cF02429
cF02430
cF02431
cF02437
cF02438
cF02439
cF02440
cF02441
cF02444
cF02449
cF02450
cF02453
cF02454
cF02455
cF02457
cF02458
cF02459
cF02460
cF02462
cF02484
cF02492
cF02501
cF02502
cF02516
cF02520
cF02529
cF02530
cF02536
cF02552
cF02553
cF02554
cF02555
cF02556
cF02557
cF02558
cF02559
cF02573
cF02574
cF02586
cF02587
cF02608
cF02609
cF02610
cF02619
cF02627
cF02628
cF02637
cF02642
cF02644
cF02645
cF02646
cF02647
cF02648
cF02650
cF02651
cF02653
cF02654
cF02655
cF02657
cF02658
cF02662
cF02665
cF02666
cF02667
cF02679
cF02685
cF02686
cF02687
cF02688
cF02689
cF02690
cF02691
cF02692
cF02693
cF02694
cF02695
cF02711
cF02712
cF02717
cF02718
cF02724
cF02725
cF02726
cF02727
cF02728
cF02734
cF02735
cF02736
cF02737
cF02738
cF02744
cF02745
cF02746
cF02747
cF02748
cF02760
cF02763
cF02765
cF02766
cF02803
cF02808
cF02816
cF02846
cF02853
cF02854
cF02862
cF02875
cF02887
cF02892
cF02898
cF02899
cF02902
cF02910
cF02922
cF02923
cF02927
cF02929
cF02954
cF02965
cF02989
cF02990
cF02991
cF02992
cF02993
cF02994
cF02995
cF02996
cF02997
cF02998
cF02999
cF03000
cF03001
cF03002
cF03009
cF03011
cF03012
cF03019
cF03020
cF03021
cF03022
cF03023
cF03024
cF03025
cF03030
cF03031
cF03040
cF03053
cF03056
cF03058
cF03072
cF03074
cF03081
cF03082
cF03085
cF03086
cF03095
cF03097
cF03098
cF03099
cF03100
cF03101
cF03102
cF03103
cF03105
cF03106
cF03107
cF03110
cF03111
cF03112
cF03113
cF03114
cF03116
cF03117
cF03120
cF03121
cF03122
cF03123
cF03127
cF03128
cF03129
cF03130
cF03131
cF03132
cF03133
cF03134
cF03135
cF03136
cF03137
cF03138
cF03139
cF03140
cF03141
cF03154
cF03164
cF03166
cF03170
cF03177
cF03194
cF03195
cF03203
cF03207
cF03208
cF03209
cF03214
cF03217
cF03219
cF03220
cF03222
cF03223
cF03224
cF03229
cF03246
cF03254
cF03265
cF03272
cF03273
cF03274
cF03275
cF03276
cF03280
cF03287
cF03293
cF03294
cF03299
cF03308
cF03311
cF03312
cF03313
cF03314
cF03334
cF03373
cF03374
cF03375
cF03390
cF03395
cF03396
cF03397
cF03398
cF03399
cF03400
cF03401
cF03402
cF03403
cF03404
cF03407
cF03408
cF03409
cF03410
cF03411
cF03412
cF03413
cF03418
cF03421
cF03423
cF03426
cF03427
cF03439
cF03440
cF03441
cF03448
cF03458
cF03466
cF03467
cF03468
cF03473
cF03474
cF03492
cF03494
cF03514
cF03517
cF03533
cF03538
cF03556
cF03564
cF03578
cF03579
cF03595
cF03606
cF03608
cF03609
cF03610
cF03612
cF03614
cF03637
cF03643
cF03648
cF03662
cF03663
cF03679
cF03685
cF03687
cF03694
cF03695
cF03696
cF03708
cF03723
cF03735
cF03738
cF03745
cF03766
cF03775
cF03776
cF03778
cF03779
cF03780
cF03783
cF03800
cF03807
cF03815
cF03816
cF03827
cF03829
cF03830
cF03858
cF03863
cF03867
cF03868
cF03869
cF03872
cF03876
cF03879
cF03906
cF03911
cF03930
cF03931
cF03950
cF03961
cF03966
cF03969
cF03970
cF03980
cF03981
cF03990
cF03996
cF03997
cF03998
cF03999
cF04000
cF04001
cF04006
cF04007
cF04013
cF04014
cF04028
cF04036
cF04060
cF04061
cF04062
cF04076
cF04084
cF04106
cF04108
cF04109
cF04137
cF04142
cF04162
cF04163
cF04164
cF04165
cF04172
cF04196
cF04197
cF04209
cF04211
cF04212
cF04230
cF04234
cF04244
cF04249
cF04251
cF04264
cF04266
cF04267
cF04268
cF04269
cF04277
cF04280
cF04281
cF04302
cF04303
cF04312
cF04313
cF04318
cF04327
cF04333
cF04336
cF04337
cF04341
cF04342
cF04352
cF04354
cF04355
cF04356
cF04358
cF04367
cF04368
cF04380
cF04381
cF04386
cF04387
cF04388
cF04389
cF04396
cF04405
cF04407
cF04417
cF04420
cF04423
cF04434
cF04439
cF04440
cF04447
cF04448
cF04453
cF04458
cF04464
cF04472
cF04476
cF04492
cF04508
cF04509
cF04519
cF04528
cF04533
cF04563
cF04564
cF04568
cF04598
cF04604
cF04609
cF04633
cF04634
cF04636
cF04637
cF04638
cF04639
cF04640
cF04641
cF04642
cF04643
cF04644
cF04645
cF04646
cF04647
cF04648
cF04649
cF04654
cF04655
cF04656
cF04666
cF04667
cF04668
cF04669
cF04676
cF04681
cF04687
cF04688
cF04689
cF04690
cF04691
cF04704
cF04705
cF04715
cF04725
cF04753
cF04754
cF04761
cF04772
cF04773
cF04795
cF04804
cF04809
cF04818
cF04819
cF04820
cF04821
cF04822
cF04825
cF04828
cF04830
cF04831
cF04832
cF04848
cF04854
cF04855
cF04856
cF04857
cF04858
cF04860
cF04861
cF04862
cF04863
cF04864
cF04865
cF04866
cF04867
cF04870
cF04871
cF04872
cF04873
cF04875
cF04876
cF04878
cF04887
cF04888
cF04889
cF04890
cF04904
cF04911
cF04918
cF04919
cF04920
cF04952
cF04969
cF04980
cF04987
cF04995
cF04996
cF04997
cF04998
cF05006
cF05008
cF05009
cF05015
cF05019
cF05020
cF05021
cF05022
cF05023
cF05024
cF05025
cF05026
cF05030
cF05033
cF05034
cF05035
cF05037
cF05040
cF05042
cF05048
cF05064
cF05096
cF05097
cF05098
cF05099
cF05100
cF05116
cF05123
cF05124
cF05125
cF05129
cF05130
cF05131
cF05132
cF05137
cF05138
cF05140
cF05141
cF05142
cF05143
cF05144
cF05154
cF05155
cF05158
cF05160
cF05163
cF05190
cF05193
cF05194
cF05197
cF05198
cF05199
cF05200
cF05201
cF05202
cF05203
cF05204
cF05211
cF05212
cF05213
cF05214
cF05215
cF05216
cF05222
cF05225
cF05226
cF05266
cF05267
cF05268
cF05269
cF05270
cF05271
cF05272
cF05275
cF05280
cF05281
cF05283
cF05288
cF05289
cF05290
cF05297
cF05303
cF05304
cF05305
cF05306
cF05307
cF05317
cF05321
cF05322
cF05387
cF05394
cF05395
cF05396
cF05415
cF05416
cF05419
cF05420
cF05421
cF05422
cF05433
cF05444
cF05464
cF05478
cF05479
cF05488
cF05491
cF05492
cF05493
cF05494
cF05495
cF05496
cF05497
cF05498
cF05499
cF05505
cF05506
cF05508
cF05510
cF05514
cF05521
cF05522
cF05523
cF05524
cF05539
cF05547
cF05558
cF05572
cF05573
cF05575
cF05587
cF05588
cF05589
cF05591
cF05601
cF05602
cF05603
cF05606
cF05663
cF05668
cF05680
cF05683
cF05692
cF05694
cF05704
cF05706
cF05721
cF05736
cF05737
cF05774
cF05778
cF05784
cF05785
cF05786
cF05796
cF05807
cF05828
cF05833
cF05835
cF05837
cF05839
cF05840
cF05847
cF05848
cF05859
cF05863
cF05866
cF05867
cF05868
cF05869
cF05870
cF05871
cF05876
cF05880
cF05888
cF05889
cF05890
cF05893
cF05895
cF05902
cF05903
cF05913
cF05927
cF05929
cF05935
cF05936
cF05937
cF05942
cF05962
cF05963
cF05964
cF05969
cF05970
cF05979
cF05996
cF06003
cF06004
cF06006
cF06015
cF06016
cF06017
cF06018
cF06019
cF06020
cF06021
cF06035
cF06044
cF06045
cF06048
cF06049
cF06050
cF06062
cF06106
cF06109
cF06110
cF06111
cF06113
cF06121
cF06123
cF06129
cF06133
cF06138
cF06142
cF06183
cF06184
cF06185
cF06192
cF06202
cF06211
cF06214
cF06223
cF06231
cF06232
cF06233
cF06234
cF06235
cF06236
cF06253
cF06259
cF06267
cF06272
cF06302
cF06304
cF06308
cF06312
cF06316
cF06320
cF06324
cF06338
cF06339
cF06344
cF06351
cF06352
cF06385
cF06395
cF06402
cF06403
cF06414
cF06415
cF06416
cF06417
cF06418
cF06419
cF06420
cF06421
cF06438
cF06441
cF06446
cF06447
cF06448
cF06449
cF06450
cF06451
cF06481
cF06497
cF06498
cF06500
cF06527
cF06528
cF06529
cF06530
cF06531
cF06536
cF06537
cF06546
cF06547
cF06550
cF06558
cF06561
cF06572
cF06577
cF06578
cF06579
cF06580
cF06581
cF06582
cF06583
cF06584
cF06594
cF06597
cF06598
cF06599
cF06600
cF06601
cF06602
cF06603
cF06604
cF06605
cF06608
cF06609
cF06612
cF06614
cF06615
cF06617
cF06618
cF06619
cF06620
cF06621
cF06622
cF06624
cF06625
cF06626
cF06628
cF06634
cF06635
cF06639
cF06663
cF06669
cF06687
cF06688
cF06692
cF06693
cF06695
cF06705
cF06721
cF06722
cF06723
cF06724
cF06725
cF06726
cF06727
cF06728
cF06729
cF06730
cF06731
cF06732
cF06733
cF06734
cF06735
cF06750
cF06755
cF06759
cF06760
cF06761
cF06762
cF06763
cF06766
cF06767
cF06768
cF06787
cF06803
cF06804
cF06805
cF06807
cF06808
cF06809
cF06814
cF06815
cF06822
cF06836
cF06840
cF06847
cF06858
cF06864
cF06865
cF06872
cF06894
cF06899
cF06930
cF06931
cF06932
cF06947
cF06948
cF06949
cF06958
cF06959
cF06960
cF06965
cF06968
cF06982
cF06991
cF06992
cF07005
cF07031
cF07034
cF07042
cF07048
cF07052
cF07059
cF07060
cF07062
cF07065
cF07069
cF07070
cF07071
cF07073
cF07082
cF07083
cF07084
cF07099
cF07103
cF07110
cF07111
cF07122
cF07126
cF07127
cF07159
cF07160
cF07161
cF07162
cF07163
cF07164
cF07165
cF07173
cF07174
cF07183
cF07188
cF07191
cF07193
cF07207
cF07209
cF07212
cF07215
cF07221
cF07225
cF07240
cF07244
cF07252
cF07254
cF07255
cF07268
cF07280
cF07282
cF07287
cF07288
cF07289
cF07290
cF07293
cF07297
cF07304
cF07326
cF07358
cF07359
cF07360
cF07361
cF07362
cF07368
cF07372
cF07376
cF07380
cF07390
cF07391
cF07392
cF07393
cF07395
cF07396
cF07397
cF07398
cF07399
cF07400
cF07401
cF07402
cF07403
cF07404
cF07405
cF07406
cF07407
cF07408
cF07409
cF07410
cF07412
cF07413
cF07414
cF07415
cF07416
cF07417
cF07418
cF07419
cF07420
cF07421
cF07422
cF07423
cF07425
cF07426
cF07427
cF07428
cF07429
cF07430
cF07431
cF07432
cF07433
cF07434
cF07436
cF07437
cF07438
cF07439
cF07456
cF07461
cF07462
cF07463
cF07467
cF07468
cF07473
cF07474
cF07475
cF07476
cF07478
cF07508
cF07511
cF07534
cF07535
cF07543
cF07544
cF07545
cF07546
cF07547
cF07548
cF07549
cF07560
cF07568
cF07569
cF07576
cF07577
cF07578
cF07599
cF07600
cF07608
cF07616
cF07621
cF07633
cF07636
cF07637
cF07641
cF07658
cF07672
cF07673
cF07674
cF07691
cF07693
cF07694
cF07695
cF07698
cF07699
cF07700
cF07716
cF07717
cF07723
cF07724
cF07739
cF07740
cF07741
cF07742
cF07743
cF07744
cF07745
cF07746
cF07747
cF07748
cF07749
cF07801
cF07802
cF07803
cF07806
cF07815
cF07816
cF07818
cF07820
cF07821
cF07822
cF07835
cF07849
cF07854
cF07855
cF07856
cF07864
cF07865
cF07866
cF07867
cF07875
cF07894
cF07896
cF07897
cF07913
cF07933
cF07934
cF07937
cF07946
cF07952
cF07968
cF07969
cF07970
cF07973
cF07974
cF07975
cF07976
cF07985
cF07992
cF07997
cF08005
cF08022
cF08023
cF08024
cF08025
cF08026
cF08028
cF08029
cF08030
cF08031
cF08034
cF08035
cF08046
cF08047
cF08048
cF08049
cF08080
cF08097
cF08098
cF08099
cF08104
cF08105
cF08107
cF08108
cF08128
cF08137
cF08139
cF08144
cF08145
cF08146
cF08154
cF08157
cF08158
cF08186
cF08189
cF08195
cF08202
cF08204
cF08206
cF08207
cF08208
cF08209
cF08210
cF08221
cF08224
cF08227
cF08233
cF08234
cF08235
cF08237
cF08264
cF08270
cF08286
cF08291
cF08293
cF08294
cF08328
cF08339
cF08340
cF08345
cF08350
cF08365
cF08375
cF08376
cF08381
cF08382
cF08383
cF08384
cF08385
cF08387
cF08392
cF08393
cF08394
cF08395
cF08396
cF08397
cF08398
cF08402
cF08404
cF08406
cF08407
cF08408
cF08429
cF08448
cF08452
cF08465
cF08467
cF08475
cF08476
cF08482
cF08483
cF08494
cF08495
cF08496
cF08498
cF08501
cF08502
cF08503
cF08508
cF08514
cF08523
cF08533
cF08535
cF08536
cF08542
cF08549
cF08560
cF08561
cF08564
cF08565
cF08566
cF08568
cF08569
cF08570
cF08571
cF08573
cF08574
cF08575
cF08583
cF08588
cF08589
cF08590
cF08591
cF08592
cF08594
cF08600
cF08602
cF08603
cF08604
cF08627
cF08647
cF08648
cF08649
cF08650
cF08668
cF08676
cF08684
cF08688
cF08689
cF08691
cF08692
cF08693
cF08694
cF08704
cF08705
cF08706
cF08707
cF08708
cF08724
cF08739
cF08750
cF08755
cF08757
cF08787
cF08791
cF08792
cF08793
cF08794
cF08795
cF08802
cF08803
cF08812
cF08821
cF08827
cF08841
cF08842
cF08852
cF08856
cF08892
cF08895
cF08897
cF08898
cF08899
cF08902
cF08910
cF08936
cF08945
cF08951
cF08956
cF08957
cF08965
cF08967
cF08995
cF09007
cF09018
cF09022
cF09057
cF09066
cF09074
cF09081
cF09086
cF09094
cF09095
cF09096
cF09097
cF09098
cF09099
cF09108
cF09113
cF09119
cF09122
cF09126
cF09137
cF09138
cF09139
cF09142
cF09154
cF09176
cF09178
cF09190
cF09191
cF09224
cF09225
cF09226
cF09227
cF09236
cF09237
cF09248
cF09257
cF09261
cF09274
cF09280
cF09281
cF09285
cF09291
cF09292
cF09294
cF09301
cF09322
cF09343
cF09345
cF09358
cF09360
cF09361
cF09362
cF09363
cF09364
cF09368
cF09370
cF09371
cF09376
cF09377
cF09378
cF09379
cF09380
cF09381
cF09382
cF09384
cF09385
cF09386
cF09393
cF09402
cF09406
cF09424
cF09426
cF09451
cF09464
cF09472
cF09492
cF09493
cF09504
cF09511
cF09527
cF09535
cF09536
cF09539
cF09540
cF09548
cF09559
cF09567
cF09573
cF09587
cF09588
cF09595
cF09598
cF09601
cF09604
cF09631
cF09632
cF09637
cF09638
cF09639
cF09640
cF09645
cF09648
cF09649
cF09653
cF09655
cF09663
cF09664
cF09689
cF09690
cF09691
cF09692
cF09693
cF09697
cF09698
cF09715
cF09717
cF09720
cF09723
cF09725
cF09730
cF09731
cF09732
cF09733
cF09735
cF09741
cF09749
cF09759
cF09765
cF09766
cF09767
cF09770
cF09771
cF09781
cF09791
cF09796
cF09797
cF09798
cF09799
cF09800
cF09801
cF09802
cF09803
cF09804
cF09806
cF09813
cF09820
cF09821
cF09822
cF09828
cF09829
cF09830
cF09831
cF09835
cF09836
cF09837
cF09838
cF09839
cF09840
cF09841
cF09842
cF09843
cF09844
cF09860
cF09866
cF09867
cF09872
cF09874
cF09875
cF09876
cF09877
cF09878
cF09879
cF09880
cF09884
cF09885
cF09886
cF09887
cF09888
cF09905
cF09906
cF09907
cF09908
cF09909
cF09910
cF09911
cF09912
cF09918
cF09932
cF09933
cF09934
cF09943
cF09950
cF09966
cF09978
cF01971
cF06702
cF06701
cF05590
cF09873
cF09871
cF06756
cF06758
cF06757
cF06888
cF06889
cF06890
cF09832
cF09834
cF09833
cF09881
cF09883
cF09882
cF00076
cF02295
cF00079
cF04193
cF00492
cF06254
cF00654
cF00655
cF01089
cF05849
cF01189
cF08457
cF01380
cF07411
cF01505
cF04868
cF01989
cF07424
cF02590
cF03010
cF02652
cF02739
cF02906
cF08572
cF03026
cF07540
cF03104
cF09700
cF03118
cF03119
cF03292
cF05734
[truncated: 42 more rows]

## Sheet: S10
TableS10-annotation of the orphan genes in P. capitalensis
cF00006	148305.A4R840	1.4e-10	72	FG11038.1	GO:0008150,GO:0008152,GO:0019748,GO:0044710			fuNOG[21]	03Q66@ascNOG,0PM5Z@fuNOG,13MGU@opiNOG,19PXU@sordNOG,COG2124@NOG,KOG0158@euNOG	NA|NA|NA	Q	Cytochrome P450
cF00061	140110.NechaP77274	1.2e-38	166.8					fuNOG[21]	03SFP@ascNOG,0IWSV@euNOG,0PPIV@fuNOG,0SGPY@hypNOG,11TMC@NOG,13RSW@opiNOG,1A5R0@sordNOG	NA|NA|NA	S	Heterokaryon incompatibility protein (HET)
cF00071	36630.CADNFIAP00005723	2e-191	674.1		GO:0003674,GO:0003824,GO:0004091,GO:0008150,GO:0008152,GO:0016787,GO:0016788,GO:0052689	K03927		fuNOG[21]	03XHU@ascNOG,0MC7Q@euroNOG,0MMHW@eurotNOG,0PVER@fuNOG,141GS@opiNOG,COG2272@NOG,KOG1516@euNOG	NA|NA|NA	I	K03927 carboxylesterase 2 EC 3.1.1.1 3.1.1.84 3.1.1.56
cF00121	5022.CBX93347	4.8e-63	246.5					fuNOG[21]	03S2S@ascNOG,0H77Z@dotNOG,0PQ83@fuNOG,13K8W@opiNOG,15EWG@pleNOG,COG4122@NOG,KOG1663@euNOG	NA|NA|NA	Q	O-methyltransferase
cF00132	36630.CADNFIAP00001480	1.9e-102	377.5					fuNOG[21]	03R3H@ascNOG,0MAEW@euroNOG,0MR4D@eurotNOG,0PN2N@fuNOG,13QVZ@opiNOG,COG1028@NOG,KOG0725@euNOG	NA|NA|NA	Q	KR domain
cF00146	441959.XP_002341238.1	1e-22	113.2	FG03431.1				fuNOG[21]	03WGR@ascNOG,0MC0M@euroNOG,0MI4J@eurotNOG,0PMY7@fuNOG,13PY3@opiNOG,COG1454@NOG,KOG3857@euNOG	NA|NA|NA	C	Fe-containing alcohol dehydrogenase
cF00150	5022.CBX98571	1.3e-69	268.9	RRI1	GO:0000003,GO:0000338,GO:0000746,GO:0000747,GO:0000749,GO:0000754,GO:0003674,GO:0003824,GO:0004175,GO:0004222,GO:0004843,GO:0005575,GO:0005622,GO:0005623,GO:0005634,GO:0005737,GO:0005829,GO:0006464,GO:0008150,GO:0008152,GO:0008180,GO:0008233,GO:0008234,GO:0008237,GO:0009966,GO:0009987,GO:0010033,GO:0010388,GO:0010646,GO:0016787,GO:0019236,GO:0019538,GO:0019783,GO:0019953,GO:0023051,GO:0023058,GO:…	K09613		fuNOG[21]	03M8J@ascNOG,0H57P@dotNOG,0PIAJ@fuNOG,1374F@opiNOG,1579C@pleNOG,COG1310@NOG,KOG1554@euNOG	NA|NA|NA	O, T	Pfam:Mov34
cF00161	140110.NechaP56498	1.5e-17	96.7	AIM9	GO:0005575,GO:0005622,GO:0005623,GO:0005737,GO:0005739,GO:0043226,GO:0043227,GO:0043229,GO:0043231,GO:0044424,GO:0044444,GO:0044464	K01883		fuNOG[21]	03NFC@ascNOG,0IGT7@euNOG,0PIY2@fuNOG,0XR8W@NOG,12SVW@opiNOG,19M4E@sordNOG	NA|NA|NA	S	Phosphotransferase enzyme family
cF00183	13684.SNOT_03247	3.8e-10	71.2		GO:0000003,GO:0000975,GO:0000976,GO:0000977,GO:0000978,GO:0000981,GO:0000982,GO:0000987,GO:0001012,GO:0001067,GO:0001071,GO:0001159,GO:0003674,GO:0003676,GO:0003677,GO:0003700,GO:0005488,GO:0005575,GO:0005622,GO:0005623,GO:0005634,GO:0006139,GO:0006351,GO:0006355,GO:0006357,GO:0006366,GO:0006725,GO:0006807,GO:0007049,GO:0007126,GO:0008150,GO:0008152,GO:0009058,GO:0009059,GO:0009889,GO:0009891,GO:…			fuNOG[21]	03VGU@ascNOG,0H90G@dotNOG,0J7J5@euNOG,0PSSN@fuNOG,1299A@NOG,13X2W@opiNOG,15B4N@pleNOG	NA|NA|NA	K	Basic region leucine zipper
cF00199	13684.SNOT_10555	6.2e-51	208.8					fuNOG[21]	03UG8@ascNOG,0H8ZQ@dotNOG,0J0X2@euNOG,0PQT4@fuNOG,0Y06Y@NOG,13UKQ@opiNOG,15AUW@pleNOG	NA|NA|NA	S	Inherit from NOG: Conserved hypothetical, protein
cF00267	117187.FVEG_13433T0	1.5e-26	125.6	FG00028.1	GO:0003674,GO:0003824,GO:0005575,GO:0005576,GO:0008150,GO:0008152,GO:0008233,GO:0008237,GO:0016787,GO:0044046,GO:0044403,GO:0044419,GO:0051701,GO:0051704,GO:0052047,GO:0052048,GO:0052051,GO:0052211,GO:0070011	K07762		fuNOG[21]	03M8D@ascNOG,0IFMM@euNOG,0PIAE@fuNOG,0SCMB@hypNOG,0WXME@necNOG,0XPH7@NOG,1300I@opiNOG,1A3WT@sordNOG	NA|NA|NA	O	Pregnancy-associated plasma protein-A
cF00320	117187.FVEG_02452T0	5.7e-45	186.4			K17656		fuNOG[21]	03RR2@ascNOG,0IY6A@euNOG,0PNQR@fuNOG,0SBSP@hypNOG,0X0ES@necNOG,11SHN@NOG,14CPG@opiNOG,19MDJ@sordNOG	NA|NA|NA	S	Inherit from ascNOG: MYND finger
cF00332	164328.Phyra84465	2e-215	753.8					fuNOG[21]	COG2272@NOG,KOG1516@euNOG	NA|NA|NA	Q	Carboxylesterase
cF00344	5059.CADAFLAP00004147	1.8e-27	127.5	FG01533.1	GO:0003674,GO:0005215,GO:0005575,GO:0005622,GO:0005623,GO:0005737,GO:0005783,GO:0005789,GO:0006810,GO:0008150,GO:0009987,GO:0012505,GO:0016020,GO:0022857,GO:0031090,GO:0042175,GO:0043226,GO:0043227,GO:0043229,GO:0043231,GO:0044422,GO:0044424,GO:0044425,GO:0044432,GO:0044444,GO:0044446,GO:0044464,GO:0044699,GO:0044763,GO:0044765,GO:0051179,GO:0051234,GO:0055085			fuNOG[21]	03ICS@ascNOG,0M2GQ@euroNOG,0PGEU@fuNOG,0XS0P@NOG,12P0V@opiNOG,KOG1362@euNOG	NA|NA|NA	I	Plasma-membrane choline transporter
cF00349	13684.SNOT_02148	1.7e-21	110.2					fuNOG[21]	03V1J@ascNOG,0H8T1@dotNOG,0J2XK@euNOG,0PSJ6@fuNOG,12824@NOG,13X6H@opiNOG,15B6F@pleNOG	NA|NA|NA
cF00363	40559.EDN28674	8.4e-76	289.7					fuNOG[21]	03RFN@ascNOG,0IW28@euNOG,0PNB2@fuNOG,0YAIQ@NOG,13QV3@opiNOG	NA|NA|NA	S	C6 zinc finger domain-containing protein
cF00374	5059.CADAFLAP00005443	1.2e-93	348.6					fuNOG[21]	03SVX@ascNOG,0IYSQ@euNOG,0MECC@euroNOG,0MQFM@eurotNOG,0PPYC@fuNOG,11NEW@NOG,13SHP@opiNOG	NA|NA|NA	S	2OG-Fe(II) oxygenase superfamily
cF00397	148304.MAPG_06552T0	2.2e-42	179.1	FGSG_01293				fuNOG[21]	03MWP@ascNOG,0IJNF@euNOG,0PMB5@fuNOG,0U7RH@magNOG,0ZR79@NOG,13HAH@opiNOG,19ZYT@sordNOG	NA|NA|NA	K	C6 transcription factor Prf
cF00439	140110.NechaP73983	1.5e-69	269.6					fuNOG[21]	03YSF@ascNOG,0JAY3@euNOG,0PW88@fuNOG,0SCKK@hypNOG,11A73@NOG,1438R@opiNOG,19J02@sordNOG	NA|NA|NA	S	Heterokaryon incompatibility protein (HET)
cF00454	861557.XP_003297760.1	1.4e-44	186	FG01168.1	GO:0000228,GO:0000785,GO:0000790,GO:0005575,GO:0005622,GO:0005623,GO:0005634,GO:0005694,GO:0005737,GO:0005829,GO:0006325,GO:0006464,GO:0006479,GO:0006996,GO:0008150,GO:0008152,GO:0008213,GO:0009987,GO:0016043,GO:0016568,GO:0016569,GO:0016570,GO:0016571,GO:0019538,GO:0031974,GO:0031981,GO:0032259,GO:0036211,GO:0043170,GO:0043226,GO:0043227,GO:0043228,GO:0043229,GO:0043231,GO:0043232,GO:0043233,GO:…	K11426		fuNOG[21]	03RVB@ascNOG,0H8F4@dotNOG,0PP8F@fuNOG,13CUM@opiNOG,15CJJ@pleNOG,COG2940@NOG,KOG2084@euNOG	NA|NA|NA	B	Inherit from dotNOG: SET domain
cF00482	5507.FOXG_07159P0	1.6e-07	62					fuNOG[21]	03ZV5@ascNOG,0JCRY@euNOG,0PX66@fuNOG,0SKH2@hypNOG,0YK9G@NOG,145YV@opiNOG,1A2ZZ@sordNOG	NA|NA|NA	S	BTB
cF00581	559298.XP_002620707.1	2.2e-35	155.2					fuNOG[21]	03ZD6@ascNOG,0JBVS@euNOG,0MFNB@euroNOG,0PX1D@fuNOG,0YJCX@NOG,12KAH@onyNOG,144HF@opiNOG	NA|NA|NA	S	Phosphotransferase enzyme family
cF00621	140110.NechaP102094	3.5e-137	494.2	FG03772.1		K08165		fuNOG[21]	04DYS@ascNOG,0ISFA@euNOG,0QE3B@fuNOG,0SNW5@hypNOG,0X1PT@necNOG,0XQV1@NOG,13F1H@opiNOG,1A79H@sordNOG	NA|NA|NA	U	Major Facilitator Superfamily
cF00631	5022.CBX92935	2.2e-13	81.6					fuNOG[21]	03VZH@ascNOG,0H9SV@dotNOG,0J69B@euNOG,0PTMK@fuNOG,0Y0K9@NOG,13ZQJ@opiNOG,15EBD@pleNOG	NA|NA|NA
cF00674	559305.XP_003233742.1	1.7e-07	62.8					fuNOG[21]	02W52@arthNOG,03TJA@ascNOG,0J28N@euNOG,0MGBQ@euroNOG,0PRBE@fuNOG,0YRD2@NOG,12KP7@onyNOG,13VDS@opiNOG	NA|NA|NA
cF00682	554155.XP_002849646.1	7.8e-10	70.5					fuNOG[21]	03TJA@ascNOG,0J28N@euNOG,0MGBQ@euroNOG,0PRBE@fuNOG,0YRD2@NOG,12KP7@onyNOG,13VDS@opiNOG	NA|NA|NA
cF00687	5507.FOXG_05786P0	1.7e-179	636					fuNOG[21]	03MWD@ascNOG,0PKWG@fuNOG,0SMW8@hypNOG,13M7T@opiNOG,19K0F@sordNOG,COG0507@NOG,KOG0987@euNOG	NA|NA|NA	D	Inherit from sordNOG: conserved hypothetical protein
cF00706	140110.NechaP95122	5.7e-63	246.9			K14334		fuNOG[21]	03X9D@ascNOG,0J42E@euNOG,0PSU0@fuNOG,0SG8P@hypNOG,0WX8H@necNOG,125XJ@NOG,13X3R@opiNOG,19SBR@sordNOG	NA|NA|NA	S	Pfam:Muc_lac_enz
cF00712	500485.XP_002559222.1	1.9e-89	334.7		GO:0007275,GO:0008150,GO:0032501,GO:0032502,GO:0043581,GO:0044699,GO:0044707,GO:0044767,GO:0048856			fuNOG[21]	03PD5@ascNOG,0M46T@euroNOG,0MIB8@eurotNOG,0PHTQ@fuNOG,12S3A@opiNOG,COG0604@NOG,KOG1198@euNOG	NA|NA|NA	Q	alcohol dehydrogenase
cF00717	441960.XP_002146565.1	1.4e-17	96.7					fuNOG[21]	03M2E@ascNOG,0M6PE@euroNOG,0MH31@eurotNOG,0PKAU@fuNOG,12VZX@opiNOG,COG0666@NOG,COG0775@NOG,KOG0508@euNOG,KOG4177@euNOG	NA|NA|NA	M	Ankyrin repeat
cF00729	861557.XP_003301962.1	2.1e-13	81.6	FG02730.1				fuNOG[21]	03QFM@ascNOG,0H43S@dotNOG,0IEDP@euNOG,0PI1F@fuNOG,0ZC4B@NOG,13K09@opiNOG,158YV@pleNOG	NA|NA|NA	S	Cyclin
cF00737	339724.XP_001537419.1	3.1e-07	62					fuNOG[21]	042IA@ascNOG,0Q0K4@fuNOG,14EHH@opiNOG,COG2801@NOG,KOG0017@euNOG	NA|NA|NA	L	Inherit from KOG: Retrotransposon protein
cF00739	339724.XP_001537419.1	1.1e-10	73.2					fuNOG[21]	042IA@ascNOG,0Q0K4@fuNOG,14EHH@opiNOG,COG2801@NOG,KOG0017@euNOG	NA|NA|NA	L	Inherit from KOG: Retrotransposon protein
cF00798	426418.XP_001938787.1	8.2e-11	73.2					fuNOG[21]	0422N@ascNOG,0HAMU@dotNOG,0JH73@euNOG,0Q03T@fuNOG,0ZEYJ@NOG,14AY5@opiNOG,15DEV@pleNOG	NA|NA|NA
cF00821	29850.GGTG_13104T0	3.7e-14	84.7					fuNOG[21]	03ZZW@ascNOG,0JE0R@euNOG,0PXND@fuNOG,0U9AB@magNOG,0YMS3@NOG,146PN@opiNOG,19U1T@sordNOG	NA|NA|NA	S	Heterokaryon incompatibility protein (HET)
cF00906	5062.CADAORAP00009907	7.1e-19	100.1					fuNOG[21]	043US@ascNOG,0K0EI@euNOG,0MCVP@euroNOG,0MQQA@eurotNOG,0Q2AK@fuNOG,10AZG@NOG,14H21@opiNOG	NA|NA|NA	S	Phosphorylase superfamily
cF00907	5062.CADAORAP00009907	5.5e-12	77					fuNOG[21]	043US@ascNOG,0K0EI@euNOG,0MCVP@euroNOG,0MQQA@eurotNOG,0Q2AK@fuNOG,10AZG@NOG,14H21@opiNOG	NA|NA|NA	S	Phosphorylase superfamily
cF00909	5062.CADAORAP00009907	4.9e-08	63.5					fuNOG[21]	043US@ascNOG,0K0EI@euNOG,0MCVP@euroNOG,0MQQA@eurotNOG,0Q2AK@fuNOG,10AZG@NOG,14H21@opiNOG	NA|NA|NA	S	Phosphorylase superfamily
cF00910	5062.CADAORAP00009907	3.7e-13	80.9					fuNOG[21]	043US@ascNOG,0K0EI@euNOG,0MCVP@euroNOG,0MQQA@eurotNOG,0Q2AK@fuNOG,10AZG@NOG,14H21@opiNOG	NA|NA|NA	S	Phosphorylase superfamily
cF00914	5022.CBX91779	5.2e-35	152.9					fuNOG[21]	03U2C@ascNOG,0H9EQ@dotNOG,0J1IR@euNOG,0PQVS@fuNOG,0Y87S@NOG,13U91@opiNOG,15EEC@pleNOG	NA|NA|NA
cF00931	861557.XP_003297442.1	2.1e-20	105.9			K03006		fuNOG[21]	03YBM@ascNOG,0H9GP@dotNOG,0JA9S@euNOG,0PVWH@fuNOG,1192U@NOG,143ZA@opiNOG,15BG2@pleNOG	NA|NA|NA
cF00932	13684.SNOT_05216	1.4e-25	122.9			K03006		fuNOG[21]	03YBM@ascNOG,0H9GP@dotNOG,0JA9S@euNOG,0PVWH@fuNOG,1192U@NOG,143ZA@opiNOG,15BG2@pleNOG	NA|NA|NA
cF00973	1047171.EFQ25642	1.4e-41	175.6	PGUG_00637	GO:0000975,GO:0000976,GO:0000977,GO:0000978,GO:0000981,GO:0000982,GO:0000987,GO:0001012,GO:0001067,GO:0001071,GO:0001159,GO:0003674,GO:0003676,GO:0003677,GO:0003700,GO:0005488,GO:0005575,GO:0005622,GO:0005623,GO:0005634,GO:0005737,GO:0005829,GO:0006082,GO:0006139,GO:0006351,GO:0006355,GO:0006357,GO:0006366,GO:0006520,GO:0006725,GO:0006807,GO:0008150,GO:0008152,GO:0008270,GO:0009056,GO:0009058,GO:…			fuNOG[21]	03JTX@ascNOG,0IF1Q@euNOG,0PGPD@fuNOG,11H31@NOG,12Q4A@opiNOG	NA|NA|NA	K	Transcription factor
cF00974	140110.NechaP54138	4.3e-127	459.9		GO:0005575,GO:0005622,GO:0005623,GO:0005634,GO:0005737,GO:0005829,GO:0043226,GO:0043227,GO:0043229,GO:0043231,GO:0044424,GO:0044444,GO:0044464			fuNOG[21]	04DC2@ascNOG,0INGQ@euNOG,0QDDE@fuNOG,13BM6@opiNOG,COG0520@NOG	NA|NA|NA	E	pyridoxal phosphate binding
cF00977	861557.XP_003300366.1	7e-49	198.7					fuNOG[21]	049DS@ascNOG,0JAGV@euNOG,0PVM9@fuNOG,0XNZZ@NOG,142P7@opiNOG	NA|NA|NA	S	Inherit from NOG: methyltransferase like 13
cF00989	5022.CBX98827	1.4e-28	133.7	FG06851.1		K02155		fuNOG[21]	03UUD@ascNOG,0H8ZW@dotNOG,0J33F@euNOG,0PS4R@fuNOG,123XE@NOG,13XET@opiNOG,15BD0@pleNOG	NA|NA|NA	S	Inherit from ascNOG: Conserved hypothetical protein
cF01030	65071.PYU1_T014421	6.7e-13	81.3					fuNOG[21]	0XQ92@NOG,KOG1865@euNOG	NA|NA|NA	O	ubiquitin carboxyl-terminal hydrolase
cF01032	40559.EDN29472	5.4e-23	114	FG09279.1		K00799		fuNOG[21]	03PNG@ascNOG,0PM1A@fuNOG,13PBM@opiNOG,COG0625@NOG,KOG0867@euNOG	NA|NA|NA	O	Glutathione S-transferase, C-terminal domain
cF01040	559298.XP_002622758.1	4.9e-67	263.1	FG08058.1		K10801		fuNOG[21]	03MGA@ascNOG,0M6W5@euroNOG,0PKX1@fuNOG,11HPQ@NOG,12J4J@onyNOG,1378I@opiNOG,KOG4161@euNOG	NA|NA|NA	B, K	domain-containing protein 4
cF01064	1047171.EFQ29643	7.4e-14	84.3					fuNOG[21]	040TD@ascNOG,0H877@dotNOG,0IG58@euNOG,0PYH4@fuNOG,123YD@NOG,14CQ3@opiNOG	NA|NA|NA
cF01065	4113.PGSC0003DMT400089185	2e-11	75.9					fuNOG[21]	0J5TX@euNOG,121MC@NOG	NA|NA|NA
cF01067	5059.CADAFLAP00002010	2.5e-07	62.4	FG11152.1				fuNOG[21]	03ME7@ascNOG,0IVHG@euNOG,0MDHD@euroNOG,0MTRE@eurotNOG,0PIG5@fuNOG,110C3@NOG,13MWA@opiNOG	NA|NA|NA
cF01075	148304.MAPG_00101T0	1.4e-25	123.2					fuNOG[21]	03V28@ascNOG,0J2RH@euNOG,0PRX4@fuNOG,0UAIP@magNOG,1261H@NOG,13XJ4@opiNOG,19YG8@sordNOG	NA|NA|NA
cF01076	246410.XP_001245991.1	3.6e-10	73.2					fuNOG[21]	04005@ascNOG,0JE4U@euNOG,0M95V@euroNOG,0PY10@fuNOG,0ZBD2@NOG,12IBA@onyNOG,1464H@opiNOG	NA|NA|NA	S	Inherit from NOG: Conserved hypothetical, protein
cF01104	336963.XP_002540841.1	9.1e-40	169.5					fuNOG[21]	045JS@ascNOG,0KJ3P@euNOG,0MFNQ@euroNOG,0Q53X@fuNOG,10TR1@NOG,12JBF@onyNOG,132KF@opiNOG	NA|NA|NA
cF01105	441959.XP_002340131.1	1.8e-109	403.3					fuNOG[21]	04E98@ascNOG,0ISJ2@euNOG,0MH0Q@euroNOG,0QEFF@fuNOG,0XP3K@NOG,13F54@opiNOG	NA|NA|NA	S	WD domain, G-beta repeat
cF01188	306901.XP_001222442.1	1.5e-08	65.9					fuNOG[21]	03MZ3@ascNOG,0CWVP@chaNOG,0IKWJ@euNOG,0PJ0J@fuNOG,0YCUG@NOG,13PI6@opiNOG,19UHP@sordNOG,1AF2H@sorNOG	NA|NA|NA	S	BTB
cF01230	5061.CADANGAP00002717	1.8e-99	368.6		GO:0000028,GO:0003674,GO:0003676,GO:0003677,GO:0003697,GO:0003723,GO:0005488,GO:0005575,GO:0005622,GO:0005623,GO:0005634,GO:0005730,GO:0005737,GO:0005739,GO:0006139,GO:0006364,GO:0006396,GO:0006725,GO:0006807,GO:0006996,GO:0008150,GO:0008152,GO:0009987,GO:0010467,GO:0016043,GO:0016070,GO:0016072,GO:0022607,GO:0022613,GO:0022618,GO:0031974,GO:0031981,GO:0034470,GO:0034622,GO:0034641,GO:0034660,GO:…	K11294		fuNOG[21]	04DVS@ascNOG,0IRS8@euNOG,0QE01@fuNOG,11MZ2@NOG,13ECV@opiNOG	NA|NA|NA	A	nucleolin protein Nsr1
cF01255	140110.NechaP105880	2.8e-07	60.5	PPG1	GO:0000772,GO:0003674,GO:0005102,GO:0005186,GO:0005488,GO:0005515,GO:0005575,GO:0005576,GO:0008150,GO:0010033,GO:0019236,GO:0042221,GO:0050896			fuNOG[21]	03URS@ascNOG,0J2TW@euNOG,0PSW8@fuNOG,0SCCX@hypNOG,0X0YP@necNOG,113ZU@NOG,13Y2V@opiNOG,19SZQ@sordNOG	NA|NA|NA	S	Inherit from sordNOG: Pheromone
cF01264	426418.XP_001931556.1	1.9e-25	120.9	COF1	GO:0000910,GO:0000912,GO:0000915,GO:0003674,GO:0003779,GO:0005488,GO:0005515,GO:0005575,GO:0005622,GO:0005623,GO:0005634,GO:0005737,GO:0005856,GO:0005886,GO:0005938,GO:0006810,GO:0006886,GO:0006892,GO:0006893,GO:0006897,GO:0006996,GO:0007010,GO:0007015,GO:0007049,GO:0008092,GO:0008104,GO:0008150,GO:0008154,GO:0009987,GO:0015031,GO:0015629,GO:0016020,GO:0016043,GO:0016192,GO:0016363,GO:0016482,GO:…	K05765		fuNOG[21]	03T07@ascNOG,0H7GG@dotNOG,0PQ05@fuNOG,122P5@NOG,13TIS@opiNOG,15CIC@pleNOG,KOG1735@euNOG	NA|NA|NA	Z	Cofilin/tropomyosin-type actin-binding protein
cF01295	29850.GGTG_05568T0	1.4e-21	108.6					fuNOG[21]	03TAI@ascNOG,0J05C@euNOG,0PQAI@fuNOG,0UDZT@magNOG,11UWT@NOG,13TV1@opiNOG,19SGK@sordNOG	NA|NA|NA
cF01329	5085.CADAFUBP00000354	1.4e-17	95.1					fuNOG[21]	0YX07@NOG	NA|NA|NA	K	C6 transcription factor
cF01361	441960.XP_002149453.1	1.2e-19	103.2					fuNOG[21]	041IJ@ascNOG,0JHDN@euNOG,0PZ7E@fuNOG,0ZQ5S@NOG,149JB@opiNOG	NA|NA|NA
cF01421	162425.CADANIAP00008049	4.9e-28	131.7	FG01101.1				fuNOG[21]	03R9X@ascNOG,0IVYB@euNOG,0MDRD@euroNOG,0MHF8@eurotNOG,0PMZH@fuNOG,120MM@NOG,13QZ9@opiNOG	NA|NA|NA	S	pentatricopeptide repeat protein
cF01455	1047171.EFQ29350	6.3e-07	60.1	FG01269.1				fuNOG[21]	03W6Y@ascNOG,0J7C1@euNOG,0PTYB@fuNOG,11DSE@NOG,13ZZ2@opiNOG	NA|NA|NA
cF01467	573729.XP_003662485.1	4.6e-14	84.3					fuNOG[21]	03Z3G@ascNOG,0CX4C@chaNOG,0JBMG@euNOG,0PWRP@fuNOG,0YX8S@NOG,14485@opiNOG,19RN7@sordNOG,1AFNG@sorNOG	NA|NA|NA
cF01511	222929.XP_003069108.1	3.3e-14	84.3					fuNOG[21]	03ZPC@ascNOG,0JREN@euNOG,0M8NU@euroNOG,0PXBG@fuNOG,0ZMHH@NOG,12IN7@onyNOG,14FUJ@opiNOG	NA|NA|NA	S	BTB/POZ domain
cF01542	861557.XP_003302193.1	9.3e-39	164.9		GO:0005575,GO:0005622,GO:0005623,GO:0005737,GO:0005783,GO:0005789,GO:0012505,GO:0016020,GO:0031090,GO:0042175,GO:0043226,GO:0043227,GO:0043229,GO:0043231,GO:0044422,GO:0044424,GO:0044425,GO:0044432,GO:0044444,GO:0044446,GO:0044464			fuNOG[21]	03UGU@ascNOG,0H865@dotNOG,0PRGM@fuNOG,125SJ@NOG,13XE4@opiNOG,15CEC@pleNOG,KOG3472@euNOG	NA|NA|NA	S	Protein of unknown function (DUF423)
cF01576	5061.CADANGAP00008565	1.7e-53	217.2					fuNOG[21]	03PAA@ascNOG,0IHWB@euNOG,0PK7N@fuNOG,11DVC@NOG,12UC3@opiNOG	NA|NA|NA
cF01577	306901.XP_001229940.1	1.7e-22	111.7					fuNOG[21]	0400C@ascNOG,0PXNR@fuNOG,0YIPC@NOG,1463S@opiNOG,19VID@sordNOG,1ADZD@sorNOG,KOG2029@euNOG	NA|NA|NA	S	PGAP1-like protein
cF01578	39416.CAZ82123	2.1e-63	249.2	FG04177.1	GO:0007275,GO:0008150,GO:0032501,GO:0032502,GO:0043581,GO:0044699,GO:0044707,GO:0044767,GO:0048856			fuNOG[21]	03J53@ascNOG,0IEA6@euNOG,0PG6Z@fuNOG,12QXS@opiNOG,COG0464@NOG	NA|NA|NA	O	AAA family ATPase
cF01607	5022.CBY00511	2.5e-82	312			K10277		fuNOG[21]	03P3H@ascNOG,0H3TG@dotNOG,0PI7T@fuNOG,0XQDR@NOG,12PRY@opiNOG,1595W@pleNOG,KOG2132@euNOG	NA|NA|NA	B, T	Cupin superfamily protein
cF01611	140110.NechaP39197	1.2e-172	612.1					fuNOG[21]	03YFG@ascNOG,0IVHQ@euNOG,0PW4Y@fuNOG,0SIVX@hypNOG,0WUDG@necNOG,1425P@opiNOG,19JT0@sordNOG,COG0464@NOG	NA|NA|NA	O	ATPase family associated with various cellular activities (AAA)
cF01615	40559.EDN26745	6.3e-126	457.2					fuNOG[21]	03JA6@ascNOG,0PJQ6@fuNOG,12RUM@opiNOG,COG0666@NOG,KOG0504@euNOG	NA|NA|NA	T	NACHT domain
cF01616	40559.EDN26745	7.1e-79	300.8					fuNOG[21]	03JA6@ascNOG,0PJQ6@fuNOG,12RUM@opiNOG,COG0666@NOG,KOG0504@euNOG	NA|NA|NA	T	NACHT domain
cF01703	13684.SNOT_02124	1.2e-25	122.9	PGUG_03729	GO:0005575,GO:0005622,GO:0005623,GO:0005634,GO:0005737,GO:0005768,GO:0005829,GO:0006464,GO:0006810,GO:0008150,GO:0008152,GO:0009058,GO:0009987,GO:0016192,GO:0016197,GO:0017182,GO:0017183,GO:0018193,GO:0018202,GO:0019538,GO:0032456,GO:0032991,GO:0036211,GO:0043170,GO:0043226,GO:0043227,GO:0043229,GO:0043231,GO:0043234,GO:0043412,GO:0044237,GO:0044238,GO:0044249,GO:0044260,GO:0044267,GO:0044424,GO:…	K17868		fuNOG[21]	03IP9@ascNOG,0H78N@dotNOG,0PFR0@fuNOG,11MMJ@NOG,13KE9@opiNOG,1581E@pleNOG,KOG0280@euNOG	NA|NA|NA	E	Inherit from dotNOG: WD domain, G-beta repeat
cF01705	5061.CADANGAP00001493	1.9e-171	607.8			K10759		fuNOG[21]	03WDT@ascNOG,0J8QU@euNOG,0PU84@fuNOG,0YB71@NOG,140EQ@opiNOG	NA|NA|NA	O	Tannase and feruloyl esterase
cF01706	582744.Msip34_2639	9.6e-160	569.3					fuNOG[21]	08NVI@bactNOG,0BBQ5@bproNOG,11D0N@NOG,1725K@proNOG	NA|NA|NA
cF01711	13684.SNOT_04389	2.4e-09	69.7	FG01275.1	GO:0000166,GO:0000228,GO:0000785,GO:0000790,GO:0001882,GO:0001883,GO:0003674,GO:0003676,GO:0003677,GO:0003678,GO:0003824,GO:0004003,GO:0004386,GO:0005488,GO:0005524,GO:0005575,GO:0005622,GO:0005623,GO:0005634,GO:0005694,GO:0005737,GO:0005829,GO:0006139,GO:0006152,GO:0006163,GO:0006195,GO:0006200,GO:0006259,GO:0006325,GO:0006338,GO:0006725,GO:0006753,GO:0006793,GO:0006796,GO:0006807,GO:0006996,GO:…	K14439		fuNOG[21]	03K3M@ascNOG,0H5D2@dotNOG,0PG2X@fuNOG,0XNUT@NOG,12PN5@opiNOG,159SZ@pleNOG,KOG0389@euNOG	NA|NA|NA	B	SNF2 family N-terminal domain
cF01732	5507.FOXG_11712P0	8.9e-109	398.7	FG03954.1	GO:0000322,GO:0000323,GO:0000324,GO:0005575,GO:0005618,GO:0005622,GO:0005623,GO:0005737,GO:0005773,GO:0009277,GO:0030312,GO:0043226,GO:0043227,GO:0043229,GO:0043231,GO:0044424,GO:0044444,GO:0044464,GO:0071944			fuNOG[21]	03KQ8@ascNOG,0IF89@euNOG,0PHRJ@fuNOG,0SE56@hypNOG,0XPEP@NOG,12QE7@opiNOG,19KAR@sordNOG	NA|NA|NA	O	Inherit from ascNOG: metallopeptidase activity
cF01735	162425.CADANIAP00005665	3e-12	78.2	FG08935.1	GO:0000003,GO:0000030,GO:0000032,GO:0000746,GO:0000747,GO:0000749,GO:0000752,GO:0000771,GO:0003006,GO:0003674,GO:0003824,GO:0004169,GO:0005575,GO:0005622,GO:0005623,GO:0005634,GO:0005635,GO:0005737,GO:0005783,GO:0005789,GO:0005975,GO:0006056,GO:0006057,GO:0006464,GO:0006486,GO:0006493,GO:0006508,GO:0006511,GO:0006515,GO:0006810,GO:0006886,GO:0006950,GO:0007155,GO:0007157,GO:0007275,GO:0008104,GO:…	K00728		fuNOG[21]	03JCZ@ascNOG,0M664@euroNOG,0MINK@eurotNOG,0PFPS@fuNOG,12N7U@opiNOG,COG1928@NOG,KOG3359@euNOG	NA|NA|NA	O	mannosyltransferase 1
cF01768	641118.OINT_2000264	5.3e-77	293.1					fuNOG[21]	08VT0@bactNOG,17NEF@proNOG,COG0212@NOG	NA|NA|NA	H	5-formyltetrahydrofolate cyclo-ligase
cF01805	8083.ENSXMAP00000018635	3.9e-07	61.2					fuNOG[21]	0A0DX@biNOG,0DMS2@chorNOG,0N043@fiNOG,0VBA2@meNOG,13HAJ@opiNOG,1CWMP@veNOG,COG5048@NOG,KOG1721@euNOG	NA|NA|NA	K	MYC-associated zinc finger protein (purine-binding transcription factor)
cF01842	5141.EFNCRP00000005832	7.8e-36	156					fuNOG[21]	0JDJ0@euNOG,0PXMK@fuNOG,0YNK2@NOG,146E2@opiNOG	NA|NA|NA
cF01848	51453.JGI104334	4.2e-44	184.5					fuNOG[21]	03W1M@ascNOG,0J6CB@euNOG,0PTR0@fuNOG,0SCP1@hypNOG,0YU5Y@NOG,13ZFM@opiNOG,19TV5@sordNOG	NA|NA|NA
cF01849	51453.JGI104334	2.2e-74	285.4					fuNOG[21]	03W1M@ascNOG,0J6CB@euNOG,0PTR0@fuNOG,0SCP1@hypNOG,0YU5Y@NOG,13ZFM@opiNOG,19TV5@sordNOG	NA|NA|NA
cF01850	51453.JGI104334	8.9e-47	193.4					fuNOG[21]	03W1M@ascNOG,0J6CB@euNOG,0PTR0@fuNOG,0SCP1@hypNOG,0YU5Y@NOG,13ZFM@opiNOG,19TV5@sordNOG	NA|NA|NA
cF01861	40559.EDN29995	4.8e-69	268.9					fuNOG[21]	03PAA@ascNOG,0IHWB@euNOG,0PK7N@fuNOG,11DVC@NOG,12UC3@opiNOG	NA|NA|NA
cF01869	229533.XP_389322.1	3.8e-112	411.8	FG09146.1				fuNOG[21]	03WJE@ascNOG,0PV9V@fuNOG,140P8@opiNOG,19QUI@sordNOG,COG0666@NOG,KOG4177@euNOG	NA|NA|NA	M	NACHT domain
cF01874	5062.CADAORAP00003842	5e-96	358.6					fuNOG[21]	03RW7@ascNOG,0IXZ9@euNOG,0M5E8@euroNOG,0PNVZ@fuNOG,0XZJI@NOG,13RHH@opiNOG	NA|NA|NA	S	Inherit from ascNOG: Conserved hypothetical protein
cF01911	29875.EHK27167	3.2e-17	96.3	FG11061.1				fuNOG[21]	03RCJ@ascNOG,0IWNF@euNOG,0PMYE@fuNOG,0SHUY@hypNOG,11JV3@NOG,13QTS@opiNOG,19Q0B@sordNOG	NA|NA|NA	S	ZnF_C2H2
cF01912	13684.SNOT_10696	1.1e-38	166.8					fuNOG[21]	03UE8@ascNOG,0J1WF@euNOG,0PREH@fuNOG,0YKC7@NOG,13VJ0@opiNOG	NA|NA|NA
cF01913	246410.XP_001248895.1	5.1e-11	72.8					fuNOG[21]	03UE8@ascNOG,0J1WF@euNOG,0M8YI@euroNOG,0PREH@fuNOG,0YKC7@NOG,12INU@onyNOG,13VJ0@opiNOG	NA|NA|NA
cF01914	13684.SNOT_03439	2.3e-43	182.6	FG07430.1				fuNOG[21]	03TAK@ascNOG,0H7WT@dotNOG,0IZKV@euNOG,0PQ4V@fuNOG,11QTG@NOG,13T89@opiNOG,157ZB@pleNOG	NA|NA|NA
cF01925	554155.XP_002848813.1	1.5e-20	104.4	RPL39	GO:0002181,GO:0003674,GO:0003735,GO:0005198,GO:0005575,GO:0005622,GO:0005623,GO:0005737,GO:0005829,GO:0005840,GO:0006412,GO:0008150,GO:0008152,GO:0009058,GO:0009059,GO:0009987,GO:0010467,GO:0015934,GO:0019538,GO:0022625,GO:0022626,GO:0030529,GO:0032991,GO:0034645,GO:0043170,GO:0043226,GO:0043228,GO:0043229,GO:0043232,GO:0044237,GO:0044238,GO:0044249,GO:0044260,GO:0044267,GO:0044391,GO:0044422,GO:…	K02924		fuNOG[21]	031QN@arthNOG,03UJY@ascNOG,0M96U@euroNOG,0PRU9@fuNOG,12KD7@onyNOG,13W5W@opiNOG,COG2167@NOG,KOG0002@euNOG	NA|NA|NA	J	Ribosomal L39 protein
cF01932	5062.CADAORAP00006642	1.8e-165	588.6					fuNOG[21]	044TE@ascNOG,0JZRZ@euNOG,0MAC4@euroNOG,0MTEH@eurotNOG,0Q1DU@fuNOG,11YST@NOG,14HWX@opiNOG	NA|NA|NA
cF01933	246410.XP_001241826.1	9.2e-25	120.6					fuNOG[21]	03RW7@ascNOG,0IXZ9@euNOG,0M5E8@euroNOG,0PNVZ@fuNOG,0XZJI@NOG,12JUW@onyNOG,13RHH@opiNOG	NA|NA|NA	S	Inherit from ascNOG: Conserved hypothetical protein
cF01934	140110.NechaP77322	6.3e-126	456.4					fuNOG[21]	03T7C@ascNOG,0JN8P@euNOG,0PJS5@fuNOG,0ZHPW@NOG,13NDD@opiNOG,19RF1@sordNOG	NA|NA|NA	S	Transferase family
cF01935	5022.CBX97909	1.1e-18	99.4					fuNOG[21]	03ZI1@ascNOG,0H84T@dotNOG,0JCIC@euNOG,0PXDK@fuNOG,0YUNX@NOG,145K5@opiNOG,15EWI@pleNOG	NA|NA|NA
cF01936	29875.EHK15286	8.4e-11	72.8					fuNOG[21]	03SFC@ascNOG,0IXFU@euNOG,0PPHW@fuNOG,0SM5C@hypNOG,11PQJ@NOG,13SAP@opiNOG,19SH3@sordNOG	NA|NA|NA
cF01937	5022.CBX97909	3.4e-17	94.4					fuNOG[21]	03ZI1@ascNOG,0H84T@dotNOG,0JCIC@euNOG,0PXDK@fuNOG,0YUNX@NOG,145K5@opiNOG,15EWI@pleNOG	NA|NA|NA
cF01940	29875.EHK18396	4.9e-07	60.5					fuNOG[21]	03ZV5@ascNOG,0JCRY@euNOG,0PX66@fuNOG,0SKH2@hypNOG,0YK9G@NOG,145YV@opiNOG,1A2ZZ@sordNOG	NA|NA|NA	S	BTB
cF01944	1047171.EFQ31657	0	2164.4	FG10913.1	GO:0000255,GO:0000256,GO:0003674,GO:0003824,GO:0004039,GO:0004847,GO:0005575,GO:0005622,GO:0005623,GO:0005737,GO:0006807,GO:0008150,GO:0008152,GO:0009056,GO:0009987,GO:0016787,GO:0016810,GO:0016811,GO:0016874,GO:0016879,GO:0019627,GO:0034641,GO:0043419,GO:0043603,GO:0043605,GO:0044237,GO:0044248,GO:0044270,GO:0044281,GO:0044282,GO:0044424,GO:0044464,GO:0044710,GO:0044712,GO:0046483,GO:0046700,GO:…	K14541	ALPHNH,UREASE	fuNOG[21]	03IWC@ascNOG,0PHUI@fuNOG,12N20@opiNOG,COG0154@NOG,COG0439@NOG,COG1984@NOG,KOG0238@euNOG,KOG1211@euNOG	NA|NA|NA	E, I	carboxylase subunit alpha
cF01963	229533.XP_381577.1	2.5e-08	65.1	FG01401.1				fuNOG[21]	04BCN@ascNOG,0KNF7@euNOG,0Q9EE@fuNOG,0SF2U@hypNOG,0WY1I@necNOG,10XI3@NOG,1380F@opiNOG,1A33V@sordNOG	NA|NA|NA
cF01965	486041.XP_001879444.1	2.7e-34	151			K03469		fuNOG[21]	01APZ@agaNOG,01GBZ@agarNOG,0976S@basNOG,0PY79@fuNOG,1483G@opiNOG,COG0328@NOG,KOG3752@euNOG	NA|NA|NA	L	Pfam:RnaseH
cF01967	486041.XP_001879444.1	1.6e-26	125.2			K03469		fuNOG[21]	01APZ@agaNOG,01GBZ@agarNOG,0976S@basNOG,0PY79@fuNOG,1483G@opiNOG,COG0328@NOG,KOG3752@euNOG	NA|NA|NA	L	Pfam:RnaseH
cF01968	5062.CADAORAP00005623	4e-48	198.7					fuNOG[21]	03M17@ascNOG,0IV0J@euNOG,0M460@euroNOG,0PI2E@fuNOG,0YBP8@NOG,13JKM@opiNOG	NA|NA|NA	S	Inherit from ascNOG: Conserved hypothetical protein
cF01970	578458.XP_003026237.1	9.5e-23	112.8			K03469		fuNOG[21]	01APZ@agaNOG,01GBZ@agarNOG,0976S@basNOG,0PY79@fuNOG,1483G@opiNOG,COG0328@NOG,KOG3752@euNOG	NA|NA|NA	L	Pfam:RnaseH
cF01981	663331.XP_003012862.1	7.9e-108	397.1					fuNOG[21]	02X2Y@arthNOG,03M17@ascNOG,0IV0J@euNOG,0M460@euroNOG,0PI2E@fuNOG,0YBP8@NOG,12HYG@onyNOG,13JKM@opiNOG	NA|NA|NA	S	Inherit from ascNOG: Conserved hypothetical protein
cF02011	5022.CBX99448	4.1e-33	147.9					fuNOG[21]	03S59@ascNOG,0H7X6@dotNOG,0IXUE@euNOG,0PP45@fuNOG,0YM10@NOG,13S80@opiNOG,15CUF@pleNOG	NA|NA|NA	S	Phosphotransferase enzyme family
cF02032	29875.EHK17762	8.7e-20	103.2					fuNOG[21]	040Q3@ascNOG,0JFSB@euNOG,0PYW4@fuNOG,114AS@NOG,14920@opiNOG,19TE5@sordNOG	NA|NA|NA
cF02033	29875.EHK17762	7.1e-12	77.8					fuNOG[21]	040Q3@ascNOG,0JFSB@euNOG,0PYW4@fuNOG,114AS@NOG,14920@opiNOG,19TE5@sordNOG	NA|NA|NA
cF02071	148304.MAPG_02401T0	3.5e-37	161.4		GO:0005575,GO:0005622,GO:0005623,GO:0005634,GO:0005737,GO:0005739,GO:0005829,GO:0006950,GO:0006979,GO:0008150,GO:0009987,GO:0033554,GO:0034599,GO:0042221,GO:0043226,GO:0043227,GO:0043229,GO:0043231,GO:0044424,GO:0044444,GO:0044464,GO:0044699,GO:0044763,GO:0050896,GO:0051716,GO:0070887	K10581		fuNOG[21]	03TRV@ascNOG,0J0IT@euNOG,0PSUB@fuNOG,0U875@magNOG,124TH@NOG,13X4E@opiNOG,19X3V@sordNOG	NA|NA|NA	S	Poly(ADP-ribose) polymerase and DNA-Ligase Zn-finger region
cF02093	29850.GGTG_09929T0	4e-32	145.2					fuNOG[21]	03Z5X@ascNOG,0JBZF@euNOG,0PWU7@fuNOG,0YIQ5@NOG,144MM@opiNOG,19S2Q@sordNOG	NA|NA|NA	S	Heterokaryon incompatibility protein (HET)
cF02094	5022.CBX98682	7.9e-68	263.5					fuNOG[21]	040CW@ascNOG,0H975@dotNOG,0JE9G@euNOG,0PXYY@fuNOG,0YMU3@NOG,146SZ@opiNOG,15DRF@pleNOG	NA|NA|NA	S	Fungal specific transcription factor domain
cF02095	13684.SNOT_10891	6.6e-115	419.1					fuNOG[21]	0JAVQ@euNOG,0PVM5@fuNOG,100FS@NOG,1424D@opiNOG	NA|NA|NA	S	Phytanoyl-CoA dioxygenase (PhyH)
cF02146	7739.JGI168563	1.2e-14	86.7					fuNOG[21]	0XR01@NOG,KOG0595@euNOG	NA|NA|NA	T	Unc51-like kinase
cF02147	148304.MAPG_10055T0	4e-09	67					fuNOG[21]	049AJ@ascNOG,0KKC2@euNOG,0Q6NZ@fuNOG,0UF4E@magNOG,117HV@NOG,13612@opiNOG,19WXP@sordNOG	NA|NA|NA
cF02166	500485.XP_002568630.1	1e-27	131	FG06801.1	GO:0000075,GO:0003674,GO:0003824,GO:0005575,GO:0005622,GO:0005623,GO:0005634,GO:0006139,GO:0006259,GO:0006276,GO:0006323,GO:0006464,GO:0006725,GO:0006807,GO:0006996,GO:0007049,GO:0007088,GO:0007093,GO:0007094,GO:0007346,GO:0008150,GO:0008152,GO:0008233,GO:0008234,GO:0009987,GO:0010564,GO:0010639,GO:0010948,GO:0016043,GO:0016787,GO:0016926,GO:0016929,GO:0019538,GO:0019783,GO:0022402,GO:0030071,GO:…	K08596		fuNOG[21]	03K6C@ascNOG,0M2VG@euroNOG,0MJ5A@eurotNOG,0PNYF@fuNOG,13R4U@opiNOG,COG5160@NOG,KOG0779@euNOG	NA|NA|NA	O	Ulp1 protease family
cF02222	5141.EFNCRP00000007510	7.9e-36	157.9					fuNOG[21]	046Q7@ascNOG,0KJYX@euNOG,0Q667@fuNOG,10UE7@NOG,133P3@opiNOG,19V5V@sordNOG,1AEC2@sorNOG	NA|NA|NA	S	Heterokaryon incompatibility protein (HET)
cF02227	861557.XP_003301465.1	6.6e-106	390.2					fuNOG[21]	03PI5@ascNOG,0H6TK@dotNOG,0PJ6X@fuNOG,12SF8@opiNOG,15E1H@pleNOG,COG2303@NOG,KOG1238@euNOG	NA|NA|NA	E	GMC oxidoreductase
cF02241	140110.NechaP102252	1.4e-07	63.5					fuNOG[21]	03TN3@ascNOG,0J25K@euNOG,0PQZF@fuNOG,0SMSE@hypNOG,0YX32@NOG,13VJZ@opiNOG,19T2A@sordNOG	NA|NA|NA
cF02244	140110.NechaP88973	7.2e-07	60.8					fuNOG[21]	03TN3@ascNOG,0J25K@euNOG,0PQZF@fuNOG,0SMSE@hypNOG,0YX32@NOG,13VJZ@opiNOG,19T2A@sordNOG	NA|NA|NA
cF02250	426418.XP_001939456.1	2.8e-17	95.5					fuNOG[21]	04CEM@ascNOG,0HAVE@dotNOG,0IM3W@euNOG,0QCX8@fuNOG,1122X@NOG,139XK@opiNOG,15E2P@pleNOG	NA|NA|NA
cF02282	148304.MAPG_01824T0	2e-21	108.6					fuNOG[21]	03TVH@ascNOG,0IMIW@euNOG,0PMR4@fuNOG,0UDMW@magNOG,11SIS@NOG,13JY4@opiNOG,19Z2V@sordNOG	NA|NA|NA	S	MYND finger
cF02283	140110.NechaP55208	8.8e-10	69.7					fuNOG[21]	03XDD@ascNOG,0PV4P@fuNOG,142GM@opiNOG,19U4W@sordNOG,COG0328@NOG,KOG3752@euNOG	NA|NA|NA	L	Pfam:RnaseH
cF02311	5085.CADAFUBP00009427	2.6e-73	282		GO:0000947,GO:0000955,GO:0003674,GO:0003824,GO:0004022,GO:0005575,GO:0005622,GO:0005623,GO:0005634,GO:0005737,GO:0005975,GO:0005996,GO:0006006,GO:0006007,GO:0006066,GO:0006067,GO:0006082,GO:0006091,GO:0006113,GO:0006115,GO:0006116,GO:0006139,GO:0006520,GO:0006725,GO:0006732,GO:0006733,GO:0006734,GO:0006753,GO:0006793,GO:0006796,GO:0006807,GO:0008150,GO:0008152,GO:0009056,GO:0009058,GO:0009063,GO:…	K13953	ALCD22xi,ALCD23xi,ALCD24xi,ALCD25xi,ALCD26xi,ALCD2ir,ALCD2x	fuNOG[21]	03NZI@ascNOG,0M6FE@euroNOG,0PMH2@fuNOG,13NBN@opiNOG,COG1064@NOG,KOG0023@euNOG	NA|NA|NA	Q	NADP-dependent alcohol dehydrogenase
cF02324	5061.CADANGAP00004352	1.1e-23	116.3					fuNOG[21]	03PB6@ascNOG,0IJ5R@euNOG,0MDIA@euroNOG,0MT3W@eurotNOG,0PKZZ@fuNOG,0Y7GR@NOG,13NDX@opiNOG	NA|NA|NA
cF02325	5061.CADANGAP00004352	4.3e-37	161					fuNOG[21]	03PB6@ascNOG,0IJ5R@euNOG,0MDIA@euroNOG,0MT3W@eurotNOG,0PKZZ@fuNOG,0Y7GR@NOG,13NDX@opiNOG	NA|NA|NA
cF02363	5057.CADACLAP00007411	1.3e-88	334.3	FG09106.1				fuNOG[21]	03UWG@ascNOG,0J2NX@euNOG,0PS70@fuNOG,12BQI@NOG,13Y3C@opiNOG	NA|NA|NA
cF02382	117187.FVEG_11217T0	1.6e-98	366.3					fuNOG[21]	03IQR@ascNOG,0IE3T@euNOG,0PFS2@fuNOG,0SJ7V@hypNOG,0Y90Y@NOG,13NH6@opiNOG,19QGK@sordNOG	NA|NA|NA	S	Subtilase family
cF02383	5507.FOXG_13785P0	1e-67	262.3					fuNOG[21]	03Z0K@ascNOG,0JBK1@euNOG,0PWNQ@fuNOG,0SIEU@hypNOG,0YJ9V@NOG,1446W@opiNOG,19RBG@sordNOG	NA|NA|NA
cF02384	5722.A2FE09	8.2e-56	224.9					fuNOG[21]	COG0666@NOG,KOG4177@euNOG	NA|NA|NA	M	Ankyrin Repeat Protein
cF02425	36630.CADNFIAP00003171	6.1e-162	576.2	AIM9	GO:0005575,GO:0005622,GO:0005623,GO:0005737,GO:0005739,GO:0043226,GO:0043227,GO:0043229,GO:0043231,GO:0044424,GO:0044444,GO:0044464			fuNOG[21]	03NFC@ascNOG,0IGT7@euNOG,0M617@euroNOG,0MPGQ@eurotNOG,0PIY2@fuNOG,0XR8W@NOG,12SVW@opiNOG	NA|NA|NA	S	Inherit from euroNOG: Phosphotransferase enzyme family
cF02426	426418.XP_001938583.1	4.2e-87	327.4					fuNOG[21]	03Y1J@ascNOG,0JNJF@euNOG,0Q08U@fuNOG,0YBCY@NOG,14CZ9@opiNOG	NA|NA|NA
cF02428	441959.XP_002483462.1	1.9e-17	96.3					fuNOG[21]	03T22@ascNOG,0IZZM@euNOG,0M5TU@euroNOG,0MPGU@eurotNOG,0PPQP@fuNOG,0YADH@NOG,13TG2@opiNOG	NA|NA|NA	S	Ankyrin and HET domain protein
cF02429	148304.MAPG_08750T0	2.8e-18	99					fuNOG[21]	03ZPN@ascNOG,0JD8B@euNOG,0PXI1@fuNOG,0UB28@magNOG,11A4J@NOG,145V0@opiNOG,19SAZ@sordNOG	NA|NA|NA	S	Heterokaryon incompatibility protein (HET)
cF02430	5507.FOXG_05867P0	3.1e-20	106.3	FG09350.1				fuNOG[21]	049H6@ascNOG,0KPUT@euNOG,0QB7H@fuNOG,0SJJ7@hypNOG,10W6H@NOG,1366T@opiNOG,1A6W5@sordNOG	NA|NA|NA	S	Heterokaryon incompatibility protein (HET)
cF02431	13684.SNOT_02081	3.1e-11	75.1	FGSG_08536	GO:0000184,GO:0000375,GO:0000377,GO:0000398,GO:0000956,GO:0003674,GO:0003676,GO:0003677,GO:0003723,GO:0005488,GO:0005575,GO:0005622,GO:0005623,GO:0005634,GO:0005654,GO:0005681,GO:0005737,GO:0005829,GO:0006139,GO:0006355,GO:0006396,GO:0006397,GO:0006401,GO:0006402,GO:0006725,GO:0006807,GO:0007275,GO:0008150,GO:0008152,GO:0008380,GO:0009056,GO:0009057,GO:0009889,GO:0009891,GO:0009893,GO:0009987,GO:…	K14325		fuNOG[21]	03TST@ascNOG,0H896@dotNOG,0PRD5@fuNOG,11PFV@NOG,13V6R@opiNOG,15EIX@pleNOG,KOG4209@euNOG	NA|NA|NA	A	RNA recognition motif. (a.k.a. RRM, RBD, or RNP domain)
cF02454	117187.FVEG_09362T0	6.9e-07	61.2					fuNOG[21]	03TRC@ascNOG,0J4NZ@euNOG,0PR94@fuNOG,0SGI4@hypNOG,0WZNR@necNOG,0YMNF@NOG,13VVR@opiNOG,1A5HN@sordNOG	NA|NA|NA
cF02460	117187.FVEG_09362T0	2.3e-10	71.6					fuNOG[21]	03TRC@ascNOG,0J4NZ@euNOG,0PR94@fuNOG,0SGI4@hypNOG,0WZNR@necNOG,0YMNF@NOG,13VVR@opiNOG,1A5HN@sordNOG	NA|NA|NA
cF02492	222929.XP_003066734.1	7.4e-23	114	FG02965.1				fuNOG[21]	03VHZ@ascNOG,0J4RD@euNOG,0M2W0@euroNOG,0PSW1@fuNOG,0YH93@NOG,12J84@onyNOG,13XRJ@opiNOG	NA|NA|NA
cF02501	441960.XP_002152343.1	2e-65	255.8	FG03364.1				fuNOG[21]	03YH7@ascNOG,0J9Z6@euNOG,0MBMJ@euroNOG,0MS5S@eurotNOG,0PWKF@fuNOG,140ZF@opiNOG,COG1680@NOG	NA|NA|NA	V	penicillin-binding protein
cF02502	426418.XP_001940542.1	6e-33	148.3					fuNOG[21]	03V45@ascNOG,0HA61@dotNOG,0J2Y2@euNOG,0PT52@fuNOG,123XX@NOG,13Y8V@opiNOG,15D7E@pleNOG	NA|NA|NA
cF02530	667129.HMPREF0758_5083	8.3e-36	157.5					fuNOG[21]	05C0D@bactNOG,0QK02@gproNOG,16QPP@proNOG,COG0553@NOG	NA|NA|NA	L	Helicase
cF02573	426418.XP_001932277.1	2e-32	145.6					fuNOG[21]	040Z0@ascNOG,0H5P7@dotNOG,0J4DM@euNOG,0PYEH@fuNOG,128E0@NOG,148BP@opiNOG,15D8T@pleNOG	NA|NA|NA
cF02619	13684.SNOT_08512	2.8e-29	136.3		GO:0007275,GO:0008150,GO:0032501,GO:0032502,GO:0043581,GO:0044699,GO:0044707,GO:0044767,GO:0048856			fuNOG[21]	03VGW@ascNOG,0H8DM@dotNOG,0PSAC@fuNOG,12RNR@opiNOG,159J9@pleNOG,COG5160@NOG,KOG0778@euNOG	NA|NA|NA	O	Ulp1 protease family, C-terminal catalytic domain
cF02662	771870.XP_003350347.1	1.3e-92	345.5	FG03965.1				fuNOG[21]	03QJ1@ascNOG,0IY36@euNOG,0PMIC@fuNOG,13P7T@opiNOG,19S9U@sordNOG,1AER5@sorNOG,COG2159@NOG	NA|NA|NA	S	Amidohydrolase
cF02665	140110.NechaP82889	6e-08	65.1					fuNOG[21]	04BTN@ascNOG,0KN3P@euNOG,0Q8ZT@fuNOG,0SMZI@hypNOG,0X14E@necNOG,10XV5@NOG,138EY@opiNOG,1A27F@sordNOG	NA|NA|NA
cF02736	554155.XP_002850242.1	2.3e-13	82.4					fuNOG[21]	03U3N@ascNOG,0J21J@euNOG,0M8C6@euroNOG,0PR8B@fuNOG,0YM4R@NOG,12IMF@onyNOG,13V8F@opiNOG	NA|NA|NA	S	Inherit from ascNOG: Conserved hypothetical protein
cF02760	441959.XP_002486084.1	1.3e-16	93.6	MAT1-1-1	GO:0000003,GO:0003006,GO:0005575,GO:0005622,GO:0005623,GO:0005634,GO:0007049,GO:0008150,GO:0009653,GO:0009987,GO:0019953,GO:0022402,GO:0022413,GO:0022414,GO:0030154,GO:0030435,GO:0030437,GO:0032502,GO:0032505,GO:0034293,GO:0043226,GO:0043227,GO:0043229,GO:0043231,GO:0043934,GO:0043935,GO:0044424,GO:0044464,GO:0044699,GO:0044763,GO:0044767,GO:0048468,GO:0048610,GO:0048646,GO:0048856,GO:0048869			fuNOG[21]	03VC1@ascNOG,0J3Y3@euNOG,0M8G3@euroNOG,0MNPE@eurotNOG,0PSWZ@fuNOG,0YVGY@NOG,13XIT@opiNOG	NA|NA|NA	K	Mating-type protein
cF02803	441960.XP_002146950.1	1.4e-09	69.3					fuNOG[21]	04477@ascNOG,0K063@euNOG,0MBYB@euroNOG,0MPCY@eurotNOG,0Q1Z3@fuNOG,10B7C@NOG,14HCY@opiNOG	NA|NA|NA	S	Phospholipase/Carboxylesterase
cF02808	441959.XP_002480253.1	1.1e-48	198					fuNOG[21]	03RT8@ascNOG,0IX4R@euNOG,0M9U8@euroNOG,0MNIN@eurotNOG,0PNTF@fuNOG,13RKZ@opiNOG,COG3791@NOG	NA|NA|NA	S	DUF636 domain protein
cF02816	5022.CBX96675	7.2e-37	161	FG06109.1				fuNOG[21]	03TEA@ascNOG,0H8JB@dotNOG,0IZET@euNOG,0PQGD@fuNOG,121J3@NOG,13TB4@opiNOG,157YE@pleNOG	NA|NA|NA	S	COMPASS (Complex proteins associated with Set1p) component shg1
cF02846	500485.XP_002566168.1	2.7e-64	251.5					fuNOG[21]	03W7A@ascNOG,0J58K@euNOG,0PTZB@fuNOG,0XTUI@NOG,13Z23@opiNOG	NA|NA|NA
cF02862	140110.NechaP88069	9.1e-48	196.4					fuNOG[21]	03J7F@ascNOG,0IEB5@euNOG,0PG94@fuNOG,0SF99@hypNOG,0WUBN@necNOG,0YCY4@NOG,13KCD@opiNOG,1A3UX@sordNOG	NA|NA|NA	T	Inherit from ascNOG: Heterokaryon incompatibility protein (HET)
cF02875	426418.XP_001941053.1	1.8e-81	309.7	FG02363.1				fuNOG[21]	03TGC@ascNOG,0HBGR@dotNOG,0IZXK@euNOG,0PQBF@fuNOG,0Y4HB@NOG,13STD@opiNOG,15DCF@pleNOG	NA|NA|NA
cF02910	861557.XP_003301276.1	8.5e-22	110.5		GO:0000002,GO:0003674,GO:0003676,GO:0003677,GO:0003824,GO:0004518,GO:0004519,GO:0004520,GO:0004536,GO:0005488,GO:0005575,GO:0005622,GO:0005623,GO:0005737,GO:0005739,GO:0006139,GO:0006259,GO:0006310,GO:0006725,GO:0006807,GO:0006996,GO:0007005,GO:0008150,GO:0008152,GO:0008821,GO:0009987,GO:0016043,GO:0016787,GO:0016788,GO:0016889,GO:0016894,GO:0034641,GO:0043170,GO:0043226,GO:0043227,GO:0043229,GO:…	K17676		fuNOG[21]	03T8J@ascNOG,0HB5M@dotNOG,0IZM4@euNOG,0PQH1@fuNOG,0XX2S@NOG,13TW5@opiNOG,15BNG@pleNOG	NA|NA|NA	S	Mitochondrial resolvase Ydc2 / RNA splicing MRS1
cF02927	1047171.EFQ35650	6.9e-10	68.2					fuNOG[21]	03TUB@ascNOG,0H82I@dotNOG,0J0SG@euNOG,0PQUX@fuNOG,11VFK@NOG,13UIH@opiNOG	NA|NA|NA	S	Dabb
cF02929	861557.XP_003301889.1	1e-65	256.5					fuNOG[21]	03RVH@ascNOG,0IXRZ@euNOG,0PPA0@fuNOG,0YB2U@NOG,13RKX@opiNOG	NA|NA|NA
cF02965	5518.FGSG_13128P0	7.7e-15	84.7			K17771		fuNOG[21]	03V0W@ascNOG,0J3KJ@euNOG,0PSCC@fuNOG,122H5@NOG,13WCR@opiNOG,19TTU@sordNOG	NA|NA|NA	S	TOM7 family
cF02999	13684.SNOT_05847	1.7e-11	76.3					fuNOG[21]	04C5S@ascNOG,0HBG5@dotNOG,0IMC2@euNOG,0QD5S@fuNOG,111VC@NOG,139NK@opiNOG,15E1R@pleNOG	NA|NA|NA
cF03000	861557.XP_003300636.1	6.5e-08	64.3					fuNOG[21]	04C5S@ascNOG,0HBG5@dotNOG,0IMC2@euNOG,0QD5S@fuNOG,111VC@NOG,139NK@opiNOG,15E1R@pleNOG	NA|NA|NA
cF03002	40559.EDN28308	7.6e-62	244.6	FG11370.1				fuNOG[21]	03T7Q@ascNOG,0J7Z9@euNOG,0PQAB@fuNOG,13SYY@opiNOG,COG0666@NOG	NA|NA|NA	S	Inherit from COG: Ankyrin Repeat
cF03081	5059.CADAFLAP00007982	5.5e-19	102.1					fuNOG[21]	03RHS@ascNOG,0IWVW@euNOG,0M2Q5@euroNOG,0PNGM@fuNOG,11SYN@NOG,13QQJ@opiNOG	NA|NA|NA	S	NACHT domain
cF03114	5061.CADANGAP00005274	1.9e-40	171.4					fuNOG[21]	03VDH@ascNOG,0J3G3@euNOG,0PSHX@fuNOG,0XV98@NOG,13WXS@opiNOG	NA|NA|NA	S	LysM domain
cF03164	229533.XP_388019.1	3.3e-08	65.1	FG07843.1				fuNOG[21]	041B2@ascNOG,0JMZA@euNOG,0PZ0U@fuNOG,0SKY0@hypNOG,0WZ4J@necNOG,0Z2VA@NOG,14CB4@opiNOG,1A28E@sordNOG	NA|NA|NA
cF03166	5180.EDO03802	2.1e-79	301.6	ENT3	GO:0000147,GO:0003674,GO:0005488,GO:0005515,GO:0005543,GO:0005546,GO:0005575,GO:0005622,GO:0005623,GO:0005634,GO:0005737,GO:0005794,GO:0005856,GO:0005886,GO:0005905,GO:0005938,GO:0006810,GO:0006892,GO:0006895,GO:0006897,GO:0006950,GO:0006996,GO:0007010,GO:0007015,GO:0007034,GO:0007154,GO:0007165,GO:0007166,GO:0007167,GO:0007169,GO:0007173,GO:0008150,GO:0008289,GO:0009636,GO:0009966,GO:0009968,GO:…	K12471		fuNOG[21]	03IZZ@ascNOG,0PJ8R@fuNOG,0XSM0@NOG,12PYK@opiNOG,KOG2056@euNOG	NA|NA|NA	F	Golgi to endosome transport protein (Ent3)
cF03203	246410.XP_001247715.1	8.4e-08	63.5					fuNOG[21]	03W1W@ascNOG,0J84Z@euNOG,0M9HF@euroNOG,0PTII@fuNOG,0ZGVU@NOG,12IJ5@onyNOG,13ZMX@opiNOG	NA|NA|NA
cF03207	515849.XP_001904427.1	1.4e-16	92.4					fuNOG[21]	040CM@ascNOG,0JDS3@euNOG,0PY28@fuNOG,0YP2A@NOG,146ES@opiNOG,19W0C@sordNOG,1AEHE@sorNOG	NA|NA|NA	L	Heterokaryon incompatibility protein (HET)
cF03208	140110.NechaP82646	3.8e-16	91.3					fuNOG[21]	0IFQA@euNOG,0XPG4@NOG,13RMD@opiNOG	NA|NA|NA	E	Inherit from NOG: Catalyzes the reversible conversion of 3- phosphohydroxypyruvate to phosphoserine and of 3-hydroxy-2-oxo-4- phosphonooxybutanoate to phosphohydroxythreonine (By similarity)
cF03214	502779.XP_002797446.1	3.1e-52	212.6	FG11551.1				fuNOG[21]	03PRA@ascNOG,0IJ8P@euNOG,0M3VN@euroNOG,0PFFY@fuNOG,0ZHT6@NOG,12JX4@onyNOG,132DQ@opiNOG	NA|NA|NA	S	Fungal_trans
cF03220	502779.XP_002797446.1	1.8e-07	63.2	FG11551.1				fuNOG[21]	03PRA@ascNOG,0IJ8P@euNOG,0M3VN@euroNOG,0PFFY@fuNOG,0ZHT6@NOG,12JX4@onyNOG,132DQ@opiNOG	NA|NA|NA	S	Fungal_trans
cF03246	140110.NechaP52941	2.1e-110	404.1					fuNOG[21]	03K26@ascNOG,0IHK8@euNOG,0PH4N@fuNOG,0SF3J@hypNOG,0WV2B@necNOG,0Z4CH@NOG,13MF2@opiNOG,19MGY@sordNOG	NA|NA|NA
cF03272	5057.CADACLAP00003579	4.9e-28	130.6					fuNOG[21]	04DR6@ascNOG,0IR2D@euNOG,0MGVT@euroNOG,0QDUK@fuNOG,10T8W@NOG,13DSH@opiNOG	NA|NA|NA	S	LipA and NB-ARC
cF03280	29875.EHK18734	4.7e-12	78.2					fuNOG[21]	0YIPC@NOG,KOG2029@euNOG	NA|NA|NA	T	serine active site containing 1
cF03293	140110.NechaP66006	5e-13	81.6					fuNOG[21]	04BVG@ascNOG,0KN2B@euNOG,0Q8Y2@fuNOG,0SN3W@hypNOG,0WZVE@necNOG,10XWC@NOG,138GM@opiNOG,1A24G@sordNOG	NA|NA|NA
cF03374	51453.JGI104334	3.1e-75	288.1					fuNOG[21]	03W1M@ascNOG,0J6CB@euNOG,0PTR0@fuNOG,0SCP1@hypNOG,0YU5Y@NOG,13ZFM@opiNOG,19TV5@sordNOG	NA|NA|NA
cF03407	500485.XP_002566345.1	1.4e-26	125.9					fuNOG[21]	03NSU@ascNOG,0IECZ@euNOG,0M7NA@euroNOG,0MJGZ@eurotNOG,0PJRK@fuNOG,10MTT@NOG,13MYR@opiNOG	NA|NA|NA
cF03410	573729.XP_003666386.1	4.2e-20	104.4					fuNOG[21]	03P10@ascNOG,0IGGQ@euNOG,0PMQV@fuNOG,10MTT@NOG,13PEP@opiNOG,19N80@sordNOG,1ADHZ@sorNOG	NA|NA|NA
cF03411	162425.CADANIAP00005789	1.5e-17	95.9					fuNOG[21]	03NSU@ascNOG,0IECZ@euNOG,0M7NA@euroNOG,0MJGZ@eurotNOG,0PJRK@fuNOG,10MTT@NOG,13MYR@opiNOG	NA|NA|NA
cF03474	36630.CADNFIAP00002091	8e-173	612.1			K00013		fuNOG[21]	03PSQ@ascNOG,0MCNB@euroNOG,0MQSJ@eurotNOG,0PKZ3@fuNOG,13PAK@opiNOG,COG0141@NOG,KOG2697@euNOG	NA|NA|NA	E	Catalyzes the sequential NAD-dependent oxidations of L- histidinol to L-histidinaldehyde and then to L-histidine (By similarity)
cF03533	578458.XP_003028892.1	1.8e-12	79					fuNOG[21]	018ZB@agaNOG,01GWJ@agarNOG,096UB@basNOG,0J2Z4@euNOG,0PSPS@fuNOG,12254@NOG,13YAN@opiNOG	NA|NA|NA
cF03538	13684.SNOT_11381	2.4e-37	161.8	FG00698.1				fuNOG[21]	03NER@ascNOG,0H76Y@dotNOG,0IF86@euNOG,0PK96@fuNOG,11G2Q@NOG,12S5R@opiNOG,158KR@pleNOG	NA|NA|NA	S	Inherit from ascNOG: Conserved hypothetical protein
cF03556	861557.XP_003296110.1	3.3e-93	348.2	FG04683.1				fuNOG[21]	03JP5@ascNOG,0H4CH@dotNOG,0IGVT@euNOG,0PJHV@fuNOG,0YDYK@NOG,12RW5@opiNOG,15B7W@pleNOG	NA|NA|NA	S	Fungal specific transcription factor domain
cF03606	5722.A2EKI3	1.8e-21	109.8					fuNOG[21]	COG0666@NOG,KOG4177@euNOG	NA|NA|NA	M	Ankyrin Repeat Protein
cF03608	5059.CADAFLAP00003627	5.8e-65	253.1	FG05349.1				fuNOG[21]	03ZFA@ascNOG,0JD87@euNOG,0MACQ@euroNOG,0MT0Z@eurotNOG,0PXC4@fuNOG,0YK7S@NOG,1456J@opiNOG	NA|NA|NA	S	Inherit from ascNOG: Choline/ethanolamine kinase
cF03609	5022.CBX94308	5.4e-60	236.9					fuNOG[21]	03QT9@ascNOG,0H37F@dotNOG,0PFIB@fuNOG,13PNB@opiNOG,15E3D@pleNOG,COG1028@NOG,KOG0667@euNOG,KOG0725@euNOG	NA|NA|NA	Q	Inherit from dotNOG: KR domain
cF03612	578455.XP_003652913.1	1.3e-47	198					fuNOG[21]	03ZPG@ascNOG,0CXGN@chaNOG,0PXBM@fuNOG,1457R@opiNOG,19VHY@sordNOG,1AEDF@sorNOG,COG0666@NOG,KOG1477@euNOG,KOG4177@euNOG	NA|NA|NA	M	Ankyrin repeat
cF03614	441960.XP_002152025.1	1.2e-66	260.8					fuNOG[21]	044AA@ascNOG,0JN65@euNOG,0MBP5@euroNOG,0MR79@eurotNOG,0Q1W6@fuNOG,114R6@NOG,14HFM@opiNOG	NA|NA|NA	S	NACHT domain
cF03637	5057.CADACLAP00005328	1.3e-09	70.9	FG00678.1	GO:0000070,GO:0000228,GO:0000278,GO:0000280,GO:0000775,GO:0000779,GO:0000780,GO:0000793,GO:0000794,GO:0000819,GO:0005575,GO:0005622,GO:0005623,GO:0005634,GO:0005694,GO:0005737,GO:0005829,GO:0006996,GO:0007049,GO:0007059,GO:0007067,GO:0008104,GO:0008150,GO:0009987,GO:0016043,GO:0019222,GO:0022402,GO:0031056,GO:0031063,GO:0031066,GO:0031323,GO:0031399,GO:0031974,GO:0031981,GO:0032268,GO:0033036,GO:…			fuNOG[21]	03VAM@ascNOG,0J2E1@euNOG,0M8XX@euroNOG,0PSQT@fuNOG,0YPW7@NOG,13XMS@opiNOG	NA|NA|NA	S	Myb-like DNA-binding domain protein
cF03648	229533.XP_383655.1	1.8e-12	78.6					fuNOG[21]	0ZF1R@NOG	NA|NA|NA	S	BTB/POZ domain
cF03662	535722.XP_003173465.1	1.9e-37	162.9	AIM9	GO:0005575,GO:0005622,GO:0005623,GO:0005737,GO:0005739,GO:0043226,GO:0043227,GO:0043229,GO:0043231,GO:0044424,GO:0044444,GO:0044464			fuNOG[21]	02ZND@arthNOG,03NFC@ascNOG,0IGT7@euNOG,0M77J@euroNOG,0PIY2@fuNOG,0XR8W@NOG,12FIC@onyNOG,12SVW@opiNOG	NA|NA|NA	S	Inherit from onyNOG: Phosphotransferase enzyme family protein
cF03685	559305.XP_003232181.1	3.3e-09	67.8			K18696		fuNOG[21]	02UVR@arthNOG,03N52@ascNOG,0M2YM@euroNOG,0PM4D@fuNOG,12H4I@onyNOG,13KE1@opiNOG,COG0584@NOG,KOG0504@euNOG,KOG2421@euNOG	NA|NA|NA	C	Glycerophosphoryl diester phosphodiesterase family
cF03696	39416.CAZ85758	1.2e-254	885.9					fuNOG[21]	03J3P@ascNOG,0IIHZ@euNOG,0PK8I@fuNOG,100QS@NOG,135PI@opiNOG	NA|NA|NA	S	WSC domain
cF03708	559305.XP_003231594.1	7.4e-19	101.7					fuNOG[21]	02ZH7@arthNOG,03TWU@ascNOG,0J1CZ@euNOG,0M5Y9@euroNOG,0PQZW@fuNOG,0YYWF@NOG,12FDG@onyNOG,13UUV@opiNOG	NA|NA|NA	S	Inherit from euroNOG: conserved hypothetical protein
cF03738	7897.ENSLACP00000010288	7.1e-14	85.1					fuNOG[21]	0JP7K@euNOG,0WE45@meNOG,0ZN18@NOG,14DM9@opiNOG	NA|NA|NA
cF03778	452471.Aasi_0703	1.9e-25	123.2					fuNOG[21]	05JXB@bactNOG,COG0666@NOG	NA|NA|NA	K, T	ankyrin repeat-containing protein
cF03779	33178.CADATEAP00007088	5.1e-74	285.4					fuNOG[21]	0JDME@euNOG,0Y7M1@NOG	NA|NA|NA	S	Inherit from NOG: NACHT domain
cF03780	426418.XP_001932950.1	4.4e-88	332					fuNOG[21]	03PCY@ascNOG,0IHA8@euNOG,0PK9X@fuNOG,0YCPD@NOG,13PDI@opiNOG	NA|NA|NA
cF03783	5664.LmjF.34.0690	1.6e-08	67.8					fuNOG[21]	0IZ7T@euNOG,0T6BQ@kinNOG,11UGN@NOG	NA|NA|NA	S	conserved hypothetical protein
cF03807	5022.CBX97695	2e-24	119.4					fuNOG[21]	03N6W@ascNOG,0H6T6@dotNOG,0IGXD@euNOG,0PJWM@fuNOG,0XTU4@NOG,13M3B@opiNOG,15AQU@pleNOG	NA|NA|NA
cF03867	29850.GGTG_04232T0	3.9e-09	67.8	FG03807.1				fuNOG[21]	03THT@ascNOG,0J0EB@euNOG,0PQKY@fuNOG,12201@NOG,13VK9@opiNOG	NA|NA|NA	S	BTB/POZ domain
cF03869	164757.Mjls_2549	7.3e-161	573.2					fuNOG[21]	00WTJ@actNOG,08R62@bactNOG,11FI2@NOG	NA|NA|NA	S	Inherit from bactNOG: Protein of unknown function (DUF1679)
cF03872	140110.NechaP56055	4.3e-91	340.5	FG10085.1				fuNOG[21]	03XSY@ascNOG,0JAG2@euNOG,0PWEJ@fuNOG,0SMZV@hypNOG,0WZIG@necNOG,0YM81@NOG,141W9@opiNOG,19TZK@sordNOG	NA|NA|NA
cF03876	426418.XP_001932573.1	6.6e-41	173.7					fuNOG[21]	03KN3@ascNOG,0H6NH@dotNOG,0IF70@euNOG,0PHP8@fuNOG,0ZQS8@NOG,12U9G@opiNOG,158ZY@pleNOG	NA|NA|NA
cF03879	40559.EDN18292	5.3e-17	93.2					fuNOG[21]	03WCC@ascNOG,0J8BS@euNOG,0PTCP@fuNOG,1203S@NOG,1406T@opiNOG	NA|NA|NA	S	ribonuclease
cF03961	40559.EDN17719	1.1e-89	336.3					fuNOG[21]	03Q8K@ascNOG,0IVYR@euNOG,0PM8N@fuNOG,11YS5@NOG,13HWA@opiNOG	NA|NA|NA
cF03980	140110.NechaP95402	9e-10	69.7					fuNOG[21]	03WJB@ascNOG,0J8TQ@euNOG,0PUD7@fuNOG,0SFQX@hypNOG,0WSY7@necNOG,0YCNC@NOG,140MZ@opiNOG,19RD3@sordNOG	NA|NA|NA	S	Protein of unknown function (DUF3176)
cF04007	441960.XP_002144716.1	3.5e-72	276.9	FG08965.1		K07005		fuNOG[21]	03RJ0@ascNOG,0IWMA@euNOG,0M399@euroNOG,0MM0G@eurotNOG,0PNH4@fuNOG,13Q03@opiNOG,COG3467@NOG	NA|NA|NA	S	Inherit from euroNOG: conserved hypothetical protein
cF04060	51453.JGI65106	2.5e-113	414.1	FG00051.1				fuNOG[21]	03NI2@ascNOG,0PJIE@fuNOG,0SHA6@hypNOG,13KQ0@opiNOG,19IK7@sordNOG,COG0388@NOG,KOG0805@euNOG	NA|NA|NA	E	Carbon-nitrogen hydrolase
cF04061	1047171.EFQ30197	1.8e-148	531.9					fuNOG[21]	03UGF@ascNOG,0J1US@euNOG,0PRQI@fuNOG,11ZX1@NOG,13VVZ@opiNOG	NA|NA|NA
cF04062	140110.NechaP52893	2.4e-68	264.6					fuNOG[21]	03SMR@ascNOG,0IZ1G@euNOG,0PQ3H@fuNOG,0SN6P@hypNOG,0WTQ4@necNOG,0YBDH@NOG,13TZU@opiNOG,1A22S@sordNOG	NA|NA|NA	S	Aldoxime dehydratase
cF04076	29875.EHK25847	6.9e-08	63.5					fuNOG[21]	041F9@ascNOG,0JJMI@euNOG,0PZ4K@fuNOG,0SKPR@hypNOG,1171A@NOG,14B0K@opiNOG,19TRK@sordNOG	NA|NA|NA
cF04142	5141.EFNCRP00000001702	1.4e-30	140.2	SPT23	GO:0001666,GO:0005575,GO:0005622,GO:0005623,GO:0005634,GO:0005737,GO:0005783,GO:0005789,GO:0006342,GO:0006355,GO:0006357,GO:0006950,GO:0008150,GO:0009266,GO:0009409,GO:0009628,GO:0009889,GO:0009890,GO:0009891,GO:0009892,GO:0009893,GO:0009987,GO:0010035,GO:0010038,GO:0010468,GO:0010556,GO:0010557,GO:0010558,GO:0010565,GO:0010604,GO:0010605,GO:0010608,GO:0010628,GO:0010629,GO:0012505,GO:0016020,GO:…	K06867		fuNOG[21]	04DJP@ascNOG,0QDMP@fuNOG,10T3C@NOG,13CK3@opiNOG,19W2P@sordNOG,1AAUZ@sorNOG,KOG3836@euNOG	NA|NA|NA	K	IPT/TIG domain
cF04162	535722.XP_003169307.1	1.4e-11	75.5					fuNOG[21]	031TD@arthNOG,03ZPC@ascNOG,0JREN@euNOG,0MGMB@euroNOG,0PXBG@fuNOG,0ZMHH@NOG,12KMP@onyNOG,14FUJ@opiNOG	NA|NA|NA	S	BTB POZ domain-containing protein
cF04163	117187.FVEG_12944T0	1.2e-09	70.1	FG03807.1				fuNOG[21]	03THT@ascNOG,0J0EB@euNOG,0PQKY@fuNOG,12201@NOG,13VK9@opiNOG,19SPM@sordNOG	NA|NA|NA	S	BTB
cF04164	5057.CADACLAP00007281	5.4e-11	73.9					fuNOG[21]	03ZPC@ascNOG,0JREN@euNOG,0M8NU@euroNOG,0MTFK@eurotNOG,0PXBG@fuNOG,0ZMHH@NOG,14FUJ@opiNOG	NA|NA|NA	S	Inherit from euroNOG: BTB/POZ domain
cF04165	246410.XP_001240153.1	5.3e-12	77					fuNOG[21]	03QA0@ascNOG,0M2PT@euroNOG,0PIUK@fuNOG,13NAA@opiNOG,COG0699@NOG,KOG0446@euNOG	NA|NA|NA	U	Dynamin central region
cF04172	33178.CADATEAP00004468	1e-49	202.2			K07034		fuNOG[21]	03SEW@ascNOG,0IYEG@euNOG,0PNRA@fuNOG,13RRM@opiNOG,COG1584@NOG	NA|NA|NA	S	GPR1/FUN34/yaaH family
cF04196	33178.CADATEAP00010014	4e-42	179.5					fuNOG[21]	03UU4@ascNOG,0J2AK@euNOG,0M5UH@euroNOG,0MPDG@eurotNOG,0PS4H@fuNOG,0YBR9@NOG,13XYU@opiNOG	NA|NA|NA
cF04197	861557.XP_003301065.1	4e-34	152.1					fuNOG[21]	04CME@ascNOG,0HAE2@dotNOG,0KR5K@euNOG,0QCQR@fuNOG,1128U@NOG,13A49@opiNOG,15D0Q@pleNOG	NA|NA|NA
cF04212	13684.SNOT_01200	4.8e-24	118.2					fuNOG[21]	04CH6@ascNOG,0HAPG@dotNOG,0IM1F@euNOG,0QCUV@fuNOG,0ZJAG@NOG,139ZZ@opiNOG,159VN@pleNOG	NA|NA|NA
cF04244	5022.CBX99521	4e-88	331.6					fuNOG[21]	03PXI@ascNOG,0H5W9@dotNOG,0IJSK@euNOG,0PIS2@fuNOG,11K5R@NOG,12TMU@opiNOG,157TP@pleNOG	NA|NA|NA	S	FBOX
cF04264	214684.XP_568243.1	1.4e-93	349					fuNOG[21]	094VF@basNOG,0PKG4@fuNOG,13DRT@opiNOG,1CKEM@treNOG,COG0477@NOG,KOG2533@euNOG	NA|NA|NA	G	Major Facilitator Superfamily
cF04302	441959.XP_002486114.1	2.8e-14	85.1					fuNOG[21]	03ZV5@ascNOG,0JCRY@euNOG,0M9QU@euroNOG,0MPJD@eurotNOG,0PX66@fuNOG,0YK9G@NOG,145YV@opiNOG	NA|NA|NA	S	BTB/POZ domain
cF04303	441959.XP_002486114.1	6.6e-11	73.6					fuNOG[21]	03ZV5@ascNOG,0JCRY@euNOG,0M9QU@euroNOG,0MPJD@eurotNOG,0PX66@fuNOG,0YK9G@NOG,145YV@opiNOG	NA|NA|NA	S	BTB/POZ domain
cF04333	426418.XP_001935966.1	6e-74	284.6	FG08648.1	GO:0000003,GO:0003006,GO:0007049,GO:0008150,GO:0009653,GO:0009987,GO:0019953,GO:0022402,GO:0022413,GO:0022414,GO:0030154,GO:0030435,GO:0030437,GO:0032502,GO:0032505,GO:0034293,GO:0043934,GO:0043935,GO:0044699,GO:0044763,GO:0044767,GO:0048468,GO:0048610,GO:0048646,GO:0048856,GO:0048869	K00558		fuNOG[21]	03JTW@ascNOG,0H70V@dotNOG,0IKN7@euNOG,0PJNQ@fuNOG,12TWB@opiNOG,15D73@pleNOG,COG0270@NOG	NA|NA|NA	H	C-5 cytosine-specific DNA methylase
cF04336	140110.NechaP81997	2.1e-14	87					fuNOG[21]	03VYM@ascNOG,0JQS4@euNOG,0PTKS@fuNOG,0YV4Z@NOG,13ZUZ@opiNOG	NA|NA|NA
cF04337	117187.FVEG_11872T0	3e-25	121.7	FG10558.1				fuNOG[21]	03X6D@ascNOG,0JA9H@euNOG,0PWB0@fuNOG,0SHFQ@hypNOG,0YAZ9@NOG,141JC@opiNOG,1A3AI@sordNOG	NA|NA|NA	S	Heterokaryon incompatibility protein (HET)
cF04342	5141.EFNCRP00000005306	9.1e-33	146.4					fuNOG[21]	03XH3@ascNOG,0JAI5@euNOG,0PWGF@fuNOG,0YBD1@NOG,143DT@opiNOG,19W78@sordNOG,1A9X0@sorNOG	NA|NA|NA
cF04358	5022.CBY00968	1e-210	738.4	FG05589.1				fuNOG[21]	03PA3@ascNOG,0H6P1@dotNOG,0PFGP@fuNOG,12NWX@opiNOG,1594C@pleNOG,COG1131@NOG,KOG0061@euNOG	NA|NA|NA	Q	ABC-2 type transporter
cF04368	13684.SNOT_13255	5e-20	103.6	FG09477.1				fuNOG[21]	03NIU@ascNOG,0H6CQ@dotNOG,0IIGN@euNOG,0PHCF@fuNOG,1353U@opiNOG,15A2N@pleNOG,COG3576@NOG	NA|NA|NA	S	Pyridoxamine 5'-phosphate oxidase
cF04380	40559.EDN29738	5.1e-18	97.1					fuNOG[21]	03WBI@ascNOG,0J6ZF@euNOG,0PTZI@fuNOG,0Z6BP@NOG,13Z8X@opiNOG	NA|NA|NA
cF04386	29850.GGTG_12321T0	1.3e-07	61.2					fuNOG[21]	03V10@ascNOG,0J2CZ@euNOG,0PRVU@fuNOG,0UF3W@magNOG,124YW@NOG,13WWH@opiNOG,19TKE@sordNOG	NA|NA|NA
cF04387	861557.XP_003304694.1	9.5e-10	70.1					fuNOG[21]	03V10@ascNOG,0H8XD@dotNOG,0J2CZ@euNOG,0PRVU@fuNOG,124YW@NOG,13WWH@opiNOG,15CID@pleNOG	NA|NA|NA
cF04407	51453.JGI104334	2e-83	315.1					fuNOG[21]	03W1M@ascNOG,0J6CB@euNOG,0PTR0@fuNOG,0SCP1@hypNOG,0YU5Y@NOG,13ZFM@opiNOG,19TV5@sordNOG	NA|NA|NA
cF04420	5722.A2EN31	3.9e-13	82.8					fuNOG[21]	0J54P@euNOG,0ZI1N@NOG	NA|NA|NA
cF04423	861557.XP_003297297.1	7.4e-19	101.3		GO:0005575,GO:0005622,GO:0005623,GO:0005634,GO:0043226,GO:0043227,GO:0043229,GO:0043231,GO:0044424,GO:0044464			fuNOG[21]	04240@ascNOG,0H9ZD@dotNOG,0PZQQ@fuNOG,11RPS@NOG,14EV5@opiNOG,158AD@pleNOG,KOG2043@euNOG	NA|NA|NA	L	Inherit from KOG: PAX interacting (with transcription-activation domain) protein 1
cF04439	5061.CADANGAP00004352	6.4e-15	87.4					fuNOG[21]	03PB6@ascNOG,0IJ5R@euNOG,0MDIA@euroNOG,0MT3W@eurotNOG,0PKZZ@fuNOG,0Y7GR@NOG,13NDX@opiNOG	NA|NA|NA
cF04440	5061.CADANGAP00004352	9e-14	83.2					fuNOG[21]	03PB6@ascNOG,0IJ5R@euNOG,0MDIA@euroNOG,0MT3W@eurotNOG,0PKZZ@fuNOG,0Y7GR@NOG,13NDX@opiNOG	NA|NA|NA
cF04508	51453.JGI32027	7e-55	219.5					fuNOG[21]	03WJS@ascNOG,0JAEK@euNOG,0PW5F@fuNOG,0SM7M@hypNOG,117AR@NOG,142Z7@opiNOG,19KCT@sordNOG	NA|NA|NA	S	Phospholipase/Carboxylesterase
cF04563	578458.XP_003026237.1	3.9e-27	127.1			K03469		fuNOG[21]	01APZ@agaNOG,01GBZ@agarNOG,0976S@basNOG,0PY79@fuNOG,1483G@opiNOG,COG0328@NOG,KOG3752@euNOG	NA|NA|NA	L	Pfam:RnaseH
cF04564	578458.XP_003026237.1	1.6e-07	62.4			K03469		fuNOG[21]	01APZ@agaNOG,01GBZ@agarNOG,0976S@basNOG,0PY79@fuNOG,1483G@opiNOG,COG0328@NOG,KOG3752@euNOG	NA|NA|NA	L	Pfam:RnaseH
cF04609	1047171.EFQ27096	1.9e-11	74.3	FG04674.1				fuNOG[21]	03VA4@ascNOG,0J4NF@euNOG,0PSQ0@fuNOG,1290Q@NOG,13XY0@opiNOG	NA|NA|NA
cF04634	441960.XP_002145719.1	1.4e-62	245.7					fuNOG[21]	0IEWT@euNOG,11H9W@NOG	NA|NA|NA	S	O-Methyltransferase
cF04644	535722.XP_003169307.1	2e-12	79					fuNOG[21]	031TD@arthNOG,03ZPC@ascNOG,0JREN@euNOG,0MGMB@euroNOG,0PXBG@fuNOG,0ZMHH@NOG,12KMP@onyNOG,14FUJ@opiNOG	NA|NA|NA	S	BTB POZ domain-containing protein
cF04645	40559.EDN18737	7.6e-14	83.2					fuNOG[21]	03V09@ascNOG,0J4XQ@euNOG,0PT2C@fuNOG,0ZNG0@NOG,13X55@opiNOG	NA|NA|NA	S	BTB POZ domain protein
cF04646	222929.XP_003069108.1	1.3e-20	105.5					fuNOG[21]	03ZPC@ascNOG,0JREN@euNOG,0M8NU@euroNOG,0PXBG@fuNOG,0ZMHH@NOG,12IN7@onyNOG,14FUJ@opiNOG	NA|NA|NA	S	BTB/POZ domain
cF04647	246410.XP_001240153.1	9e-09	66.6					fuNOG[21]	03QA0@ascNOG,0M2PT@euroNOG,0PIUK@fuNOG,13NAA@opiNOG,COG0699@NOG,KOG0446@euNOG	NA|NA|NA	U	Dynamin central region
cF04648	5057.CADACLAP00007281	1e-14	86.3					fuNOG[21]	03ZPC@ascNOG,0JREN@euNOG,0M8NU@euroNOG,0MTFK@eurotNOG,0PXBG@fuNOG,0ZMHH@NOG,14FUJ@opiNOG	NA|NA|NA	S	Inherit from euroNOG: BTB/POZ domain
cF04649	336963.XP_002583556.1	2.5e-09	68.2					fuNOG[21]	03ZPC@ascNOG,0JREN@euNOG,0M8NU@euroNOG,0PXBG@fuNOG,0ZMHH@NOG,12IN7@onyNOG,14FUJ@opiNOG	NA|NA|NA	S	BTB/POZ domain
cF04656	246410.XP_001240153.1	5.7e-09	67					fuNOG[21]	03QA0@ascNOG,0M2PT@euroNOG,0PIUK@fuNOG,13NAA@opiNOG,COG0699@NOG,KOG0446@euNOG	NA|NA|NA	U	Dynamin central region
cF04687	29850.GGTG_09560T0	5.9e-53	215.3					fuNOG[21]	048XB@ascNOG,0Q712@fuNOG,0U8HN@magNOG,13HGR@opiNOG,19XTX@sordNOG,COG0666@NOG,KOG0504@euNOG,KOG2029@euNOG	NA|NA|NA	S	NACHT domain
cF04689	306901.XP_001226797.1	1.8e-11	74.7					fuNOG[21]	03XAE@ascNOG,0CXFD@chaNOG,0IVYI@euNOG,0PUJT@fuNOG,0Y6I4@NOG,140IS@opiNOG,19U5Q@sordNOG,1AFN4@sorNOG	NA|NA|NA	S	Inherit from euNOG: Conserved hypothetical protein
cF04725	117187.FVEG_09969T0	3.1e-58	231.5					fuNOG[21]	04A6B@ascNOG,0QAJ3@fuNOG,0SEMQ@hypNOG,136VH@opiNOG,1A5JA@sordNOG,COG2124@NOG,KOG0156@euNOG	NA|NA|NA	Q	Cytochrome P450
cF04804	222929.XP_003065875.1	3.3e-45	187.2		GO:0007275,GO:0008150,GO:0032501,GO:0032502,GO:0043581,GO:0044699,GO:0044707,GO:0044767,GO:0048856			fuNOG[21]	03TB8@ascNOG,0IYXM@euNOG,0M822@euroNOG,0PQI0@fuNOG,11VIJ@NOG,12HF0@onyNOG,13TDW@opiNOG	NA|NA|NA	S	conserved hypothetical protein
cF04818	229533.XP_391396.1	1.7e-37	162.2					fuNOG[21]	03YG0@ascNOG,0JB90@euNOG,0PV4G@fuNOG,0SHS8@hypNOG,0WV31@necNOG,0YC4G@NOG,140UI@opiNOG,1A2JG@sordNOG	NA|NA|NA	K	Fungal specific transcription factor domain
cF04825	140110.NechaP80657	2.1e-08	66.6			K17652		fuNOG[21]	03SMQ@ascNOG,0IYPF@euNOG,0PPP2@fuNOG,0YJW7@NOG,13TMB@opiNOG,19SDI@sordNOG	NA|NA|NA	Q	short chain dehydrogenase
cF04828	573729.XP_003662375.1	1.1e-42	179.1	FG00028.1	GO:0003674,GO:0003824,GO:0005575,GO:0005576,GO:0008150,GO:0008152,GO:0008233,GO:0008237,GO:0016787,GO:0044046,GO:0044403,GO:0044419,GO:0051701,GO:0051704,GO:0052047,GO:0052048,GO:0052051,GO:0052211,GO:0070011	K07762		fuNOG[21]	03M8D@ascNOG,0CWF7@chaNOG,0IFMM@euNOG,0PIAE@fuNOG,0XPH7@NOG,1300I@opiNOG,19PI8@sordNOG,1AAPE@sorNOG	NA|NA|NA	O	Pregnancy-associated plasma protein-A
cF04854	644223.XP_002494270.1	9.3e-07	61.2	FG06722.1	GO:0005575,GO:0005622,GO:0005623,GO:0005634,GO:0005730,GO:0005737,GO:0005739,GO:0031974,GO:0031981,GO:0043226,GO:0043227,GO:0043228,GO:0043229,GO:0043231,GO:0043232,GO:0043233,GO:0044422,GO:0044424,GO:0044428,GO:0044444,GO:0044446,GO:0044464,GO:0070013			fuNOG[21]	03PQY@ascNOG,0IJQH@euNOG,0PKPC@fuNOG,123BC@NOG,13JEJ@opiNOG,198NB@saccNOG,19F4T@sacNOG	NA|NA|NA	S	nucleic acid binding
cF04865	5022.CBX99994	1.8e-08	64.7	KAPC	GO:0005575,GO:0005622,GO:0005623,GO:0005634,GO:0043226,GO:0043227,GO:0043229,GO:0043231,GO:0044424,GO:0044464			fuNOG[21]	03UVJ@ascNOG,0H8UR@dotNOG,0J2WB@euNOG,0PRVF@fuNOG,1262C@NOG,13W6Z@opiNOG,15BKU@pleNOG	NA|NA|NA	K	bZIP transcription factor
cF04866	861557.XP_003305435.1	1.6e-25	122.5					fuNOG[21]	03ZFM@ascNOG,0H9ZZ@dotNOG,0IVYI@euNOG,0Q0BH@fuNOG,0Y6I4@NOG,14D4D@opiNOG,15F2K@pleNOG	NA|NA|NA	S	Inherit from euNOG: Conserved hypothetical protein
cF04887	486041.XP_001884154.1	1.7e-17	96.7					fuNOG[21]	01A9J@agaNOG,01GSE@agarNOG,096XC@basNOG,0JJF4@euNOG,0PZPQ@fuNOG,0Z9H7@NOG,14C70@opiNOG	NA|NA|NA
cF04904	1007104.SUS17_2204	3.6e-82	310.1					fuNOG[21]	08NP8@bactNOG,COG0561@NOG	NA|NA|NA	S	had-superfamily hydrolase, subfamily iib
cF04919	29875.EHK15286	1.6e-18	99					fuNOG[21]	03SFC@ascNOG,0IXFU@euNOG,0PPHW@fuNOG,0SM5C@hypNOG,11PQJ@NOG,13SAP@opiNOG,19SH3@sordNOG	NA|NA|NA
cF04952	5180.EDN93353	5.6e-161	572.4					fuNOG[21]	03WFD@ascNOG,0JAZA@euNOG,0PU9C@fuNOG,1411P@opiNOG,COG3386@NOG	NA|NA|NA	G	Inherit from COG: SMP-30 gluconolaconase LRE domain protein
cF04980	5085.CADAFUBP00007815	6.4e-54	218.4					fuNOG[21]	044XT@ascNOG,0KIMK@euNOG,0MEYQ@euroNOG,0Q4IV@fuNOG,13208@opiNOG,COG0666@NOG	NA|NA|NA	M	Ankyrin repeat
cF04987	29875.EHK18447	2e-06	60.1	FG10428.1				fuNOG[21]	03QDI@ascNOG,0IKZK@euNOG,0PMCH@fuNOG,0SJEQ@hypNOG,1006K@NOG,13NIP@opiNOG,19NWV@sordNOG	NA|NA|NA	S	NACHT domain
cF04995	339724.XP_001542790.1	6.5e-33	147.1	FG10490.1	GO:0006807,GO:0008150,GO:0008152,GO:0009058,GO:0009987,GO:0034641,GO:0044237,GO:0044249,GO:0044271			fuNOG[21]	03QZ2@ascNOG,0IWPV@euNOG,0M8B0@euroNOG,0PMYD@fuNOG,11HQG@NOG,12IC9@onyNOG,13QR7@opiNOG	NA|NA|NA
cF04996	36630.CADNFIAP00004756	1.1e-149	536.6					fuNOG[21]	03M2E@ascNOG,0M6PE@euroNOG,0MH31@eurotNOG,0PKAU@fuNOG,12VZX@opiNOG,COG0666@NOG,COG0775@NOG,KOG4177@euNOG	NA|NA|NA	M	Ankyrin repeat
cF04997	36630.CADNFIAP00002467	5.2e-79	301.2	FG04177.1	GO:0007275,GO:0008150,GO:0032501,GO:0032502,GO:0043581,GO:0044699,GO:0044707,GO:0044767,GO:0048856			fuNOG[21]	03J53@ascNOG,0IEA6@euNOG,0M33F@euroNOG,0MHIR@eurotNOG,0PG6Z@fuNOG,12QXS@opiNOG,COG0464@NOG	NA|NA|NA	O	AAA family ATPase
cF04998	140110.NechaP87861	3.1e-58	233.8					fuNOG[21]	042BI@ascNOG,0IEBB@euNOG,0Q0BG@fuNOG,0YFXX@NOG,14D2S@opiNOG,19U00@sordNOG	NA|NA|NA	S	Heterokaryon incompatibility protein (HET)
cF05019	5059.CADAFLAP00006652	9.3e-27	127.1					fuNOG[21]	03Z1U@ascNOG,0JBN1@euNOG,0PWQ6@fuNOG,0YGQD@NOG,144ZG@opiNOG	NA|NA|NA	S	Protein of unknown function (DUF3176)
cF05023	140110.NechaP95927	9.1e-39	167.9					fuNOG[21]	049YM@ascNOG,0KPGX@euNOG,0QASJ@fuNOG,0SGW3@hypNOG,0WUJ2@necNOG,10WI0@NOG,136MY@opiNOG,1A5ZV@sordNOG	NA|NA|NA	S	Heterokaryon incompatibility protein
cF05030	7227.FBpp0084219	4.2e-15	88.2					fuNOG[21]	03EZB@artNOG,0AXYX@biNOG,0H117@dipNOG,0I1JS@droNOG,0KBET@euNOG,0T1WH@inNOG,0WA66@meNOG,10NBN@NOG,14RG7@opiNOG	NA|NA|NA	S	ChtBD2
cF05033	39416.CAZ83068	1.9e-92	345.9					fuNOG[21]	03QEJ@ascNOG,0IK18@euNOG,0PMDQ@fuNOG,13JE7@opiNOG,COG0464@NOG	NA|NA|NA	O	ATPase family associated with various cellular activities (AAA)
cF05034	5022.CBX93863	3.3e-39	168.7					fuNOG[21]	03N45@ascNOG,0H8QX@dotNOG,0IKY3@euNOG,0PJ5S@fuNOG,11G9M@NOG,13NV2@opiNOG,15CEG@pleNOG	NA|NA|NA
cF05035	5507.FOXG_13489P0	8.6e-111	406	FG11350.1	GO:0007275,GO:0008150,GO:0032501,GO:0032502,GO:0043581,GO:0044699,GO:0044707,GO:0044767,GO:0048856			fuNOG[21]	03NR7@ascNOG,0IVGU@euNOG,0PMGB@fuNOG,0SIW9@hypNOG,0XQXY@NOG,12SIS@opiNOG,19NMX@sordNOG	NA|NA|NA	S	Inherit from NOG: exported protein
cF05037	5022.CBX99278	1.8e-160	571.6	FG06195.1	GO:0000003,GO:0005575,GO:0005622,GO:0005623,GO:0005634,GO:0005737,GO:0005829,GO:0006950,GO:0007049,GO:0007059,GO:0007126,GO:0008150,GO:0009987,GO:0022402,GO:0033554,GO:0043226,GO:0043227,GO:0043229,GO:0043231,GO:0044424,GO:0044444,GO:0044464,GO:0044699,GO:0044763,GO:0045132,GO:0048610,GO:0050896,GO:0051321,GO:0051716			fuNOG[21]	03NRR@ascNOG,0H6EM@dotNOG,0PJWN@fuNOG,115V6@NOG,13KJW@opiNOG,15DF4@pleNOG,KOG2306@euNOG	NA|NA|NA	S	Inherit from ascNOG: Conserved hypothetical protein
cF05040	29875.EHK22998	2.7e-56	224.6	FG07805.1				fuNOG[21]	040XR@ascNOG,0J851@euNOG,0PTXP@fuNOG,0SIIR@hypNOG,12BHH@NOG,13Z89@opiNOG,1A41C@sordNOG	NA|NA|NA	S	SAM dependent carboxyl methyltransferase
cF05042	5061.CADANGAP00009795	3.2e-39	168.7					fuNOG[21]	04E7T@ascNOG,0IUF3@euNOG,0MH0D@euroNOG,0QEDK@fuNOG,11HF5@NOG,13GQR@opiNOG	NA|NA|NA	S	Heterokaryon incompatibility protein (HET)
cF05098	1047171.EFQ33765	1.9e-146	523.9	FG03160.1		K01714		fuNOG[21]	03P2D@ascNOG,0H394@dotNOG,0IJ6V@euNOG,0PK06@fuNOG,0XY99@NOG,13NJH@opiNOG	NA|NA|NA	E	DHDPS
cF05099	148305.A4QPU3	2.4e-174	617.1	FG03161.1				fuNOG[21]	03KAA@ascNOG,0PHCB@fuNOG,0UCHN@magNOG,1334K@opiNOG,19JH5@sordNOG,COG0477@NOG,KOG2533@euNOG	NA|NA|NA	G	MFS transporter
cF05100	1047171.EFQ33768	2.5e-137	494.6	FG03159.1				fuNOG[21]	03NE8@ascNOG,0IVNW@euNOG,0PJF3@fuNOG,0ZA6P@NOG,13N1A@opiNOG	NA|NA|NA	S	Transcription factor
cF05116	5022.CBX95596	2.9e-32	144.8					fuNOG[21]	03TC0@ascNOG,0HB91@dotNOG,0IZB2@euNOG,0PQEF@fuNOG,0YGBF@NOG,13TGJ@opiNOG,15CQN@pleNOG	NA|NA|NA	T	STYKc
cF05160	419610.Mext_3146	8.6e-30	135.6					fuNOG[21]	01RAD@aproNOG,07RFM@bactNOG,0XPQW@NOG,16SAD@proNOG	NA|NA|NA	C	alcohol dehydrogenase
cF05163	40559.EDN32796	3.2e-53	214.2					fuNOG[21]	03U8S@ascNOG,0J13E@euNOG,0PREZ@fuNOG,11IS0@NOG,13US2@opiNOG	NA|NA|NA
cF05222	51453.JGI108686	8.5e-44	183.7					fuNOG[21]	03R58@ascNOG,0IWAZ@euNOG,0PNMV@fuNOG,0SGQ7@hypNOG,0Y9NG@NOG,13QN3@opiNOG,19RWV@sordNOG	NA|NA|NA	S	Eukaryotic aspartyl protease
cF05225	36630.CADNFIAP00010347	1.4e-105	389.4					fuNOG[21]	03QK5@ascNOG,0MDK6@euroNOG,0MRYE@eurotNOG,0PMJR@fuNOG,0YA63@NOG,13PJW@opiNOG,KOG0615@euNOG	NA|NA|NA	D	S_TKc
cF05266	229533.XP_383655.1	2.1e-18	98.6					fuNOG[21]	0ZF1R@NOG	NA|NA|NA	S	BTB/POZ domain
cF05267	336963.XP_002583556.1	1.1e-14	86.3					fuNOG[21]	03ZPC@ascNOG,0JREN@euNOG,0M8NU@euroNOG,0PXBG@fuNOG,0ZMHH@NOG,12IN7@onyNOG,14FUJ@opiNOG	NA|NA|NA	S	BTB/POZ domain
cF05268	5507.FOXG_16558P0	6e-18	97.1					fuNOG[21]	03V09@ascNOG,0J4XQ@euNOG,0PT2C@fuNOG,0SIPJ@hypNOG,0ZNG0@NOG,13X55@opiNOG,1A3I0@sordNOG	NA|NA|NA	S	BTB
cF05269	500485.XP_002561524.1	3.8e-15	87.8					fuNOG[21]	03THT@ascNOG,0J0EB@euNOG,0M8WI@euroNOG,0MSZ3@eurotNOG,0PQKY@fuNOG,12201@NOG,13VK9@opiNOG	NA|NA|NA	S	BTB/POZ domain
cF05270	573729.XP_003660908.1	3.2e-17	94.7					fuNOG[21]	03MZ3@ascNOG,0CWVP@chaNOG,0IKWJ@euNOG,0PJ0J@fuNOG,0YCUG@NOG,13PI6@opiNOG,19UHP@sordNOG,1AF2H@sorNOG	NA|NA|NA	S	BTB
cF05275	5507.FOXG_16558P0	3e-16	91.3					fuNOG[21]	03V09@ascNOG,0J4XQ@euNOG,0PT2C@fuNOG,0SIPJ@hypNOG,0ZNG0@NOG,13X55@opiNOG,1A3I0@sordNOG	NA|NA|NA	S	BTB
cF05281	306901.XP_001222442.1	1e-18	99.4					fuNOG[21]	03MZ3@ascNOG,0CWVP@chaNOG,0IKWJ@euNOG,0PJ0J@fuNOG,0YCUG@NOG,13PI6@opiNOG,19UHP@sordNOG,1AF2H@sorNOG	NA|NA|NA	S	BTB
cF05283	441959.XP_002483097.1	2.7e-62	245					fuNOG[21]	03XFK@ascNOG,0JAR0@euNOG,0MCTM@euroNOG,0MSM5@eurotNOG,0PV6S@fuNOG,0YF7X@NOG,141ZR@opiNOG	NA|NA|NA	S	Transferase family
cF05288	336963.XP_002583556.1	1.4e-17	95.5					fuNOG[21]	03ZPC@ascNOG,0JREN@euNOG,0M8NU@euroNOG,0PXBG@fuNOG,0ZMHH@NOG,12IN7@onyNOG,14FUJ@opiNOG	NA|NA|NA	S	BTB/POZ domain
cF05289	336963.XP_002583556.1	1.3e-14	85.9					fuNOG[21]	03ZPC@ascNOG,0JREN@euNOG,0M8NU@euroNOG,0PXBG@fuNOG,0ZMHH@NOG,12IN7@onyNOG,14FUJ@opiNOG	NA|NA|NA	S	BTB/POZ domain
cF05290	29850.GGTG_05423T0	8.5e-22	109.8	FG03807.1				fuNOG[21]	03THT@ascNOG,0J0EB@euNOG,0PQKY@fuNOG,0UE1D@magNOG,12201@NOG,13VK9@opiNOG,19U0J@sordNOG	NA|NA|NA	S	BTB
cF05317	5022.CBX96122	6.3e-27	126.7	FG08763.1	GO:0000003,GO:0000183,GO:0000228,GO:0000775,GO:0000781,GO:0000784,GO:0000785,GO:0000790,GO:0000792,GO:0000922,GO:0000975,GO:0001067,GO:0003006,GO:0003674,GO:0003676,GO:0003677,GO:0003682,GO:0005488,GO:0005515,GO:0005575,GO:0005622,GO:0005623,GO:0005634,GO:0005694,GO:0005720,GO:0005721,GO:0005724,GO:0005815,GO:0005816,GO:0005819,GO:0005856,GO:0006139,GO:0006259,GO:0006325,GO:0006338,GO:0006342,GO:…	K11585		fuNOG[21]	03U2M@ascNOG,0H89M@dotNOG,0J3YA@euNOG,0PQJY@fuNOG,11VMV@NOG,13VD3@opiNOG,15BR3@pleNOG	NA|NA|NA	B	Chromo shadow domain
cF05387	554155.XP_002850937.1	2.5e-24	119.4	FGSG_10173				fuNOG[21]	03VMG@ascNOG,0IZRH@euNOG,0M8N9@euroNOG,0PTIC@fuNOG,0Z9RT@NOG,12I9X@onyNOG,13YWP@opiNOG	NA|NA|NA	S	Inherit from euroNOG: C-x8-C-x5-C-x3-H type zinc finger protein
cF05421	7739.JGI112388	2.1e-08	65.9					fuNOG[21]	09UAC@biNOG,0V8U5@meNOG,0XRYM@NOG,12T0M@opiNOG,KOG3592@euNOG	NA|NA|NA	Z	Microtubule-associated protein
cF05422	7739.JGI112388	8.8e-09	66.6					fuNOG[21]	09UAC@biNOG,0V8U5@meNOG,0XRYM@NOG,12T0M@opiNOG,KOG3592@euNOG	NA|NA|NA	Z	Microtubule-associated protein
cF05478	5022.CBX93643	3.4e-06	60.1					fuNOG[21]	03S8S@ascNOG,0H89Y@dotNOG,0IXRE@euNOG,0PP9M@fuNOG,1243I@NOG,13RGK@opiNOG,15DPT@pleNOG	NA|NA|NA
cF05499	140110.NechaP86704	5.5e-69	267.7					fuNOG[21]	049VM@ascNOG,0KPJB@euNOG,0QAVG@fuNOG,0SJXU@hypNOG,10WFQ@NOG,136IX@opiNOG,1A65F@sordNOG	NA|NA|NA	S	Heterokaryon incompatibility protein (HET)
cF05505	5507.FOXG_13725P0	2.9e-82	311.2					fuNOG[21]	042K1@ascNOG,0Q0P3@fuNOG,0SISK@hypNOG,1491Y@opiNOG,1A3S4@sordNOG,COG0666@NOG,KOG4177@euNOG	NA|NA|NA	M	NACHT domain
cF05506	29850.GGTG_06474T0	1.4e-16	93.2					fuNOG[21]	03QC0@ascNOG,0PJ1C@fuNOG,0U83M@magNOG,13NT4@opiNOG,19MGP@sordNOG,COG0666@NOG,KOG4177@euNOG	NA|NA|NA	M	ANK
cF05524	441960.XP_002153743.1	1.8e-281	974.2			K11593		fuNOG[21]	03NBJ@ascNOG,0PISF@fuNOG,0XP07@NOG,12N2H@opiNOG,KOG1041@euNOG	NA|NA|NA	J	RNA interference and gene silencing protein
cF05539	306901.XP_001220373.1	2.7e-83	314.3	FG03801.1		K00505		fuNOG[21]	03R5S@ascNOG,0IWAG@euNOG,0PN51@fuNOG,11GD1@NOG,13QKY@opiNOG,19W3P@sordNOG,1A8RA@sorNOG	NA|NA|NA	G	Common central domain of tyrosinase
cF05573	13684.SNOT_10190	3.5e-27	128.6					fuNOG[21]	03PZZ@ascNOG,0H8DG@dotNOG,0IKW2@euNOG,0PIQR@fuNOG,0Y63N@NOG,13NZN@opiNOG,15EKM@pleNOG	NA|NA|NA	S	CorA-like Mg2+ transporter protein
cF05591	861557.XP_003296426.1	4.2e-25	121.3					fuNOG[21]	03UY3@ascNOG,0H8UF@dotNOG,0J2UA@euNOG,0PSBI@fuNOG,12APJ@NOG,13Y9F@opiNOG,15AYD@pleNOG	NA|NA|NA
cF05668	5180.EDO01326	2.2e-38	164.9					fuNOG[21]	03Z2A@ascNOG,0IZ2P@euNOG,0PQ71@fuNOG,11NRX@NOG,13SW3@opiNOG	NA|NA|NA	S	Protein of unknown function (DUF3176)
cF05692	5507.FOXG_12208P0	2e-17	95.5					fuNOG[21]	03QRF@ascNOG,0INM6@euNOG,0PHKC@fuNOG,0SE4P@hypNOG,107DY@NOG,13M84@opiNOG,19NSQ@sordNOG	NA|NA|NA	S	Inherit from ascNOG: Conserved hypothetical protein
cF05694	318829.MGG_15185T0	1.8e-41	175.6	FG04654.1				fuNOG[21]	03ZGY@ascNOG,0JCKH@euNOG,0PXHG@fuNOG,0U99F@magNOG,0YJF2@NOG,14577@opiNOG,19YR2@sordNOG	NA|NA|NA	S	Chitin recognition protein
cF05704	5507.FOXG_08180P0	2.9e-33	148.3	FG06424.1				fuNOG[21]	042CP@ascNOG,0J0C1@euNOG,0Q0SF@fuNOG,0SIJZ@hypNOG,11U5P@NOG,13VX9@opiNOG,19SJF@sordNOG	NA|NA|NA	S	SRP40, C-terminal domain
cF05721	29875.EHK22920	8.9e-65	252.7					fuNOG[21]	03KGE@ascNOG,0PHHZ@fuNOG,0SJMT@hypNOG,13IG8@opiNOG,1A38W@sordNOG,COG0604@NOG,KOG1198@euNOG	NA|NA|NA	Q	Alcohol dehydrogenase GroES-like domain
cF05736	33178.CADATEAP00002422	5.5e-53	213.8					fuNOG[21]	03VH8@ascNOG,0J3Q9@euNOG,0M8X9@euroNOG,0PRUM@fuNOG,127QU@NOG,13XB1@opiNOG	NA|NA|NA
cF05784	12957.ACEP_00014539-PA	2.1e-45	189.1					fuNOG[21]	0341H@artNOG,09VJI@biNOG,0S663@hymNOG,0SQQJ@inNOG,0V6IP@meNOG,0XQ50@NOG,12QC0@opiNOG,KOG0663@euNOG	NA|NA|NA	T	S_TKc
cF05785	1047171.EFQ28329	1.2e-78	298.9					fuNOG[21]	03Q5H@ascNOG,0H7XA@dotNOG,0IKRG@euNOG,0PI3H@fuNOG,11MQ9@NOG,12UCJ@opiNOG	NA|NA|NA
cF05786	7222.FBpp0157851	7.1e-81	308.1					fuNOG[21]	03E6Q@artNOG,09UB7@biNOG,0H00W@dipNOG,0HXIN@droNOG,0T2PV@inNOG,0V5AC@meNOG,12RRB@opiNOG,COG0666@NOG,KOG4177@euNOG	NA|NA|NA	M	ZU5
cF05828	140110.NechaP83581	4.6e-142	510.8	FG04965.1				fuNOG[21]	03RK6@ascNOG,0IW0S@euNOG,0PNFU@fuNOG,0SIH3@hypNOG,0WVWD@necNOG,119TS@NOG,13QTP@opiNOG,19QGC@sordNOG	NA|NA|NA	S	Heterokaryon incompatibility protein (HET)
cF05833	5085.CADAFUBP00007814	4e-47	195.7					fuNOG[21]	03P88@ascNOG,0M54Z@euroNOG,0MPY9@eurotNOG,0PK0T@fuNOG,13P7R@opiNOG,COG0666@NOG,KOG0504@euNOG	NA|NA|NA	M	NACHT domain
cF05835	5022.CBX98752	1.2e-17	97.4	FG10047.1	GO:0000003,GO:0000909,GO:0003006,GO:0007049,GO:0007275,GO:0008150,GO:0009653,GO:0009987,GO:0019953,GO:0019954,GO:0022402,GO:0022414,GO:0030154,GO:0030435,GO:0030436,GO:0030582,GO:0030584,GO:0032501,GO:0032502,GO:0034293,GO:0043934,GO:0043935,GO:0043936,GO:0044699,GO:0044707,GO:0044763,GO:0044767,GO:0048513,GO:0048608,GO:0048610,GO:0048646,GO:0048731,GO:0048856,GO:0048869,GO:0061458,GO:0070791,GO:…			fuNOG[21]	03R8W@ascNOG,0H8CJ@dotNOG,0IJBX@euNOG,0PP0Y@fuNOG,11HYC@NOG,13QEK@opiNOG,15BC8@pleNOG	NA|NA|NA	S	Inherit from ascNOG: F-box domain protein
cF05837	29875.EHK16833	2.7e-53	216.1					fuNOG[21]	049CA@ascNOG,0KMV6@euNOG,0Q8N3@fuNOG,0SMY2@hypNOG,13635@opiNOG,1A1PA@sordNOG,COG0666@NOG,COG0775@NOG,KOG0504@euNOG	NA|NA|NA	F	NACHT domain
cF05839	140110.NechaP48126	1.6e-42	180.3					fuNOG[21]	COG0666@NOG,KOG4177@euNOG	NA|NA|NA	M	Ankyrin Repeat Protein
cF05840	40559.EDN21264	2e-26	126.7					fuNOG[21]	03P88@ascNOG,0PK0T@fuNOG,13P7R@opiNOG,COG0666@NOG,KOG0504@euNOG	NA|NA|NA	M	Ankyrin repeat
cF05847	4896.SPCC1739.05.1	3.5e-20	105.9		GO:0000228,GO:0000785,GO:0000790,GO:0005575,GO:0005622,GO:0005623,GO:0005634,GO:0005694,GO:0005737,GO:0005829,GO:0031974,GO:0031981,GO:0043226,GO:0043227,GO:0043228,GO:0043229,GO:0043231,GO:0043232,GO:0043233,GO:0044422,GO:0044424,GO:0044427,GO:0044428,GO:0044444,GO:0044446,GO:0044454,GO:0044464,GO:0070013			fuNOG[21]	03SVA@ascNOG,0PPZI@fuNOG,13TPR@opiNOG,COG2940@NOG,KOG2084@euNOG	NA|NA|NA	B	SET domain-containing protein 5
cF05867	441959.XP_002340092.1	1e-42	180.3			K08794		fuNOG[21]	03WJC@ascNOG,0M8D3@euroNOG,0PUD9@fuNOG,0YA63@NOG,142YJ@opiNOG,KOG0615@euNOG	NA|NA|NA	T	STYKc
cF05868	306901.XP_001228251.1	6.2e-33	147.1	FG01559.1				fuNOG[21]	03ZWV@ascNOG,0CWDQ@chaNOG,0PXUU@fuNOG,0XRMJ@NOG,146DN@opiNOG,19U23@sordNOG,1AFIG@sorNOG,KOG0032@euNOG	NA|NA|NA	T	Protein tyrosine kinase
cF05870	441959.XP_002340092.1	1.2e-37	163.7			K08794		fuNOG[21]	03WJC@ascNOG,0M8D3@euroNOG,0PUD9@fuNOG,0YA63@NOG,142YJ@opiNOG,KOG0615@euNOG	NA|NA|NA	T	STYKc
cF05902	861557.XP_003304691.1	1.4e-47	196.4					fuNOG[21]	03KAH@ascNOG,0HBCW@dotNOG,0J1KC@euNOG,0PM0Q@fuNOG,13H8U@opiNOG,15CWN@pleNOG,COG0542@NOG	NA|NA|NA	O	AAA domain (Cdc48 subfamily)
cF05903	861557.XP_003304691.1	1.8e-95	355.5					fuNOG[21]	03KAH@ascNOG,0HBCW@dotNOG,0J1KC@euNOG,0PM0Q@fuNOG,13H8U@opiNOG,15CWN@pleNOG,COG0542@NOG	NA|NA|NA	O	AAA domain (Cdc48 subfamily)
cF05962	51453.JGI79222	6.9e-24	115.9					fuNOG[21]	03SWP@ascNOG,0IZQV@euNOG,0PQFT@fuNOG,0SIWC@hypNOG,123IY@NOG,13TUM@opiNOG,19QXW@sordNOG	NA|NA|NA	S	Zinc finger protein
cF05963	5062.CADAORAP00003548	8.5e-20	102.4					fuNOG[21]	03SWP@ascNOG,0IZQV@euNOG,0M8ZN@euroNOG,0PQFT@fuNOG,123IY@NOG,13TUM@opiNOG	NA|NA|NA	S	Zinc finger protein
cF06006	5022.CBX96780	7.8e-23	114	FG06722.1	GO:0005575,GO:0005622,GO:0005623,GO:0005634,GO:0005730,GO:0005737,GO:0005739,GO:0031974,GO:0031981,GO:0043226,GO:0043227,GO:0043228,GO:0043229,GO:0043231,GO:0043232,GO:0043233,GO:0044422,GO:0044424,GO:0044428,GO:0044444,GO:0044446,GO:0044464,GO:0070013			fuNOG[21]	03PQY@ascNOG,0H7NP@dotNOG,0IJQH@euNOG,0PKPC@fuNOG,123BC@NOG,13JEJ@opiNOG,159TF@pleNOG	NA|NA|NA	S	Inherit from ascNOG: good for full dbp5 activity protein 2
cF06035	9669.ENSMPUP00000015517	3e-07	62					fuNOG[21]	0A0KX@biNOG,0C8KS@carNOG,0DN8C@chorNOG,0URIA@maNOG,0VBH4@meNOG,13BTI@opiNOG,1CX4X@veNOG,COG5048@NOG,KOG1721@euNOG	NA|NA|NA	K	zinc finger protein 774
cF06062	29850.GGTG_10475T0	2.7e-35	154.8					fuNOG[21]	03YWY@ascNOG,0JAWD@euNOG,0PWJ2@fuNOG,0UEK8@magNOG,11CII@NOG,143Z3@opiNOG,19Q7P@sordNOG	NA|NA|NA
cF06109	140110.NechaP88143	1.3e-23	115.9	FG01146.1	GO:0007275,GO:0008150,GO:0032501,GO:0032502,GO:0043581,GO:0044699,GO:0044707,GO:0044767,GO:0048856			fuNOG[21]	03VKN@ascNOG,0J2TB@euNOG,0PSWG@fuNOG,0SFMU@hypNOG,0X1J1@necNOG,11CN6@NOG,13Y6I@opiNOG,19SFN@sordNOG	NA|NA|NA
cF06110	140110.NechaP86004	9e-16	89					fuNOG[21]	03VK1@ascNOG,0J2IR@euNOG,0PSH3@fuNOG,12D77@NOG,13XSC@opiNOG	NA|NA|NA
cF06111	5057.CADACLAP00004434	2.7e-54	219.2					fuNOG[21]	03RBD@ascNOG,0IWA9@euNOG,0M426@euroNOG,0MQBD@eurotNOG,0PNA7@fuNOG,0YD1Z@NOG,13QZF@opiNOG	NA|NA|NA	S	NACHT domain
cF06113	573729.XP_003666291.1	1.1e-14	86.3					fuNOG[21]	03T5J@ascNOG,0CX0W@chaNOG,0J02F@euNOG,0PPZ0@fuNOG,128ED@NOG,13TRW@opiNOG,19S07@sordNOG,1AFFS@sorNOG	NA|NA|NA
cF06129	663202.XP_003023929.1	1.6e-25	120.9					fuNOG[21]	042VI@ascNOG,0JNEE@euNOG,0MA05@euroNOG,0Q08D@fuNOG,12KAD@onyNOG,14CTH@opiNOG,COG3654@NOG	NA|NA|NA	S	Fic/DOC family
cF06133	51453.JGI41663	1.5e-07	61.6	FG01401.1				fuNOG[21]	04BCN@ascNOG,0KNF7@euNOG,0Q9EE@fuNOG,0SF2U@hypNOG,10XI3@NOG,1380F@opiNOG,1A33V@sordNOG	NA|NA|NA
cF06183	578455.XP_003656751.1	2.5e-28	131.7					fuNOG[21]	03RRJ@ascNOG,0CWN6@chaNOG,0IYAE@euNOG,0PNR1@fuNOG,11INA@NOG,13S05@opiNOG,19RXS@sordNOG,1ADF9@sorNOG	NA|NA|NA
cF06184	515849.XP_001910544.1	8.9e-37	159.5					fuNOG[21]	03RRJ@ascNOG,0IYAE@euNOG,0PNR1@fuNOG,11INA@NOG,13S05@opiNOG,19RXS@sordNOG,1ADF9@sorNOG	NA|NA|NA
cF06185	578455.XP_003656751.1	2.3e-49	201.4					fuNOG[21]	03RRJ@ascNOG,0CWN6@chaNOG,0IYAE@euNOG,0PNR1@fuNOG,11INA@NOG,13S05@opiNOG,19RXS@sordNOG,1ADF9@sorNOG	NA|NA|NA
cF06302	148305.A4R9E7	2.7e-16	92					fuNOG[21]	03KVQ@ascNOG,0IJSY@euNOG,0PIJH@fuNOG,0UAKW@magNOG,11Q1Q@NOG,13KVC@opiNOG,19N45@sordNOG	NA|NA|NA
cF06308	140110.NechaP97336	3.8e-15	89					fuNOG[21]	03WZ5@ascNOG,0JBAF@euNOG,0PVR6@fuNOG,0SBF0@hypNOG,115J5@NOG,141H4@opiNOG,19QNB@sordNOG	NA|NA|NA	S	Phosphotransferase enzyme family
cF06312	40559.EDN32802	1.9e-12	78.6					fuNOG[21]	041AU@ascNOG,0JHGN@euNOG,0PZ1J@fuNOG,0Z287@NOG,14B7Q@opiNOG	NA|NA|NA
cF06316	559305.XP_003238494.1	2.7e-14	83.6					fuNOG[21]	031N5@arthNOG,040I7@ascNOG,0JFG2@euNOG,0M9CF@euroNOG,0PY7Z@fuNOG,114WY@NOG,12KCM@onyNOG,147J0@opiNOG	NA|NA|NA
cF06320	148304.MAPG_10055T0	3.2e-10	71.2					fuNOG[21]	049AJ@ascNOG,0KKC2@euNOG,0Q6NZ@fuNOG,0UF4E@magNOG,117HV@NOG,13612@opiNOG,19WXP@sordNOG	NA|NA|NA
cF06324	29850.GGTG_06358T0	2.2e-26	125.9	FG01264.1				fuNOG[21]	03TF7@ascNOG,0IZPP@euNOG,0PQHZ@fuNOG,0UC96@magNOG,12C3E@NOG,13U0F@opiNOG,19Y6N@sordNOG	NA|NA|NA	S	Inherit from ascNOG: Conserved hypothetical protein
cF06402	5507.FOXG_02915P0	2e-08	65.1					fuNOG[21]	03ZPC@ascNOG,0JREN@euNOG,0PXBG@fuNOG,0SIXZ@hypNOG,0ZMHH@NOG,14FUJ@opiNOG,1A39N@sordNOG	NA|NA|NA	S	BTB
cF06414	423536.XP_002773556.1	8.3e-14	84					fuNOG[21]	COG5491@NOG,KOG3229@euNOG	NA|NA|NA	U	Charged multivesicular body protein
cF06421	208348.PTTG_00528P0	4.6e-12	76.6	FG02685.1				fuNOG[21]	0IZ74@euNOG,0PQ78@fuNOG,11PAQ@NOG,13SH2@opiNOG	NA|NA|NA
cF06438	5507.FOXG_06095P0	7.8e-63	246.1	NAT2				fuNOG[21]	04A7N@ascNOG,0IIB4@euNOG,0QAHT@fuNOG,0SI5H@hypNOG,136WU@opiNOG,1A5GF@sordNOG,COG2162@NOG	NA|NA|NA	Q	Arylamine N-acetyltransferase 2
cF06572	29850.GGTG_02485T0	2.9e-13	81.3	FG00785.1				fuNOG[21]	03W3J@ascNOG,0J5Q8@euNOG,0PU1Z@fuNOG,0U7CD@magNOG,0Z56M@NOG,13ZHY@opiNOG,19TC8@sordNOG	NA|NA|NA
cF06579	29850.GGTG_12540T0	1.5e-13	82	FG00785.1				fuNOG[21]	03W3J@ascNOG,0J5Q8@euNOG,0PU1Z@fuNOG,0Z56M@NOG,13ZHY@opiNOG,19TC8@sordNOG	NA|NA|NA
cF06580	148304.MAPG_09107T0	2.5e-11	74.7	FG00785.1				fuNOG[21]	03W3J@ascNOG,0J5Q8@euNOG,0PU1Z@fuNOG,0U7CD@magNOG,0Z56M@NOG,13ZHY@opiNOG,19TC8@sordNOG	NA|NA|NA
cF06612	5061.CADANGAP00008156	3.1e-79	300.8					fuNOG[21]	03XX5@ascNOG,0PVMF@fuNOG,142SN@opiNOG,COG0388@NOG,KOG0805@euNOG	NA|NA|NA	E	Carbon-nitrogen hydrolase
cF06692	51453.JGI41663	5.7e-11	73.2	FG01401.1				fuNOG[21]	04BCN@ascNOG,0KNF7@euNOG,0Q9EE@fuNOG,0SF2U@hypNOG,10XI3@NOG,1380F@opiNOG,1A33V@sordNOG	NA|NA|NA
cF06693	117187.FVEG_09477T0	3e-09	67.8	FG01401.1				fuNOG[21]	04BCN@ascNOG,0KNF7@euNOG,0Q9EE@fuNOG,0SF2U@hypNOG,0WY1I@necNOG,10XI3@NOG,1380F@opiNOG,1A33V@sordNOG	NA|NA|NA
cF06695	578458.XP_003026237.1	1.4e-17	95.5			K03469		fuNOG[21]	01APZ@agaNOG,01GBZ@agarNOG,0976S@basNOG,0PY79@fuNOG,1483G@opiNOG,COG0328@NOG,KOG3752@euNOG	NA|NA|NA	L	Pfam:RnaseH
cF06705	441959.XP_002481098.1	9.9e-64	248.8	FG10922.1	GO:0005575,GO:0005618,GO:0005623,GO:0030312,GO:0031160,GO:0044464,GO:0071944			fuNOG[21]	03RA9@ascNOG,0IWZW@euNOG,0MD62@euroNOG,0MMNR@eurotNOG,0PN6V@fuNOG,13Q5T@opiNOG,COG4305@NOG	NA|NA|NA	G	cellulase
cF06727	575587.HMPREF0026_01933	1.4e-13	83.6					fuNOG[21]	05C1J@bactNOG,0QI2F@gproNOG,16PDE@proNOG,COG0513@NOG	NA|NA|NA	L	ATP-dependent RNA helicase
cF06728	4950.XP_003679102.1	2e-30	139	DED1	GO:0002181,GO:0002183,GO:0003674,GO:0003676,GO:0003723,GO:0003724,GO:0003725,GO:0003727,GO:0003824,GO:0004004,GO:0004386,GO:0005488,GO:0005575,GO:0005622,GO:0005623,GO:0005634,GO:0005737,GO:0005829,GO:0006139,GO:0006152,GO:0006163,GO:0006195,GO:0006200,GO:0006412,GO:0006413,GO:0006725,GO:0006753,GO:0006793,GO:0006796,GO:0006807,GO:0006950,GO:0006970,GO:0007346,GO:0008026,GO:0008150,GO:0008152,GO:…	K11594		fuNOG[21]	03IW9@ascNOG,0PFY4@fuNOG,0XNTI@NOG,12N5P@opiNOG,19861@saccNOG,19EGR@sacNOG,KOG0335@euNOG	NA|NA|NA	J	ATP-binding RNA helicase involved in translation initiation. Remodels RNA in response to ADP and ATP concentrations by facilitating disruption, but also formation of RNA duplexes (By similarity)
cF06729	4932.YOR204W	2.7e-27	129	DED1	GO:0002181,GO:0002183,GO:0003674,GO:0003676,GO:0003723,GO:0003724,GO:0003725,GO:0003727,GO:0003824,GO:0004004,GO:0004386,GO:0005488,GO:0005575,GO:0005622,GO:0005623,GO:0005634,GO:0005737,GO:0005829,GO:0006139,GO:0006152,GO:0006163,GO:0006195,GO:0006200,GO:0006412,GO:0006413,GO:0006725,GO:0006753,GO:0006793,GO:0006796,GO:0006807,GO:0006950,GO:0006970,GO:0007346,GO:0008026,GO:0008150,GO:0008152,GO:…	K11594		fuNOG[21]	03IW9@ascNOG,0PFY4@fuNOG,0XNTI@NOG,12N5P@opiNOG,19861@saccNOG,19EGR@sacNOG,KOG0335@euNOG	NA|NA|NA	J	ATP-binding RNA helicase involved in translation initiation. Remodels RNA in response to ADP and ATP concentrations by facilitating disruption, but also formation of RNA duplexes (By similarity)
cF06734	4113.PGSC0003DMT400046821	2.2e-17	96.3					fuNOG[21]	1BF80@strNOG,1DT6A@virNOG,COG0513@NOG,KOG0331@euNOG	NA|NA|NA	A	DEAD-box ATP-dependent RNA helicase
cF06787	4577.GRMZM5G883759_P01	5.1e-09	68.6					fuNOG[21]	0JXKW@euNOG,0U5N9@lilNOG,103VQ@NOG,1630M@poaNOG,1C4S2@strNOG,1EIBI@virNOG	NA|NA|NA
cF06847	426418.XP_001936757.1	1.2e-13	83.2			K11268		fuNOG[21]	03VJR@ascNOG,0HAI4@dotNOG,0PSB9@fuNOG,0XTJX@NOG,13M0D@opiNOG,15D9E@pleNOG,KOG3014@euNOG	NA|NA|NA	L	Inherit from opiNOG: Sister chromatid cohesion
cF06930	5022.CBX93514	4.5e-20	105.5					fuNOG[21]	03UXM@ascNOG,0HAFN@dotNOG,0J47D@euNOG,0PT4X@fuNOG,123VP@NOG,13XUW@opiNOG,159BD@pleNOG	NA|NA|NA	S	GAL4
cF06959	1047171.EFQ26030	2.4e-32	145.2					fuNOG[21]	03TBY@ascNOG,0H6SJ@dotNOG,0IZMV@euNOG,0PQE9@fuNOG,0YCRB@NOG,13T94@opiNOG	NA|NA|NA	S	Heterokaryon incompatibility protein (HET)
cF06992	861557.XP_003306206.1	1.2e-10	73.2					fuNOG[21]	041VR@ascNOG,0JN6X@euNOG,0PZKJ@fuNOG,118S8@NOG,14BWH@opiNOG	NA|NA|NA
cF07005	578455.XP_003657613.1	3.1e-31	142.9					fuNOG[21]	03JFF@ascNOG,0CX8R@chaNOG,0IZKJ@euNOG,0PGHH@fuNOG,0ZR40@NOG,12P35@opiNOG,19K8A@sordNOG,1AF4H@sorNOG	NA|NA|NA
cF07042	502779.XP_002792407.1	5.5e-12	75.9					fuNOG[21]	03U5F@ascNOG,0J1VV@euNOG,0M8ZC@euroNOG,0PRQC@fuNOG,1232B@NOG,12I8Q@onyNOG,13UHM@opiNOG	NA|NA|NA	S	Inherit from euroNOG: conserved hypothetical protein
cF07062	162425.CADANIAP00007826	1.8e-96	357.8					fuNOG[21]	03SSP@ascNOG,0ITQA@euNOG,0M4N6@euroNOG,0MHDB@eurotNOG,0PM9B@fuNOG,13KYB@opiNOG,COG0491@NOG	NA|NA|NA	S	Lactamase_B
cF07073	164328.Phyra74116	3.1e-08	65.5					fuNOG[21]	COG0515@NOG,COG0666@NOG,KOG0192@euNOG,KOG4177@euNOG	NA|NA|NA	T	protein kinase kinase kinase
cF07084	13684.SNOT_11515	2.5e-17	94					fuNOG[21]	03UW2@ascNOG,0H8YX@dotNOG,0J469@euNOG,0PS6P@fuNOG,0XW77@NOG,13XP4@opiNOG,15EU9@pleNOG	NA|NA|NA
cF07099	140110.NechaP82515	8.1e-147	526.2					fuNOG[21]	04C4K@ascNOG,0PUMQ@fuNOG,0SCW1@hypNOG,142BM@opiNOG,1A2EQ@sordNOG,COG0654@NOG,KOG3855@euNOG	NA|NA|NA	C, H	FAD binding domain
cF07103	1047171.EFQ28057	4.8e-07	63.2	SET1	GO:0000003,GO:0000075,GO:0000077,GO:0000183,GO:0000228,GO:0000723,GO:0000785,GO:0000790,GO:0003006,GO:0003674,GO:0003676,GO:0003723,GO:0003824,GO:0005488,GO:0005575,GO:0005622,GO:0005623,GO:0005634,GO:0005654,GO:0005694,GO:0005737,GO:0006139,GO:0006259,GO:0006325,GO:0006338,GO:0006342,GO:0006348,GO:0006355,GO:0006357,GO:0006464,GO:0006479,GO:0006725,GO:0006807,GO:0006950,GO:0006974,GO:0006996,GO:…	K11422		fuNOG[21]	03K51@ascNOG,0H63M@dotNOG,0PH74@fuNOG,12NHN@opiNOG,COG2940@NOG,KOG1080@euNOG	NA|NA|NA	B, K	Histone lysine methyltransferase SET associated
cF07110	140110.NechaP83082	4.4e-07	60.5					fuNOG[21]	03SHH@ascNOG,0IYCR@euNOG,0PPIJ@fuNOG,0SIHK@hypNOG,0X0U7@necNOG,0YIE5@NOG,13S3E@opiNOG,19RBK@sordNOG	NA|NA|NA
cF07122	5022.CBX96619	1.1e-66	260	FG07140.1	GO:0000070,GO:0000228,GO:0000278,GO:0000280,GO:0000723,GO:0000781,GO:0000782,GO:0000783,GO:0000784,GO:0000819,GO:0003674,GO:0003676,GO:0003677,GO:0003697,GO:0005488,GO:0005575,GO:0005622,GO:0005623,GO:0005634,GO:0005694,GO:0005737,GO:0005829,GO:0006139,GO:0006259,GO:0006260,GO:0006278,GO:0006725,GO:0006807,GO:0006996,GO:0007004,GO:0007049,GO:0007059,GO:0007067,GO:0007088,GO:0007346,GO:0008150,GO:…			fuNOG[21]	03SAI@ascNOG,0H84E@dotNOG,0PPCE@fuNOG,0Z1J0@NOG,13RHA@opiNOG,157Z8@pleNOG,KOG4757@euNOG	NA|NA|NA	S	Pfam:Telo_bind
cF07126	771870.XP_003352703.1	1.4e-50	204.5					fuNOG[21]	04DSY@ascNOG,0IREJ@euNOG,0QDWR@fuNOG,0YB9H@NOG,13E3N@opiNOG,19VFM@sordNOG,1AD1G@sorNOG	NA|NA|NA	S	Major Facilitator Superfamily
cF07159	5057.CADACLAP00007281	2.5e-07	61.2					fuNOG[21]	03ZPC@ascNOG,0JREN@euNOG,0M8NU@euroNOG,0MTFK@eurotNOG,0PXBG@fuNOG,0ZMHH@NOG,14FUJ@opiNOG	NA|NA|NA	S	Inherit from euroNOG: BTB/POZ domain
cF07160	7668.SPU_008405tr	2.1e-07	61.6					fuNOG[21]	09Y7N@biNOG,0IEDY@euNOG,0V957@meNOG,0Y2DF@NOG,13HWH@opiNOG	NA|NA|NA	K	leucine-zipper-like transcription regulator 1
cF07164	140110.NechaP92278	9.2e-33	146.4	FG02892.1				fuNOG[21]	04AP8@ascNOG,0KNYK@euNOG,0QA2U@fuNOG,0SJBF@hypNOG,0WXSK@necNOG,137BY@opiNOG,1A4GZ@sordNOG,COG1028@NOG	NA|NA|NA	Q	KR domain
cF07165	40559.EDN24637	2.5e-66	258.1					fuNOG[21]	03JPY@ascNOG,0PK2E@fuNOG,13INC@opiNOG,COG3491@NOG,KOG0143@euNOG	NA|NA|NA	Q	2OG-Fe(II) oxygenase superfamily
cF07188	5022.CBX90938	7.4e-38	164.1					fuNOG[21]	04CED@ascNOG,0HAW0@dotNOG,0IM41@euNOG,0QCXF@fuNOG,1122S@NOG,139XE@opiNOG,15DB5@pleNOG	NA|NA|NA
cF07191	5022.CBX95596	8.2e-35	153.3					fuNOG[21]	03TC0@ascNOG,0HB91@dotNOG,0IZB2@euNOG,0PQEF@fuNOG,0YGBF@NOG,13TGJ@opiNOG,15CQN@pleNOG	NA|NA|NA	T	STYKc
cF07207	515849.XP_001905101.1	4.2e-26	125.2	FG04076.1				fuNOG[21]	03Q2Y@ascNOG,0IVT5@euNOG,0PI9C@fuNOG,1217W@NOG,13MCM@opiNOG,19N5Z@sordNOG,1A9QV@sorNOG	NA|NA|NA
cF07244	426418.XP_001937524.1	5.1e-73	279.6	FG08693.1	GO:0003674,GO:0003824,GO:0005575,GO:0005622,GO:0005623,GO:0005737,GO:0005739,GO:0006464,GO:0008150,GO:0008152,GO:0009249,GO:0009987,GO:0016874,GO:0018065,GO:0019538,GO:0036211,GO:0043170,GO:0043226,GO:0043227,GO:0043229,GO:0043231,GO:0043412,GO:0044237,GO:0044238,GO:0044260,GO:0044267,GO:0044424,GO:0044444,GO:0044464,GO:0071704	K03801		fuNOG[21]	03SWK@ascNOG,0H91H@dotNOG,0PPYW@fuNOG,13PU9@opiNOG,15A0S@pleNOG,COG0321@NOG,KOG0325@euNOG	NA|NA|NA	H	Catalyzes the transfer of endogenously produced octanoic acid from octanoyl-acyl-carrier-protein onto the lipoyl domains of lipoate-dependent enzymes. Lipoyl-ACP can also act as a substrate although octanoyl-ACP is likely to be the physiological substrate (By similarity)
cF07290	441960.XP_002152592.1	1.6e-07	62.4					fuNOG[21]	03ZBA@ascNOG,0JC52@euNOG,0MBQT@euroNOG,0MPTP@eurotNOG,0PWSQ@fuNOG,0ZC2F@NOG,144GI@opiNOG	NA|NA|NA
cF07297	29850.GGTG_09773T0	4.6e-38	163.7	FG08369.1				fuNOG[21]	03Q3C@ascNOG,0IJAG@euNOG,0PFV0@fuNOG,0UCQN@magNOG,10HUJ@NOG,13K20@opiNOG,19PXI@sordNOG	NA|NA|NA	S	Fungal_trans
cF07326	5141.EFNCRP00000008427	4.3e-10	70.1	CDC73	GO:0000018,GO:0000414,GO:0000416,GO:0000428,GO:0000785,GO:0000988,GO:0000989,GO:0000993,GO:0001076,GO:0001083,GO:0001089,GO:0001098,GO:0001099,GO:0001932,GO:0001934,GO:0003674,GO:0003682,GO:0005488,GO:0005515,GO:0005575,GO:0005622,GO:0005623,GO:0005634,GO:0005654,GO:0005694,GO:0005737,GO:0005829,GO:0006139,GO:0006282,GO:0006351,GO:0006354,GO:0006355,GO:0006356,GO:0006357,GO:0006360,GO:0006362,GO:…	K15175		fuNOG[21]	03Q31@ascNOG,0PK36@fuNOG,12QWT@opiNOG,19PC0@sordNOG,1AB58@sorNOG,COG5157@NOG,KOG3786@euNOG	NA|NA|NA	K	RNA pol II accessory factor, Cdc73 family
cF07360	5085.CADAFUBP00004663	6.8e-21	106.7					fuNOG[21]	COG0775@NOG	NA|NA|NA	F	Catalyzes the irreversible cleavage of the glycosidic bond in both 5'-methylthioadenosine (MTA) and S- adenosylhomocysteine (SAH AdoHcy) to adenine and the corresponding thioribose, 5'-methylthioribose and S-ribosylhomocysteine, respectively (By similarity)
cF07362	29875.EHK16148	3e-62	245.7					fuNOG[21]	03NY4@ascNOG,0IVFX@euNOG,0PJWB@fuNOG,0SBCK@hypNOG,13N4E@opiNOG,19KTR@sordNOG,COG0775@NOG	NA|NA|NA	F	Phosphorylase superfamily
cF07368	162425.CADANIAP00009641	6.5e-138	496.1					fuNOG[21]	040C4@ascNOG,0JED4@euNOG,0PY1P@fuNOG,100XM@NOG,1470P@opiNOG	NA|NA|NA
cF07372	441960.XP_002152919.1	3.1e-29	134					fuNOG[21]	03WQR@ascNOG,0MBD9@euroNOG,0MS2Z@eurotNOG,0PW27@fuNOG,143IR@opiNOG,COG2124@NOG,KOG0157@euNOG	NA|NA|NA	Q	Benzoate 4-monooxygenase cytochrome P450
cF07376	5057.CADACLAP00006160	4e-07	61.6	STI1	GO:0000902,GO:0000904,GO:0003674,GO:0003676,GO:0003723,GO:0003729,GO:0004857,GO:0005488,GO:0005515,GO:0005575,GO:0005622,GO:0005623,GO:0005634,GO:0005737,GO:0005794,GO:0005829,GO:0006457,GO:0006928,GO:0006935,GO:0006950,GO:0007275,GO:0007399,GO:0007409,GO:0007411,GO:0008150,GO:0008152,GO:0009605,GO:0009653,GO:0009987,GO:0016043,GO:0019222,GO:0019538,GO:0022008,GO:0030030,GO:0030154,GO:0030182,GO:…	K09553,K16365		fuNOG[21]	03KUS@ascNOG,0PITI@fuNOG,0XTCJ@NOG,12N8B@opiNOG,KOG0548@euNOG	NA|NA|NA	O	Heat shock protein
cF07422	338963.Pcar_1372	4.7e-08	64.7					fuNOG[21]	05C8Q@bactNOG,0GBDX@delNOG,0HCUX@dproNOG,16PCR@proNOG,COG0840@NOG	NA|NA|NA	S	Methyl-accepting chemotaxis sensory transducer
cF07423	338963.Pcar_2354	4.1e-11	74.7					fuNOG[21]	05CCP@bactNOG,0GAT1@delNOG,0HBVE@dproNOG,16PX1@proNOG,COG0552@NOG	NA|NA|NA	U	Involved in targeting and insertion of nascent membrane proteins into the cytoplasmic membrane. Acts as a receptor for the complex formed by the signal recognition particle (SRP) and the ribosome-nascent chain (RNC). Interaction with SRP-RNC leads to the transfer of the RNC complex to the Sec translocase for insertion into the membrane, the hydrolysis of GTP by both Ffh and FtsY, and the dissocia…
cF07438	559298.XP_002623872.1	7.9e-17	93.6	PGUG_00396	GO:0005575,GO:0005622,GO:0005623,GO:0005737,GO:0005739,GO:0043226,GO:0043227,GO:0043229,GO:0043231,GO:0044424,GO:0044444,GO:0044464			fuNOG[21]	03P74@ascNOG,0M6GB@euroNOG,0PGK6@fuNOG,12FC5@onyNOG,12UDU@opiNOG,COG1774@NOG,KOG4679@euNOG	NA|NA|NA	S	PSP1 domain-containing protein
cF07467	426418.XP_001942465.1	1.1e-17	95.9					fuNOG[21]	03IYW@ascNOG,0PI7H@fuNOG,13JQ5@opiNOG,COG0514@NOG,KOG0353@euNOG	NA|NA|NA	L	Protein of unknown function (DUF3505)
cF07468	5180.EDN97519	7e-23	112.1					fuNOG[21]	03NYZ@ascNOG,0PMMD@fuNOG,13NJ3@opiNOG,COG2801@NOG,KOG0017@euNOG	NA|NA|NA	L	Inherit from KOG: Retrotransposon protein
cF07474	554155.XP_002844691.1	2.2e-76	292.7					fuNOG[21]	03M17@ascNOG,0IV0J@euNOG,0M460@euroNOG,0PI2E@fuNOG,0YBP8@NOG,12HYG@onyNOG,13JKM@opiNOG	NA|NA|NA	S	Inherit from ascNOG: Conserved hypothetical protein
cF07475	554155.XP_002844691.1	6.2e-68	264.2					fuNOG[21]	03M17@ascNOG,0IV0J@euNOG,0M460@euroNOG,0PI2E@fuNOG,0YBP8@NOG,12HYG@onyNOG,13JKM@opiNOG	NA|NA|NA	S	Inherit from ascNOG: Conserved hypothetical protein
cF07476	554155.XP_002844691.1	7e-68	264.2					fuNOG[21]	03M17@ascNOG,0IV0J@euNOG,0M460@euroNOG,0PI2E@fuNOG,0YBP8@NOG,12HYG@onyNOG,13JKM@opiNOG	NA|NA|NA	S	Inherit from ascNOG: Conserved hypothetical protein
cF07535	222929.XP_003068461.1	4.3e-99	368.6	FG06312.1				fuNOG[21]	03IDT@ascNOG,0IJ5X@euNOG,0M5X3@euroNOG,0PFEH@fuNOG,0ZHQS@NOG,12IWZ@onyNOG,14CNI@opiNOG	NA|NA|NA	S	Inherit from euroNOG: MYND finger
cF07543	5059.CADAFLAP00012456	2.1e-214	750.4	FG11519.1				fuNOG[21]	03Y34@ascNOG,0MBZZ@euroNOG,0MJYE@eurotNOG,0PVTK@fuNOG,141FN@opiNOG,COG0477@NOG,KOG2533@euNOG	NA|NA|NA	G	Major Facilitator Superfamily
cF07544	140110.NechaP85587	6.1e-128	462.2	FG11518.1		K02510		fuNOG[21]	03Y7U@ascNOG,0IIMJ@euNOG,0PJK5@fuNOG,0SGFP@hypNOG,0WXDM@necNOG,13N2G@opiNOG,1A5HR@sordNOG,COG3836@NOG	NA|NA|NA	G	HpcH/HpaI aldolase/citrate lyase family
cF07545	5061.CADANGAP00009761	4.3e-54	215.7	FG11521.1	GO:0005575,GO:0005622,GO:0005623,GO:0005634,GO:0005737,GO:0005739,GO:0006082,GO:0006520,GO:0006549,GO:0006807,GO:0008150,GO:0008152,GO:0008652,GO:0009058,GO:0009081,GO:0009082,GO:0009097,GO:0009987,GO:0016053,GO:0019752,GO:0043226,GO:0043227,GO:0043229,GO:0043231,GO:0043436,GO:0044237,GO:0044238,GO:0044249,GO:0044281,GO:0044283,GO:0044424,GO:0044444,GO:0044464,GO:0044710,GO:0044711,GO:0046394,GO:…			fuNOG[21]	03ZAK@ascNOG,0MBYU@euroNOG,0MNNR@eurotNOG,0PX18@fuNOG,144UW@opiNOG,COG0251@NOG,KOG2317@euNOG	NA|NA|NA	J	Endoribonuclease L-PSP
cF07546	441959.XP_002484715.1	4.2e-210	735.7	FG11522.1				fuNOG[21]	03XY7@ascNOG,0MBZK@euroNOG,0MKRE@eurotNOG,0PU9J@fuNOG,140T9@opiNOG,COG3491@NOG,KOG0143@euNOG	NA|NA|NA	Q	gibberellin 3-beta hydroxylase
cF07547	5059.CADAFLAP00012455	2.6e-169	600.9	FG11520.1				fuNOG[21]	03X3Z@ascNOG,0JACB@euNOG,0MAIC@euroNOG,0MIQC@eurotNOG,0PUVK@fuNOG,0Y8ZT@NOG,143U4@opiNOG	NA|NA|NA	S	Fungal specific transcription factor domain
cF07549	861557.XP_003305142.1	9.6e-13	78.6	FG04508.1				fuNOG[21]	03K11@ascNOG,0IESH@euNOG,0PH3D@fuNOG,0Y987@NOG,12PNU@opiNOG	NA|NA|NA
cF07560	246410.XP_001240258.1	9.4e-42	175.3					fuNOG[21]	042FN@ascNOG,0JP7E@euNOG,0M9YM@euroNOG,0Q0GF@fuNOG,11DYN@NOG,12K9T@onyNOG,14DKY@opiNOG	NA|NA|NA
cF07576	1047171.EFQ28927	4.4e-28	131			K03469		fuNOG[21]	03TH4@ascNOG,0PQK2@fuNOG,13U67@opiNOG,COG0328@NOG,KOG3752@euNOG	NA|NA|NA	L	Pfam:RnaseH
cF07577	5059.CADAFLAP00007103	8.9e-105	385.6			K11517		fuNOG[21]	03KZU@ascNOG,0MARE@euroNOG,0MMTY@eurotNOG,0PKHE@fuNOG,12Q5I@opiNOG,COG1304@NOG,KOG0538@euNOG	NA|NA|NA	C	FMN-dependent dehydrogenase
cF07616	573729.XP_003658838.1	2.1e-19	102.4					fuNOG[21]	03TVM@ascNOG,0CVFF@chaNOG,0J1WQ@euNOG,0PR97@fuNOG,124V2@NOG,13VBX@opiNOG,19V1F@sordNOG,1AE9B@sorNOG	NA|NA|NA
cF07621	5180.EDN97747	5.7e-14	84	FG09092.1				fuNOG[21]	03RBJ@ascNOG,0IW5M@euNOG,0PMXZ@fuNOG,11MPC@NOG,13QDX@opiNOG	NA|NA|NA	S	conserved hypothetical protein
cF07633	5059.CADAFLAP00011299	1.5e-40	174.1					fuNOG[21]	03WY6@ascNOG,0JAZY@euNOG,0PWBS@fuNOG,0YF1X@NOG,142C7@opiNOG	NA|NA|NA	S	Protein of unknown function (DUF3433)
cF07672	162425.CADANIAP00006533	1.5e-72	278.5	MTR	GO:0005575,GO:0016020			fuNOG[21]	03N0E@ascNOG,0IVIU@euNOG,0MENV@euroNOG,0MKXE@eurotNOG,0PJ8V@fuNOG,0ZHR9@NOG,13PBX@opiNOG	NA|NA|NA	E	amino acid
cF07673	140110.NechaP83581	4.7e-142	510.8	FG04965.1				fuNOG[21]	03RK6@ascNOG,0IW0S@euNOG,0PNFU@fuNOG,0SIH3@hypNOG,0WVWD@necNOG,119TS@NOG,13QTP@opiNOG,19QGC@sordNOG	NA|NA|NA	S	Heterokaryon incompatibility protein (HET)
cF07674	559305.XP_003231600.1	1.3e-51	211.1					fuNOG[21]	02UVE@arthNOG,03UU4@ascNOG,0J2AK@euNOG,0M5UH@euroNOG,0PS4H@fuNOG,0YBR9@NOG,12GUP@onyNOG,13XYU@opiNOG	NA|NA|NA
cF07691	573729.XP_003663140.1	3.2e-18	98.6					fuNOG[21]	03TJA@ascNOG,0J28N@euNOG,0PRBE@fuNOG,0YRD2@NOG,13VDS@opiNOG	NA|NA|NA
cF07693	336963.XP_002540754.1	6.5e-19	100.9					fuNOG[21]	03ZBD@ascNOG,0JC69@euNOG,0M82T@euroNOG,0PX2B@fuNOG,11E8K@NOG,12K02@onyNOG,144Y9@opiNOG	NA|NA|NA
cF07694	306902.XP_002618417.1	6.7e-08	63.5	HOS4	GO:0000118,GO:0000228,GO:0000785,GO:0000790,GO:0005575,GO:0005622,GO:0005623,GO:0005634,GO:0005654,GO:0005694,GO:0006325,GO:0006464,GO:0006476,GO:0006996,GO:0008150,GO:0008152,GO:0009987,GO:0010564,GO:0010948,GO:0016043,GO:0016568,GO:0016569,GO:0016570,GO:0016575,GO:0019538,GO:0031974,GO:0031981,GO:0032991,GO:0034967,GO:0035601,GO:0036211,GO:0040020,GO:0043170,GO:0043226,GO:0043227,GO:0043228,GO:…	K06867		fuNOG[21]	03N05@ascNOG,0PM1H@fuNOG,12S70@opiNOG,1987B@saccNOG,COG0666@NOG,KOG0504@euNOG	NA|NA|NA	S	Ankyrin repeat
cF07695	148304.MAPG_06916T0	1.4e-29	136					fuNOG[21]	03T78@ascNOG,0J04B@euNOG,0PQ9U@fuNOG,0UEPG@magNOG,12BKH@NOG,13SHV@opiNOG,19RN9@sordNOG	NA|NA|NA	S	Inherit from sordNOG: Ankyrin repeat
cF07698	5061.CADANGAP00013252	1.3e-149	537	FG07267.1				fuNOG[21]	03KXY@ascNOG,0M627@euroNOG,0MKNI@eurotNOG,0PJEH@fuNOG,12PQE@opiNOG,COG0553@NOG,KOG1015@euNOG	NA|NA|NA	K	SNF2 family helicase ATPase
cF07699	5507.FOXG_17761P0	2e-08	65.1		GO:0003674,GO:0003824,GO:0003964,GO:0005575,GO:0005622,GO:0005623,GO:0005634,GO:0006950,GO:0008150,GO:0008152,GO:0009987,GO:0016740,GO:0016772,GO:0016779,GO:0033554,GO:0034061,GO:0043226,GO:0043227,GO:0043229,GO:0043231,GO:0044424,GO:0044464,GO:0044699,GO:0044763,GO:0050896,GO:0051716			fuNOG[21]	0PGPZ@fuNOG,12PBX@opiNOG,COG2801@NOG,KOG0017@euNOG	NA|NA|NA	L	to reverse transcriptase
cF07749	229533.XP_386050.1	2.8e-08	65.1	FG05874.1		K17415		fuNOG[21]	03V53@ascNOG,0J3PH@euNOG,0PT0J@fuNOG,0SE40@hypNOG,0WZUC@necNOG,0XWFD@NOG,13YC9@opiNOG,19TG7@sordNOG	NA|NA|NA	S	Ribosomal protein S21
cF07803	861557.XP_003300528.1	1.8e-24	119.8					fuNOG[21]	040F8@ascNOG,0HAG2@dotNOG,0JE9B@euNOG,0PXVM@fuNOG,12CFX@NOG,146DG@opiNOG,157XH@pleNOG	NA|NA|NA	S	Patatin-like phospholipase
cF07856	51453.JGI122500	1e-46	192.6					fuNOG[21]	03TVH@ascNOG,0IMIW@euNOG,0PMR4@fuNOG,0SF9V@hypNOG,11SIS@NOG,13JY4@opiNOG,19QQ6@sordNOG	NA|NA|NA	S	MYND finger
cF07864	5062.CADAORAP00005470	3.3e-08	63.9					fuNOG[21]	03XZF@ascNOG,0IXA9@euNOG,0M6KR@euroNOG,0MRW4@eurotNOG,0PU8N@fuNOG,0YHE4@NOG,13RZ5@opiNOG	NA|NA|NA	S	Phosphotransferase enzyme family
cF07865	336963.XP_002544729.1	1.6e-40	172.9					fuNOG[21]	03RZM@ascNOG,0IXA9@euNOG,0MGK2@euroNOG,0PNZY@fuNOG,0YHE4@NOG,12JHU@onyNOG,13RZ5@opiNOG	NA|NA|NA	S	Inherit from opiNOG: Phosphotransferase enzyme family
cF07866	336963.XP_002544729.1	4.3e-35	154.8					fuNOG[21]	03RZM@ascNOG,0IXA9@euNOG,0MGK2@euroNOG,0PNZY@fuNOG,0YHE4@NOG,12JHU@onyNOG,13RZ5@opiNOG	NA|NA|NA	S	Inherit from opiNOG: Phosphotransferase enzyme family
cF07875	441960.XP_002146364.1	4.5e-44	184.9	FG06820.1				fuNOG[21]	03NNP@ascNOG,0MCXW@euroNOG,0MNET@eurotNOG,0PJ2P@fuNOG,0XS63@NOG,13IN5@opiNOG,KOG4373@euNOG	NA|NA|NA	L	3'-5' exonuclease helicase (Wrn)
cF07934	653948.CCA22046	1e-11	74.7					fuNOG[21]	COG2801@NOG,KOG0017@euNOG	NA|NA|NA	C	Retrotransposon protein
cF07946	861557.XP_003301207.1	1.1e-14	86.3					fuNOG[21]	041F4@ascNOG,0H9JI@dotNOG,0JISI@euNOG,0PZE3@fuNOG,0ZHM2@NOG,14BP4@opiNOG,15DK9@pleNOG	NA|NA|NA
cF07976	13684.SNOT_05053	4.3e-33	147.5					fuNOG[21]	040DX@ascNOG,0HBC7@dotNOG,0JDWY@euNOG,0PXTD@fuNOG,0YSUQ@NOG,146JY@opiNOG,15E4D@pleNOG	NA|NA|NA
cF07992	441959.XP_002480722.1	6.7e-63	246.1					fuNOG[21]	03YI5@ascNOG,0JAG0@euNOG,0M3FZ@euroNOG,0MT7R@eurotNOG,0PW7A@fuNOG,114G0@NOG,143FT@opiNOG	NA|NA|NA	S	Inherit from euroNOG: Phosphotransferase enzyme family
cF08024	13684.SNOT_04956	2.6e-13	81.3					fuNOG[21]	04CYT@ascNOG,0H9KE@dotNOG,0KQVP@euNOG,0QCDQ@fuNOG,112IJ@NOG,13AFT@opiNOG,15CDP@pleNOG	NA|NA|NA	S	BTB/POZ domain
cF08025	13684.SNOT_04956	2.9e-07	60.8					fuNOG[21]	04CYT@ascNOG,0H9KE@dotNOG,0KQVP@euNOG,0QCDQ@fuNOG,112IJ@NOG,13AFT@opiNOG,15CDP@pleNOG	NA|NA|NA	S	BTB/POZ domain
cF08026	13684.SNOT_04956	1.9e-13	82					fuNOG[21]	04CYT@ascNOG,0H9KE@dotNOG,0KQVP@euNOG,0QCDQ@fuNOG,112IJ@NOG,13AFT@opiNOG,15CDP@pleNOG	NA|NA|NA	S	BTB/POZ domain
[truncated: 122 more rows]

[truncated: 4 more sheets: S11, S12, S13, S14]
